# Supplementary material
Source: PubMed Central journal article supplement (PMC6556895)
Supplement: NIHMS969080-supplement-Data_S5.pdf [file NIHMS969080-supplement-Data_S5.pdf]

# Supplementary Notes

August 29, 2017

The following EyeWriters took on leadership roles during the reconstruction of ganglion cells:

- Mentors helped novice players to integrate into the community and improve their tracing skills: aesanta1, galarun, mamateresa, michellewooten, Nseraf, rinda, damocles357, DannyS, sambob496, IcyCuber, jax123, addieye, susi, LotteryDiscountz, kronnn, Emeraldstar, ronin, b\_hailey, goodjelly, superrogin, Andrearwen, MaraTara, reb1618, tuner7, mam711, djajsl1234, scoobi, a5hm0r, Caffeine, lilmoo, Atani, dataminerstarr, LindseyAB, eldendaf, FishKAA, kinryuu, LCU, pkeoughan, jfine, Manni\_Mammut, Queensalis, skruffylooter, nopasaran, Byuda, dragonturtle, Fabiett, wm05055
- Moderators helped mobilize the community and intervened in case of conflict between players: galarun, jinbean, rinda, a5hm0r, susi, sarabc, tek50, Nseraf, kronnn, DannyS, marhav, addieye, lilmoo, michellewooten, mamateresa, ronin, b\_hailey, jax123, jungmanp88, LD2, LotteryDiscountz, angler.korea, aesanta1, darwinkim, KateLee, MaraTara, minsuyang, northingood, pkeoughan, nspainter77, benficus, tuner7, superrogin, xodhks9205, martyy\_plp, djajsl1234, scoobi, goodjelly, Andrearwen, m7md, mam711, ehmilkyway, Atani, LindseyAB, skruffylooter, Sunnyway, graigrai, reb1618, Fabiett, gracemansfield, kinryuu, lgrochow, lusiyan, Queensalis, r3, nopasaran, tfrank, wm05055
- Scouts reported possible reconstruction errors: a5hm0r, iridium, jinbean, ketta, reb1618, susi, rinda, azoarcus, testscout, galarun, marhav, tek50, tiikerikani, iam1105, grizle, hecticryryry, viksta, Spicythunder, addieye, ais, bigredjeep007, Flos, kronnn, kshearer, lilmoo, mamateresa, Nseraf, dataminerstarr, bachmann, AranzaJenkins, b\_hailey, cdaywalt66, DannyS, EllenRipley, jax123, MaraTara, retepaskab, ronin, shannonlevine, uzenik, clarrisani, eldendaf, aesanta1, blackblues, CreeperInfinity, damocles357, Emeraldstar, faunhaert, frabuleuse, jamiexq, lobusparietalis, mmcdermott55, sdunn61781, michellewooten, sambob496, LotteryDiscountz, LD2, Isigor, aldof, Andrearwen, BlackCat13, Cerebus, chrisrolik, IcyCuber, jbinsc, Kekelktus, nopasaran, theo1977, wlindboe, m7md, masterweaver, whitefieldcat, benficus, Byuda, Caffeine, dereksims, Freddo92, laxcav, Lgchinadragon, ouiz, prohri, sneakybaron, Varppi, Quinlan., aluorvats, hank78, jabsco, LynneC, mam711, Manni\_Mammut, mmichalka, Redemption, tuner7, Unclewiley, webnajma, wolfryder101, Xandrex, djajsl1234, Atani, Bormand, chifflows, davidheiserca, fullemor, kinryuu, lgrochow, LindseyAB, magret, martyy\_plp, mc-snee, melissa0774, MikeGB, sambarko, scoobi, Sunnyway, Cliodhna, cschein, dlsdl1210, dragonturtle, FishKAA, mkwak, neurosie, ngiaopao, rightnet, skruffylooter, eluchinat, jfine, pistachio, r3, brianamywa, Forager19, giallocromo, lsw463, lusiyan, Omoshne, Queensalis, rekrab, sajeffe, crazyguy, gracemansfield, nagilooh, Phil98, pkeoughan, wozzarelli, wm05055
- Scythes helped correct reconstruction errors (number of corrected cubes): a5hm0r, galarun, grizle, iridium, jinbean, ketta, marhav, reb1618, rinda, susi, tek50, tiikerikani, addieye, bigredjeep007, kshearer, lilmoo, Nseraf, kronnn, b\_hailey, DannyS, ronin, MaraTara, aesanta1, mamateresa, blackblues, damocles357, jax123, LotteryDiscountz, michellewooten, sambob496, CreeperInfinity, Emeraldstar, jbinsc, nopasaran, minsuzhang, aldof, Andrearwen, Caffeine, IcyCuber, m7md, dereksims, Lgchinadragon, mam711, Manni\_Mammut, wolfryder101, scoobi, tuner7, Atani, Byuda, chifflows, eldendaf, kinryuu, LindseyAB, dataminerstarr, djajsl1234, LynneC, dragonturtle, Cliodhna, jfine, skruffylooter, aluorvats, r3, domciviello
- eldendaf wrote code to automate the Scouts' Log, where Scouts and Scythes communicate with each other.

The 29,276 EyeWriters who contributed to reconstructing ganglion cells are (along with number of gameplay cubes): Nseraf (65949), scoobi (43764), susi (35993), rightnet (32554), twister2 (29656), tuner7 (27545), cschein (26738), nopasaran (24896), dereksims (24681), aesantal (24171), jamiexq (23126), toknow (22754), Atani (22259), a5hm0r (19935), elliesaysmeow (18309), lobusparietalis (18281), LotteryDiscountz (17996), carpwoman (17896), lopezlv (17789), toocajun (17648), kinryuu (17619), 17lion (17273), Cliodhna (16929), aluorvats (16414), eboyle23 (15530), aldof (14697), lili77 (14370), ronin (14264), Isigor (14134), m7md (14092), giallocromo (14039), reb1618 (13703), rekrab (12415), tiikerikani (12396), r3 (12128), MaraTara (11879), mam711 (11259), djajsl1234 (11022), lotus98 (10472), fidel (10441), sneakybaron (10377), tryffyd (10197), charleskoch (10107), michellewooten (9838), rinda (9235), jfine (9186), vogon (9143), ginny (9088), sjhy2050 (9014), Manni\_Mammut (8938), marygriff (8913), bri-anamywa (8727), freesong (8556), PersonalGamer (8346), gren25 (8186), colleencat (8176), jax123 (8174), Mmalia12 (8140), pkeoughan (8056), gracemansfield (8036), soniac (7918), kamegani (7915), jinbean (7866), mardim2 (7736), LynneC (7729), galarun (7713), Sunnyway (7671), jabsco (7669), britishclimate (7665), gruigah (7497), LCU (7356), fingerstyle (7307), pfenn (7271), Omoshne (7236), Queensalis (7222), jslykhouse (7180), dataminerstarr (7172), jcostantino (7166), Fritzchen (7159), bookbird007 (7115), mcrisch (7081), judystarbuck (7046), mmweiland (7021), ssaba (6668), ngiaopao (6638), lsw463 (6636), vbperrotta (6551), Varppi (6485), theo1977 (6431), smalljude (6395), jesmith\_nm (6389), pistachio (6356), peggyu (6321), morenci (6303), Igrochow (6246), wjddls521 (6176), DannyS (6170), 0303sb (6095), Unclewilley (6062), alswns4097 (5985), panosdalk (5933), mkwak (5757), melissa0774 (5703), yagu44 (5677), sliet (5668), newcity9141 (5651), mcsnee (5649), crystalhahn (5546), dsart (5539), mmcdermott55 (5528), jbinsc (5498), dhill23 (5419), Rosse (5407), kimjih0718 (5394), superrogin (5391), HerDug (5385), Andrearwen (5374), urs (5212), pandabear (5168), crazyman4865 (5111), ketta (5091), whitefieldcat (5011), lunarhyane (4981), dmlcks1228 (4929), mariomar (4891), berr\_90 (4887), MikeGB (4869), ArcanzaJenkins (4865), candychewning (4843), nagiloo (4839), duckgu92 (4812), Aigh90 (4763), elentari (4728), qk2922qh (4693), pdksc (4636), erinys (4599), Lilliscowleen (4599), Byuda (4553), sappygoblin (4539), wwindboe (4539), FishKAA (4484), hilmersbrain (4458), svincent (4417), nj4876 (4326), chijunse (4325), seo646 (4306), jinsol6 (4301), IgorOhrimenko (4283), tek50 (4278), skruffylooter (4243), ChelonianRiot (4222), mhs (4222), eyegap (4210), Emeraldstar (4200), AIWAI (4171), hank78 (4166), eduardoleitao (4146), thrkajrek (4145), seu1140 (4126), Mbrightjones (4119), tower (4090), bouncy70 (4079), vienna717 (4079), wayner777 (4077), dejavu1031 (4013), sherryhamm (3985), buco (3956), PhineasB (3939), lornetz (3926), amyec (3921), summer7656 (3916), Jac (3896), kwangyong810 (3891), dragonturtle (3857), teapackage (3835), nosers (3827), caphillipson (3821), Laurcifer (3816), qkrw1 (3806), Talifan9 (3779), dlsdl1210 (3759), pubcom (3749), sajeffe (3743), cadrake (3740), kkim9932 (3734), Richard.Henley (3714), iridium (3710), kirste27 (3701), cattract (3664), otto (3613), netic (3586), elise (3579), lynnschlos (3555), Anja66 (3533), Ayatee (3519), chrisrolik (3504), leehy250 (3500), bmaco (3499), clarrisani (3478), wozzarelli (3470), wolfryder101 (3463), 1024984595 (3456), benficus (3427), hjun9802 (3421), asd123 (3414), davidheiserca (3414), Philippe\_C (3412), wetterhexxe (3381), Caffeine (3374), mjh1660 (3368), argento92 (3363), oc3711 (3356), damocles357 (3322), 1059616163 (3272), dlwlstjr333 (3251), LindseyAB (3233), coryg308 (3187), kimjones1979 (3176), maryjoyw (3162), jw381097 (3150), tjwns105 (3123), ren53nyc (3082), blokmedwe (3066), cksgh645 (3058), blissdish (3042), MaLo75 (3031), sappy (3024), FractalCuber (3021), IcyCuber (2992), JNakamura (2980), cocona (2963), shakey\_man (2959), jandi1203 (2939), asnjhaley (2935), lklockhart (2933), zhfdk452 (2933), pingin (2917), Quinlan. (2884), dlscldn (2880), cestmarrant (2875), Yorwba (2873), chiflows (2869), NONOSORRY (2848), lisainsandy (2846), martinj (2813), knaray1 (2809), Certh (2798), MS (2779), msch.dk (2774), tomtrussel (2769), dreadpiratematt (2765), lcurtisadams (2756), magic3033 (2750), ouiz (2746), Hotline (2705), ybarthol (2689), graigrai (2678), jyri (2677), lemoncustard (2674), RasDan (2669), pishe (2665), vaeltaya (2645), Jwb52z (2642), rksdlqkqh (2639), architect (2637), faunhaert (2636), igor\_chebanenko.72 (2617), t2null (2597), mrmathi (2584), reate (2584), viegho (2574), masterweaver (2557), goodjelly (2540), ic167 (2535), mh5052 (2517), Antemmasia (2509), pacosafr (2478), ra3vdx (2473), beatrixbloxam (2470), jogakxxx (2454), wormofsand (2448), Rattus (2443), tschwach (2437), dmacdougall (2428), kuhno1980 (2424), dkstkdgus328 (2421), shannonlevine (2409), linkceo (2392), stellarbrain (2382), Kayarewhy (2369), boyan (2367), gadjo95 (2354), Passiflora (2348), game0009 (2325), christie (2318), amyd508 (2314), hecrod (2312), CathyK (2310), arrosa (2277), cathy43dti (2266), jwt1029 (2262), Terramine (2252), deniceb87 (2239), arzi1021 (2231), stevemj (2230), aspringer (2221), Magnoliahigh (2216), Robadd (2211), guhi3 (2208), mjviss (2191), falconheart (2184), kenmierow (2161), qorqoreh (2160), cbayley (2153), Redemption (2120), auntdeen (2117), ioas770 (2117), Iblakley (2108), lly2715 (2099), pollysingerman (2099), schlotzer (2087), eldendaf (2062), jte712

(2039), mpc75 (2039), 1085611037 (2036), solange (2036), Irai (2030), gardenpea (2029), minsak (2021), mag-gielnb (2016), double3r0 (1990), krittenhouse (1984), Vorlon (1969), chairflyer2002 (1963), jzettel (1958), eee7016 (1957), laxcav (1940), ljk3053 (1932), skl6284 (1920), Filatova\_Elena (1917), happyyj1997 (1915), catter (1910), peterahn (1909), alicestardust (1908), MoreInput (1902), tracer911 (1901), chickleodeon (1899), 65sprd (1896), awdlsx (1896), moabutah (1895), brianwilliamson (1891), Fabiett (1877), Cat4248 (1867), sumo (1861), readin-gite (1857), clarap (1855), gebe (1839), atlopes (1837), potenti (1835), sht301 (1833), funabout (1832), nspainter77 (1829), pilafonta (1829), qhtjd36 (1829), lindanicolette (1823), nkem (1819), sambarko (1819), 1044645208 (1815), mainbrain (1812), acida\_2 (1810), neurosie (1802), misterjstewart (1768), olti (1760), joelr (1757), robertb (1747), dv941294 (1745), mdtheater21 (1744), davis3792 (1743), stitcher52 (1743), sdunn61781 (1736), Emilily (1726), wls-gur7974 (1722), ellaa123 (1721), brainmapper76 (1716), rogis1 (1713), rillabee (1708), jaro87 (1706), Freddo92 (1697), Cerebus (1692), twistedtime (1687), sbpapa1109 (1685), rudska3443 (1682), thecoolbro101 (1678), Pauna (1675), pmh5954 (1675), opjkl4006 (1671), norm rhett (1668), aydenflynn (1657), b\_hailey (1654), dejerpha (1649), uopo4859 (1649), Albert\_von\_Herford (1642), blackblues (1637), adrian\_alexis (1619), drac (1615), dwarshaw (1614), Jay\_ (1608), rmissel (1603), day145 (1602), THOREAU77 (1588), gsater (1569), mollica (1569), lyzzard (1566), ja-sonrose71 (1563), whddnjs1234 (1549), devirumetmachina (1547), hyungsuk4341 (1544), xbp (1544), 4df (1543), missusweasley (1543), mowens (1538), psh0944 (1519), ohleyer (1515), tomb (1511), stillsmalljude (1509), limstory (1508), grizle (1499), sandyilfs2 (1499), tyypix (1494), wendy529 (1491), eroush (1483), nessoip (1474), wvdamme (1470), richardk (1464), luh1237 (1461), cdaywalt66 (1460), wallrue (1459), martyy\_plp (1457), ljw12442 (1456), vittorio99 (1456), Forager19 (1455), crazyguy (1452), Nbrady9 (1447), Dandy (1446), rhfm123 (1432), annaor-lando (1430), sjw3310 (1429), katerSonnbert (1428), Sheepdog (1423), sungwoo1230 (1423), couc (1420), tlthornton (1417), puetzcraig (1415), Dr.zippy (1414), maryal (1413), DCMP (1412), plymouthdave (1410), twhitehead (1409), ggreminder (1408), blacat123 (1399), Lgchinadragon (1394), rsp (1393), woals3585 (1393), kloez (1388), summit-peak (1380), amberskyes (1369), yernagates (1369), Ciy (1364), duanestitt (1361), luft (1359), Crabardaf (1353), jjw9706 (1352), celiad (1347), giselachristine (1346), jh06097 (1346), Chainsaw\_NL (1340), mmichalka (1339), jjho9604 (1336), izwtm (1333), aseol106seo (1329), klimp (1329), minsuyang (1329), philrod94 (1321), sjc2153 (1319), sungeun1214 (1316), read (1310), ljw4741 (1305), josegoncalves (1304), qwenml (1304), tnman (1304), slh-szlls (1301), bigredjeep007 (1290), annkri (1289), bestry (1289), higgsiee (1289), taceywhite (1287), JacqR (1286), topspot (1285), dama (1282), Louisiaru (1280), hhai (1278), CreeperInfinity (1270), eversuhoshin (1269), ablasky (1265), furball13 (1255), lauriptt (1254), seldara (1254), athensoh (1251), susanmatthews (1250), matollik (1249), webnajma (1249), koraynar (1247), kamorge (1240), staso (1239), tatarana (1239), biryyk (1236), orenico (1235), bwstudent (1227), kwon3693 (1227), rutho13 (1226), beckeemo (1225), bosjuffrouw (1215), ksup (1213), dkutas (1211), gentrymc (1209), PeytonP (1208), psimka (1207), usagidark (1195), bliztexable (1194), zcaqd12 (1193), canca (1184), nogoodkris (1180), wjdiwh33 (1179), retepaskab (1178), Emma\_B (1175), wojtekp (1174), iconforhire (1173), plcrawley (1173), bemaline (1172), jogarza (1170), dms1044 (1168), rudwns168 (1165), brockwayl (1161), psabour (1149), ghkdls99 (1147), andrewb (1146), tfrank (1145), 1129titon (1139), Lauri22 (1139), hojak99 (1138), bobarhett (1137), apteka (1131), pduncan (1129), ldrcats (1126), yeppi2002 (1122), bunna (1121), McIho (1121), 2000000WON (1118), ossomasticato (1117), sikan92 (1116), michaelaltman (1113), TyggyToo (1108), lh2iwire (1107), lolshanks (1107), eluchinat (1105), DonSchamott (1104), cavenius (1103), wm05055 (1101), jojefree (1099), kazarenko (1091), addd666 (1089), Kekelktus (1087), mollyb (1084), rlnhernandez (1082), shadow\_8472 (1077), Maejoh (1075), Ros-Dan (1074), ccolbert (1073), gauravpawaskar (1069), kronnn (1069), lilmoo (1068), lordzorax (1065), guilifr (1060), rprentki (1060), skdgd12 (1060), Cancanaja (1058), monarchspoil (1056), whitchry9 (1056), lynnai (1054), lu-naluna (1050), hiigaran (1049), yourion (1049), tomoyo ichijouji (1047), lukata (1046), mDC (1042), marhav (1038), david1908 (1036), Kargoneth (1035), GrandmereLouise (1033), anitram (1030), cordelin (1030), dont\_blink (1023), Anneinmo (1022), pycospain (1021), picoos (1010), Pichi (1005), Bormand (1000), keross (999), hilarylvi (998), lusiyan (994), sie18535 (993), mamateresa (992), woaks223 (991), chandreve (990), gartral (986), chuckster20 (985), 22nd\_Floor (981), wwwmkstr (979), Zababon (979), raduban (978), Davhornfir (977), lyndsey (976), wldms0610 (976), whddms9269 (973), Han (965), tktdot123 (963), tigerdotbahr (962), blabbermouth (960), evanshj (959), jay-bob20 (956), llin (956), magret (955), Sagheera (955), herty (954), morphamagus (951), tzarina8472 (947), god-slobotomy (946), withaar (946), ellerem (944), bigbiff (941), bernsh (938), rousselp (938), dbhunter (937), fredvancor (937), revel (937), CarsonReidDavis (935), Eric9644 (932), mirandakarson (932), hippo031 (930), Neuronix (929), notenbed (929), xogus9698 (928), metamonkey (927), tjd0413 (927), gusgraham (926), hanes2002 (924), addieye

(923), cjl77 (922), echoflying (921), maxy (919), dryczko (915), woodenhedgehog (915), me (914), password12004 (914), TheOne (912), drbyte (911), Juddric (908), JustHelping (908), deadlyalgorithm (905), 1711006 (902), zeptor (902), calico (900), aimorai (899), generalnotes (899), Marta\_M (898), fjwjk (895), merlmoor (895), psycop (895), grad2011 (894), schmelik (890), kyuhong1008 (889), Begonie (888), tndusl3000 (888), herrbusack (887), Wendy-bird09 (887), Dr.Ron (886), seunghoaba (884), Aradia (883), hohojojo (883), yby6338 (883), TomCraft (882), aneirc (881), ernest314 (879), dbyglan (878), kshearer (878), dfawcett64 (876), rkweir (871), bliss25 (867), zzahal (867), fdsailing2012 (866), Tater (866), sdrviktor (863), kkjhh6163 (862), fullemor (858), Jeancavallaro (857), dnsxo1255 (854), rlp1969 (854), miriaml (852), engadin (850), EZM (850), 1093787918 (845), carolmswiz (845), wesdxc1998 (845), rlarlgh97 (843), arrobarro (842), y991013 (842), Proteolisato (839), Iliyana (838), Bartt (837), yeon293 (837), karavskara (836), aprilwent (835), mrmoustache (833), monet\_open (828), Xandrex (828), sith (825), ehcl1208 (823), jeffiyap (823), mingu9810 (823), pepelino (822), youn9023 (820), redsoxwy (818), Sagaraghosa (818), lizaperks (817), lpsw0410 (816), jsb54 (814), mjoythik (812), thebarracuda (809), lswitch (808), cooljohnny3 (807), Elenlinte (803), MikeyG (803), hlmsuppo (801), giovanna (800), myrklv (800), yb0883 (798), Stebe (797), Wincey (797), hkelsey (796), garret85 (795), lmotsey (794), TL300 (793), colored (791), jsileo3 (790), seagat2011 (789), wenkeadam (784), ninab (783), jeoyoho (779), TheDAnimal99 (778), aostojic (777), HollyinAshland (777), lringelstetter (776), invest09 (775), zchan5 (775), ravissante (774), Teh\_chad (772), dnflghcksdl (771), Mastica (771), Christian\_66 (769), mim444 (768), bgrahammd (767), damablanca (766), mlsowers (766), Pennywise (766), texan\_hunter17 (766), leilabaroudi (765), barnsy (763), yongsk0066 (763), pjoyce42 (761), shpark2153 (761), disczil (760), Karenhal (760), kingzkw-mak7 (760), qwarty (757), batchen (756), TervGeek (756), janicemilliman (754), backupelk (753), jtowntex (752), sky-walker1 (749), EllenRipley (747), joy050530 (746), marka (745), kingtea12 (744), unburlayvble (744), cyberdork33 (743), smos2022 (743), coralialuna (742), technickle (739), jennifer57 (738), Bluerhyolite (737), dibbeke (737), sooseok (737), sirlarca (736), deamiter (735), hofstadter88 (735), Rainlover (734), seth (733), ssmtx6 (732), Eyon (731), Gozgo (730), hampton11235 (730), underin1367 (730), zuotian (730), bb\_mke (729), rlwns353 (729), bz07b8 (728), sjgedoc (728), aofliegner (726), kwonsu (726), mstanley (725), care (724), Jhe (723), marcefor (723), mansfieldc1 (718), momos (718), marika (717), slycooper (717), restcoser (715), jurkov10 (713), Craos32 (712), wiseerni (711), shini42 (709), timoflowers (709), hepatica387 (708), rigelan (708), tarapratt (708), daisykho (705), agthomas (704), dltldud0 (703), snik (703), aleclwall (702), cellogirl (701), guillelbardo (701), karajeank (699), ejobe (698), efwire63 (697), GrahamScarborough (697), bodrick (695), equus1556 (695), Dazzzer (692), hanami (692), anjenka (691), YellowVenom (689), mariemacdonald (687), darcpixie (685), tcurwick (685), cjmciintosh (684), helge (682), davidfranks58 (681), dlwotjr (679), examinerPD (679), jerryam (679), Malicasta97 (678), grmcmackin (677), dcburnett (676), hawaiiisunfun (676), pattyg (675), jbarstad (674), Kilrathi (674), Thenerve (674), bejota (673), marcus737 (671), dprime (670), flamingomarty (670), deborahj (668), potatoes1 (668), baraitalo (667), Neoronenblitz (667), aetherium0325 (666), jane.matsesha (666), soulcollector (666), rkwhr3256 (663), Limbri (662), Lochnivar (661), asitko (660), darwinny (659), theman2000 (659), duchessgummybuns (658), answjd626 (656), hangmanwa7id (655), SoyeR (655), mhelm (654), corvidae (653), smilinghank (653), wanderingstranger (653), MagneticHammer (651), RaulSoriaOrtiz (650), wildzbill (648), Ceelen (647), hwaja0203 (647), jordichanovas (647), jneu77 (646), bwags91 (645), Zitoire (645), Dtsmith43 (643), Blarggatron (642), 2morrowMan (641), sukhyun99 (641), rickwulf (640), borrowedbluebox (635), Jaskier777 (635), rtbetsy (635), sambob496 (635), arti (634), rhn (634), artur.klauser (633), Hasegawa (633), grockle (632), jungmanp88 (632), pguerard (632), tunisiel (632), angstor (630), inockach (629), holmesemi (627), emily14532 (626), meissnereffect (625), ekiri22 (624), kek (624), jdoncarlos (622), Naduka (622), egleaves (621), ElHadaHelada (621), Sotigan (621), drolniak (620), rufus150949 (620), SusanV8 (620), keshlam2 (619), parasiticwildflower (619), authornd (618), sofjav (618), kosmatos (617), emarks (616), 8924 (615), Meredyth (615), RobinAlice (615), FluffySab (614), lvislief (614), kkururu (613), sara525 (613), chenzw (612), vague\_nomen (612), Fhydra (611), ktomi96 (610), pfeifer (609), glarkin (608), rosneuron (608), dalcomlua (606), Borgnet (604), harkiesvf (604), geekboywonder (601), paperfolds (600), sniperdgs (600), thingy (600), auraseer (599), YanMan (599), 136andon (598), mlayten (596), Eric\_M (595), billock (594), tunmer (594), minisiebs (593), naromi1 (593), Tomghc (593), Christophk116 (592), Walverwandschaft (592), AnnaHeld (591), eunmorai (591), poisonapple (591), adamb (590), rachelunlimited (588), dquitzia (586), wonanee (585), Daria\_S (582), jpdunlavy (582), bileduct (581), yu-vall (581), jaimeasbury (580), johnsands64 (580), sylviutka (580), rosstamon (577), yuyw99 (577), pennymonger (573), Aaroncoyote (572), daggsta (572), svedge (572), spumcrocker (571), fairboxie (570), zkdlxh1532 (570), Ckarnish (569), hongcwoo (569), Raw (569), rileyfranks (569), turing8 (566), 0 (565), gwalockey (565), jn291982 (565),

kshs67 (565), betotico (563), Dopamine (563), ericafulness (562), helena1992 (562), 1062330970 (561), chriso (561), tishow (561), Cryaotic (560), olive (560), idril.piesdeplata (559), kintrbr (556), rinza0100 (556), aiuna (555), carbon-cat (555), myth (555), icydee (553), neo9 (553), vmd1972 (552), Bragsen (550), curiousepic (550), tvalesky (549), mblake5 (546), ska8133 (546), hsseung (544), phronimouse (544), yzh636 (544), MarekDutka (543), ross\_bales (543), gwinks (542), namilfan (541), ccabj (540), hick (539), sthompson06 (539), Pksc1 (537), awallach (536), cruseidr (536), JazzyJules (536), pkwayn97 (536), Creativity (535), hexidecimal (534), KingSalah (532), oliver007 (532), peter1986 (532), blowfish (531), flemma89 (531), turtlesee (531), essge (530), skyqween (530), ValdingerBella (530), mandaken (529), michielrutjes (529), CaseyVick (528), mavsrock27 (528), jojoful (526), xrnibor (525), awakaba (524), baalcat (523), teddlersuss (523), mrsmirrel (522), replacehim (522), rlmays (522), whomp (522), Newton44 (521), Waltika (521), BaronvonZucker (520), mingoose (519), omer (519), chrisotahal (518), TomServo (518), Vitis\_vinifera (518), eveilslayer (517), Flos (517), FraQcTal (517), colinra (516), leia0207 (516), fofomazuzu (515), magala (515), Cerine (514), mlovell (514), story39348 (514), Mrrl (513), craigmk (512), KieranN (512), Tatrixia (512), kes2521 (511), Dragonheart (510), wjdduqn (510), Fritigern (509), rvsobera (509), dischordn8 (508), neoncillo (508), Kaarno (507), EricRoberts (506), kris3452 (506), Miles349 (506), vitadolce5 (506), NathanKatzman (505), qwertyuiopz (505), anmonty (504), jardinpuzzles (504), mjeannez (502), suburbanexile (502), JHGFD (500), h.mouris (499), miriamel (499), roknerd (499), whatnow (499), Jem (497), TheDragon12 (497), kjen (496), LightPulse (496), kfailor (495), left-shift (495), Vladex (495), dobrochna (494), Mateutek (493), Shovels (492), YMT9999 (492), scruffdog (491), Tom-Marcotte (491), WoisdieKatze (489), baeun10 (488), tictacmint (488), Maelvandervl (487), mferber (487), TARAS (487), sarahizen (486), evel\_chihuahua (484), elch (483), Irakly (482), Olokia (482), outof (481), rebekha (481), DawningAventide (478), EnriquedellaValle (478), galerie1 (478), nashbery (478), palinfan11 (478), xasapula (478), jagates01 (477), gabgolly (476), janet (476), rumpole31 (476), titanika (476), aafenton (475), Arrows8 (475), fancy-vase (475), Nomitratric (475), dngudxor (474), GaertnerJohnNeko (474), labyrintha (472), seleniumsolace (471), cs-zlotarybka (470), iceCider (470), climbdaily (468), coolguy2 (468), dbarnkow (468), beckeemo\_again (467), nic0shine (467), tkatie217 (467), nilinhim (466), vilo\_grey (466), won00789 (466), zetetic (466), gTester (464), rkdanswns (464), tennifry77 (463), marktoulder (462), skacleve (462), Weski (462), ian\_danskin (461), denisehigg1 (460), durandj (460), mosak93 (460), rafikh (460), agentm83 (459), lizbith20 (459), SusanCotton (459), dntjdrb8 (458), sarabc (457), snobles (457), yja8834 (457), looker (456), malshafey (456), alftheextra (455), april (455), GalwayUnaFitzG (455), lpierre (455), bevalorous (453), austin.l2000 (452), Cromli (452), kjw2051182 (452), logicity (452), MissLiv (452), titousensei (452), go980918 (451), mufintime (451), amy (450), Kewne (450), tpfud41631 (450), illogicz (449), mbeckstrom (448), skeptikitty (448), mcd8604 (447), nimbale (447), dieselman2000 (446), GreatBach (446), jbjaeager (446), dldydgn123 (445), gedrod (445), ppotter613 (445), ravenfollower (445), Stopdroproll101 (445), frabuleuse (444), sbrooks\_pilotmr (444), smwood (444), ilona (443), marykered (443), mine5959 (443), rae.heitkamp (443), rspinder (443), zinnia\_flower (443), shamrockveg (442), dol\_brain (441), izzy4870 (441), kate38 (441), myg99 (441), AngelLeliel (440), cybermycha (440), falhorn (440), josephr (439), matej42 (439), smeal214 (439), mataller (437), antonioho (436), lesley (436), nicejune92 (436), PWPeebs (436), ube2o (436), Gugfvfgv (435), jaker (435), solzephyr (435), dkvm6123 (433), gracewylu (431), jpeetz (431), Majk\_de\_Bar (431), Melon\_K (430), thehugo (430), dreammjpr (429), erez (428), jsteinberg123 (428), lexerific (428), Minazumi (428), missconnectome (428), bjk (426), sapphiresun (426), doomed (425), mywire (425), Frankenshtine (423), collagehead (422), ggaffield (422), Plaidhand (422), aza-lea1011 (421), torokati44 (421), jin01056 (420), LEHoeger (419), leecooprider (418), vezz12 (418), hanamum (417), jongmin2 (417), MamaDragon (417), dorgh (416), karach24 (416), mru (416), alou504 (415), bdesmartis (415), chialchemy101 (415), LegionMammal978 (415), rajkalex (415), dasjulchenm (414), erhome00 (414), Incend (414), JLederman (414), JoJoMac (414), hibiscus07 (413), NeverAccurate (413), victor42 (413), alexe (412), wyvern233 (412), bjan (411), Charlie1 (411), haleem0803 (411), LipAnn (411), thesandersdeath (411), kibouhi (410), slslgld0 (410), jenh (409), KayFires (409), simulacron3 (409), slarki1 (409), tiijhus (409), tkdtb (409), Tom\_TBT (409), TrumanBurbank (409), cheesethief (408), hannele (408), qkqjqkqj12 (408), alska12 (407), nima (407), ohohooooh (407), paxon (407), RhondaWelborn (407), rsbs01 (407), thegreatgarbanzo (406), 73 (405), werecake (405), Aenyeweddien (404), alexweasley (404), ebouardon (404), nnnn20430 (404), trau (404), aswartz (403), SATLas (403), sugarbuzzing (403), asdsasd123 (402), mon7468 (402), NyamCat (402), phbou72 (402), rcs39 (402), heatherandjim (401), black-guy (400), StanleyScience (400), Volonden (399), ibisenc (398), Ivova (398), Mingan (398), nowayout77 (398), ratta (398), trailofscapes (398), venerac (398), Awesomefrost (397), jonesgirlferrell (397), mhutson (396), rwd1111 (396), Almadena (395), chl0943 (395), Fourleaf37 (395), Mateon1 (395), whatthecode (395), echo (394), speedfranklin (394),

bbthrill (393), beez (393), camelsfallover (393), depou (393), upcyclist (393), Yark (393), Abbacus (392), conscience (392), kgm2804 (392), quasarquantum (392), tichovsky (392), jll387 (391), mh8190ms (391), spriteling (391), Jowita (390), lauli (390), hakeem82 (387), jlovin (387), lamebrain (387), shelby2190 (387), sylvaflame (387), baek449 (386), cogolf (386), guswn5828 (386), petikalo (385), ttttrrrr (384), TylerW (383), cbear59 (382), BlackCat13 (381), cveron (381), townshenge (381), aham (380), 17tbindrip (379), Elcarim (379), nair88 (379), Pascal66 (379), ceh36 (378), JacquesG (378), deliaknight (377), Ditsch (377), xy479why (377), 1072870852 (376), Ania19 (376), bradtaylor (376), fmerge (376), gemstate (376), Woong (376), highblood (374), alexae6 (373), crawatt (373), geminiwb (373), ghdtjq1221 (373), jskiles (373), jungsicy (373), stats\_demon (373), Caprise (372), mandokir (372), melodiebenford (372), mida\_king (372), sujin1439 (372), Asavari33 (371), huhe (371), lusienich (371), megaschara (371), sova (371), yamantyu (371), feejes (370), Rainboom\_Dash (370), jenwolfe8 (369), minjinlee206 (369), pkg0330 (369), etgst (368), fly400 (368), KreativLeo (368), LtStaffel (368), vasok93 (367), bichlmair (366), Sujuperstar71 (366), AKhajah (365), cjoy161 (365), adiafora.est (364), awakn (364), coconutO (364), lieryan (364), mambosamba (364), Chemguy1611 (363), elgato337 (363), stark918 (363), parhaml (362), turing (362), ish1102 (361), m0mchil (361), mariastuart (361), Waffle01 (361), hharder (360), lilikaeding (360), anternika (359), klaus13 (359), snail (358), yhs06280 (358), \_ (357), dialfhd (357), mafan (356), serych (356), shrajke (356), diizeiaj (355), igort (355), ldm2020 (355), scopedriver (355), whoheckhe (355), xxxzxc (355), zkm (355), aliquot (354), fendi (354), pottsy47 (354), RISINGSUN (354), christopherepc (353), iskhakovt (353), okaywilson (353), neon0219 (352), nom (352), fim42 (350), jemtech (350), limamoon (350), darajoe (349), leelaht (349), mathryn (349), pshaw (349), cherylm (348), DeShad (348), Cbay (346), Frosteh (346), gomezannah (346), nasryn (346), saxywolf (346), tastypaper15 (346), vcook12 (346), zachboots (346), nairanvac (345), radeknek (345), eyeguy2001 (344), korenm (344), Randomfull9 (344), Axy (343), muh1117 (343), ArneHeessels (342), HariSeldon (342), hitro89 (342), Phosphorus.yt.and.zd (342), sciamachy (342), itisnotmyname (341), janel13 (341), omgitsomeguy (341), AlexanderMichels (340), caern (340), Kiszyszka (340), redbreadmcjagger (340), agelston (339), ashartrand (339), maxbgreenstein (339), Shtern (339), chlgkdus90 (338), gronskpyk (338), hornet2k (338), npatnode (338), chrisnessity (337), Dobredrevo (337), kimjisung78 (337), arai (336), heptolisk (336), hana03 (335), justagirl (335), pyropuppets (335), randompsonjci (335), HanaaS (334), itamarhaber (334), TheB-Tanker (334), Elguason (333), tualilja (333), zledonne (333), 8982679 (332), bobbygirl (332), datacute (332), Disper (332), edremy (332), kolalelf70 (332), kurat (332), slated (332), wappentake (332), gruneNG2 (331), jango12 (331), papermaster (331), candori (330), gerlyhan (330), maastolman (330), ten6314 (330), ushiii11798 (330), abrakadavr (329), whknight (329), hi88hi (328), irinayf (328), mmludvich (328), nb6349 (328), deterak (327), ishikakushin (327), jlspartz (327), Stuish (327), briguyoorr (326), helmars (326), dazpinner (325), drose (325), hannahmarie (325), Ivanisevic (325), taboen (325), ecrane425 (324), ekmp1 (324), seanmelliott (324), CharredNewt (323), cheezx (322), Ania89 (321), coralbm (321), mistermole (321), skeeter\_mcbee (321), weizhe1983 (321), admiralfubar (320), dfbarnett (320), kramedar (320), lj787 (320), seoane (320), tamasi (320), jasperd (318), Malicord (318), stewhi12 (318), thevogfather (318), balawson (317), bugo (317), gtorelly (317), jujung27 (317), lifesnotasong (317), xorud0723 (317), Morphy (316), wldndsla4 (316), dschenk (315), hellisoued (314), juliedp (314), Kerdj (314), syswwwd1 (314), andnerb (313), notiempo (312), uprudtjr123 (311), cenright (310), CTRjfl (310), GosiaWoj (310), rnorthe (310), alsrlehl (309), BlackBeltFairy (309), LeonDaDude (309), Hannibal87 (308), izdebskaaa (308), Petnek (308), Simek (308), skaiskai (308), smedrick (308), bmcguffey (307), N0str0m0 (307), wgrudd (307), yujin2125 (307), nickcedwards (306), Olman (306), 4ghp22 (305), clare (305), eqiq1127 (305), hsureka3 (305), jebkerbin (305), jjw1932 (305), pzo-diac (305), Theta (305), trashfriend (305), Alba276 (304), danube (304), wjdgy234 (304), kiha (303), mjwt063041 (303), rustybrazenfire (303), 2labview (302), balkamm (302), pkly370 (302), schnubbelpups (302), .oregano (301), 112fkldjs (301), by\_sky (301), cmapdx (301), haz (301), kharcia (301), SkellyJelly (301), atwistedlife (300), benballintyn (300), cpcobb01 (300), inco (300), Keiken (300), wonwater (300), hedgehog53 (299), ultrapeanut (299), songbabe7 (298), VeggieNinja (298), 2legit2quit (297), claireoconnell (297), Elloris (297), moc\_donalds (297), PHinden-burg (297), chrysanthemum (296), DaFROG (296), mjlee1118 (296), PLuz (296), quantum413 (296), twhitaker42 (296), idpw3 (295), tjejrtn1066 (295), acaceres (294), aebarnett1 (294), FeldweibelBrony (294), rybaciagula (294), siblingrivalry (294), thrustmaster64 (294), iain.dewitt (293), adavej (292), hydraz2 (292), jorwat (292), mswoodard3 (292), soundcaster (292), tnrdk03 (292), arkonpl (291), bajahab (291), Bazinga (291), chadcoleman808 (291), computermage (291), cwenzel (291), ic (291), martin.von (291), Neonnq (291), sradford (291), tkryton (291), 4x4jeepchick (289), brittanys (289), kellydh (289), kimsang1 (289), pandasecond (289), VVVV (289), jackray (288), kwy9022 (288), Psychlone (288), shj06308 (287), completdyestrday (286), davidsimp (286), devonjones (286), hermes (286),

Saki (286), smartina (286), doctorwho1598 (285), joshuaJoakley (285), kclevidence (285), nickid (285), JMH1214 (284), julianglas (284), rdaniel (284), robu2358 (284), yoffset (284), zichuan1028 (284), artwinged (283), dougrike (283), Fierce\_DeityX1 (283), pinkpanther (283), prohri (283), schue127 (283), ELIOTTK (282), paladin\_67 (282), rickyspeak (282), scrialex (282), sfx (282), trill (282), claymossterrylee (281), jeancavallaro10 (281), Malakiash (281), alanisfer (280), eye144 (280), hakona (280), Herbivorist (280), ItsNewToYou (280), m\_pingoo (280), mvdm1990 (280), Richard12 (280), alexisgrey (279), Alvin11 (279), Cerialis (279), hys0811 (279), pfitzgd (279), r\_gibeault (279), rmrhhome (279), treid2582 (279), Hundas (278), JackS111 (278), karenza (278), reeses624 (278), Treffling (278), Galunik (276), lauraw (276), Riley\_Light (276), fsgrove (275), lillywest (275), sedington (275), skurr7 (275), 1094412513 (274), jontahan0825 (274), admiralfury (273), Boop (273), kruxigrim (273), Lizzie98075 (273), onechip (273), superstark6 (273), arlind (272), dale\_lemaster (272), igid (272), MasterVicen (272), jhheijmann (271), jonnyx12 (271), jugglerbri (271), ShuRuPin (271), carte (270), sandrad (270), eogml88 (269), ljk6431 (269), mrpetegraf (269), ahanssenm (268), ana94 (268), bluyonder (268), forever777x (268), joseerre (268), k3 (268), koska\_xvost (268), musewire13 (268), wjhshiao (268), burtpongo (267), foobar\_germany (267), spes004 (267), sridharsm (267), d2coolba (266), diegopez (266), kernfel (266), Leopard (266), Overdose (266), sjoebidoea (266), yamikara (266), gonadarian (265), hbb (265), mediarus (265), quincy (265), walty (265), blaxalb (264), copinev (264), gahh (264), Hulkster (264), hyacinth04 (264), jazzzzzzzzzz (264), kagej (264), kgweisman (264), syllogic (264), BrightLance900 (263), Brigistar (263), deadxdying (263), es3ban (263), Fazt (263), swingdancechick (263), BenSilverman (262), dummypostfach (262), Gzngahr (262), kategree (262), Michella92 (262), perdy (262), poilocol (262), dlwngh8720 (261), rymccarthy (261), charna (260), D.Mitriy (260), irisgs (260), jhpark0607 (260), pagdzin (260), pinormous (260), ReiedLaw (260), bostononelwood (259), bushido182 (259), gold (259), thunderbirdz (259), adh02us (258), euanr (258), Froppel (258), hal9001 (258), it\_ohs1018 (258), viklar (258), workinwifdakids (258), bcnissley (257), cyrouth (257), czager (257), DahliaBones (257), F.F (257), MagnusDeLions (257), Sgaile (257), whaleback (257), amgamg (256), AprilDolly (256), darioarena (256), Luciloutre (256), nash (256), skanfkrh (256), aaass28 (255), apocakiss (255), Civet (255), codeboy (255), grannyg (255), hojoon1226 (255), insiderart (255), kevinwitak (255), lilybef (255), madcow69 (255), r3dmischi3f (255), renda (255), Swiper (255), chelsea578 (254), fyujh (254), kebernaxor (254), prothus (254), pteranodonpilot (254), saspist (254), alexey (253), bluebuster11 (253), ChubbyCat (253), dragonmike (253), mimic751 (253), nobu1015 (253), lys11091 (252), Plaidomac (252), rhurlbut (252), w00f (252), biggfigg (251), bpardo (251), CZHeron (251), Szelma (251), BrainSpasm (250), kadmin28 (250), Loto (250), mysticman138 (250), nogari (250), stefans (250), tabster (250), aaiken (249), jacekf (249), Lethe (249), Oslík (249), alexys (248), an23t23s (248), mjvonstein (248), noctivagus (248), Simulant (248), Chao217 (247), cherip (247), gusghl7433 (247), hoess\_c (247), Lostmymind (247), tets (247), jun105401 (246), lulumylovely (246), turtlepie11 (246), wander\_fr (246), apisacane (245), garycorr (245), kagebob (245), louisycphre (245), miltonia81 (245), nkaschwarzkopf (245), sjfone (245), Thargor (245), blue\_minded (244), brenobrtk (244), PcZZZ (244), TheNozzle (244), cherithgreat (243), Neometron (243), rosscann (243), synapteck (243), synth (243), wtheurer6423 (243), Zaynee (243), anmbia (242), Cybershaman (242), Exotje (242), jonathon (242), jonathan7p (242), AdrianoKF (241), apflash256 (241), jmwc (241), jordihir (241), kobuki82 (241), miststory (241), prsyamraj (241), rlejrcjswo12 (241), synsystem117 (241), weatherdude (241), diagonalfish (240), kkh20nice (240), krabbe (240), lsproper (240), Nikki.Camp. (240), pizpot1234 (240), Ruthalas (240), aelivate (239), alexddf (239), azeyetech (239), Benjamaster1 (239), cawendaw (239), haptic (239), hello1000112 (239), julianalong (239), marek7 (239), Nyabi (239), sidran (239), Tedux (239), theforsch (239), dashofnutmeg (238), naru (238), 10longlife (237), boring4695 (237), ebruckner (237), lpsw0411 (237), ozharko (237), thiel (237), acamachodepass (236), angelas (236), bettyahrens (236), collurio229 (236), CyberPon3 (236), milara (236), mimiheart (236), mrcookies2 (236), nd800dbs (236), PrincessE (236), yangzi (236), 013158jeong (235), Altaire13 (235), ErikoOono (235), flyingrat42 (235), lewstoleme (235), Tzous (235), watchman99 (235), youn6501 (235), Ando (234), antares1957 (234), AzureJay (234), FeccY (234), Fulldiver73 (234), Jano79 (234), loveseoho (234), zelnicki (234), aabar (233), jiberjabber666 (233), martlnko (233), musca (233), cddecandia (232), chase (232), Cmilesgray (232), htw3050 (232), mellentm (232), richarr (232), atypicality (231), Enma (231), mark2000 (231), spoonbow (231), Terrag (231), tree827 (231), jocko (230), kyy2000 (230), mlweiss10 (230), ttiger1998 (230), brainlover (229), dragonwinner (229), flucorerd (229), kristachio (229), lmk2012\_ (229), thompson5984 (229), devn (228), jongwar12 (228), lost260 (228), Palaing (228), rune (228), 1091927563 (227), addierm7 (227), EvaWu (227), gpw11028 (227), kny4198 (227), matt304 (227), mms502 (227), Moonrise1275 (227), ppl (227), ravensshadow (227), egonzales (226), francesl (226), kmiller405 (226), normrhett (226), andemon2000 (225), blindsniper001 (225), djddavis (225), eugmes (225), gparker321 (225),

JUNI (225), acidcats (224), ah (224), chwa (224), dansilber (224), DigiAspie (224), Imerry (224), wanderNavi (224), 1233803 (223), annalesa (223), cpmckee1313 (223), dewondolynia (223), EdHolland (223), irene7micro (223), king-boyd13 (223), Muri (223), honbioAON (222), Humanoide (222), Jobri720 (222), romgle (222), rosscarter3 (222), TGoffi (222), UnitedxVI (222), vretienka (222), ajemanuel (221), almightyfridge (221), anastazia (221), andr345 (221), davetroy (221), mileslane (221), ramshorn (221), shammerand (221), Tatyana\_Violet (221), Wilkl (221), wolfoftheredrose (221), c64ham (220), ehdgml3391 (220), EKhlebus (220), gorynych (220), Marc06 (220), powermoose (220), somna (220), zooror (220), Beuda (219), Nikto (219), Tilo\_Hentsch (219), welo3 (219), yunyoung93 (219), esolivalejandra (218), medusa (218), paps (218), turtle (218), jnielsen (217), markfool (217), mnbflute (217), scientificPastime (217), arachnae (216), gdnskye (216), greenlizard (216), hanh111 (216), ilukarak (216), kd7937 (216), lula14230 (216), spb00000 (216), wendab (216), greglanders (215), highman78 (215), impulse585 (215), qj2130 (215), AnnaStachowicz (214), Chief220 (214), eremenko (214), eschereality (214), immortalone (214), kneazle01 (214), Lux00x (214), pepf (214), TPNewell5000 (214), unafitzgerald (214), figgle (213), Janner (213), jna4747 (213), kjm8738 (213), magdorn (213), moonsiri (213), odc (213), SPahrah (213), mkm26625 (212), oranges142 (212), qwerty7878 (212), t3hnerevarine (212), casteurr (211), schleicher (211), tjduxo (211), zlateskii (211), Art111 (210), asel (210), mthomas208 (210), wlatmd7 (210), azver (209), David777F (209), gizan (209), h3xch3ss (209), HotlineChicken (209), k80805 (209), mm (209), phlick (209), AdequateAdj (208), buglab (208), Headofibis (208), jaymax (208), jeonging2 (208), wolven\_moonstone (208), darkchamp (207), kevkingofthesea (207), pcormac (207), popel (207), Tamas (207), airesp (206), benjnima (206), carleye (206), emers\_boss (206), hwhitesell (206), kirmeo (206), knowxqq (206), marc\_lewis (206), ringring (206), Tibor (206), 970328jw (205), gomez (205), kmccook2 (205), MarkMasaryk (205), thajazzlady (205), verdy (205), 5818kdh44 (204), andane (204), antiheroine (204), lordandmaster (204), markd21 (204), CU (203), dolphinate (203), gabrielwill (203), Nikoleta (203), OdiwaN (203), phillip\_miller (203), r\_eamke (203), toriquos (203), Agari (202), Sigmus (202), sing146 (202), supertiger (202), uuav (202), wingnut (202), y820728 (202), barterra (201), Chairlie (201), flux (201), jon\_selden (201), JSHolic (201), lhsouza (201), Prism019 (201), tool789789 (201), Unis2014 (201), zyfi (201), annie3472 (200), chunsany (200), EAG123 (200), jujeelie (200), MandelDoom (200), mbutu88 (200), nawaorl (200), przybilla (200), rutho (200), talbotcatherine1966 (200), yawnG (200), rubiking (199), tery (199), TheFinisher (199), blackstormn7 (198), compguy09 (198), CWCorrea (198), guti114 (198), jyjs1031 (198), LMac (198), Mufionius (198), stipps (198), ochka (197), ozabluda (197), Voxelus (197), alicemargatroid (196), brandonberchtold (196), dainesl (196), holon (196), laurenlabo (196), rdotpope (196), rome723 (196), stellayang (196), Tanda (196), zkwlkdsk (196), atypicalist (195), bebe1817 (195), eunoia (195), ggully (195), jesken (195), jlevley (195), Martitta (195), nemetz (195), panthera1 (195), psychojammer (195), rachek (195), smeksica (195), theunpire (195), a26356194 (194), Dodam (194), jasoneriksen (194), Mzungu (194), satoriend (194), sherapchodron (194), sli0701948 (194), wiresepp (194), ctoney1997 (193), kubakoniec (193), lolymie (193), nayo01117 (193), saowo2000 (193), cvanveen (192), dellswanson (192), foofighter (192), MEWWitham (192), naspam (192), ratloaf (192), sparkst3r (192), vlorschnat (192), Cr10 (191), jpiolho (191), justintwayland (191), liibundlojoy (191), lookanelephant (191), snake1989 (191), 1083706775 (190), BoredRaichu (190), falcon3515 (190), katfinder (190), popeyez987 (190), TopQuark\_ (190), ukyung715 (190), Zarkark (190), 7986017 (189), Cville114 (189), decapod73 (189), fowler.a (189), hadonos (189), jmnardone (189), kanso (189), klm6313 (189), lallander (189), littlebum2002 (189), glumik22 (188), jmaster (188), jmprider (188), luciferlmao (188), Niebla (188), rosapf (188), saguti (188), seasharpe (188), terapico12 (188), cgilbertmt (187), coreyh23 (187), Dosenfutter (187), nogal (187), PoNyePiC (187), saskfire (187), scndz (187), Seveer81 (187), sfree4all (187), tangibello (187), vipersrt3g (187), wnsur5443 (187), alyssaperez (186), anqn (186), ariellevan (186), burhop (186), gingergirl27 (186), grzejda89 (186), kraknor (186), littletony (186), radovan.drabik (186), annex (185), devilwaydown (185), Mateusz.turalski (185), rasheeda101 (185), ravenofborg (185), TrueCuriosity (185), xupiter (185), emmtee (184), gatun (184), Hfaua (184), highclass (184), nathanielavery (184), nazriks (184), dhm04042 (183), FireballMarc (183), Ghostron (183), Mielieman (183), momadoc (183), sa\_sky (183), screwloose (183), Shand (183), unicorn9018 (183), Zickzack (183), alexetciboulette (182), callmemop (182), dc6868 (182), flyingibic (182), IanandDeb (182), jfpickard (182), jseenthefuture (182), naro (182), NeuronicGuy (182), sdemers (182), tania\_7070 (182), 1h7k2t9 (181), Grand\_elo (181), holli (181), lemwiwinks (181), minnu (181), newneuron (181), noosey (181), Rundmaus (181), semaolvidao (181), sterm (181), anneli1221 (180), edylisation (180), Falgoriend (180), moche (180), t\_yuki (180), timtimmytim (180), asdf3011 (179), AufklarungNL (179), care1025 (179), cartersm (179), cassandra87 (179), felixe (179), hermosa17 (179), jrjch79 (179), jumpkeh (179), keco0050 (179), ladykaro (179), laughingmonkey (179), Mereni (179), mrmrdan47 (179), Obix007



(179), stev42 (179), twigdeepwoods23 (179), cybershark (178), iTzAnTh504 (178), krobi64 (178), lazymuse (178), lyjin0526 (178), mottiger (178), porpoisepower (178), Sandbird (178), gomezn (177), kt1004972 (177), PieThrower (177), sgtpepper9091 (177), bavykinevgeniy (176), blaabjerg (176), jero (176), jessejames13 (176), lmhch56 (176), MakiHime (176), muchens (176), mutharhm (176), paethon (176), rningonfumes (176), theswedishscout (176), tobster (176), tobykenz1 (176), tsandy (176), wanty (176), wschalle (176), angie12321 (175), aubrey (175), Balrogos (175), catan97 (175), dsharaf (175), guarantee114 (175), louischarles90 (175), MadBlack (175), neurona (175), raul\_idcg (175), sciamanna (175), arising (174), bored\_on\_the\_web (174), CharlieLeeLee (174), davis1 (174), dilbert3k (174), espero (174), jeantherapy (174), karijnk (174), khj980211 (174), LuaCat (174), Mariahkitten (174), motoo (174), Noctilucent (174), Shimapanda (174), tjddnjs0730 (174), Xenone (174), bethvers212 (173), DrWoctor (173), gren-delkhan (173), Hirse (173), ingyerkim (173), khrayt (173), mrsthursday (173), rankinc (173), rmgraze (173), sorek.m (173), tmpeirano (173), wwsmurf (173), ab020619 (172), cweddy (172), duskvill (172), EteveArnaud (172), f3rm1um (172), feanor92 (172), gdawg5130 (172), jonnableel (172), LateralThinking (172), panta\_rhe1 (172), quanty37 (172), quswkddnjs23 (172), Riki (172), tada (172), tomcat (172), victordbs (172), antto (171), BeardedNurseMan (171), brinkhm (171), educmale (171), grantinchina (171), jkrzyz (171), juniemonster (171), mberna00 (171), popec (171), sechs.hex (171), CTCRCu (170), cuniberti (170), Hadesis (170), kali13 (170), Kaputnik (170), miguel.jodra (170), pliocene (170), simonkaytamas (170), zyphuris55 (170), 10562034511j (169), georgesimeo (169), Jelisawieta (169), KiryuinRagyo (169), mimimelo (169), momiga (169), pupo1385 (169), pwisniowski1 (169), 0314rhs (168), bigci-tyboy2 (168), hyessama (168), hyunssa76 (168), kockas (168), nsi04118 (168), Roszp (168), Scot.a.murray (168), Sooldy (168), SusansHusband (168), teddy3ski (168), 2cats2255 (167), AsDawnBreaks (167), cks1992 (167), cobbst (167), dowhatisay (167), Hazelinka (167), lindsayjilk (167), mafgurl (167), red1932 (167), sethiroth66 (167), thom001 (167), asauerbrei (166), Auntecedent (166), jyqm (166), michelle127 (166), rflynn (166), ShawnM (166), sihara (166), yuandy (166), apo2 (165), caroagse (165), chaetophile (165), d\_asterisk (165), endercat300 (165), Enorasi (165), homer1990 (165), jessemcbride (165), near1023 (165), Oblyvian (165), olivalejandra (165), rando0828 (165), streamsea (165), suneva (165), bimble (164), DZH (164), efhw (164), forscience101 (164), MadameZsaZSa (164), mushufeeny (164), rwor (164), tankerreturns (164), WilliamBlake (164), 3385623 (163), amritmarie (163), auerbacham (163), bfire27 (163), Chance2288 (163), cityghost (163), Conrada (163), lem21h (163), mdl0100 (163), millerjonathan22 (163), scottalap (163), shadowwww (163), testtesttesttest (163), vvvaleee (163), avergo (162), bikwai (162), harydyn (162), lucas73 (162), maewaffle (162), mellowfish (162), n014np011i0 (162), rcgir11 (162), altnacht (161), amnesia (161), anamarly (161), bjh9710 (161), dejan\_dejan (161), eL\_burnso (161), eliner (161), emmam (161), Galestro (161), Gecko (161), GreatUniter (161), honeybzz (161), kcandm (161), llander (161), mcfirefly (161), mlfoster (161), Olgierd\_Swiecaj (161), sakura13 (161), serge (161), spectra\_soul (161), stridesofcobalt (161), dvixen (160), hkc29 (160), jdansolis (160), jowshp (160), jschetterer (160), kastakan (160), siese (160), uryacorm (160), yayforfood (160), zespy (160), zzangorc99 (160), cyberVgamer (159), DogeBadger (159), jle9061 (159), lulu-goesboom (159), pastymage (159), tectec (159), pycrow (158), rbaker314 (158), robec75 (158), ryppgall (158), ur23 (158), akerspaark (157), cademackin (157), Cor (157), danbar (157), enavarrocu (157), flouf (157), lambykins00 (157), Leehyuck (157), pluptak (157), Psiclops (157), razorgrass (157), sgtbird08 (157), socksinstripes (157), sopillo (157), ash7 (156), gadwicke (156), hillary625 (156), hwaaim (156), Jooni (156), jujuemsampa (156), kdlarson (156), Kuzim (156), macdoes (156), nb02531 (156), Riemann (156), samron97 (156), sheltiesmart (156), tayrrawr (156), teepeck (156), xzxz6939 (156), Choi93 (155), Cmdr (155), golfluvr (155), jinminkim (155), Jlovin757 (155), kikipoul (155), Kristian (155), Moltodor (155), ryutsashi (155), Stichflamme (155), toscaxyz (155), trevor\_davis (155), allista (154), alstjq2706 (154), brabant (154), brinlong (154), dawn1234 (154), jcdoughman (154), karenlane88 (154), marisa0122 (154), nerdbrained (154), szalardy (154), Astrodronaut (153), cikcs (153), dojinjjang (153), ehgmd0224 (153), esoter-icsurgery (153), glsmo (153), itburnz (153), jesiswinning (153), jicksaw (153), jluscher (153), jmonderer20162 (153), Justas (153), Justino99 (153), sneider (153), sterrennevel (153), tara\_a\_stewart (153), bark (152), chab (152), charina24 (152), ckt221 (152), ddeath (152), Geirr (152), MsWalrus (152), Nox\_95 (152), pappsen (152), rin73 (152), shokuno (152), tehbooshwookie (152), zode (152), ElijahChong (151), gasper (151), Lieven (151), michaelo (151), sharpthings (151), svk (151), TR77 (151), yoyochris924 (151), zzaltz (151), AnaelG (150), cloud85q10 (150), dswansonsb (150), jamwaffles (150), kittiesgomeow (150), kornelia (150), mardek (150), mind\_less (150), onebadmoth (150), pribyl007 (150), takashi (150), tupperharley (150), Arthemis (149), enoch.de\_nod (149), freemint (149), hawkin (149), hrodgeirr (149), jamestom999 (149), jole881 (149), Jonezi (149), kiho1222 (149), kisu (149), PRG3D (149), shotoelite (149), Slartybartfass (149), spant (149), TIKOREA (149), teddythebear (149), tryeye (149), xcell76 (149), bestienne (148),

crize (148), cruzg4 (148), dalia85 (148), elye (148), gksals5262 (148), hcmcminn (148), karens (148), kasimclean (148), lolio42 (148), mrmibbler (148), oathbound (148), phh2000 (148), stalwartspy (148), thalamus (148), BTimmerman (147), daveyj (147), dlwodnjs1119 (147), fedotka (147), fortaaak (147), ingrid3 (147), Ledakins (147), limonk (147), mcchev (147), redsanurse (147), ThiOrange (147), Tirla (147), vijay\_ramasamy (147), zeemdeel (147), Zeggo (147), anshulk26 (146), Aromun (146), coralizzie1 (146), jkecara (146), sunwitu (146), zekaiser (146), Baltasar (145), burunduk3 (145), Carl\_yoon (145), CourgetteAgile (145), dawnsylph (145), Jiff (145), Jungwol (145), knzk (145), Murre (145), naruto73176 (145), Parks16 (145), roscula (145), sdukfylsaierhkjfn (145), sphinx1919 (145), timekillz (145), uzenik (145), vynai (145), Arkady (144), arrakis (144), asdzxc0314 (144), avursu (144), azaque (144), dianasorg (144), DrRyan (144), gauna\_ariel (144), jhj1441 (144), palmyra (144), pawingard (144), Reteiper (144), roy12345 (144), smartsphere (144), sunday2727 (144), SuperChihuahua (144), zagor (144), zaniah359 (144), brad95411 (143), carata (143), dianagardina (143), dougforester (143), grmpfhmb1 (143), hklingon (143), jimmy\_xcb (143), LiamWhite (143), linyz (143), Maranca (143), maverick1387 (143), metro (143), monzi (143), poncho (143), somnivore (143), stb810 (143), xteejx (143), Arctica (142), Danis\_Bang (142), esjun11 (142), falk3r (142), fieldsimon (142), Fiffi (142), floiqw (142), froschi (142), haxsoo (142), jacesky (142), jglee96 (142), joconnor610 (142), Katerific (142), leynad (142), Nightkiller7 (142), redshirtsmith (142), rrdoranski (142), tongo (142), valim (142), WDJ\_hnu (142), Aflisun (141), bwellng (141), Callaldo (141), Coibhneas (141), DIA\_WADER (141), garber2007 (141), harmonytrail (141), jlb10202007 (141), JonBiding (141), mkmooney (141), Nysha2 (141), Pheoria (141), Rappidennis (141), rharsh (141), rontogeny (141), Sheef (141), tvanevery (141), zimmy (141), beedon (140), benjuthula (140), cmooney (140), curtiswarner (140), dale\_cooper (140), jojo54 (140), juschka (140), kroonr (140), mabb (140), marielofish (140), s3av8r (140), shj00612 (140), smmiles (140), TimAllison2014 (140), 1044346840 (139), amerik5589 (139), audreyreale (139), bschroe (139), BushekOkruszek (139), dave (139), Emirald (139), gnswo7004 (139), grannymorph (139), jalexander (139), karmidee (139), lee8330 (139), Lilas (139), lilyshield (139), MeeMee (139), oilyworm (139), dadandsons (138), DmitryMalkov (138), glaciall (138), kimns84 (138), lsw1675 (138), maciek0899 (138), marianne (138), meowzilla (138), Momster17 (138), penzor (138), RadkaB (138), rux (138), yoongsl (138), cheet50 (137), Crounus (137), dalbrecht (137), DUPPY (137), ewylder (137), eyespy (137), kimaroduke (137), lorant\_j (137), mayad (137), medievalman30 (137), opirnia (137), rayjay (137), romses (137), sojo98 (137), sqrt11 (137), willaford123 (137), x9q9c (137), ancarius (136), anderdotter (136), ccline31 (136), dannyluis (136), gabriel-lecanada2015 (136), ilu2forever (136), isaacmanjr (136), junnychan (136), lanmy (136), natebot88 (136), polly1600 (136), setenia1004 (136), shammer (136), thunderbolticon (136), visualysis (136), bleefchen (135), boomod (135), broc93 (135), dani.stormborn (135), denisehigg (135), dreadcat (135), evin (135), far1a (135), GoldenMela (135), iado (135), kingn8 (135), krupala (135), Lippi86 (135), lucascacco (135), MissMilou (135), qkdn195 (135), southcoaster (135), vertigo004 (135), alicia\_11\_11 (134), DemonLeecher (134), etbebl (134), Gi (134), hannah123 (134), hemlokk (134), jfgariepy (134), sap04182 (134), tmeekins (134), turambar (134), brodavii (133), Chapmmac000 (133), donovanf (133), ducktorwho (133), Jijemma (133), jinki88 (133), kate2709 (133), L3nny (133), PetrB (133), rosiekg (133), shackley (133), yoki005 (133), 224590 (132), 5liwomir (132), andreazap (132), BlackhawkWhovian (132), blizzard (132), bo2913 (132), Cumol (132), falron (132), Haku\_Temaki (132), HinunC (132), JPD (132), karlokasupovic (132), lewisishere (132), mooner01 (132), n8ivehomeboy (132), oroko (132), red1473 (132), smp2578 (132), zynqlet (132), AleTes (131), cballantine (131), ccrowe (131), CrashxD (131), Detrius (131), fmgp (131), Ipppolit (131), jillill (131), kab (131), lorschur (131), miryrdian (131), nobillygreen (131), OliCol11 (131), powrow (131), saksoft2 (131), Schattenfix (131), tecnalialia (131), tigrisdyr (131), tranced\_boy (131), YanTayga (131), 19940205 (130), arc330 (130), billyG (130), Ceri (130), dltdkdn0123 (130), EugenePark (130), jigumok (130), lcallan (130), magicispower (130), mrreh (130), neko (130), proxen (130), superdopamine (130), thinkertank (130), ticktockdr (130), vkudryashov (130), adamzoller (129), ben.linthorst (129), Berbasik (129), brandeewyne (129), cescaspecs (129), Heidi\_Kit (129), je\_bailey (129), justinjun (129), kgjeffers (129), lifesflight (129), mrmuh (129), mysticol (129), shiloh99 (129), shocked (129), big\_behemeth (128), bmuczynski (128), Bouchee (128), dkstndyd99 (128), edxser (128), eng0401v (128), film8ker (128), hooveszimmer (128), itzkha (128), jdrewhill (128), lajake (128), mldev (128), mommafox (128), phatsonic (128), pieman067 (128), pk85852 (128), roma0104 (128), so8740 (128), stacielady (128), taryntelle (128), agentkatamari (127), akdptmxmfh2 (127), eofd77 (127), gahuul (127), hbtr (127), huni9918 (127), kaleidoflowers (127), khayakka (127), Killstr3aKs (127), lindskins (127), namg (127), Owner2105 (127), PeterEpicurus (127), pilnpat (127), robelmer (127), zaptzupt (127), Abi (126), ashleyhoop (126), ceeDo (126), CobaltZeroni (126), girliegirl1991 (126), jayreplay (126), jaywillems (126), Lalala\_22 (126), lasc (126), leogarro (126), marinazannoli (126), Namekhan (126),

TheFluteCat101 (126), X0RR0 (126), yym665 (126), zuyeg (126), Alex3d (125), apuzom (125), cajak (125), hyeonjin102 (125), jez\_moffatt (125), kim20170 (125), M.K. (125), Me2play (125), Proctorctor (125), rustynissan (125), shubadee (125), skunk12 (125), annyul (124), bobdangit (124), cirbi (124), dillyo09 (124), dinkin (124), erebus (124), hailee (124), hodari (124), karlo (124), LunaSquee (124), mystic6314 (124), natxo (124), paul\_wilkins (124), pgaiv-oronski1 (124), rafaelag (124), randonneur (124), Roswitta (124), Urban\_ninja (124), zimka (124), aaaaaa2 (123), brendanmurphy14 (123), dhzja (123), elcamacho (123), grimjar (123), jeunekim (123), jhabibi918 (123), leeseongmin451 (123), mapio (123), oholoch (123), pepi (123), pinkuh (123), ronno (123), SharonVJ (123), trashcan678 (123), xyloth (123), bananafett (122), Bohdzik (122), bozzbozzbozz (122), Crovean (122), Dendros (122), isaacsonb (122), mintyfresh (122), saicopathy (122), shy960306 (122), Silaxe (122), silverfntl (122), star\_kwafie (122), Teepfluecker (122), ttothejr (122), yuma93 (122), aesguitar (121), amandaclawson (121), blood (121), carolely (121), CRACKaWRINKLE (121), creaorde (121), danielbrain (121), deadReaper (121), diamond27 (121), FuzzyChang (121), hanaa (121), KMat (121), lander12 (121), lemmert (121), lrads spinner (121), Lutinka (121), lutukor (121), pallzoltan (121), pamjorgensen (121), robertom (121), sabrrrrrrina (121), stasis (121), stolfa (121), swathawk13 (121), tamires (121), yps12489 (121), andreia\_melo (120), arob6543 (120), au70 (120), CatGeneralX (120), drulludanni (120), hikaru755 (120), kahlo007 (120), Kennedy24 (120), knnmnn (120), lockbrake (120), MAKO (120), Manago (120), ManuH (120), maxtheman36 (120), mdefilippo (120), mjlachman (120), msiq17 (120), rayzer59 (120), secondlawlife (120), siroderab (120), stormkind (120), tmdgus0577 (120), vdruhe (120), wheel0522 (120), xblanque (120), zibbin (120), abotz (119), annamatsen (119), aregan (119), atomicc (119), chrzaszczyk (119), JohnKnust (119), JohnnieDough (119), lau2wr (119), lydiadoodah (119), playmoarnow (119), rafgar (119), rytash (119), santenna (119), sharpie (119), sqyguy (119), stutz.a (119), trudeg (119), willschull (119), Ajstein (118), alloza (118), Aurild (118), brioshell (118), brodosh (118), cheesemonger (118), chipbuddy (118), dsandbeck (118), grehy (118), happyphysicist (118), humphump (118), ipelletier (118), ivanlargo (118), kyle90 (118), lodorf (118), mirandagavrin (118), mphurley (118), mrtaustin (118), nicksuh (118), oomv (118), sisterscience (118), tyvole (118), vinceyun (118), Woolfey (118), zang1999 (118), aise (117), clbriggs (117), EileenBernadettAdams (117), GunnyWaffle (117), JeNNer247450 (117), jorge62 (117), knw257 (117), loverofcookies (117), loversk (117), mephibosheth (117), navaah (117), noobuster (117), Paju (117), Phil98 (117), selenaw (117), snogo (117), violagirl285 (117), abulubia (116), akago (116), emsabo (116), epicjcd (116), fffffrank (116), fmoritz (116), heisong15 (116), nayk2000 (116), pewwer42 (116), romansv (116), uchobzowe (116), wolfspirit (116), beebie (115), bigmike505 (115), curiouscatlearns (115), danielle\_taylor (115), ebete (115), elga76 (115), foomp (115), goznorlives (115), gtkang (115), harm1995 (115), jyj5028 (115), legilimensmaster (115), mkuw (115), nr1creeper (115), replexi (115), robodon (115), thekla (115), ANDRBE (114), andyaltom (114), donwokas (114), Due (114), fbtjdfyd5623 (114), goduck (114), hs0724 (114), iglified (114), IronWhale (114), Jacrosand (114), jimin5592 (114), mephisto1808 (114), mrbushido (114), nilesdavis (114), Seraphina (114), thetallmr (114), tmddh47 (114), tusienka (114), adelso (113), altkay (113), dayday246 (113), dennissohn (113), eragon1992 (113), esashby (113), jezoskoczek (113), mattiebiniek (113), prasanna (113), risa7911 (113), sahanag29 (113), smssom (113), wazziecat (113), weedbro (113), aokare (112), ariverr (112), averagePegasus (112), batelfer (112), cake91 (112), Coconuts44 (112), daisy41688 (112), Dart (112), Entmd (112), foxlock (112), gaina32 (112), gorioion (112), gothiklezme (112), grimgoblin910 (112), kerrygethere (112), Maerlex (112), mdiener (112), moonsoong (112), multifranta (112), plades (112), pocketmilk1 (112), sk940823 (112), teratologo (112), turtleshen (112), 1073482155 (111), Allison1107 (111), amskidoodles (111), danserig (111), dskrzypczak (111), emosso (111), Floralyne (111), Goran\_Che (111), greenbean (111), honbiogfe (111), jawnyh (111), khrysoar (111), kuzvo240 (111), luba (111), luhall (111), lukkohl (111), matrialeagle (111), melonbread2 (111), Potok (111), rayham (111), shibumi (111), skagnsdlekd (111), thecrimpdude (111), TheStatPow (111), tushon (111), yoshiko (111), alsrb0412 (110), anti-toast (110), bkbolli (110), bluu (110), burakbal (110), conchacatalan (110), Cromag (110), dec\_60 (110), doctorgrande (110), furazzz (110), Jazoray (110), klhouck (110), LaserHammer (110), leech (110), lenhawk (110), neolazaro (110), neurax (110), nilabh (110), omen (110), Popi (110), prokirua (110), roman0 (110), safetythird (110), shellybelle (110), smoores (110), thefadedseraph (110), toasterbell (110), akujou (109), amblingpilgrim (109), beccarooz (109), catywompus (109), Chappy1978 (109), DeepDragon (109), dude777 (109), EricP (109), industrialrobot (109), jagoandlitefoot (109), johnmaxwell22 (109), kanter (109), kolefun (109), Makodragon (109), marina1 (109), marticzka.nowaczka (109), MikeNGarrett (109), mtsus (109), nikolay (109), pbrant (109), rcjenson (109), rcullipher (109), shfkdroal (109), skreed (109), sprlm (109), spyrox (109), Taelevex (109), yovin (109), adamrutsch (108), Alasse (108), ashutten (108), beachmom236 (108), copasetic (108), frankhold (108), glv3up (108), Hoodwinked (108), ikarus (108), jochicken

(108), King\_IcyCube (108), ktecope (108), leejerrett (108), Log (108), lsh0124 (108), lsprott (108), lubaluft (108), mariegaye (108), negrny (108), sleepy23 (108), thable (108), wave\_327 (108), XCaju (108), xyztu (108), yoyotow77 (108), Zuz (108), bkahn (107), bluman46 (107), cornford (107), dmswn0612 (107), drodesign (107), emersoj (107), gucruqu (107), h31180y (107), jong0576 (107), kanthon1 (107), kiksn (107), liegogo (107), maty42 (107), mfgrossi (107), michbell (107), MR (107), msblue (107), notprocraft (107), pixystickpixie (107), plustar09 (107), Sebas8 (107), smb4122 (107), spiral (107), tomuck (107), toradiogenes (107), wnsehd0307 (107), wwkudu (107), Yuei (107), zUuuuza (107), anabelearte (106), Blaze (106), bommies (106), elephantrx178 (106), faktuu (106), friedchickenhawk (106), gailmackin (106), hannahrcoles (106), Sekik (106), sgion (106), slasher (106), vboy97 (106), vitalensis (106), Anna24 (105), annip (105), Baiel (105), broken (105), FlippingonVHS (105), huganticman (105), kisuklee (105), larsmars (105), legrimp (105), marty\_pl (105), mdailey (105), MengmengZhang (105), nooblettwo (105), norbs (105), Purr25 (105), Rutrus (105), Saumitra (105), sudonym (105), 5000people (104), cacathepira (104), compac (104), deehok (104), densimeter (104), dlwnsWkd97 (104), doxikal (104), eolay (104), eriael (104), honbioNFu (104), jimmy.hsueh (104), ljcarver (104), MihaliTzetzis (104), misha\_zybin (104), mmirranndaa (104), moosesmos (104), mountaingirl88 (104), Priam (104), shikayo (104), shmek (104), sophia08 (104), Sorick (104), sunsetbay4me (104), swiftjeff (104), timoyo (104), wdicio (104), aldridge517 (103), drand (103), elz05001 (103), hhh2303 (103), jlm (103), jonca374 (103), Joycefungo (103), mevlana (103), pjhgeneral (103), rosbe880 (103), saharantea (103), smili (103), tenyks (103), williawa (103), ahrwjdgs666 (102), amyleighkimble (102), banas (102), ben4242 (102), bestanyol (102), Captain\_Kirk (102), dcliffor (102), dlwjddns5 (102), hamyqueso (102), henric (102), kwangsin (102), LuisMDejesus (102), marti3534 (102), oopatorium (102), petels (102), pieceofjelly (102), pragtastic (102), skull43 (102), theuglymonkey (102), twarning (102), abross (101), anaraju (101), Bacram (101), Choco31415 (101), dlt-nwl0935 (101), DrFox (101), evanilssen (101), ibul0000 (101), Minokiller (101), monstermunch (101), Phythocaps (101), Povnain (101), sheep1 (101), syliva (101), tossefar (101), WeeIlya (101), appetit (100), benreeves (100), DaddyPhatsax (100), drcool (100), Extruder676 (100), griet7 (100), imke (100), jamilegc (100), Kaibil (100), KOB (100), kuzminski (100), kyuubii09 (100), linorn (100), nykkole (100), omidbarcelona (100), OneUniverse (100), overwatter (100), Psinka (100), Rorybell2000 (100), sethbrown (100), smgcat (100), T3rminallyCuri0us (100), 0923yunhee (99), audrla2 (99), awcy (99), cacacat (99), danielmiller91 (99), DanielTheManual (99), diannajamgochian (99), dmb0000 (99), ghceotto (99), ghesslen (99), indigospin (99), Jbetten (99), JCNoh (99), kopcik (99), mariellaellan (99), marydalman (99), matttt (99), McW (99), metatron (99), mordodirosa (99), pascallev (99), qkrwpgis999 (99), sabik24 (99), savvy (99), sgaffin (99), socialuprooting (99), tomy515 (99), yoonah423 (99), Yarin (99), A.Quentin (98), beckes2000 (98), colin\_every (98), cyjing (98), Falconcepts (98), gokuzzo (98), hyeon903 (98), iceriver (98), Invicto (98), kiloquad (98), LordMaryhill (98), mariaiglesias (98), mayadesh (98), mjollnirna (98), nashira (98), oldguy (98), pastelparasol (98), rockcoinman (98), rwon057 (98), xxnornlegendxx (98), Agroshadowgoddess (97), alliballi (97), Arlelka (97), bbmt (97), byggvir (97), curious30004 (97), danielkutsovsky (97), dapyx (97), ekostantin (97), flsh0401 (97), gghar1 (97), ikl125 (97), jlee352 (97), lemurs (97), lshultz82 (97), MarcSThe1St (97), midodong (97), overk1ll (97), peww-pewpew (97), qdev (97), Quantumflexgate (97), rainwind2010 (97), randomlogin (97), redharp1 (97), sars525200 (97), a\_profis (96), abkfree1 (96), adityamrao (96), anthonykis (96), aretas112 (96), Athina (96), baxter (96), becjacks (96), carimarvelli (96), coherent (96), couronnedechine (96), DarkZero (96), darrrrx (96), DMAuduit (96), dedefinal (96), FD7e (96), ghi06064 (96), Jpassionforknowledge (96), kjw159 (96), kraken1912 (96), lemUNET (96), pytonc (96), r000t (96), starzuny (96), strange (96), TeoDumitru (96), timschon (96), aimee\_geewhiz (95), arehman2015 (95), BlueMagnum (95), Bookworm31 (95), bravd (95), ch40z (95), cmbarnes (95), crisscross (95), Darthkira (95), epinephreak (95), Ererexiue (95), Garamond (95), gpack (95), kbonnell (95), lavs (95), Lyrialtus (95), marsha93 (95), mc2co (95), mekkinn (95), mkingbot (95), MM1nd (95), nds3 (95), nurtwalder (95), pmthomson90 (95), qkr-lans00 (95), shahj6 (95), sunshineonme (95), taeheonkim (95), The.Painter (95), valdemar (95), WantedDonkey (95), ww1225 (95), apfelalex (94), Arsou (94), avatazjoe (94), bebopdaddy (94), beccac3 (94), biyobi (94), bombardino (94), cars10w (94), CoenEphtein (94), deadlink (94), demerzel (94), DrCooper73 (94), drguerreiro (94), everazephyr (94), FormalPeanut (94), frenchkl (94), ftou (94), herbertg (94), HubbaBubba (94), IRSmartKittyz (94), jarisman (94), JeyTee (94), jw.welsh7 (94), legrandchef (94), lorisiro1 (94), mgmonster (94), midaslee (94), Mika83AC (94), misoir (94), NEITRAL05 (94), Neuronotic (94), openathec1ose (94), pamela\_plowman (94), Panarbus (94), pc31 (94), peters345 (94), pgrosskurth (94), spagls (94), stabelkar (94), Thale159 (94), tiffy303 (94), tingurgur (94), Aberro (93), akineo (93), auburnboy19 (93), bogdan1234 (93), bunny087 (93), burlappasck (93), CarlCong (93), chebe (93), claytonicus (93), cordi (93), cthackers (93), dokluch (93), gamez7 (93), gxxl (93), hanskar19 (93), kapati (93), lis-

sajour (93), marduch77 (93), Mike13108 (93), mp662002 (93), nkaragas (93), noltron (93), p4ymak (93), poxpxd (93), ranamok85 (93), s0nia (93), shedifice (93), TomasMihalek (93), up9393up (93), zasteva (93), zebanon5 (93), akabella (92), aweinburger (92), bbctol (92), blubbl (92), diggyb (92), Emmsii (92), ender2336 (92), hob9084 (92), incandenza (92), jamiedena (92), Janovic (92), Johns537 (92), karachung (92), ko.D.templer (92), Lucinde (92), Maplex (92), markiplier (92), mbb480 (92), nsanchez (92), nyankoro (92), physjuggler (92), Rhyto (92), sackbut (92), wasai (92), willgray (92), ZuzkaBu (92), CTRMa (91), Devablack (91), dracttosh (91), fmmaroto (91), harmonicquirk (91), Hconway (91), IanBertram (91), jeremiel (91), jjackyung (91), juano1979 (91), jweed2000 (91), kjutic (91), lchee5090 (91), livphe (91), luminousleek (91), marc.millet (91), memlovebubu (91), MickyC13 (91), nick914 (91), rahiensorei21 (91), rhazha (91), rico3967 (91), rottie (91), SaraMasarone (91), Scaedura (91), Simondry (91), sleeves (91), tarolrr (91), travisdanjer (91), vballmin (91), wjongchan (91), zhaorsan (91), aleksandr (90), burgerhex (90), Cblue612 (90), ccg71584 (90), engrjones (90), good42n (90), Grzesieg (90), hdsoftware (90), howarethey (90), icotton (90), jarnobol (90), kendraw (90), kst717 (90), lgorby (90), lipovskyc1 (90), mrderpton (90), oceanhappy (90), phaggi (90), Swechhya (90), szhangjerry (90), tmdfh126 (90), twv700 (90), Tymancer (90), vinartus (90), zhiang (90), aimosan (89), amdou4 (89), arcage (89), bejezyk (89), constantvariable (89), dan4ern (89), darval (89), drawyks (89), drspatula (89), dumbbuthappy (89), eros\_is\_here (89), estebanwhitmore (89), GDwarf (89), goalberg (89), greenleaf (89), happyleptic (89), heskey30 (89), honbioaca (89), IncomingAwe (89), itsorigin92 (89), jlaffin1021 (89), macinenterprise (89), Nekonata (89), Piepie (89), seanmcc (89), siny83 (89), StealthAmoeba (89), tmantookie (89), woahzelda (89), 3yeWir3 (88), a.dernbach (88), anglerfish (88), aSyndi (88), bebop87 (88), Coconut (88), csqsiew (88), dalgaier (88), dlsucm (88), dlwnsgk8 (88), eventhorizon44 (88), goaqjrj123 (88), godsmith (88), hara55ment1995 (88), jlehman (88), Kabeb (88), kevonni (88), Mamarok (88), mango6298 (88), marcoriccio (88), michu68 (88), Petrosyan (88), pneu486 (88), Reds (88), riddesh (88), Sci1017 (88), scottq (88), seatsea (88), she\_khan (88), supercritic (88), sweethawaiigal (88), tamagochi (88), templarhelast (88), threecee (88), Trumpeter95 (88), Vanillahobbes (88), zenter (88), andrea\_gonzalez (87), apoljeck (87), augegi (87), bandg8t (87), bblakesley (87), buildorder (87), dorotea (87), Drida (87), dubiah (87), esthercy (87), giggibuff (87), hattmannen (87), jeptha (87), kimjishu (87), kronkogla (87), Lensky (87), Link\_N (87), lotte2001 (87), magicfbi (87), mehIXIX (87), mingalway (87), mountaingirl (87), murcielago12v60 (87), nadamucho (87), P.holland2001 (87), QuixOr (87), sbayldon (87), secondside (87), Smaily (87), tonylee1998 (87), TyphoidJohnny (87), yhhh418 (87), amfiul (86), atuo (86), BigRed2009 (86), cju98 (86), cyherbst (86), dlcksthf87 (86), eatmorepickles (86), eloimartins (86), freddygolightly (86), JodiSox (86), ktiwirecat (86), Lawrence777 (86), maia (86), mcarper (86), myeternalmind (86), nayo (86), neuroptics (86), orzeu (86), padartmur (86), phrameda7 (86), Pin (86), priya2ndhour (86), RadekP (86), rikkes (86), ross\_caldwell (86), soesoe (86), sonixh (86), sung123 (86), ValRW (86), vnfmsnkg (86), a\_pache (85), afigigueira (85), alessandracva (85), avrame (85), bdtphd (85), birdy (85), bruiser94 (85), Byrnesfan22 (85), Cou (85), dewdha (85), golinger (85), haterswillhateme (85), hyenieeeee (85), mistercheez (85), neuronexplorer (85), nilsmoses (85), Ornau (85), ovan (85), Peperlito (85), pissette (85), pleeze (85), pphhaaadd (85), raeliena (85), red770 (85), ruppy (85), SAO (85), shalkai (85), shinsc93 (85), stutek (85), tiagosr (85), tsummach (85), tvanukas (85), wlsktm345 (85), xxpat3xx (85), yuhojin2000 (85), ArcheDemonm (84), berkebilea (84), cbeheme (84), celiaw (84), Cephalopirate (84), chrisg (84), doogendoog (84), erz (84), fenio (84), fnorx (84), Frestil (84), gnugnu1991 (84), GuyInkognito (84), heinzHeintje (84), jgabbott (84), jinxie2300 (84), joker1452 (84), kjmaeda (84), knextperson9 (84), lambdaofgod (84), lhollis (84), lobschta (84), malaclypse (84), Matzellus (84), mazdai (84), mbullard15136 (84), mshill (84), n\_hyoming (84), Nasuh (84), natcal (84), orlcert2k (84), papower1 (84), Phalfly (84), seidi (84), sirpago (84), slash0117 (84), tav1 (84), Thomkater (84), xcalibur978 (84), XpowerX (84), zorgster (84), Zsuri (84), acrab3 (83), algestaltzovisions (83), anneloef (83), aurelcov (83), box213 (83), brreee (83), brutaldeath (83), cajungypsy1971 (83), Cherie\_Kim (83), chrisfan52 (83), cnemo (83), doyaa08 (83), Drragonslayer (83), g\_huffman (83), GoingOnExtinct (83), gundisalp (83), ivakovka (83), janelane (83), jayman (83), jcdude (83), jeross (83), jjlove110 (83), jovan (83), kokiito (83), lfouquette (83), mhouser8247 (83), parandeful (83), polardragon (83), qwertyqwerqwer (83), rpeak1 (83), Spyrix (83), vandringsmann (83), OWMEDn (82), brothauser (82), chaotic033 (82), charlesp (82), copperflame (82), Crazy1212 (82), dji411 (82), esonghori (82), fylc (82), geek2nurse (82), healthinnovation (82), Isola (82), jgleach (82), jzielke (82), kingsas (82), metalstorm (82), nanchojang (82), nias (82), Nivox (82), ricknance (82), rkapur20 (82), ScalingLab (82), soyezzen (82), zzz6636 (82), aabart (81), ah500 (81), amirps (81), baxisblue (81), benizzio (81), bobattp (81), daibach101 (81), dangeresque (81), djgramps (81), EndlessEtude (81), ferretxing (81), fiaback (81), finotin (81), fossi (81), gabriela928 (81), gitsum (81), Griso (81), janjin (81), kapt (81), kathrynp (81), madalina (81), marii1111 (81), markluffel (81), merndathetenor

(81), morwin (81), mreitman (81), mrrich253 (81), murphy\_brain\_2 (81), naetle387 (81), onlysonofjim (81), outkast3 (81), Peaches\_1899 (81), Phlash (81), R.DataSoong (81), SilenceinExcess (81), the\_ham (81), TmoP (81), Wyimagine-wana (81), xertal (81), aaronado5 (80), Aavernia (80), azeiku (80), biksmith01 (80), cerberusd (80), chenghaotsou (80), chrishaleoxford (80), Cr0w (80), debug (80), DodamTest (80), elcolega (80), ewazlozlo (80), grin0315 (80), Heywoodna (80), highnone (80), HolmesSe (80), jeshar15 (80), JKG0d (80), jy21 (80), km12345 (80), mchughes1 (80), olbscherer (80), pierceh2 (80), psrabun (80), redsunz (80), rodpena (80), Sigi\_g (80), synes (80), TM (80), transience (80), wrighma (80), Zareyja (80), alby\_baroni (79), AMAT (79), anaikahas (79), anefallon (79), Aww (79), Bibou (79), Blekkspruten (79), clealz (79), davidccc (79), deana (79), doglive (79), enc (79), Feax (79), jkirvbro (79), jkut (79), jucapatinho (79), jun001188 (79), justdakota (79), kchare2 (79), masquerade87 (79), mcroning123 (79), mrm0205 (79), peelib (79), pinkitty (79), poyobee (79), psychick (79), rafallipnicki (79), salilly (79), sgy3151 (79), shywdp (79), sleung (79), stemcell8 (79), talos707 (79), Tantle (79), VeVeVe (79), vonherwig (79), wbrad77 (79), andreicimpoeru (78), calvis (78), convenient24 (78), dgdx (78), dherkova (78), ekyu5 (78), eylovesoccer (78), frozenfire13 (78), Geluemse (78), gonghaitian (78), hbride (78), heymoon (78), iball (78), jrj626 (78), JustinMS (78), jxtreme (78), kenmac (78), laurivan (78), leshe.07 (78), Lestad (78), lysiex (78), Mazz (78), MeadMeg (78), meduolis (78), merkator (78), mikkelsen (78), mlvart (78), modred189 (78), nofrete (78), nstokes (78), pajkeki (78), professor\_rotom (78), Ring3r (78), Riv (78), zombot (78), 171077 (77), air\_rock (77), almightyatt19 (77), anti0101 (77), arachnid (77), BirdsEye (77), carterch (77), cedric (77), clane1488 (77), degutant (77), eoin (77), Eunsu (77), frajl (77), frenchtrumpeter (77), hwiseman (77), intipedroso (77), kpa6uk (77), lucianom (77), nisanick (77), pats (77), reed (77), rzarector (77), some88d00d (77), terramarks (77), Toastington (77), tyjuji (77), Valerii (77), vncjstk9 (77), woker1993 (77), yadira (77), yjyj1023 (77), Zodi (77), ais (76), alfaridof (76), astoffel (76), austinmdillow (76), bmi24 (76), Cam4o21 (76), cdettmann (76), clarkphd (76), coffeeholic1215 (76), copantok (76), CTRmfr (76), cutepops (76), darthtomato (76), df910105 (76), DrGilgamesh (76), dwdjohnson (76), ElisM (76), erikito69 (76), frederic1 (76), GrzegorzPasek (76), gxm31b (76), gyuseol (76), heinermann (76), honbiojbr (76), Kanarek (76), LaurieMarks (76), LDVSOFT (76), NikaMD (76), phj\_1027 (76), rssandelin (76), sarahxtemp (76), spachib (76), takli (76), terathunder (76), tsty (76), vertigopolka (76), wizzer3 (76), xXLoneWolffXx (76), amstallings (75), axonbox (75), bach255 (75), bohne2k7 (75), carfas (75), choimeetsworld (75), deancolls (75), di2mot (75), dontsorrow (75), Elriks (75), hypertreesloth (75), JanK (75), jaquelinem (75), kseloff (75), lawrenqj (75), linkdeath (75), littleblitz (75), loskutov (75), lososjuly (75), matew (75), mattness (75), mouth2324 (75), mysterbee4 (75), roguencoder (75), snooke (75), stlbluesfan46 (75), szahra (75), tartavull (75), Terratex (75), twotontoaster (75), tytoscope (75), Ventice (75), wackydude1234 (75), Wulfh (75), 1206549 (74), amfische (74), caracole (74), connecter (74), danoran (74), davidsakry (74), domek (74), dylan (74), entropicage (74), hesperus (74), isavars (74), Keffy (74), kirasi (74), kirixen (74), laxwolf (74), littlestar (74), liveetree (74), mad\_broccoli (74), madidbel (74), maimmeermans (74), Noeska (74), Oliz001 (74), orioldbn (74), petr.p9 (74), remake7381 (74), ren1234 (74), Ryaan (74), saeb101 (74), sambba (74), sauerkraut (74), simonmijares (74), sirreginald (74), sivart (74), SLM (74), spudiotnz (74), stihial (74), thehoboclow (74), TheXzombA (74), Uendel (74), vedrance (74), wackelpudding (74), wjs545 (74), ysw0215 (74), 101454 (73), AdcelMV (73), atrev (73), atto2002 (73), Boon (73), boris (73), BrantLin (73), brittany\_head (73), charliet (73), chinga3 (73), damian1307 (73), davidmadsen (73), Drachinha (73), dungyull (73), iliebe (73), kat646322 (73), kissyoue (73), lingawakad (73), MarieGo (73), MeganCorkery (73), morgan1706 (73), owlgirl (73), ribak (73), sampo23 (73), Sarastokes (73), Schleiners (73), stari\_vincek (73), sterlwh (73), stevenkeith (73), strider907 (73), terato (73), Xlexpox (73), 658208 (72), alexalex (72), alucarda (72), AngieBerg (72), arwenm (72), beetiger (72), bernardosantoyo (72), brunkman87 (72), castius (72), delbat (72), dianasorocinova (72), Digky (72), djsketch (72), Dyrim (72), etbjr69 (72), finesswon (72), fryzout (72), FuzzyMonkey (72), ghanima (72), GillyWeed (72), glent13 (72), gmastick (72), hhourican (72), JessicaS (72), kiik901 (72), lady\_faelenn (72), liahn (72), liorci (72), luctino (72), marty1885 (72), MightyEvilPunk (72), ms\_j (72), Nautalus5 (72), OblivionWing (72), ogami77 (72), paola2796 (72), plunderpigge (72), psm3954 (72), rlxodbs64 (72), Sh4rky (72), sipoldovaz (72), t74159630 (72), tiwake (72), tj2600 (72), Tontsaster (72), wtw (72), zuska (72), zxtheo (72), a.r.burant (71), abellus (71), alisacrisp (71), aliwohlgemuth (71), antimon (71), Aryanne (71), awashima (71), bgale90 (71), bmander (71), buckets (71), carnaval (71), chippervak (71), colin\_urban (71), crusaderv83 (71), danielsan90 (71), darkmantid (71), dni (71), eavab (71), ehsansabri (71), emastrangelo (71), estherszesze (71), frootloops (71), jaytremain (71), jim345 (71), JustinYeom (71), kclairdelune (71), kiba109 (71), kimwipes (71), kohlman (71), kpaigr (71), kynex2 (71), ldods (71), lily1328 (71), mdiaz179 (71), Mewidy (71), mperezgu (71), mrbullhammer (71), namasch (71), ninatran (71), nootropic (71), Nresendez (71), ollieclarke8787

(71), pepperpot67 (71), ripstaur (71), sak3097 (71), scheu890 (71), sliki (71), tgjuyoung (71), TheDoubleO (71), VADER (71), wysiwyb (71), ysi0108 (71), ziam (71), abo1012 (70), alwa373 (70), alysha (70), andimia (70), anaek (70), Astronautka (70), baxterchem (70), bkrohlrn (70), brainmagic42 (70), btfrale (70), CaitlinAndJon (70), cremas (70), Crispin (70), D34d411c3 (70), DevoSomeTimeAgo (70), epistygne (70), everybodydancenow (70), exx (70), fgghost111 (70), glitch2210 (70), jalton (70), jhyun8318 (70), kgoz314 (70), krosenberg (70), madriana81 (70), MarekHaas (70), msully98 (70), MuhammadHilman (70), puku (70), Q314 (70), Roughoggy (70), rynnmac (70), Sabrinamorais (70), sarah.morejohn (70), Sarahlouise2 (70), selphiras (70), senseimorph (70), shdaneme (70), sintere (70), spncrgmn (70), supertomcat (70), susieqshoe (70), Tarikara (70), treaper405 (70), utama\_lim (70), ysh9142 (70), 0706sc (69), andy\_arg (69), anthonywuip (69), Artazus (69), Ashalyss (69), beatriz04 (69), byledojutra (69), catherinePouc (69), cistell (69), ckirkhart (69), ClaudiaCaro (69), cleverturtle15 (69), CountryHat (69), DBurmester (69), digidonkey (69), DisneyJBOO (69), Doughnut\_slayer (69), drag2012 (69), Egor89 (69), EyeJosh (69), ferronz (69), igomez (69), inc\_b (69), jesús\_dominguez (69), jhst3103 (69), karanedeff (69), KiraHewson (69), logicaliber (69), lpd0 (69), madman478478 (69), matty05 (69), melinmel (69), natekochie (69), Nebula1970 (69), niji9152 (69), Nobody10 (69), polskin (69), qweasd985 (69), ragu123 (69), Reamon92 (69), Rennikz (69), ryanhunnicutt (69), sagebrush (69), Shadowworld56 (69), spaztastic01 (69), Tassie (69), Teddy1 (69), therese (69), treeform (69), vehscl (69), wallhaywood (69), walkersister (69), Zensing (69), 2648cyw (68), ackengorp (68), Aclup (68), anch0vy (68), angie.wilson (68), atticwalker (68), Beatrice (68), BIL (68), booklover669 (68), chiky (68), chucklet (68), drashcovich (68), eiaserinnys (68), elanami (68), ellefletcher (68), EricTheEpic (68), exutu (68), faust\_viii (68), franciz (68), jbstuart (68), JHump (68), jjpyo1009 (68), Lavcia (68), MandicFTW (68), MariaArvanitis (68), niceguy55 (68), nom5407 (68), Ognum (68), person7474 (68), ProoM (68), qusrudqor81 (68), renapet (68), Rerezinha10 (68), Rittmeister (68), robertlarue (68), shstkstj (68), skeets (68), sunjess89 (68), xxxHal9000xxx (68), 4oveka (67), ajmille305 (67), animator (67), Axoim (67), bensokat (67), bethanw10 (67), bokutunoryu (67), darwinkim (67), dreyeball (67), ebeb (67), FaceOfIngo (67), felipesesso (67), Georgas (67), gjtnwls0817 (67), GogoGalway (67), jaysea2222 (67), jeffyh (67), jimmy01205 (67), joncastilho (67), julia\_zofia (67), KARMIN (67), katieoliver (67), MegaNanome (67), mghong90 (67), myteruya (67), never\_summer\_9 (67), ns\_neuron (67), pheonixblade9 (67), player9001 (67), reto (67), RiftingFlotsam (67), rtaylor2 (67), sabinu (67), soci0pat (67), stocco (67), suimugen (67), tagraf (67), tawalu (67), Thunderstrike462 (67), triana (67), VladCepesh (67), vperezma (67), Wazowski (67), xipo (67), Aigoni (66), alxmtz (66), asavosty (66), beccazhao (66), Bibi040690 (66), Braineses (66), cjdeakin (66), Crusher99333 (66), demogorgon (66), Dezkiel (66), dlatjdwns12 (66), elise\_borst (66), emmiyeh (66), facis (66), flyde (66), foshiro808 (66), hongdaeun11 (66), idatwell (66), impodracer (66), incrediblemouse (66), jbj1345 (66), jcueva (66), Kalama7\_AR1 (66), KangarooStew (66), KayleighM (66), kjh931216 (66), kjtay (66), leestyle25 (66), lempamo (66), lencs (66), maxsvetlik (66), mcap2001 (66), meanae (66), melbatoasty (66), meotide (66), MiCi (66), MindBlown (66), MiszAra (66), mmbritton07 (66), mogueta (66), MrRedd (66), osamc (66), pedestrian (66), queenlionhair (66), rabbit (66), racoongod (66), richwalker (66), rjcruz (66), robbisc (66), shamarock (66), smokeditty (66), stawiu (66), strannik (66), tcwheeler (66), thealchemist (66), TimHougland (66), tommypepsi (66), ywj97\_ro\_ceo (66), zednem17 (66), 14cucumbers (65), Avoidead (65), Aware1 (65), behimote (65), bela (65), Berylien\_von\_Herford (65), booivier (65), bugeyez (65), cellojane (65), cfegpse (65), chaines321 (65), DerMomo (65), dlvt52 (65), dnrs (65), eezhangchuan (65), eozdem (65), Fatso (65), Frank\_9901 (65), gage12345 (65), Gegenlicht (65), gmulder (65), grant00 (65), holly14 (65), holysmon (65), inbluemilkyway (65), InnerBushman (65), ivana82 (65), jack1845 (65), jmazella12 (65), jojo (65), joooeun12 (65), kaansami (65), krumkrum (65), Lemrick (65), luisneto (65), marinbiondani (65), miffed (65), mrswhich (65), MSLayer (65), nec22 (65), obscurusglacis (65), omrial (65), petiteagle (65), Phane (65), phoebefarr (65), reecer6 (65), rjwonlee89 (65), skforde (65), smcateer (65), soobin4483 (65), steveny (65), tam\_89 (65), Tanaqalt (65), TehLizard (65), tydomin (65), uforoid (65), wgtthompson (65), zigma13 (65), 0 (64), ad2673 (64), aelscha (64), Alphaetus (64), AP\_PSY\_Teacher (64), AR321 (64), AustrianRedBull (64), AyzanNightbane (64), beagol (64), beefytac0 (64), cdicarlo (64), crosax (64), Deemarah (64), Divyanand\_Rangu (64), elev (64), elizapoor (64), erikrl (64), fluffykitty (64), frmsm (64), gischa (64), grin (64), Guc44 (64), hollymaek (64), joebingley (64), John\_Giraffe (64), karenen (64), korthalion (64), Krimsi (64), lamia (64), leonikalan (64), manville (64), mefesto (64), meitaka (64), mmanierka (64), mmenocal (64), MrGeorge (64), MuggleDave (64), NeuroMS (64), nromano (64), OhWowFranku (64), poedipoedi (64), pwayne56 (64), RachelMM (64), rolandrock (64), rosieg (64), rumataEstorsky (64), scoopoo (64), se2p (64), Simbertto (64), skiba5546 (64), smgeissler (64), TheDragon (64), thinkbrown (64), tikkitikki (64), Tuchinsky (64), ussmine (64), Vinux (64), Vivre (64), wayward (64), weiredwired (64), wldms9928 (64), yyjin1217 (64), antharres (63), baldymyra

(63), blackbox (63), cheezydeeece (63), ciemnowlosa (63), Dorian.I (63), emja (63), fuzidave (63), gimpypy (63), gordovalen (63), Gully (63), hamburg (63), hendrix1968 (63), hmei111074 (63), jamiewoodhouse (63), jbolland08 (63), jvmm18 (63), katiem1210 (63), l0stintime (63), mhlovebj23 (63), milkomax (63), Miss7IC (63), Moochez (63), niksiv (63), nskynic (63), papaschlumpf (63), porterohana (63), rashton (63), robke192 (63), rozsaturan (63), rtclay (63), saragutierrez2016 (63), slapy (63), sophiagerje (63), special7701 (63), spex (63), t22hee (63), tattersmazenski (63), vivid4516 (63), Zikosi (63), 4onen (62), aculig (62), aldahry (62), beholder (62), bfishman (62), billt (62), blahn (62), bunnys106 (62), cabothedog (62), charliejaytango (62), cheezanator48 (62), Damian1801 (62), darthnader (62), daze\_the\_fennec (62), Didiutc (62), discofreak (62), dpath1015 (62), Draco6slayer (62), echangho (62), floju (62), frigg66183 (62), fuzzyninjaful (62), gajo0o (62), georgepowellpe (62), grimclimber01 (62), guruprasath (62), halo95945 (62), Hendorne (62), HenryH (62), honbiokjh (62), horakely (62), hyungeon (62), jdm (62), jingpeng (62), jinseop (62), katchya (62), kimbho (62), ksh262011 (62), lex (62), lientel (62), mieszkanka (62), millenniumb (62), moats (62), mobiusFlint (62), munoza (62), mycroft (62), Napis (62), nqtz (62), pdizzle (62), phobocstr (62), Pif (62), roberta.taylor (62), scidonk (62), Sesame (62), slutty\_socks (62), smophophine (62), soramkirtep (62), sungjun9710 (62), tobyac (62), troyboy4life (62), vnetox (62), wendytyn (62), Zore12345 (62), adrianbgo (61), Amylie (61), aristizabal95 (61), arthur91 (61), ashorr (61), banekong (61), bernardstopera (61), BrainWatched (61), brendan.scott (61), bush6984 (61), calvero (61), ChappleKCurington (61), chrismay (61), cialherb (61), creiser11 (61), current (61), dklaw (61), ducklette (61), elpille (61), herbertl (61), hj9749 (61), icenus (61), jessavamyn (61), keckert (61), kej3725 (61), kjhwan168 (61), kkwanggs (61), kmmichael (61), luxdiffusion (61), mallica (61), mikej565 (61), n1k55 (61), neufronter (61), oatmealjones (61), oxjox (61), pp (61), princesslolli (61), ptar42 (61), pylon123123 (61), quellei (61), radiosonde (61), rastaropnaya (61), retiredrunner (61), Reveman (61), rhdudqls98 (61), RosieRabbit (61), ruguero (61), sarahhm (61), sealtmx (61), sebi\_n (61), seharia (61), susan2012 (61), svinesh83 (61), tektrixter (61), tgall (61), thespike (61), tsampson2092 (61), vale83g (61), wretcheddecay (61), yoh974 (61), zh4x0r (61), zinniaflower (61), adelka (60), alectalcock (60), alexmadsen1 (60), Arc2 (60), beammeup (60), braincart (60), braindead (60), btrutt (60), BukinPK (60), cheswell\_jones (60), Cucumbersquirrel (60), customs10 (60), darkmoor (60), dbstjdals337 (60), egga (60), fancyppearl (60), gallifray (60), hemiptero (60), Iderlic (60), Jasmin1992 (60), jk06095 (60), johndf (60), johntheys (60), jsimmons0280 (60), karlts (60), kelty13 (60), kemon (60), Kevinx (60), kozi (60), Kurozakura (60), lanidia (60), ldh9999 (60), Liam\_117 (60), Ljos (60), maggie50 (60), Magmatic (60), marksalot (60), MogulDude (60), morganrose (60), ncabalceta (60), patriiti (60), possiblybipolar (60), primiinc (60), Purestone (60), pyromantiker (60), rjhsuper (60), sandiburnett (60), Shredarbayan (60), sloodefg (60), sotbs (60), stoph0 (60), taniabettis (60), thradriel (60), tkraemer (60), vickywu (60), VictorV (60), ViktorAbrosimov (60), WendyDerstine (60), Acalc79 (59), agat (59), agoldner (59), Alseh (59), ary\_star (59), batarena (59), big\_tony (59), bobjones (59), capsteve (59), caticat (59), ccabanne (59), CCoello (59), cogscimajor (59), CTRMc (59), dani1324 (59), dktiffls (59), donhem (59), eluxiver (59), gktns21 (59), gnarlson (59), izzy\_thorn (59), JohnLively (59), jole1222 (59), jrwaters (59), kimjk809 (59), kmingi8 (59), lastamor (59), Leexay (59), leonardo\_joon (59), lhj1034 (59), lunaman (59), maddeth (59), mainebee (59), Malina94 (59), mathematical (59), minase (59), my\_brain (59), mzswn (59), neurofrog (59), nkausar1 (59), number875 (59), ojs0620 (59), Omnipotent\_Ziv (59), philpark (59), rlftnw12 (59), rosav (59), scalene (59), Spirowitz (59), spunky11 (59), st0ck53y (59), synapse (59), the2038problem (59), timbuu (59), Tobi.as.egli (59), UkuleleLou (59), wiredanimal (59), wrenoud (59), 1046026190 (58), AgBu (58), ANETADIR (58), bbuldda (58), Bweniger (58), Chambertin (58), chocobamboo (58), ciqete (58), debnad (58), deniskako (58), dlgsauds (58), DouglasLaw (58), Eugene.K (58), fredison (58), gataca (58), Gilmar.hv (58), goshen (58), Hadley\_Flavin (58), haggimiester (58), horanzu (58), j2the2ndpower (58), Jaetbithaneur (58), janeeyre11 (58), jinmi82 (58), jv8 (58), kastox (58), kbdshadow (58), kuro207702 (58), l2840 (58), liesvdb (58), Lucius\_Seneca (58), LuSol (58), marchandise (58), marciofao (58), Missino (58), myk (58), Nadrews (58), northingood (58), oldskolperv (58), Panteras (58), parthcmodi (58), puranetto (58), rh240lds (58), saintboss (58), seefay12 (58), skipo (58), spenc217 (58), syphris (58), terryjohnshea (58), Timba (58), tylerdurden (58), varda222 (58), zeljko (58), 6alfalfa9 (57), AlchemistCH (57), Alya\_N (57), Angelorf (57), Blazing (57), carine (57), carlosadrianrivera (57), cEm (57), chigou (57), cyclonefan1990 (57), DaffyddThomas (57), dak3910 (57), duane3000 (57), ekhower (57), elenathumann (57), elleneb93 (57), Exonuclease (57), farmboytom (57), gkw0622 (57), gladier (57), gorl (57), gulum01 (57), haydenii (57), hextic (57), hscaraltelli (57), islaymaker (57), jdeblese (57), Jenasin (57), Jerawolfe (57), justhum (57), KathleenDoherty (57), katsavegan (57), kbirn101 (57), kimjhl12345 (57), kimtea72 (57), ksbarne4609 (57), lxhxdvm\_1993 (57), mannycansee (57), mathman98 (57), mcneilbj (57), Minuss (57), mordeckai (57), moosesudub (57), mqrius (57), mysticflames25 (57), newworld1226 (57),



physicsdavid (57), piematic (57), piergiorgio (57), Piqtka (57), pthcross (57), rnr\_bbs (57), rwhitloc (57), saracynical (57), sirus7 (57), stephearp (57), talmo (57), tharticus (57), ultramar (57), wolfgang8741 (57), xcplay00 (57), YNWA (57), zmtkdl (57), 2000200202 (56), adventureman55 (56), ahnsjoeng (56), akreid (56), alta080 (56), atarola (56), aumssk (56), banjung (56), braindeath (56), Cas (56), cnwalsh1 (56), cptaaron (56), crdietrich (56), dartman (56), daymonki (56), debmacaulay (56), deyanrashkov (56), dgon991 (56), dholtza (56), dmg04158 (56), Drackonian23 (56), dydghkdals (56), dzarmola (56), enkenadine (56), Gekasto (56), gjp (56), hadoth (56), HUANGlance (56), hyuan (56), jeowchoi (56), JLF (56), Jormungrandr (56), juuichi (56), KeireH (56), KellyHess (56), kong00824 (56), kris.baranova (56), KuraiKokoro (56), le0pard (56), leeyw1004 (56), lindtbaron (56), lubindent (56), lubos.odraska (56), Lunaari (56), Macncheezy (56), Manadh (56), meow22 (56), meyed (56), mlynskey (56), mtnutholme (56), Nel-lyEV (56), Nightworld (56), njmeluch (56), nnorm (56), noname77 (56), onlyone22 (56), paulolmedo (56), Philichez (56), ppizzo (56), protege (56), Puck\_Prospiero (56), reo468 (56), shalink (56), silversight (56), srhjk (56), sunnyside (56), Taffer (56), thinkthyme (56), Tony\_G (56), unehyeyun (56), vindurverndari (56), whqja3375 (56), wurk (56), Xorpsy (56), ZonaCat (56), Zuzeus (56), 5ro5ronyc (55), Abrodos (55), acmokeson (55), aleykate (55), andrew6087 (55), andy\_d (55), ashleinikkole (55), banziburger (55), benh79 (55), bestone0312 (55), Bhadri (55), billzhu (55), bugmenot (55), cdog (55), Clarpea (55), corvus1 (55), crewchick97 (55), CrispyBanana (55), dragon56 (55), dwpope (55), eardin (55), Earentil (55), eckmeier (55), error302 (55), fascistalpaca (55), FestinaLente (55), fishmegh (55), Flohritter (55), hamnegg (55), ijbab (55), Incubus\_Mirage (55), jasonthompson (55), javafern (55), joanne (55), jsink (55), jytou (55), kikkerlg (55), lalala1111 (55), lionni (55), littlepup21 (55), Locutus (55), mdcpt1 (55), mechlean (55), miguelangel (55), miles99 (55), moringotto (55), nerdling (55), Nibbler85 (55), Nick1 (55), nickh (55), NotJimmy (55), ominjort (55), Pepich (55), qowns8 (55), Quarken (55), rdlander (55), redospassos (55), rhuffer (55), Richardrespiratory (55), rjhunter (55), robcampbell (55), roro78 (55), ryanhood (55), SEWakefield (55), SkewsMe (55), SlayerTXP (55), smizr (55), sungjinjjang (55), Tamara\_Hall (55), theyankowski (55), tmarkzzz (55), Vandella (55), wkdu108 (55), xmaxx1212 (55), yanbeatmaker (55), yorknh (55), zmiklos (55), 955890 (54), advancecoder (54), agabi (54), Aidii (54), alex2 (54), alinefader (54), amwhichin (54), bsm2002 (54), chocmoose (54), cpierson127 (54), crezax (54), doodlefiend (54), dr\_ivani (54), dylan10202000 (54), Eldyn (54), Eric13246 (54), flowerkin (54), forscience (54), gdellema (54), gerade (54), hajben (54), hehehepsst (54), heisenberg (54), heptron (54), hunter315 (54), idokonex (54), isagolden (54), jander10 (54), jdthomps (54), jinoh67 (54), jjaa7105 (54), JxH (54), kallahar (54), kategans (54), keiana28 (54), kirjava076 (54), ladyyunalesca (54), lavueltaaldia (54), LisaSchNYC (54), lj9310 (54), macgreg0r (54), Malo13 (54), meghandecourcey (54), mingjaichris (54), mschell (54), Neuron\_Explorer (54), ninax (54), oun1104 (54), Petulant\_Petrichor (54), pkh1230 (54), qzwx1928 (54), Rogier (54), sandtsyn (54), sbliken (54), shiva1183 (54), shodan (54), songyenjjang (54), tachyon0212 (54), Tavitua (54), Teradil (54), tokimer (54), ub1k (54), Venus\_meow (54), vizerot (54), walwyn11 (54), Wingfield (54), winta641 (54), yeosj116 (54), Yuzenberg (54), zaphorthewizard (54), zlfldks (54), Zodiac3121 (54), 1066230368 (53), aeco (53), aleator (53), anguskelly (53), attiejack (53), beth\_framos (53), blueambit (53), bruno (53), cormath (53), davidivov (53), donald (53), dpfs21 (53), dsss9708 (53), edoody28 (53), eeconrad (53), Eing (53), erudite (53), griffinnowak (53), gungor (53), Hemco (53), Hephaestus (53), Hyeon (53), idonthaveone (53), iluvgodnlilach (53), inferior321 (53), ironreaver (53), Jeski (53), jmelvin (53), jnugen (53), jose\_troncoso (53), josune (53), kang80211 (53), lauren9611 (53), learnedhappiness (53), leyloota (53), m4jk (53), marius31 (53), matias (53), minsuzhang (53), mpop (53), mschiff (53), msnhotmail (53), mstarr93 (53), mtallman (53), nachowo (53), nexist (53), opynd (53), p0o9i8 (53), pcjump1 (53), Pini2013 (53), print2357 (53), RD (53), Relentus (53), retribute (53), robins (53), rolfsigrist (53), rshnaper (53), silverfire (53), sumpygump (53), tetrisd (53), themansyingstous (53), tlbrock (53), tmuhlen (53), Ubertramp (53), wandrake (53), wolframdioxide (53), woman (53), ZeidBenAmfi (53), aimeew (52), Albert\_Einstien (52), alexshark55 (52), AmelieKu (52), andfaulkner (52), an-thodean (52), artic (52), aryaconnett (52), bang\_ul\_i (52), blinky (52), bliu79 (52), bmsod (52), bos10blonde (52), ByteWolf (52), caller (52), Callmetodd (52), daniel5.7 (52), dinerian (52), dmoore (52), echolian (52), freefree1987 (52), gizzmole (52), gyok0 (52), honbioSWo (52), hoyagibebe (52), JakeSteinebronn (52), KatalaEnkeli (52), killamongaro (52), kosciej (52), kszechman (52), kyj97914 (52), lance23456 (52), lineeey (52), lionlady (52), LordZord (52), Ispanenberg (52), lyndseyannette (52), mahankala (52), Marval13 (52), McMasterslayer (52), MiRRor\_AtMk (52), ousunk112 (52), ragman (52), rfuller287 (52), Rolodzeo (52), sbhumbr (52), sdolot (52), sergbond (52), smelch (52), smjohns (52), soulpyx (52), Stephan.Gerhards (52), sunhyeong325 (52), tazzz (52), tbeardx (52), th0m4s (52), tvfxq1228 (52), wednesday13 (52), Woland (52), 2235822 (51), alexlovesmath (51), ardenise (51), avaxylon (51), babyuk (51), bbear (51), blizniak (51), cameron (51), campbellw (51), CarlosMJ (51), carolynbikesusa (51), casher-

man1 (51), cgoddard (51), cjscksgml (51), Cork (51), cvijo (51), daffymommy (51), dahha81 (51), Darek\_Wojtaszek (51), Denisdamenis (51), digital\_trauma (51), dillon101001 (51), dorminay (51), EliTheGreat (51), erikkire (51), Evintage (51), hakansyn (51), Hightower (51), hvpandya (51), invisify2 (51), jaem (51), jancajthaml (51), jankins (51), jess5412 (51), jmccllellan1978 (51), jmurray9497shop (51), JoannaP (51), jonathanzung (51), jovime2 (51), jozefdodic (51), jsilverok (51), keeperc (51), kellinger (51), kevinalh (51), kolinko (51), livelife2 (51), maby (51), marymag (51), melina\_1228 (51), MercuryPi (51), meteortrain (51), MikeS (51), missluce1 (51), neuroguru (51), Nicola\_Vynnitskyi (51), Nikht\_Revan\_S539 (51), nwarnke (51), Ob1 (51), orilok2 (51), poposhar (51), punion (51), RalphWhite (51), rmalla (51), ryanbispham (51), ryanfodder (51), sami.ghazouani (51), savva (51), scottjohnson3 (51), seburnett2003 (51), studentne (51), susansfb (51), tomiks (51), tryx (51), viper (51), Witgren (51), WolfsSkin (51), woof (51), wyskoj (51), Zombiepices33 (51), zyloo (51), abc2424 (50), acephale (50), afro2 (50), anzlie123 (50), askamexican (50), axon7 (50), Bananatron (50), caca9 (50), cairomcmillion (50), carlosdvr (50), cephalopods (50), chriskos (50), coolestdude1 (50), cronos51101 (50), derpquit (50), dizz (50), doublehoon (50), ds5bsb (50), DuckyDawg55 (50), eeswift (50), einstein0508 (50), enemycoke (50), energya (50), Erin\_A (50), geniusclown (50), ghatomarques (50), hurev1vo (50), Jack4321 (50), jaysongg071997 (50), jgaffey (50), josta81 (50), k9610023 (50), Kisworth (50), KleineMaus (50), kmilo.be (50), ldm1177 (50), loong (50), LukNoi (50), marc.norvig (50), metafictional (50), morgwyr (50), mpiotr (50), mrryanguy (50), nifboy (50), paintedeye (50), parcival (50), penandscoot (50), pfmd86 (50), Plok (50), plongs (50), quirksdk (50), Ramble (50), relix (50), rlushi (50), RyanLong897 (50), shooresh (50), sjbostian (50), skh7235 (50), soooa (50), Swagstag (50), taebawoo (50), Tastingcolors (50), tcq\_11 (50), TeoKoi (50), thelordoftime803 (50), thiefwannabe (50), toby\_baus (50), treehugger5280 (50), treeman26 (50), tvidebaek (50), wakanaka (50), wjdwodns8 (50), X05dusk05X (50), xxPowerxx (50), youster (50), zerachiell (50), zing27 (50), zoltan800 (50), Alexsnow (49), alswl2k (49), antikpopstar4 (49), Axons2015 (49), Blondegenie (49), CamdenMath (49), cavonius (49), clair220 (49), clouch0284 (49), coch (49), Corner (49), dani (49), davidj41 (49), DBT (49), dench96 (49), doesntrustbirds (49), doyourealize724 (49), drh\_w (49), dylanl (49), escapelle (49), ewemewe (49), ferkal (49), filipwolf (49), finvarra (49), geonhoyun (49), gertvdb (49), grucha106 (49), hartt (49), Hashino (49), hermitesan (49), javalava2 (49), joebachofen (49), judybruce (49), kandb908 (49), kea57 (49), kuku7851 (49), Laurens1311 (49), loothi (49), mamahenn01 (49), Martin30 (49), maynard.666 (49), mchoco\_ing (49), Mcrush (49), misterspork (49), mjz19910 (49), mlyd0647 (49), mrfuturetense (49), nefeli (49), nephyst (49), npatzlaff (49), penguin1234567 (49), plwervvv (49), pocca (49), Priit (49), rabbit\_993 (49), rkdalstn17 (49), rlatnrud0529 (49), russelldub (49), saderakki (49), sanson33 (49), seungw92 (49), shakamara (49), shinmei2006 (49), sleepingbag (49), sn362898 (49), Squirrel623 (49), surand (49), surfer (49), susan789 (49), swiggityscience (49), TugaSempres (49), tyaedalis (49), urielxvi (49), valo (49), viviphilia (49), vladimir (49), wls57023 (49), yilmars (49), ytak (49), 3119811 (48), aims (48), akinder808 (48), ambermoon (48), arley (48), arthener (48), ArthurD (48), ashrai (48), ashur (48), aynmara (48), baileyspace (48), batman142 (48), blakboks (48), bm24stam (48), ctirri (48), derfoxterrier (48), emikulic (48), ericdanman (48), EvilLeprechaun (48), extraterila (48), ezkleber (48), FriedCritters (48), gaeulkun (48), glitcher34 (48), Golemxyz (48), greenhair (48), hanmaldo (48), hapgood2001 (48), heathcliffe (48), highwoody (48), hodjeur (48), honzajbanzaj (48), Jaredzerro (48), JDPerez (48), jisunjung (48), jugero (48), kairos9603 (48), kaitlinleanne (48), kangseunggi (48), kkotbom (48), kotvi (48), krvb (48), laraa77 (48), maadnex (48), MasterBando (48), megaselvas (48), mgg996 (48), mimom (48), namnamcat (48), Naomi2809 (48), narmi29 (48), neuroscidoc (48), nfalceto (48), ngz (48), nietzsche (48), nixon (48), nnowitzk (48), NoEuro (48), notrocketsurgery (48), oklawm (48), patclement (48), Pauloscarello (48), ProjectHopeless (48), projectOR (48), Pyniewicz (48), quirkyneutrino (48), qwertylool (48), reginayeo96 (48), richpk21 (48), rransom (48), s3wonseok (48), shaman (48), sired22 (48), Sky\_of\_May (48), south14 (48), spart (48), tektech (48), TheInOnlyPanda (48), Thulium (48), tila (48), timgaines (48), Twi (48), vixenishdoll (48), vlippincott (48), vublt1 (48), yunjae0529 (48), zachdrum (48), aaronbrrr (47), abassi896 (47), alexbenjm (47), antlane99 (47), arthur92710 (47), aszx1973 (47), BenBaldwin (47), beoulf1719 (47), bsh2006 (47), CaliDrew (47), carneyh (47), changhyeon22 (47), ChloemoShaw (47), chty2855 (47), clarab123 (47), coldcorner (47), crmontel (47), cs54545454 (47), Dandelyos (47), Danica (47), david113 (47), davidandersoniii (47), Deemasique (47), echopapa (47), Echotroi (47), Elgoist (47), enterlms (47), giu\_19 (47), gottabcb (47), Hankyu (47), helter\_skeletor (47), IcedHybrid (47), icesage (47), Inkie (47), jacoby (47), jcoolidge (47), jkrinke (47), jmesteve (47), jo\_anne (47), Kedlub (47), kiwichick (47), KLBenson (47), kriss (47), ljhyun0530 (47), LukteDukte (47), matteowham (47), mattpreda (47), mdsegura (47), mht (47), Mihecub29 (47), Mio30 (47), misterbondpt (47), msk914 (47), natalie28 (47), nbajra (47), nightwitch11 (47), riah (47), rlaqqk49 (47), robmagin (47), rudfo5070 (47), Ryanspiker (47), sagaland (47), simon.townley (47), sk3erkrou

(47), Stockbrot (47), suckermug (47), tabby (47), Tarde (47), tashabob (47), thrakar9 (47), thutran (47), tnwnrl (47), tom3k (47), Uprzykrza (47), venya (47), Vittek (47), walterChew (47), wax (47), wiseowl14 (47), wogmdl12 (47), yarati (47), Zagna (47), zschuah (47), zwasp (47), Abeck (46), ad (46), agusblob (46), Airport\_Sources (46), andr5074 (46), Andre111 (46), AnimalGirl18 (46), apmontagne (46), arhailey20 (46), aron (46), Atomic\_Vender (46), aubergineish (46), barpop (46), bbarr (46), berenji012 (46), candrews (46), carnoldvt (46), cengiz (46), codylabs (46), Dandyska (46), defnul (46), devolved (46), DJELIRICE (46), dkd1xpa135 (46), dkulper (46), drvillegas (46), duncan (46), eoliver (46), Epoch615 (46), evans84 (46), evedoll (46), feellover1 (46), feverish (46), fiyyaxx (46), freilly (46), Fuzzle (46), garrettdetexas (46), Gric1805 (46), grimmjck (46), guido\_marcoz (46), haabermaaster (46), hunt (46), hyojirap (46), infinitebattery7 (46), j.a.r.o (46), jkmitche (46), jwhyb (46), Kennnnnneth (46), KJcatz (46), kjs8835 (46), kkgh99 (46), kuararo (46), kvfertig (46), L007 (46), lateraluser (46), limstift (46), markxd (46), matt.burchfield (46), mdb77 (46), mdmegill (46), meghanguillen (46), networkplug (46), neural\_lauren (46), nnaycol (46), nyxer (46), pdj2464 (46), plurgh (46), possumtail (46), pwilkins (46), QazseWsxdr (46), R4iD1337 (46), Rodd (46), satimotion (46), seok4793 (46), smirabi (46), so\_budd (46), Stemuli (46), sydnad (46), SydneySericolo (46), thejulian1507 (46), TLEH (46), tlock97 (46), tommy1 (46), toofredtocare (46), tweinstock20 (46), wert94 (46), whwodlr (46), yanshan (46), ycom1980 (46), Aerics (45), agraahams (45), ah0nen (45), akamnitzer (45), Al\_Dark (45), amiller (45), AndreL (45), awkwardnarwhal (45), az09 (45), bahti\_yil (45), baron121 (45), baronblack (45), beats (45), Beije (45), belinda\_l\_c (45), BlackDragon (45), Bleart (45), branch (45), bugamok (45), Bwright (45), chocokart2 (45), choihs816 (45), chung900618 (45), clarksnm (45), cuttlebone (45), dan6888 (45), dmorgan (45), doomyxx (45), echo\_2 (45), ecrane (45), emsworth (45), endermen45 (45), endi (45), enteis4 (45), eodudahs (45), firecake (45), gagillett (45), ggolden1561 (45), hskeum99 (45), indiggio (45), injoonh96 (45), jarad100 (45), jayanta (45), jbz (45), jchampigny (45), jchilln92 (45), JennaLowe (45), jennymcdonnell (45), Jet (45), jpfitz20 (45), jrossiter0 (45), jvanman135 (45), jwintx (45), kaku (45), kradul (45), kverbrugge (45), kylemath (45), lazysalmon (45), lemme (45), llamabread (45), MaciekB (45), majk (45), maxswiegand (45), mendorong (45), mugzyrae (45), Mydriaz (45), Nacaw (45), nachtrot (45), Nagare (45), NeloSolarus (45), neuronfire (45), Norboy (45), nunossunza (45), ok6140124 (45), ontherocks1 (45), ozkan (45), purephel (45), quackalot (45), qwerpony (45), raf3kik (45), rastdd (45), Robert200188 (45), robvv (45), s322194 (45), Saereth (45), Shyodan (45), sofo (45), sommon4741 (45), songsmith (45), sskram (45), syc (45), synap (45), t\_ran (45), t8ls (45), TheCakebuilder (45), tjgant (45), tutur (45), Veristeron (45), verstehen (45), viktorokh96 (45), weberrobert (45), weerman (45), Wiesio (45), YDTSZB (45), yxz (45), 10superstar11 (44), 4A85E (44), 7Lestat7 (44), aj1139 (44), annunciata (44), apz1021 (44), arodri19 (44), asienka (44), asjordan (44), avetoro (44), barbaradb28 (44), bash7619 (44), braziunas (44), CalebTheHobo (44), caos (44), ccarrera (44), cclapham (44), charalampos86 (44), christiantaylor (44), chriszhang\_34 (44), Connie\_Rab (44), cupcakesk8 (44), dalbatronix (44), dantheman1 (44), dqpb (44), eelloo93 (44), ehdw1se (44), garabombo (44), gborisim2 (44), gilgunn (44), Gingetsu (44), grantmcwilliams (44), guyvere (44), hippydogmx (44), imakemyownjam (44), Ixilion (44), JasonMPA (44), jerkstore (44), jsky (44), kang8021 (44), kekkai (44), kevinnoone (44), kolon (44), kshjlion (44), Lawa (44), leandero (44), lsherrod (44), maibar9730 (44), maketale (44), missbones815 (44), MrGrumpy (44), natalie (44), nickm262 (44), Nitjsefni (44), olsomari (44), quantumsilence (44), qwedc (44), radartrout (44), randomperson02 (44), rogercut (44), sikkert (44), simdo3000 (44), slyrth (44), smurfi (44), stateofmind (44), stroke55 (44), tadiu (44), thedirtyham138 (44), thunderkrieg (44), tlawjddus98 (44), tolco (44), Toshogu (44), tristanhegseth (44), waterexplorer (44), Wayari (44), wochi333 (44), xxspiralxx (44), Ziggah (44), \_j0hn\_ (43), 5522110 (43), abschrauth (43), AcidAlchemy (43), adamdisette (43), aegoodin (43), alexhemy (43), Almighty\_Jam (43), amouniverso (43), apollossp (43), badgerhazza (43), BeccaLeigh (43), bluecone (43), Budnoob (43), c7a7t7 (43), clairehomeopath (43), cosmig (43), d0 (43), dharber (43), dmm41313 (43), dragonite (43), emckenz (43), Emers (43), fae1eth63 (43), fear12 (43), foustian (43), frump (43), future\_fox (43), ggiesbers (43), googlegirl (43), gracethemace (43), hayesi (43), helenhh (43), Ironprostate (43), jdeschry (43), jimmyj (43), JonIronEgg (43), Jonyol (43), Josie01 (43), js1924 (43), karissa (43), kfeathers14 (43), kgviswatching (43), kingwolff (43), kndahmen (43), lostsamoan (43), Luft1990 (43), malinaq3 (43), Manjusaka (43), masula (43), mc940816 (43), mihaib (43), mikulda1 (43), mineblas (43), mistahg (43), mladen (43), Nimsy (43), orocnyo (43), oslan (43), Roboterbastler (43), rolladex (43), sandervg (43), sciencemsg (43), scr4416 (43), sctmutlow (43), seba (43), sebdu (43), SiMatti (43), sinecogan (43), sophie8000 (43), stingypanda (43), Superuser (43), syzen (43), Thora (43), tiffany\_cubes (43), Tobias4X (43), trasgu (43), tripp (43), vasanth (43), Visiondancer (43), william\_ries (43), wpicaco (43), zacjenks (43), zeezrom (43), zRamon (43), 16cello16 (42), 33gregg33 (42), 94518 (42), AEPS (42), ajmarkle (42), alaxbro33 (42), Amimaro (42), andreff (42), annamarie94 (42), AnttiP (42), apos (42), asperger3

(42), Avel (42), axyradius66 (42), Bertollo (42), BethMarie (42), brittney (42), cat78465 (42), cebellinger (42), chpzcc (42), ciapciak93 (42), cwr (42), d\_d (42), danenglish (42), dctucker (42), deadracoonman (42), Deprezke (42), didwoals2000 (42), Dohagen (42), dwd9927 (42), dyordan1 (42), elvetter01 (42), fayili (42), Filipinzo (42), gilgordon (42), gonzalort (42), handsofstone148 (42), hansw0326 (42), Henri.Tavernier (42), hkmjhkmj (42), humaneuron (42), jgreenwald16 (42), Jimbo12 (42), jnpy (42), jploughrey (42), js7767 (42), KarolisB (42), kimys0720 (42), kjhnoori (42), kkeravel (42), kkezir (42), kornison (42), Kyle.Wyonch (42), kylekelly (42), Isseckman (42), marcoragusa (42), MCJ (42), millred (42), mjnico (42), moai87 (42), MoonLitPixie (42), muadibi (42), musicalgal25 (42), n2cemoggi (42), nanguetta (42), nearlydawn (42), nichun0826 (42), Niquey (42), Octochutney (42), olawertyu (42), PavelBaturin (42), pbailey (42), plkey84 (42), qkrrk1230 (42), qoega (42), qowndo (42), raissa (42), river0 (42), rjsaul (42), rleo9015 (42), robz90 (42), RoyalLeaf (42), rpgallagher (42), scotte (42), sdrm (42), SHMLP (42), shorlan (42), soggy money21 (42), songwonjoong (42), sophea (42), sprout (42), swmiller (42), tfbandie (42), thetallestgnome (42), Thing201 (42), tmtmwowo (42), Tubanakis (42), uengler (42), vaijebyy (42), Vic2014 (42), vmacc0179 (42), vrihedd (42), wickstrom33 (42), zakzak97 (42), Zinia (42), zzaengc (42), ----- (41), 1cathystout (41), 4nushaak (41), agraceb01 (41), alexgotsis (41), alexi82 (41), Badly\_D.Turtle (41), baezchaolucas (41), Bruno\_Silva (41), bubba\_ze (41), CeruleanSun (41), claraarthaud (41), cochristine (41), CollinChidiac (41), colton (41), Cora (41), Cuprum (41), cyko (41), dolly.peaches (41), doogiedc (41), doomshroom (41), dydtjs619 (41), EagleBound (41), eric1597530 (41), eunseok (41), evie\_c (41), EvokedOne (41), Eyemaria (41), feral\_squid (41), fool1055 (41), gabbello (41), greenryu (41), hairyfotr (41), hale6 (41), hjekyll (41), holeman (41), honbiojle (41), honbiomoh (41), hyunryung (41), IngaD (41), Itchy (41), Izaet (41), jakko (41), jangustao420 (41), jeremyhansen (41), jermainiac (41), kassisto (41), katherine.bender (41), kethella (41), kouros (41), Laborratte (41), LiteraryFurball (41), matf2f (41), MdCt506 (41), mem523 (41), minchan7432 (41), Mirakha (41), mmMockasin (41), msbrandi1 (41), msutton (41), narvaezm (41), neosting (41), neurfur (41), ohho0728 (41), osboxes (41), pablo6michelin (41), patronuxjung (41), peanut724 (41), pennb24601 (41), pookie (41), pwc116 (41), samstanley79 (41), shtupnski (41), sseibert (41), sumizone (41), sviter (41), taenmap (41), tcpip (41), the1madscientist (41), Tierchen007 (41), tmjusto (41), torak79 (41), TYC (41), viledoll (41), vit-sen (41), Vovan (41), Watermelon (41), wdj135 (41), wmax351 (41), Wompking (41), zioJaR (41), 91695sh (40), aaa684907 (40), abehonest (40), achimt (40), Anastasia1 (40), andraelinus (40), anoopkulkarni (40), anthony2307 (40), asghar (40), AshvinNik (40), averylopez (40), becreative (40), bms1991 (40), brianjerden (40), brinlong419 (40), byro (40), Chad.McCoy (40), chungyuj (40), coleridge (40), cosmonaut (40), cursethewind (40), daniloh (40), ddor221 (40), df\_andy (40), dfsd23 (40), divedave (40), donaldrp (40), Dongbo (40), dragon7496 (40), dtribu (40), dysp (40), eg101 (40), eogl50 (40), eriator (40), face\_kill (40), freethesouls (40), ganandorfthegrey (40), garam5716 (40), gelflord (40), GMe (40), hansvandenhof (40), herodotes (40), hulksmash (40), IanMacDonald (40), ImAPotato (40), imsupercereal (40), Incorporeal\_Waffle (40), iwa (40), j\_moua (40), jk158 (40), johnkahlua (40), joshgator15 (40), juntalolo (40), kjefferis (40), kjonder (40), kpr99123 (40), ljjohnson013 (40), lovelovekise (40), lrsears (40), madde-lamoses (40), masha\_galka (40), mbaldi72 (40), meawoppl (40), Mihisa (40), mjj420 (40), monkeys4027 (40), Mrinx (40), msgolgi (40), muddy (40), muhib (40), Mulin (40), mygocarp (40), n7071243 (40), nankin (40), NatalijaLee (40), nathanlking (40), nfjmgndvsf (40), O\_GON (40), O100O (40), Obewoop (40), pgv0801 (40), piezing (40), r (40), redbittersweet (40), rhaeovh (40), rtu96 (40), samazingXD (40), samecoin (40), scottfoltz (40), SebastienV (40), sheetqueen (40), shoasianboy (40), siktiret (40), Simoh (40), slamb (40), soffee (40), spandexman (40), Spartycopper (40), spazzyorbit (40), spellsong (40), SteelDreams (40), sushi810 (40), thatguyyonder (40), thedrawkcab (40), tmd-wls5044 (40), tomskokna (40), tystadi94 (40), ulindi (40), verityoliver (40), Wawi (40), wiki4 (40), wiretome (40), wsudigitalwar (40), wyntaar (40), xgoingdownx (40), xinfix (40), yosh (40), Zedo244 (40), 0925sm (39), 88endless (39), Abfabjilly (39), aksin2010 (39), amrhoranieh (39), Anthony\_Lee\_Rice (39), asencio88 (39), ashcanpete (39), atsi05029 (39), beestro (39), benridley (39), beyerm (39), Braves (39), bricoles (39), cielreveur (39), COM3T (39), cranfd (39), daftjo81 (39), dahntay (39), davidshin (39), deividas (39), dhprince90 (39), dk (39), DOGG (39), donstim (39), dope\_soph (39), Dudelianer (39), el6500 (39), eprader (39), fibo (39), Fiks (39), fila1002 (39), fpaolo71it (39), gengwuyu (39), Ginster (39), Goldi (39), gosejin (39), grrath (39), HB\_swag (39), heather.russon90 (39), hewylewy (39), jakartadean (39), JamesTheFlames (39), jasch (39), jcppkkk (39), jhobohm (39), jimenj02 (39), JohanSpaedtk (39), Jupitair (39), kas5790 (39), Kelardis (39), kendrazema (39), Kit\_Kat (39), kittensandcream (39), kkyj98 (39), Kleny (39), kong\_k (39), ksh10401 (39), Lastknownposition (39), lenashally (39), LHeinrich6 (39), Lisa\_Teng (39), lomira (39), lwsmith98 (39), mahr (39), mallory123 (39), marksolly (39), mckilpatrick (39), meggie1496 (39), mstarry (39), murgatroyd (39), nadrimajstor (39), naratteu (39), narfle (39), nerfherder (39), nickanglin (39), nikklaastr9 (39),

nono5118 (39), NS05yw (39), nsteel22 (39), paul\_d (39), petrak18 (39), phantomtigre (39), plualdi (39), pmoulthrop (39), pvo (39), qwaszxpoklnm (39), rchrdrgr (39), robinindahood (39), Robot (39), Roigrin (39), sacht (39), scot-tjones90 (39), serendipity09 (39), Serico (39), shinighami (39), shucheng.tian (39), silverodin (39), simplicissimum (39), soldeen111 (39), sultano (39), suzyfromaptos (39), sweethomei (39), tadeu83 (39), tjddb6433 (39), torgy (39), twiximus (39), valerian (39), vsukhomlinov (39), watemia (39), wein4102 (39), Welka (39), wordcup202 (39), wynn (39), yoon4595 (39), 49thsealevel (38), AAG030 (38), ajokewinks (38), andreiaf92 (38), andrew0404 (38), android78 (38), annasmokey (38), anneh (38), anyep (38), bethleegy (38), bicufo (38), BlackTSQ (38), Bladesinger (38), catmcq (38), chehab82 (38), chris1989 (38), claudio.oliveira93 (38), corymyers (38), cousarr (38), crisscross2300 (38), cutis-chmidt (38), Daedron (38), danielmoncayo (38), DannyjRussell (38), darkmenace (38), demonom (38), dinoak (38), dmarkb (38), dolinsky296 (38), Dose (38), drzoidberg (38), durango177 (38), dwalland (38), EichholzFan (38), ekerstein (38), elena.balaci (38), eliu2019 (38), End (38), ending18 (38), epicneuromap849 (38), fepel (38), Garri96 (38), gause10 (38), glitterstargal (38), hamitnt (38), hane011 (38), Hello\_KayT (38), helveticas (38), hergot (38), hjmitchell (38), hollyw210 (38), idahonetworkguru (38), Iyeongyeong (38), jackruby (38), jarl (38), jasonsmiegel (38), jhsteckler (38), jimhen3ry (38), jmknap (38), Joe88 (38), jonathonl (38), jonito (38), joy.yues (38), kateeason (38), Kelv (38), Khaledsamy (38), kiriki (38), leroyone (38), life4life (38), lightningwes (38), lkj1472 (38), majernickt2 (38), matjaxon (38), maxion (38), meglizbay (38), Micky12311 (38), mightspikeyou (38), n2srmatu (38), naturegal14 (38), nereesew (38), neurophys (38), Nikroma (38), nixxen (38), njc (38), phinluva2000 (38), pknewbury (38), qzect67 (38), richjacoby (38), richturp (38), rlaehngsas (38), rothbardian (38), samueljlil (38), sara\_bsg1 (38), scottlstele (38), sheeprh (38), slemkeme (38), stefanvosloo (38), summitmark (38), susanczerpak (38), Teldrag (38), Tennis123 (38), the\_eye (38), theBowja (38), thehappymailman (38), ths06123 (38), thtrp (38), trystanmayfaire (38), tschaer (38), vandalite (38), whguswns103 (38), xo3k (38), xyberx (38), Yebisu (38), zagzag (38), zuoxingdong (38), 1 (37), 1111asa (37), a3881978 (37), alexanderwolf84 (37), alicelddel (37), anaisabelvn (37), angel10722 (37), annecat5 (37), arianeoseguera (37), arpazia (37), asdavis1 (37), binarybomb (37), birte (37), bnewstead (37), branwenreeves (37), breana00 (37), byakuya (37), calvix (37), CaptainIgo (37), ChrisFreckles (37), christine416 (37), cjcourtney (37), ck-railo (37), cloette (37), Crellas (37), crismizon (37), daherro (37), Denny26 (37), edwinshap (37), emtink (37), ewf1210 (37), ezbagci (37), flamablefuzz (37), flightreflex (37), francisturner (37), Gandor96 (37), gogitafroggies1 (37), HDH\_ (37), hellodaisy123 (37), HillObserver (37), igoiam (37), Interrobang (37), IsabellaBB (37), jackrats (37), jeffreyc1123 (37), jjanggu1852 (37), jnh03131 (37), jonas.j.nordin (37), kdibiase (37), keevil3d (37), kenardX (37), kgoblin (37), kmhaug (37), kolyakerz (37), krimin\_killr21 (37), kuroineko (37), letao (37), lhc1024 (37), Liljeholm (37), llojoe88 (37), lupin857 (37), magratheaner (37), mdrasted (37), metla1982 (37), mikolaj\_III (37), ming77123 (37), MissErendis (37), mitochondria (37), moewood76 (37), mosquitocat (37), mportwine (37), mutant (37), Muzzi (37), Nalakk (37), Nerdynoodles (37), Nikoli (37), lol909 (37), oveninethousand (37), Persona (37), piotrpany (37), Pivkst (37), pixieandrexie (37), premier\_kissov (37), proajh (37), psybacon1501 (37), quinona\_nox (37), quintesense (37), radon (37), razvanmitre (37), rdebliek (37), reballireu (37), remric (37), richilue (37), rjensema (37), rjzimmer (37), robreeder (37), salamiman (37), Samson (37), scarecrow (37), Schitrus (37), Senin9 (37), serendipitousP (37), sfinch89 (37), shuvva (37), sicaine (37), sivil (37), skipperdog11 (37), slowjam1993 (37), smaugling (37), Sofalof (37), st1010 (37), suyun345 (37), szemdrot (37), tajia789 (37), tjrwms529 (37), tobio (37), tom.139 (37), tommurphy (37), victor5 (37), voiceprintz (37), volcan152009 (37), xduzie (37), XebeX (37), yesir360 (37), zalvador05 (37), zonkism (37), alexkoff (36), amadeus06 (36), amanda10 (36), ancientwarrior (36), Apary (36), AshleyM95 (36), Asklapios (36), aussie10 (36), ayhokuyan (36), barre (36), beckbw (36), beekieport (36), BigStinkr (36), bongtae86 (36), brainfood (36), Bugin (36), caseverlasting (36), cchouin (36), cjPERSEPHONE (36), cyrus57 (36), Darksunrise (36), Dawn\_fire (36), dbuske (36), decompiled (36), delfin31 (36), devans88 (36), dimosbattu (36), dojinjjang8 (36), dougbrain (36), Earthboy2 (36), ebailey (36), edgecrusher (36), edwardtucker (36), Elfind (36), evenger (36), EvilDuncan (36), farti (36), fj-faase (36), foolevil (36), frenchy22 (36), gary600 (36), gawonsama (36), gman (36), hana0704 (36), harim9354 (36), HeadAroundU (36), helokol (36), honbiosat (36), hsk1203 (36), hungrybryce (36), iamda3dalus (36), iulianrc (36), Janblewett (36), jharvard (36), jong10221 (36), Jpam99 (36), jpr1012 (36), jschmidtke (36), jthames81 (36), judric (36), julia\_handra (36), justacea (36), kairkyo (36), KaveyKaveMan (36), kiwitibb (36), kkhcloud (36), klschubert (36), Kanski (36), kr.haly (36), lari\_lh (36), lbryant (36), leonievanderlinde (36), LiKo (36), lim7606 (36), Linuxman (36), Lionli (36), lithiumperoxide (36), lucc (36), m.o.l.senheimer (36), M33MZ (36), madaslue (36), malcolmtesch (36), mck6 (36), mcsmith01 (36), meltsyofaceoff (36), mera (36), Metafrosch (36), miessa (36), mireillegreene (36), missAjvi (36), mitchpf (36), mjurgensmeyer (36), MLtrying (36), Motionistas (36), mscheive (36), msjann25 (36),

na1690 (36), namaste (36), nayoung94 (36), nernio (36), nickfff (36), noahplayesgames (36), olin1122 (36), omargw (36), patrick678086 (36), PierreEstienne (36), postkassa (36), poub (36), qkrrkdud9084 (36), quasi (36), rediron1 (36), river923 (36), rnjstjdgns20 (36), robinina110 (36), rocktologist (36), roda (36), rorock (36), rosebud93 (36), sapagreen (36), scientist\_keith (36), scottca (36), smilehate (36), Starshine (36), stormsbear (36), suhyeon0211 (36), syoifczeri (36), Taminnugget (36), thedflood (36), toddsat (36), tofeel (36), traw203 (36), ULXC (36), valedim (36), vargo115 (36), Vattalus (36), veraeiran (36), veronicaa (36), Vojtaci (36), watchthis (36), yuckapoo (36), zaffa43 (36), 1c3n1nj4 (35), 5speednobrakes (35), adauzat90 (35), annaaz (35), artur03 (35), ash1111 (35), astokes414 (35), Bar-rasa (35), bayheim (35), Bernice (35), BiberDark (35), bobbus77 (35), booteh (35), BVE (35), caitlina (35), candygrrl (35), Charlotteecheen (35), ciko (35), clpjtp1 (35), codelazarus14 (35), colinzhao (35), cptanimal (35), crmullins (35), cutyall (35), danielley (35), dantc56 (35), dawn308 (35), DayWarrior6 (35), dconetta (35), DevilGun (35), dgrandbois (35), dgweber (35), Diesel.64 (35), Disphenocingulum (35), dongal (35), dopiso (35), edison (35), edwardvear (35), eswartzprov (35), Expletus (35), EyeWantToSee (35), Fareciks (35), fbunget (35), fiona1236 (35), flu42 (35), Fonlin (35), foppish (35), fuct (35), geojam (35), Geosearchef (35), gksqufl02 (35), graceevanoff (35), Grameir (35), hasanzk (35), hjohndro (35), hongjoohong (35), icewindhunter (35), igerow (35), igniskhan (35), im4everlast (35), Irontax (35), jandnlindeman (35), Jaspi10 (35), jdeen (35), JennyChonez (35), jimmyking211 (35), jjtcomkid (35), jkeinane (35), Joe101900 (35), joshwithaq (35), juliapangolin (35), kaush (35), kelemarci (35), kelseysullivan (35), kkkkokok (35), klarik (35), KriskIm (35), kvelandia (35), labrat87 (35), Laranja (35), leschnei (35), lethys (35), lexinatrix (35), littleyellow (35), Loooffy (35), Louielouie (35), lyraethe (35), matrim (35), MetalAura (35), mhanaburgh (35), Michal-TajbosStarsi (35), mpc92 (35), namhui4723 (35), Nekuros (35), nelke (35), Ninjanumber9in3 (35), nunez9619 (35), nwarner (35), opyn (35), parable (35), particleman137 (35), petzeroun (35), Pith45 (35), qjm0216 (35), qqq818 (35), Redjard (35), Rehodim (35), RhysLowry (35), Rix (35), royfongroy (35), sagargarg (35), searust (35), ShiBBy\_cz (35), Sick\_Pics (35), Skyey (35), Slapworth (35), slgonzalez (35), smy240 (35), sparkytheman (35), starmouse (35), steffenga90 (35), strienekens (35), suagrupp (35), TheDemonDog23 (35), theneurax (35), thomask (35), tikidoc (35), tjakejoyce (35), tony\_vanderpeet (35), trpeterson (35), twibble (35), vasilii (35), vvessla (35), wooden (35), wxs895 (35), yallasyeong (35), yeongjun0414 (35), yoonjoohee (35), zagra (35), zardosch (35), zebuyak (35), Zhenya85 (35), 11life (34), abyssia101 (34), agerson2014 (34), akbrewman (34), AlbinoArmadillo (34), am0053 (34), apom35 (34), april\_cat (34), asangtani (34), atolby (34), azes701 (34), BanWiz (34), bara.buchtova (34), Barb14 (34), bedste (34), bethnpa (34), biobailey (34), brainiac425 (34), briguin (34), bt33 (34), Burnseize (34), cardshark (34), Carlowski (34), carrjaz (34), caz44 (34), celerydude (34), Charini (34), chasedgoat (34), chriswait (34), clewi (34), Cloey900 (34), cmknight (34), conrads (34), cortiz94 (34), craynon (34), d2w\_tomee (34), dadams2345 (34), danischumi (34), Dark-elf (34), dbone2 (34), delevar (34), devad (34), dixy0 (34), Dormant (34), doughby (34), edderiofer (34), eighteyes (34), elalex (34), electrifieded (34), eliseag6 (34), ende23r (34), fdrreis (34), Fizzelix (34), ghkrwkd1 (34), gp1983 (34), grmaki (34), gvus63 (34), harryeye (34), hbeck2 (34), Hekka (34), helen5 (34), Hezeval (34), Hi1423523 (34), hihow (34), Holometrius (34), homa (34), hoursanov (34), i.emily (34), idahoev (34), ikkipyro (34), janeangie (34), jmasel (34), JP (34), justtim (34), kaiser.a (34), kazmiel (34), kcsinsi (34), kent4552 (34), kite86 (34), Kyssuber (34), ladynatty (34), Lahaun (34), lanariel (34), laurenmcisaac (34), Lavinia (34), lee5874 (34), leo\_vikingo (34), LeslieC (34), Levvv (34), lintaba (34), lorolink (34), lsgwon (34), luis.hernandez (34), Luke7595 (34), MadeleineJLee (34), Malincho (34), maria1256 (34), mariebalboa (34), Martintf (34), mdnscholl (34), menderofroads (34), microglifan (34), miguelaco (34), mimo31 (34), mk0208 (34), mon\_02 (34), moonwulf85 (34), mrlindsey (34), Nebel (34), Nefiv (34), nevrmoor (34), nicolas.laflamme (34), nikaad (34), ninanemila (34), nubiz (34), olivergkeith (34), orko (34), Otecknat (34), PARKER\_Rizmith (34), perifighton (34), posixphreak (34), profquad (34), rae7777 (34), regonn (34), remoody (34), rodnoy (34), rykashin (34), sander\_ (34), schroedinger (34), sevoff (34), Shigeru (34), shrodinger\_ (34), silver2127 (34), spidnel (34), superane (34), swishthefish (34), taru325 (34), TheBigZocker (34), theburnin8r (34), Thorin48 (34), topperfalkon (34), Turtle\_God (34), TYCentury (34), vortextm (34), WeePaul (34), white\_rice (34), wizzor (34), xenoson (34), zemcan (34), zurrey (34), zxc62217 (34), 1020185597 (33), 1132cm (33), 55nicky (33), a\_mosquito (33), abdelrahmanm (33), ace1151 (33), alakaluf (33), Alte.Eiche (33), anael (33), Arie1 (33), as-pirkin (33), astartemaneo (33), B.Bourgette (33), basedboy (33), beebug (33), BigDave007 (33), bradsquared (33), brannach (33), bunny (33), capiau (33), captainscf (33), CCampaign7 (33), charmjin2 (33), cina (33), cjrick (33), CNeuschafer (33), cptfgt9001 (33), culprit (33), cvlt (33), dalewh (33), darylthegreat (33), Daybreak23 (33), deathti-tan90 (33), dlaeodud2694 (33), drlidija (33), ducphan272 (33), eeslime (33), eggenstein (33), emma.herrick (33), evitech (33), Evoldem (33), feliciter (33), forsetgirl (33), fyretruk (33), ggamue (33), globewheel (33), Gorkmork

(33), Gurin (33), haihami (33), hellzangel (33), hunterSE (33), Imdagnir (33), iris (33), isaac (33), Isaacbronyman (33), Isztar (33), jmf028 (33), jmlong02 (33), josbys1 (33), kaist1110 (33), KalliaS (33), kasaff92 (33), kennykentucky (33), kira.drigo (33), KLwolf (33), knobi (33), Kyra\_P (33), longhairedfreak (33), lostwithindream (33), ltrdrum (33), Lyrka (33), m980806 (33), Magicmatt52 (33), marcelorstk (33), mark2d0 (33), mattdol (33), mcberts (33), methos222 (33), mimi6366 (33), mjennings47130 (33), mogadish (33), mojoaxel (33), murmurer (33), murphymen (33), myst07 (33), narutoneijisasuke (33), neuropshuff (33), nubok (33), OnionBestEye (33), opop64 (33), ozzjen (33), pablo01 (33), ParkingOrbit (33), pie1337 (33), Primeslav (33), Primisole (33), pwnvader360 (33), qoooo (33), rachelly (33), reviewedbread (33), Rezonance (33), richdahoser (33), roester (33), rrrrrroxi (33), Rschuster1991 (33), Rumbadebu (33), Samcas (33), sarah8412 (33), sentience (33), serilleous (33), shikalike (33), sicksixsticks (33), SimoProvenzano (33), sirjeeta (33), skilledscott (33), smileowl (33), Snoveral (33), snowmanbandit (33), sothe (33), Spicythunder (33), SteampunkToaster (33), steve2045 (33), susielunardi (33), szbalazs (33), taki0402 (33), talirem (33), Thanatos (33), thearczyslaw (33), theradone (33), tintin09 (33), tristanduke (33), urhuckleberry (33), vanessabackspace (33), vollpe (33), waigor\_alvis (33), wallaceg (33), welsh33t (33), wertyuiopq11 (33), willxinc (33), wns0525 (33), YCATS (33), ZC (33), Odin (32), 445limited (32), Anoar (32), arke78 (32), astor (32), Athom112 (32), Baelikhte (32), bananabrenna (32), baumbacc (32), belle (32), beverlylipsey (32), brendavo (32), bria\_lee11 (32), brian0130 (32), Cagol (32), Catt (32), cck0125 (32), cdandresen13 (32), cgb2359 (32), chitchat101 (32), ChristopherLeMaste (32), cmahung (32), cmarchand (32), colorkid (32), connorleimer (32), crazykyle10 (32), darter76 (32), davariax (32), davide.goncalves (32), davidlec (32), DavidShaw (32), dbieber (32), dhabboo (32), dhdlajrkw789 (32), doctormartin (32), ebertrand (32), enkerdraco (32), fuzywazabear (32), gbaer (32), ghaspias (32), gimli65 (32), Grichter (32), heather8301 (32), hhs871228 (32), hozish (32), hwkim (32), Iamhim (32), imnasnainae (32), jahlela (32), jamesl (32), Jaystee (32), jeraldine (32), jl13pt (32), joco11010 (32), jonathans59 (32), karagsa (32), Kato (32), kendahlslice (32), killerfun690 (32), kimgod1142 (32), klin18 (32), kwj0502123 (32), kykygo (32), Laila (32), laulau (32), lavalleurb (32), lexxis (32), lilu (32), lmeany13 (32), ltzChubbz (32), lucafrost (32), Lynn (32), m.wilian (32), mahjong (32), matrikzth (32), melf (32), metheme (32), mgaudett (32), microbexx (32), misho (32), Mitty996 (32), mjho629 (32), mm523 (32), mm-riter0211 (32), mnova (32), mooger (32), morphranos (32), mycroft16 (32), myself (32), myst1349 (32), Nachorl (32), Namariel (32), namk2011 (32), NataliaStevanelli (32), Nephesis (32), nfinitpls1 (32), niclef (32), Nicolas\_Ariel (32), novamoki (32), omh519 (32), paigej (32), Phil\_Ferrara (32), pju4113 (32), poewq123 (32), pokoloko24 (32), polyenthusiast (32), prattbm (32), qe3000 (32), rbhagat (32), Redtail (32), relza (32), rn20 (32), robertjhquon (32), rocapp (32), rooknpown (32), saj1269 (32), sam187 (32), sarahfreeman (32), sarahlou (32), saraneth (32), scarletfuries (32), schultzhenry (32), sdaarol (32), semmelb (32), sense (32), serein32 (32), Serj (32), sewol0722 (32), sff (32), Sildaekar (32), silentecho16 (32), SirLlama (32), skyebabe (32), snowdolf99 (32), Sparrowproof (32), srismani (32), ssnilsen (32), starcastic (32), stropheum (32), SuikaHakurei (32), sw587745 (32), swhite2015 (32), talbit (32), thegingerking (32), themojo (32), therj (32), thescorched (32), tiamont (32), tlbailey (32), tobi2412 (32), trevor.grease (32), tritonmars (32), tsien (32), ultramar2 (32), victorylow (32), wbic16 (32), wendar (32), Wreness (32), wtgmail (32), YuliaB (32), yunicorn0413 (32), yuong2008 (32), Zeckman101 (32), 13daldarondo (31), 780tatia (31), admiralack (31), aislingclancy (31), alexshark (31), allanjau (31), andreavergara (31), andysfg (31), anginehb3 (31), arc6872 (31), Artdis (31), atray (31), atticus96 (31), Azelbal (31), bajeer (31), bangbang (31), bck1337 (31), benwade (31), bichat93 (31), bloxxer33 (31), bobapril (31), Brainiac1441 (31), brycekrispytreats (31), bubbles82 (31), burgarm1 (31), Calycaa (31), carmen\_san\_diego (31), ccwaight (31), chloephillips (31), co12341234 (31), corion (31), daechan (31), daniel.d (31), danielkolano (31), DannyDyer (31), dano91951 (31), dapix (31), darcymarum (31), DeadMansReach (31), destery-smith (31), divvy (31), djliterati (31), ehmilkyway (31), elisalevytacher (31), esfynn (31), ethanruin (31), ewaters24 (31), Fiilo (31), fluroblue (31), fpc (31), geekymole (31), geftec (31), Gindle (31), goldfishlaser (31), goper86 (31), hitzu1 (31), hjoost001 (31), hoyazoni (31), hudhaifas (31), ice\_god (31), in121000 (31), inkang2244 (31), JaeDaeKing (31), jaikishanjayakumar (31), jasonpapacostas (31), jennybuz (31), jessica877 (31), jgid17 (31), jimbuckley (31), jimh (31), jinmanni (31), JoJoGame (31), Jolfgard (31), jonghyun0511 (31), Junghyeonu (31), justn700 (31), kashper (31), kevinmarzec (31), klausreichmann (31), kmj920109 (31), kok0422 (31), LaPimpa (31), leejijyeon7233 (31), leves494 (31), likea8 (31), lindseyc (31), lissylou (31), luciferase (31), lydiading (31), maadrijc (31), mackdad42 (31), magnetah (31), Majbo (31), Margelind (31), mariam (31), Mark\_Thernstrom (31), maryellen (31), MelanieTockner (31), melissap (31), metaphim (31), mirumirai (31), mjs (31), mmyates (31), morpheus (31), mrisssq (31), msaddor1 (31), myhabbits (31), napong923 (31), navicula (31), netra (31), Olegsoft (31), oliverga (31), ossi (31), oui230 (31), outthebigfire (31), Pepollinger (31), petbot (31), philblack1978 (31), Plague (31), Planhirn (31), plurk (31), primo4343

(31), Raa000 (31), rexyuewu (31), rotcif (31), RunsWithBear (31), sadfasdfasdf (31), SanatKeys (31), sandi (31), science69 (31), scolipendrae (31), sean.shingleton (31), sebasmateo10 (31), salamdejene (31), Seregon (31), seryeong98 (31), sharkvajay (31), Simonster14 (31), simonv (31), slyne (31), snare22 (31), spaceyliz (31), STEYP (31), Stupalacci (31), SYHuang (31), Syslord (31), Taehl (31), Taffyjane (31), Taklet (31), the\_homa (31), TheBenolds (31), thejacobin (31), themechafish (31), thetitaniumspoon (31), Tigrium (31), trilla (31), turtle\_master (31), twitch\_413 (31), ultra127 (31), vaime (31), Verovento (31), vlmonk (31), voodooigirl360 (31), whenpigsfly (31), WiseOwl1406 (31), xorwlsdn (31), yhsuk (31), yitong (31), yonunautilus (31), YP1550 (31), Yqjbzqf (31), Zoeeoo (31), a1637638 (30), Adam\_W (30), adri\_o (30), ags (30), AkibaNiashomi (30), alex\_the\_french (30), alexsm (30), allen\_je (30), amgisamgine (30), anastasia062992 (30), angelraymond (30), anniemo (30), ansjovis1986 (30), antonorl (30), antyhero (30), Arekh (30), Arenir (30), asteriajimin (30), AUserName (30), bebbodvx (30), benkmorgan (30), blacky (30), bobyn123 (30), bportland (30), brainman (30), Bugzila (30), bykestane (30), capitalXpantion (30), catd123 (30), chillie (30), chuckmanjoney (30), cindy1357 (30), claude33 (30), comet919 (30), Cucumbersquirell (30), damian.k (30), dixiebroadway (30), dj1992 (30), DmiStack (30), domas (30), donnellment (30), dwairn (30), Ed\_von\_Schleck (30), eeddaa (30), eispalast (30), Eldad.shahar (30), Elfhunter (30), Eric236 (30), EvilSaimiri (30), feyzack (30), firetree45 (30), foxmommam1 (30), Fribo57 (30), Frisky101 (30), frpou (30), Garfman (30), geekygreta (30), gelz (30), gjfvngjfvn (30), Goldflower (30), gpbabineau (30), greywolf (30), Hayama (30), honbioGAI (30), honbioSWa (30), hyrsz (30), Hyuji\_Kang (30), ignolan (30), inploded (30), jakeymumfie (30), jakubx (30), jasonp (30), jc4me00 (30), jisu1315 (30), jmillersobel (30), jr102893 (30), kareen00 (30), kaws (30), kekipeful (30), kguswl (30), killmenow5000 (30), klarson (30), korinatserk (30), kosss (30), kurani (30), kyon981108 (30), kyungjin0904 (30), lairstir (30), lala360 (30), leeg247 (30), leper (30), Lostwave (30), loyikting (30), lporras (30), makosgu (30), mapletardis (30), marek7410 (30), mbakos (30), mechogaster (30), messygurgs (30), mjhoib (30), mmikolas (30), mogaf (30), moumou (30), mrblueearth (30), mtwiko (30), MuesliMan (30), natashamn2008 (30), nezsmith (30), noakira (30), nuzz85 (30), Oceanlord (30), omble123 (30), opheliadaisies (30), origamiraven (30), patchyface (30), peachbed625 (30), phillman117 (30), phpp (30), pkbee (30), pliauga (30), ploer2001 (30), Ponce\_Padua (30), popus2 (30), pro\_zw (30), quwwnm (30), raleighs (30), reaver (30), renoskai (30), rhysd (30), richxs (30), sa666u (30), Saigon75 (30), sammymshreaks (30), sashadyan (30), sayaka (30), schjora (30), ScienceDog (30), selim52 (30), Serux (30), shenlia235 (30), Sicness (30), simon123 (30), slieblich (30), squirly (30), srwlq (30), st119416 (30), straubrey (30), sumpurpletidbitz (30), t169 (30), taquito (30), teadoub (30), tegal (30), terminalbeard (30), themany (30), tinawaldeck (30), traby1 (30), trolske (30), Troutcod (30), tzeentchful (30), uncommonsmith (30), unicorn4675 (30), valverde667 (30), variablesynapses (30), vfeigel (30), vhanri (30), vrvrv (30), whitneytf (30), WINDBAUM (30), wkvong (30), wongu777 (30), ydmsrby (30), Yovy (30), ypopy (30), Zaejra (30), zaliki (30), Zampone (30), zenece (30), zeshiro (30), zimmux (30), 1075238568 (29), 14thMain (29), akijade (29), AmandaHewes (29), amandalunde (29), Amaras (29), amedina15 (29), anurag24happy (29), arcd111 (29), argibus (29), Arkynm (29), ataani (29), awolfers (29), badgercat (29), bankstoneditor (29), bdero (29), bkelly (29), BoilingSiren23 (29), boramyi (29), bred119 (29), briver05 (29), brutkowski (29), bypeep (29), byteboost (29), caden (29), captor91 (29), chanel (29), charlym (29), cr8zydrummer (29), csikiati (29), csikonrox (29), czesiu (29), DaemonNet (29), daps (29), DaveScott1553 (29), dcook84 (29), deadlymapper (29), derdomi2410 (29), dgopstein (29), Ditto (29), DivingDuck (29), dlror (29), ehdgk7281 (29), Enon (29), erqaw84 (29), everpiano (29), fatalwounds (29), fenixes (29), fenneci (29), Fir3Chi3f (29), FirstQuant (29), flailingmuse (29), gabgollly (29), GamerNato (29), ghaeckel (29), GoldenHorse17 (29), gregory\_ball (29), hamsandwich (29), han9472 (29), hardcider (29), haydn (29), hilmar (29), hj0125 (29), hjs4443 (29), hppyclown1 (29), hubond (29), Humpleton (29), illinoiserocks (29), insamC (29), isabelghostly (29), jackattack2703 (29), jakepf (29), jangheun0612 (29), jaomi (29), jasonlunardi (29), johnglca (29), johnhrone (29), joshuagenubath (29), jtsly (29), julian.pratley (29), juliusa (29), justbecause01 (29), justincarcane (29), kara.drake (29), kathuen16 (29), katiebug590 (29), katseng (29), KevinT (29), kimkang (29), kimth0101 (29), kmichelli (29), Kretsche (29), ktbenson (29), kubera (29), kunk (29), kyle\_1080 (29), LastDragonofoldtimes (29), lemonhedgehog (29), Lenic (29), Lolojojo (29), Longfang6 (29), Lotmilla (29), louist91 (29), Isantana96 (29), Luvan22 (29), madgamer2008 (29), magnos (29), maniana (29), mapiasal (29), mapthebrain (29), marsupial (29), marxidad (29), mauriciod73 (29), maxalex (29), mcfries (29), meeki (29), mindpalace (29), mrosugamer (29), murky (29), mvanwaes2 (29), neurologicnico (29), nicelizreu (29), nok3430 (29), oscarmc (29), Peterpan (29), Phoenix1997 (29), phosphor (29), platelmint (29), ProfessorChill (29), quantum\_immortal (29), qudgns0014 (29), rabid\_woozle (29), ree (29), reitman82 (29), Ringolol (29), rjen (29), rooibostea (29), rotemm999 (29), ruuv (29), ryd (29), saradav (29), sarnall2013 (29), Sashka (29), scottwuzhear (29), scousemouse\_72 (29), semerson (29), settler (29), shoili



(29), sintiger (29), skdls21 (29), skoushik (29), slatervictoroff (29), sleepers (29), slyazejian (29), smbae0925 (29), sunsun4343 (29), talia (29), tashber (29), Tattoogirlie23 (29), Tek (29), thefoundue (29), ThonT (29), tjrgkh9810 (29), tomk (29), ubijakmasla (29), ughdug (29), warix (29), Werdboy2 (29), widrndi2 (29), wjdgpw11 (29), X36Z5 (29), xowjd0610 (29), yrvelouria (29), zeppo (29), Zuzianka (29), 03bbosong (28), 147258369 (28), adepesters (28), ahawkins (28), ahmedshihab (28), ali\_vakilzadeh (28), angelicheart21 (28), apfenton (28), Apophis117 (28), apostrophe\_s (28), AsdPyro (28), austinmcgowan196 (28), BarboraOndrejickova (28), BartekBartek (28), baumers (28), betaj (28), brianvogt (28), Buba (28), caesar (28), Candas (28), cannotdetected (28), canto (28), cfindling (28), chemistrob (28), chiaragabellini (28), cho8992 (28), choma (28), clairzeybear (28), Clausthaler (28), cmwise85 (28), crobey98 (28), cronehaven (28), cybersea (28), Dag (28), damoncampagna (28), DanielSam (28), darkfuji (28), Darkvidor (28), dbswovlf123 (28), debroglie (28), deinokokus (28), deLaCeiba (28), Deviceing (28), dinarubina (28), dlechner (28), dmichod (28), dotfrag (28), DougieMcBuckets (28), Dr\_Alain (28), DrNarcolepsy (28), eiens3557 (28), eldenandel (28), emmyft (28), EricJ (28), eridle1247 (28), faedrake (28), faielgila (28), fall13vox (28), fazekaw (28), gambler42 (28), gandziamen (28), Gardezlapeche (28), ginnymuis (28), graith (28), greenwonder (28), haley (28), hamster (28), hcarla (28), hecticryryry (28), hetalsma (28), hoag2610 (28), hope\_robot (28), hugobros (28), inkedhands (28), ioka1234 (28), IronSam (28), JanKes94 (28), jcb29 (28), jmf001 (28), jongdu7 (28), jordanfield111 (28), josephthink (28), jvandoorn (28), K\_Raven (28), kafwyn (28), karoly (28), kayhai (28), keif (28), kenbaxter (28), Keren (28), killimanjaro (28), kim8371 (28), kjnto (28), kleviat (28), knighthayden (28), kps (28), kyleeak (28), lava (28), lawprofsr (28), Leaf (28), leefergusson (28), lems (28), lfmd (28), lightingee (28), llmage (28), lmgzreg (28), luluid (28), Lvenok (28), M\_Nika (28), malabali (28), marcia (28), marialim (28), markthedoc (28), Mathisfun7 (28), Maureenmcafee (28), Maus (28), mczapka (28), meghanwiseman (28), MetaphysicalEngineer (28), MHartveit (28), mikalala94 (28), miroslav.osicka (28), mitanza (28), mmisiridou (28), moonya280 (28), mosng (28), mpackard (28), mrs\_dalloway (28), mzakk (28), naskobg (28), neuromancing (28), nico13p (28), nworbdet (28), orion1 (28), peca0201 (28), peterlada (28), pieskchr (28), pinky135 (28), plusomega (28), poru141 (28), purple73198 (28), purplegenie (28), rainter (28), ramiii\_y (28), redgiraffe (28), reena (28), ringzhz (28), rlotze (28), rmekdma (28), rmins (28), Roejen (28), rummissen (28), samirtb (28), samsonite (28), Scalle61 (28), scienceisfun402 (28), sclareman2019 (28), sheep74 (28), sirspud20 (28), ska2daizzle (28), sofopof (28), specracer (28), stelloudi (28), strunkie00 (28), telest (28), tja59 (28), tomtripp (28), tylvaen (28), unusedusername (28), Vanderdoug (28), victorash (28), Vievess (28), vollry (28), vonlolzor (28), vorticidox (28), willame (28), xstatic (28), yllekwu (28), zollermw (28), zski (28), 10040607 (27), 9048kss (27), aaaaaaaaaaaaaa (27), abby.jones (27), aco (27), adam1992 (27), agora (27), albertsmith08 (27), allenwalker (27), Alykat0121 (27), andriejunas\_lt (27), andy\_p (27), Arcticwolf101 (27), aulette (27), bartimaeus (27), bedclothes (27), benjaminflewi (27), Bibbi (27), BlackPhoenix (27), bluegreen (27), bndfdshil (27), bobbitybob (27), BVerlench (27), caebray (27), caraloopy (27), caroli (27), carsinagin (27), ceciliadolago (27), chiantianqilin (27), christf (27), chy1000 (27), cinnamon\_the\_snake (27), Clariita (27), cleonepetaotaku (27), combi (27), connorkadlec (27), cooooookies (27), coreh (27), Crammaman (27), CyklopsikPL (27), da95pa99 (27), danielgmu (27), davince (27), dawsonpsu10 (27), derven (27), desasterific (27), deviiq (27), dippydoop (27), djcatman (27), DownloadDee (27), drillkicker (27), drosophila (27), Drummer5521 (27), e\_macks (27), echung (27), efid845 (27), eric.cameron (27), erkab (27), Eunyong (27), eydel94 (27), eyegeorge (27), ferenc (27), fiona (27), fleabait (27), flip (27), formula\_hunter (27), gavilan67 (27), gg0624 (27), ggPeti (27), giganox (27), gns66975 (27), grayolve (27), guzhengman (27), haehae2589 (27), hahaid2003 (27), HipoKip (27), hwangstar3 (27), Icearstorm (27), ilda666 (27), ILive111 (27), imhiko (27), Ivet (27), iwaniec (27), jagustynka (27), jakeredrupp (27), Jcak (27), jeffwardo (27), jgrayf (27), jmain (27), jmw1234 (27), jon5307 (27), josborn87 (27), jrboyd (27), jsdratm (27), julegermany (27), Julianotis1 (27), JungHyunYoo (27), kabanos (27), kaets (27), karstil (27), kcedie (27), kijiko (27), kirstincarnage (27), Krystal.J (27), ksmason71 (27), kurataki (27), kwitsch (27), laputan01 (27), LavaScornedOven (27), laz101 (27), lcbroset (27), LedStarrTruman (27), Lia812 (27), libike (27), limefox (27), Liuu (27), lizzieeknapp (27), lpayne93 (27), Lucipel (27), lukipuki (27), Lyannah (27), maaikytje (27), maguderena (27), Malariuz (27), mbartholic (27), Mellenius (27), mendreck (27), merciero (27), mholguinphs (27), mit.o (27), mpsnowjosh (27), Mr.Quantum (27), MyEdgeOfChaos (27), neurocheese (27), newton15c (27), nickerbob (27), niep0329 (27), Nitrobacter (27), nor87 (27), nuubster (27), ohee (27), ojfrizzell (27), Pinto19 (27), Pretorian\_777 (27), purechaosdi (27), pwnygirl (27), qae12 (27), Raxah (27), reilithion (27), rodri40 (27), rrr345 (27), ruialao (27), Ryszard (27), sabrina1 (27), sack (27), Samum (27), Sander96 (27), sebok (27), seontek (27), shallowspoon1958 (27), shilmong (27), shirkan (27), sid961 (27), sixpence (27), SkyPanther (27), snake340 (27), Sneakysquirl (27), Solana (27), soup420 (27), Squeeton (27), steelcow (27), Sulcik27

(27), suomi (27), swanmacca85 (27), Swrew (27), Terence (27), The\_Ensorceler (27), themethod (27), theOne254 (27), thetasanctuary (27), topjujung (27), transhuman (27), tscherulli (27), tslattimer (27), twisocfan (27), tylerennis1984 (27), Ursu (27), verklartenacht (27), Vitaliqq (27), wicca (27), williamcoral (27), wintersonata (27), wjscpskrkr1 (27), Wolfframe (27), wonderworld223 (27), wornr309 (27), Yoshcakes (27), YoungChang (27), Zallios (27), Zeekza (27), Zeky (27), zit136 (27), ZoeyLuka (27), 1022650989 (26), 1087174752 (26), 1234asdf (26), 13x666 (26), 1722187 (26), 709086 (26), 8Kaza (26), agpe (26), Aindop (26), aj02 (26), alanfj (26), Allimon (26), ally\_mariko (26), alnik (26), amandakazsmer (26), ambiguouslyelven (26), amirka20 (26), aoterohe (26), AtomicAggie (26), austinschwartz (26), Baen (26), bazilisk2 (26), bla911 (26), blfang (26), blueeric2 (26), bzarewatermelon (26), CaiB (26), can\_has (26), carlagf (26), chdh569 (26), Chris136 (26), claret (26), ClarinaJeanniton (26), clzls7353 (26), CooKa (26), coral-liter (26), crimsonrunner (26), cruadin (26), Dakuel1 (26), dambatenne (26), dampriver (26), danamc (26), DanH (26), DanielTheDalek (26), darknezz (26), davehunt.oakwell (26), dbalbert96 (26), deliriousbiz (26), dennlinger (26), derrick1991 (26), detred (26), dienachtwarlang (26), ekeland9 (26), eli2499 (26), ellei18 (26), elliemae (26), Empf (26), eupitere (26), fann (26), Fluorineacid (26), futureruler1 (26), galaxy235 (26), garbinf (26), ghostiii (26), glen (26), gonestar59 (26), grtgbln (26), hapussai (26), hazebin (26), hhgkh (26), higashy (26), holdtd08 (26), huamela (26), hunterbetz02 (26), ik (26), ImpMK (26), italiano (26), JChew (26), jespervogen (26), jg1259 (26), jgminu (26), jktu (26), josephscallon (26), kaerl (26), kansas324 (26), karasutengu (26), kdo000 (26), keithtastic (26), kessilari (26), kierqwer (26), kikikik (26), kikiop (26), KimAnne (26), kingofir (26), kirellworld (26), kjccreates (26), Klizard (26), lamonita (26), larobusto (26), leafiabarrett (26), Leandr (26), leandro (26), liammcgah (26), lionclaw (26), Littlemissriss (26), Lorde\_Kaiser (26), lucidcomplex (26), lucip (26), Luninani (26), lycorine (26), malganis93 (26), mambo-rambo (26), manbearpiggins (26), mandy.bobbles (26), Marian (26), mariannmay (26), markoh9 (26), meecie (26), mevans (26), mfmurdock (26), mhsuga (26), mikk166h (26), min06143 (26), mini3029 (26), mkaz (26), moustik01 (26), mthompson (26), muuzr (26), nanguett (26), natedogdfll (26), navkal (26), nightra (26), nignog (26), nirani (26), nomadrac (26), ny (26), ohs1018 (26), patrick.jamyang (26), pbk101 (26), peitoilustrelusitano (26), peteturner (26), phemini (26), phyllum (26), pisqsig3 (26), Pizza\_Rants (26), PsychoGoingNeuro (26), pursuit88 (26), R.G (26), RageAgainstTheVM (26), ramaks (26), ramk (26), ramplo (26), rbtrry (26), rchristainsen (26), rharkle (26), rhdtfb (26), rlxjf4003 (26), roadfox (26), rojoemmit (26), RonnyKay (26), Rossy (26), SaiKit (26), sajtos (26), samantha7 (26), sanyael (26), saskia17 (26), scvgood287 (26), sd5207 (26), sergiodehita (26), Shadow\_Wrieth (26), shiro (26), shorty15 (26), shwa1211 (26), Simulinka (26), SirNate (26), skull.tequila (26), Slayer91 (26), soogyeong (26), spike-maw (26), Squint3 (26), ssorc (26), steenezel (26), styro (26), sungbin0718 (26), T.E.A. (26), tellewsen (26), Thats\_me (26), theterminator (26), thyoga (26), timmeh87 (26), tinery1043 (26), tixiah (26), Trentinoz (26), Tsotsi (26), turn (26), tylerprentiss (26), vegapark (26), vic2106 (26), victor (26), vietbrian (26), viviennevictor (26), vladimir (26), vlc2014 (26), vlevasseur (26), WIRE (26), WinterHeart\_contacts (26), WoodieDaThird (26), xsandru (26), yalla1357 (26), yanteak (26), ydal (26), Yea (26), yroy (26), yupa (26), zumpi (26), zzzio (26), 31orcas (25), abarnybox (25), Acaelus (25), acartam (25), acquain (25), adklaus (25), AdonijahEndersby (25), aemilius (25), agnesleger (25), aka1 (25), akikosuzuki (25), akyo.k (25), alager (25), albert.anastasio1 (25), Alois (25), alpinex (25), Altariel (25), amors-esomtelcom (25), amyh (25), antelope (25), anubisthejackal (25), Aties (25), badak (25), bchoo (25), becka (25), Beerentraum (25), begin79 (25), benjaduenas (25), bhanley703 (25), bigred3690 (25), bistea93 (25), blackadder (25), blair921 (25), blesseddh (25), bricewithani (25), bvtttercup (25), bwian232 (25), c\_elegans (25), captrandom (25), cho (25), chozo (25), chrisb41 (25), Chrosh (25), Clitoris (25), cjayjones (25), coalminersgd (25), cohar (25), cpm10 (25), creepypuppy13 (25), cxlloyd (25), cyan (25), daplayer23 (25), dayman (25), ddg122 (25), dfvbrosh (25), dlzmfllsk (25), do114o (25), drpain (25), e\_j\_pi (25), ecairms (25), elblobbo (25), ellafricka (25), Endel (25), Enrico (25), Enter-DMZ (25), enwudz (25), equickbear (25), ericfuller1 (25), erik.lee (25), ernest97 (25), familyfun (25), felicitasl (25), filamentglow (25), filipre (25), foggyfoggy (25), fox2580 (25), furrypony (25), GageTerhorst (25), giantsfan (25), gigiz (25), goalie1998 (25), gong1 (25), Goohl (25), gotdairyya (25), gpressman2019 (25), greghinson (25), guddn9921 (25), h.yang94 (25), HardytheCat (25), heli6 (25), Hellokitty12 (25), hl3mgr (25), Hollinic (25), ice\_des (25), iwonder (25), jaku (25), jamesvsteel (25), jamilamde (25), jampig (25), jasntiamak (25), Jcurtin2 (25), JiminLee (25), jm973 (25), jofonseca (25), johndevone (25), kairos0146 (25), kang792 (25), karb (25), katecaguirre (25), kawaii\_brain (25), kaymmurphy (25), kblaket (25), KennyPL (25), kjk998209 (25), kkr (25), kn8aj (25), koreaclan (25), kryssybee (25), krzypilot13 (25), kseifnaraghi14 (25), kurumi03 (25), lagondat (25), lani (25), lebroski (25), Lemony\_Snicket (25), liter85 (25), livianiarra (25), locke (25), lucky.lee (25), lusun\_up (25), madistod (25), magoule (25), marcusmanph (25), margiewalker (25), marieestrada (25), marine1346 (25), Matteo91 (25), MaxCodes (25), maxitothegreat (25),

mechluka (25), mickey08 (25), mightyheretic (25), MNAgurcia\_97 (25), Mora (25), mtvlukas (25), myneurons (25), n3oinfinity (25), nattiebear (25), nayan99 (25), nicole.e.smith (25), nkmoes (25), noaboatx23 (25), NoorulAinIqbal (25), nrajkarnikar (25), nuzayets5 (25), Oberon4759 (25), obriensk (25), Oguona (25), olliknolli (25), olnoodlepants (25), osipov (25), otreborlatan (25), ouwiyaru (25), Ozymandias (25), pafin (25), pdjturner (25), pecore12 (25), pengwah (25), peti (25), phonos (25), pks9547 (25), Poko (25), psygate (25), ramiro12 (25), rauxiegurl (25), rcsarac (25), redhead1667 (25), rerere (25), richhz (25), rmccrum (25), rtopa (25), sadekov (25), samplar (25), schnipper1 (25), sckpoon (25), sebe4106 (25), Sebi\_Tramontana (25), sebtim (25), serendipity9000 (25), ShaneMcC (25), ShotRock (25), Shrecksdower (25), simbapimba (25), Skeptizzle (25), skye2520 (25), soji (25), sooh916 (25), stanislav13 (25), steagu (25), steuey67 (25), subterfuge (25), sugandha0904 (25), sylviecabris (25), taylorv (25), tbonE77546 (25), tdmitch2 (25), technique (25), Tempura (25), Test123456789 (25), thecommodore (25), TheOnlyOne (25), thinmint (25), tiftik (25), Tignass (25), tjlarch (25), tomgowen (25), touchee (25), tutsi (25), Undeadsniper (25), unx (25), Uversky (25), Valbene (25), Vinca (25), vincentadam87 (25), vuspr (25), Warcry (25), weaslybill (25), willie.kim81 (25), willmschris (25), Won (25), wyseur (25), Yeesan (25), yuliny (25), z7cheng (25), zipa78 (25), ZTek001 (25), abcperson (24), acl1134 (24), Actaeon (24), adamb1 (24), AlexCascadia (24), amoraes (24), anexum (24), angkhira (24), Anveshna1 (24), ardis (24), argentyn (24), astray\_mw (24), awilton2 (24), bajd9364 (24), batooka (24), bendo (24), benj (24), bigmc323 (24), billy2468 (24), Bkind (24), bloby22 (24), bmw066000 (24), bouncydeb (24), cayman (24), cfat6412 (24), chakaponi (24), chelo (24), clarissam (24), cmn (24), Collie (24), ColtonPatterson (24), danach (24), DarakLanth (24), darko.pilav (24), darylism (24), davidlooki (24), dbdbwer (24), demzon (24), Deon (24), desert666 (24), dhtjdgus2222 (24), dinin (24), dogparkdays (24), dragon (24), Drakal11 (24), dreamer2345 (24), dyddlf73 (24), edvard (24), eliana (24), emathis1 (24), erga (24), Evan1254 (24), evilgenius (24), evita (24), fortressbow9 (24), fruit174 (24), fvlr (24), gcq (24), GeeMoo (24), GelforceM (24), GeoffreyY (24), gizal (24), gkstmdb9 (24), glcmzz (24), GOA\_CLi (24), Grahambo (24), grantdp (24), Grimkrieg (24), Gritty\_Reboot (24), grosca1in365 (24), Gryphus1 (24), guitargeek70 (24), Gul (24), gunwoo0605 (24), gyungigod (24), healyjc (24), herodes (24), honbioiru (24), imp0309 (24), indralia (24), Introspektywina (24), IrisPatricia (24), jack65 (24), JairP (24), jamiea (24), jawnan (24), JDB083 (24), jlkauffman (24), jlwade99 (24), jmorrisd276 (24), joemclean (24), john295 (24), jokerzwilde (24), jordinn (24), jtat93 (24), juliad (24), just\_julie (24), jwiedey (24), Katniss333 (24), kerimaxwell (24), khgerhard (24), Kidd0 (24), kids143 (24), kinghuibu (24), kinkerly452 (24), kirba (24), Kneas (24), knowldo (24), kraza2 (24), ksy463 (24), KWANGA77 (24), la\_nausee (24), LagMasterSam (24), leilasaleh (24), Liut (24), llaurin (24), m3dwalker (24), Maj86 (24), majkip (24), MaNiAk (24), mayzor (24), Medavinci (24), mezenin (24), mktymkimtaeyun (24), montyandchip (24), morrill88 (24), mrgolden1 (24), mspych (24), mtlayton (24), Mu57Di3 (24), nat.236 (24), NavyMarineCoreMc (24), neogirl101 (24), Nicolahao (24), Niina (24), noteflight1295 (24), NPC (24), orcmando (24), orviskyle (24), pablisho (24), pastequipped (24), Pathenon (24), petrq (24), Pflinn (24), pilipenko (24), Polish\_Hussar (24), pshlord (24), pythas (24), Qwap (24), qwert137 (24), qwerx (24), rainwulf (24), ricardogs (24), rksid (24), rlofeudo (24), robert\_dyro (24), Rosemarycho (24), Rstraubing (24), ryush00 (24), s\_lexx (24), sabrewolf243 (24), sanderhvs (24), sarahwg (24), saytolove (24), sbgowin (24), scenecs (24), scooterholiday (24), scottkunze (24), shuiwa (24), sigi (24), slambee-tle (24), smarty99935 (24), smullin (24), spencer.wile (24), spencer23 (24), srwenner (24), ssavell (24), styminator (24), tamiveldura (24), teatazzes (24), the\_janis (24), Theyer (24), Titanmaul (24), Tomjo126 (24), tommaso (24), trembn2 (24), turquoise (24), unsanity101 (24), Valdezert (24), ValentinRunge (24), veelckoo (24), Veronika88 (24), vivvzh (24), wansaby (24), will122 (24), will66 (24), wkd48632 (24), wwaters111 (24), xanderxrush (24), XxAngelickittyX (24), yeonhosuh1 (24), yiyamo (24), yutaro (24), 1000papercranes (23), 1033506901 (23), a980909 (23), aaa124 (23), abmichael (23), acrivoi (23), AgaEstrella (23), ahasuerus (23), alepham (23), alexkab (23), alyssa (23), amariem81 (23), AnDes (23), andiglack (23), andschie (23), angeldcm (23), AraraOnline (23), arkantos (23), ashley.stevens22 (23), ashlyw42 (23), ashx23 (23), avehannah (23), blackcube (23), Blootnyr (23), bluidshay (23), bobtree (23), braydendavis (23), bryceksmith (23), buggy7 (23), CelineHagbard (23), chacker (23), chadwicki (23), chirs (23), chocom0fo33 (23), chofch (23), choijy5847 (23), cmorelli (23), cmpiv (23), cnchq (23), coconm (23), collidepede (23), comicck (23), connorjones (23), corpsman (23), crewpet (23), dac002 (23), daegoth (23), daftdom (23), Daniell (23), dante.jimenez (23), Dashing (23), daville7 (23), Davon (23), Debka (23), Deety42 (23), delphinias (23), dimension (23), djdj159 (23), dkreuter (23), Drasang (23), drdemon (23), dryad701 (23), dunpar (23), ecayer (23), eldano3 (23), Eldarnar (23), elizard (23), Elkhead (23), ellekolks (23), emluciano (23), Enot (23), er33987 (23), eruthphillips (23), esbboston (23), EthanTrull (23), Faber (23), felipecicero (23), FelixWolf (23), FMRTerrific (23), fuzz59 (23), gahg (23), Gal3rm (23), garip (23), geavime (23), geosergeevms (23), gittins (23), gpmorris (23), Guslar

(23), hashik (23), hjin1502 (23), HunterHW (23), icantuethelletter (23), icisdraqua (23), ilfat (23), indiglia (23), infelio (23), jakobswede (23), jbguyon (23), jjmin0223 (23), jo3mull3n (23), johnnytop999 (23), kaki462 (23), kamarek33 (23), KathiKube (23), katja (23), kcutshall0710 (23), kelp (23), kerry (23), khaalan (23), Kharath (23), kingkirby333 (23), kingofspain1234 (23), kiradust (23), Klingsor02 (23), kostur10 (23), kyleryanjoan (23), larty (23), laurelio (23), laurenceliu (23), Lazer2004 (23), lecouchon (23), leejohn (23), Levy\_ (23), liga0823 (23), limonard (23), loidery (23), Lord\_RASSK (23), lovelace (23), lse0977 (23), LucasJ (23), luimalmeida (23), lukaspiliponis (23), Lyli (23), ma\_fede (23), madhatter375 (23), MadScientist314 (23), Mahimaaa2000 (23), malia.12 (23), mamacraighead (23), Mapharazzo (23), marj (23), marjorie (23), maryg (23), maximilya (23), mcchrisco (23), mihaela\_13 (23), mikelboi87 (23), mikyatope (23), mindzoo42 (23), mintzer (23), mirkist (23), mlle\_agnes (23), moni1087 (23), mordymion (23), mppinit (23), musicallyminded (23), mwhiton (23), myjoon.kim (23), naikele (23), nbgarris (23), neurolancashire (23), neutrino123 (23), newkimjung (23), Nikczemnik (23), nini.violine (23), NMDAlej (23), oboromoon0000 (23), oigufur (23), Percoboist (23), peter1998 (23), Piligo (23), pixelthief (23), rabidboy (23), reokue (23), rexgao (23), rhkgkr159753 (23), rickypage (23), ricreis (23), rightcoastrider (23), Rosiebud (23), rumenizerjav (23), ryantatu (23), SavannahZ (23), sblacklow (23), scottarcher (23), seagullsonalert (23), seanxxo (23), sebastiengllmt (23), seblende (23), shadowtiger502 (23), shekerev (23), shmolkko (23), simvegshu (23), sinbit (23), SirKarp (23), slagspurv (23), slmille4 (23), somisetty (23), sonypic (23), Space\_Hippo (23), ssager (23), state (23), stefanCCC1 (23), supermoi (23), taniagobeil (23), tarkin (23), tatscub (23), tdmz (23), Teoss (23), thajokerwild (23), thgus3693 (23), tholbrook4 (23), tkfkd1519 (23), Toby\_2015 (23), tomathom (23), tsine (23), Tycho (23), umziumzi (23), unclemusclzhour (23), uyhjdkl (23), veganpi (23), Vitoledo (23), voerdus (23), walu (23), wasd (23), willywillwill (23), woddl (23), wonsik (23), wrrh (23), wyer1 (23), xanthej (23), xyphink (23), y2bd (23), yeshin1500 (23), ylimabr (23), yvonneng (23), zpatros (23), zwaggoner (23), 0M3N (22), 17454538 (22), 23staris (22), 3ll355ar (22), 98accipiter (22), abel19957 (22), ac124 (22), adslalctel (22), aetherean (22), AgnesXDD (22), aholt (22), Alcarinque (22), alphameg (22), amvagabond (22), Atata\_atata (22), avyclair (22), Badec (22), baylormedic (22), Bearflame (22), beatle42 (22), blacknovayzfr1 (22), BlindMonkey (22), bloxman830 (22), bluegem (22), boogedyboo (22), Boshido\_Brown (22), brianna379 (22), brisance (22), brody04 (22), BroofTerr (22), bryantj247 (22), bxleon (22), cadavar (22), Callum\_H (22), Cartogis (22), cfang9001 (22), cheslock8 (22), chocophobia (22), chunsun21 (22), clarebear (22), clio0719 (22), cmetz (22), cmg7011 (22), cmr17 (22), cody.rice (22), coelacanth (22), cosmicrat (22), Crymzon (22), CyDFect (22), dacaris (22), Danmarcnichols (22), Dannynorocia (22), Darryn (22), dbajer (22), ddantas (22), deaker74 (22), demorie1 (22), djmorin (22), dogani21 (22), dripdropgt (22), DrNogueira (22), dubouche (22), dutch14 (22), Eapcjb1924 (22), el-lolazo (22), Epic3lite (22), eric.schreiter (22), erickls (22), ErinElizabeth (22), estebanrodriguez (22), EwgB (22), ExpCompTec (22), felixmu (22), felixworks (22), Fenntil (22), fireheart321 (22), fisherdec (22), flybypc (22), flyman907 (22), fpninja (22), Fwomp (22), gallatea (22), Gemini (22), giovannitorri (22), glee38 (22), gmae (22), gnl-dud15 (22), goffstown (22), Gravit (22), greencaktus (22), greglynn (22), GSaladin (22), hairking1989 (22), hall0961 (22), hanter (22), Harkain (22), HaSaKL (22), headlong (22), hia0108 (22), holzi (22), Hrodwulf (22), immt2 (22), Ipsalo (22), Irial (22), iskra87 (22), itoming (22), j6m8 (22), jackylu97 (22), jaguar7236 (22), jbogart (22), jhsinger (22), jhulten (22), jimbo00000 (22), jkay65 (22), jonanx (22), josephprice (22), Josh924221340 (22), joshuasartor (22), juhe (22), justinwayland (22), jyc0417 (22), k\_stargazer (22), kanaborama (22), karlite17 (22), kchooey (22), kellbell666 (22), Kevin\_Strazak (22), kia28 (22), kimchulho (22), kirasmum (22), klintrh (22), krjh4028 (22), kss5711 (22), KubiJacisin (22), Kuczmil (22), kwitan (22), kyle.easter93 (22), leehakjin159 (22), leraoesa (22), liliz3 (22), ljelliott (22), llamapaca (22), lolafakunle (22), lredhat (22), lucasra (22), lutianyou (22), m122200 (22), Ma.K (22), MaffiN (22), malmuki (22), mandyhib (22), mania (22), maphead (22), Maros (22), marvy (22), medicjon (22), meng (22), mike2650 (22), mmartin (22), mogur99 (22), Mojoe (22), mollysobek (22), monium2134 (22), monoprimaso (22), morrissystemsllc (22), mossy (22), muellerseb (22), muflone99 (22), Mykul (22), netgk (22), Neuronatron (22), nimblethorp (22), ninjacat (22), noobhater235 (22), Nschulhof (22), okskosk (22), optically (22), orionfyre (22), or-thalionar (22), Ouroboros74 (22), paperorbs (22), Pat0alex (22), Patatino (22), PhilipEss (22), phillipstearns (22), physiocyca (22), PigofBattle (22), pkim20 (22), pochi (22), pocky1209 (22), pojoman (22), pokoir1 (22), popboboxery (22), potatoox (22), prisuria (22), pstanar (22), pungnibi (22), rabijeta (22), raduromeo (22), ragnaroknroll (22), red535 (22), RedBuddha (22), Resonating (22), richj (22), rileybct (22), rlagkdms10 (22), Romman (22), Ronnie\_Soak (22), roukain (22), russdurrett (22), sachyvega (22), Sallin (22), sallyhp (22), salmej (22), Saulyte (22), science\_nerd\_101 (22), scottash (22), scottdw (22), sebinh102 (22), sedong25 (22), SeldenK (22), sfcohen (22), shanedidona (22), Sheep-cake (22), shooster (22), silveriopez (22), skinsutures (22), SofiaMancelos (22), solidlinkbro (22), sravanthi0817 (22),

stephcampbell (22), steppensquircle (22), sterhoke (22), stern (22), sungorka (22), syfi (22), TaraMara (22), teboma (22), teddo (22), teknisyen (22), thecrystalcrow (22), theshortearedowl (22), Thornies (22), tigermatt (22), tony1509 (22), ubuntu (22), ultermarto (22), ultrarok (22), Vasekk (22), vero (22), victorzale (22), vortexmy (22), w\_lars (22), Wapocara (22), whatels (22), wieprzti (22), window717 (22), wnsdud5013 (22), writersblock (22), xtrapwr (22), y0\_maa (22), yottaflap (22), zale646 (22), zhxst (22), 5035als (21), 7ships (21), acb26 (21), Achempel (21), adde (21), Adryon (21), adyax (21), air\_fusion (21), akfktdk (21), alizafarasif (21), alsldi17 (21), Amaranth (21), amarantineyes (21), andressosa001 (21), annalise\_lance (21), ansjovis (21), anyav (21), apdlvmf0584 (21), Arcainia (21), aromy77 (21), Ashengale (21), asrdg4 (21), Astrofreak (21), awilton (21), baaj (21), Baerlili (21), balinsky (21), banyani (21), belly (21), benjaminbae (21), benjaminbeamer (21), benjaminpio (21), bernardyang (21), betsym (21), bfskinher (21), boona (21), BradipoMorto (21), BrunoKestemont (21), bryvo01 (21), casrom (21), cbosse86 (21), cdmp (21), chee-wee2000 (21), chemi (21), China\_Liujiankui (21), christaingarland (21), chroman (21), chsihs (21), cloutzs (21), cobra9891 (21), coco1457 (21), colm728 (21), cometbird (21), cristinadriana10 (21), cvijo666 (21), cwang (21), d5151ema (21), daftymcnumpty (21), danizoodle (21), DaveRobinson (21), dgfitch (21), dhkim0800 (21), DIBbergal (21), discordchild (21), djust (21), doerrst (21), done\_veni (21), dottie (21), draize (21), drakaan2 (21), eaalmeida (21), eclaras (21), elin.vin (21), elisabeth795 (21), EmEs (21), erikakuntar (21), fabisz (21), fairy40224 (21), Farnzy (21), farts4260 (21), fashionart (21), fester326 (21), fethi (21), Flocktime (21), Floi (21), friedrich.hunstock (21), gbrenenr (21), gmn1313 (21), gooshay (21), grog (21), Guckguck (21), hacker4 (21), han0yoon (21), hankborkum (21), haoying (21), happydagger (21), hashtagliams (21), hayley.mitche11 (21), helbabi (21), hgkim (21), Hobbyscientist (21), ILive1111 (21), inestimoteo (21), jamgall1010 (21), Jdomingo22 (21), jesup (21), joekintyht (21), js73001715 (21), juha\_nurmiharju (21), JustinMongold (21), jwaywood (21), jzezel (21), KafkaKafka (21), kartik\_subbarao (21), kaustubhmani14 (21), keeyon10 (21), kelleymic (21), ketemai (21), killertom (21), kings6767 (21), kivou (21), kmc-kee90 (21), ko4815 (21), kraku25 (21), kreativepoison (21), kristengracelee (21), Krzysztofer (21), ksh9799 (21), kvib (21), lanzz (21), Layla321 (21), leadvert (21), leonardmeltsner (21), lightningbunny1 (21), lilymarmo (21), lledargo (21), LNorbert (21), lozzyboy (21), lrnshoe (21), LunaSyko (21), luv0520 (21), m0bb (21), major\_pwnage1 (21), margaret42 (21), marziodifeo (21), Mavrickx117 (21), Max\_Harper (21), Maye (21), mdowse (21), mennobouwman (21), mhj7822 (21), miloserus (21), Minecre (21), Minia (21), minliu (21), mirey (21), Misteriggy (21), mobradovic (21), Monstah (21), monti (21), montster27 (21), moonillusion (21), mswatson (21), mwoods1650 (21), MynameisJeff (21), myriad (21), nancydrew (21), njhinds95 (21), nobgoblin (21), nodnerb93 (21), nokor (21), otenh (21), Ovorius (21), owenga (21), ozlrs (21), parkji726 (21), peachyseen (21), pgirl20 (21), phrebh (21), Progy (21), psdnom (21), puxatudo (21), qkzfk1113 (21), qudals (21), QueenDianna (21), Raffy (21), randomcitizen (21), rdaurio (21), redtank (21), reichlgt (21), rembrandtgirl (21), rhcp3620 (21), rhowoosk (21), rifley (21), rimpled (21), rockzen97 (21), Rolanbek (21), rrr624 (21), rubybox (21), ryou (21), saitei (21), Sammo\_Hoi (21), samuelbrown (21), sanderhus (21), sbiller (21), shareef.202 (21), shoutingwolf (21), Shrodinger (21), Shuropi (21), sierragrace (21), simjaeyoun4 (21), slamvan (21), Slide20x1 (21), sodap0p53 (21), Softspoken (21), spica0503 (21), Spock.7698 (21), staalk (21), stargirl648 (21), stoshy (21), stringtheory79 (21), sx349 (21), symplman5 (21), TamGee (21), tas41 (21), ThatOneCat (21), thehobee (21), theflacox (21), TheLost92 (21), TheSentientCentipede (21), Tierce (21), tiger4812 (21), time3609 (21), tina.brain (21), tlallen617 (21), todi (21), ty10303 (21), ulgoon89 (21), vane (21), vcharles1 (21), verity (21), vivizaza (21), WesselMatthews (21), whany1009 (21), whitedove (21), wisery (21), wjdtka3 (21), wjpmoses (21), wornjs564 (21), wyattab (21), wyatto (21), xenius36 (21), xyzavex (21), xZhanG94x (21), yeeun6211 (21), yoptmr (21), yunah.han18 (21), zahirzahir (21), zetafunction99 (21), zeteticgirl (21), zielen1922 (21), zotsagogo (21), zselim (21), 0x0000 (20), 1031171126 (20), 114alwjd (20), 2young (20), 3ghmjs (20), 99257 (20), ahdavison (20), ajinsf (20), aladrieth (20), alfred\_harbinger (20), Alyisia (20), ameliar6 (20), anakane (20), andrew1.a.mills (20), anxiousarachnid (20), apersonfromhere (20), arbiteur (20), asax000 (20), Avtar00 (20), awesomefar (20), azoarcus (20), Bakeon (20), bc3anatomy (20), bgervais2015 (20), bglosh (20), BigPhil1986 (20), bionicsteam (20), bleyde (20), bob1000 (20), bombel (20), boulbx (20), brothernature0 (20), broughdiamond (20), canberraiceberg (20), CarrazcoJ (20), cath (20), cering (20), chapinhall (20), chossman (20), cipresso (20), cjdelato (20), cnvm15 (20), colbad2 (20), colliedog137 (20), ContactSupport01 (20), Corndog (20), cronies (20), Cubone5147 (20), curiousimbroglio (20), cyj0104 (20), danielsoliman (20), DarkWings (20), davipo (20), davrobin (20), deepil (20), deine1mama (20), Delgo (20), delirium81 (20), Demx (20), dfranz (20), didi781 (20), DieLens (20), Diggi (20), Dilong\_paradoxus (20), dkswlgns0502 (20), dlthdud9887 (20), dnissim (20), dom1949 (20), dongwon0409 (20), donkey (20), doofa (20), dseraph (20), dsrich (20), Dundee (20), eaglerunning (20), eldo1029 (20), ElleFrances (20), EpicBlueCrayon (20), EpicChibi (20),

erniea (20), errra (20), EthanBenjamin (20), etothei (20), eunyemin (20), ex11223 (20), eyetrekker (20), eyjaring (20), f.delrue (20), fayfff (20), fooo (20), Fysh (20), gamefun\_1 (20), gl08holg (20), gleinssi (20), gnieh (20), Grandel (20), greatershrew (20), gudo (20), h13r0glyph (20), hallowedarcher (20), harleyspankier (20), hbstussman (20), heat Chad (20), hedzhog (20), hhd6109 (20), hkitchen (20), hooverbass (20), HugoBeleza (20), humbug12 (20), hyunclear75 (20), ich73 (20), igotbored112 (20), itatemyname (20), izzytdi (20), JakubS (20), jamietrius (20), jarlarntzen (20), javier\_esiqio (20), JBeanAwesome (20), jben (20), jborghi (20), jeffrey0628 (20), jessptl (20), jgnugent (20), joelmancuso (20), josh6472 (20), jouihyun (20), jrswab (20), juhuudi (20), Julio\_Sousa (20), justlisa328 (20), kalmah (20), karanagarwal (20), Katiejane (20), kdy309 (20), kgoodwin (20), khan1206 (20), kimori (20), kjs817 (20), Knopers8 (20), kokabiel (20), kongfattwonglin (20), kos827 (20), kr1070 (20), krejh (20), kunkunsama (20), kuriakose (20), kurt (20), kweinbrecht (20), LaiKiirmodel (20), lanndoc (20), leepj (20), lidia1818 (20), lilwestcott (20), linxli3 (20), lippmanscience (20), lisaf4396 (20), lucypa (20), LyokoJames (20), maikolcr (20), major.olchen (20), mammmals (20), marlokenna (20), MasterEye (20), mattatbat (20), maya\_mcgrath (20), megara15 (20), meils (20), Michael-Nelson (20), Midgiemorán (20), mini1037 (20), Misery (20), moltenmagna (20), morientes089 (20), Morther (20), mrlister3319 (20), mullintj (20), munkyhead (20), muzakayy (20), Naddi (20), nafta65 (20), naturalx (20), nenia (20), Neonkitza (20), newchase (20), nickk8 (20), noble3001 (20), npiani (20), nuclear85 (20), nweber47 (20), nymvaline (20), o17flyers (20), OanaAlexia (20), OddSock (20), odmir (20), ombental (20), opopanax (20), orporator (20), ourtimes (20), p3te (20), pammarrí (20), paton (20), Paveloom (20), pavolg (20), Pentothal (20), PeterML (20), Photon (20), pierref (20), Piovere (20), Poets\_Sword (20), PolarTed (20), porei (20), porkandcheese (20), potter76 (20), preece (20), projectryan (20), pszajner (20), pushkar (20), qiloff (20), quetsch86 (20), qweszd925 (20), ragi79 (20), rawrawr (20), redoctor (20), regina\_s (20), riese0460 (20), ripleyblue1 (20), robynjoyce (20), rogeragc (20), rubyj (20), sagedave (20), sarahbeth1994 (20), sarvotham (20), saschanaz (20), savetheeyes (20), schupsteel (20), sciguy (20), seant2389 (20), Shamata (20), shambaug (20), ShowJump (20), shporang (20), sierrafast (20), skeletonkeyfx (20), skys899 (20), sleeperagent (20), smithn14 (20), snowmanboger (20), Sonny301180 (20), Soteira (20), SpazTasticZA (20), Sprasta (20), ssell12 (20), stopa (20), sulo\_aktas (20), szafro13 (20), Tatien (20), tbvjwodn2 (20), techdude (20), tessaedgar (20), tetley12 (20), thomasgk (20), thunderpete (20), timmey9 (20), tiz (20), TNEUZIL (20), ultrahighs (20), Utamey (20), valter (20), venusnhj (20), Vermus (20), Vervayne (20), vgubarev (20), viper13 (20), vivienn (20), whdbshgsla (20), Whizzey (20), Willowgurl (20), wndsha (20), wo (20), xxdjdx (20), Yetimon (20), yoyojo721 (20), zac8151 (20), zodiac (20), zoop (20), 11andersonb (19), 57990 (19), 73lang (19), Abigail (19), ahallock (19), al45424 (19), aloriya (19), alvmarkov (19), amhartung (19), Anaereas (19), Anahi (19), angeel (19), anonymous563 (19), Antonio\_DOnofrio (19), Apoxx (19), arator95 (19), arbart (19), AsinineMetal (19), astraloid (19), ayley (19), azrael.42 (19), Banana98 (19), Beebleprox (19), benben236 (19), BeniG33 (19), Berndii (19), bgaeddert (19), bhweber (19), Bigdatacomputer (19), Blacksheep33 (19), bluey (19), bonooru (19), borinsky (19), braddenn (19), bubbafightsunlim (19), bubola (19), bucz3r (19), Camatius (19), CarlosTheHitman (19), catface78 (19), cavitation (19), CedricSU (19), CheesyJelly (19), choi3547 (19), CLDP21 (19), cludyd (19), coelacanth (19), coralreef (19), CR\_10 (19), cr6012 (19), craigy (19), cricket0303 (19), CYTOCROM (19), d4rt (19), daan1201 (19), danatomica (19), danyratedf (19), DarkSquirr31 (19), daveinaustin (19), deepakjnath (19), Derragyn (19), dIce (19), digital.droplet (19), dioneuty (19), DoctorZ (19), DonSchnipsel (19), Doro22 (19), doughertym3 (19), dwood0403 (19), Eason (19), ebrower (19), EdgeChaos (19), efilon665 (19), emijoh15 (19), emount (19), eosliebe (19), erik.almasy (19), Erika\_Haddock (19), ernani.p (19), erratton (19), esteban.cordas (19), eugeneect (19), ex3n (19), fabiomarroni (19), FearlessPaperTiger (19), fliegenpilz (19), flo\_w95 (19), FortuneO (19), franjogu2994 (19), Freud (19), fung (19), gabhahn (19), gent (19), gfk1978 (19), ghosty\_be (19), gildon (19), gkfkard (19), gksckdgm211 (19), gmduma (19), godogsi (19), goldenlionace (19), greek\_armenian (19), guacamoleinmyshoe (19), gusdlf0211 (19), haha524a (19), hansol (19), Hattoff (19), hdijulio (19), heki (19), helaces (19), henry.hirsch (19), hobeem1992 (19), hscvyj (19), htorres412 (19), huyounggam (19), HwangSeChan (19), hyun326 (19), iron\_skin (19), itegulov (19), ivette (19), j410725 (19), jamieb1968 (19), jckan2 (19), jdhplus (19), Jebisu (19), jeenacadigan (19), jefolicr (19), Jegir.Doski (19), jeno1200 (19), jeremyvicencio (19), jklas (19), jksupernun (19), joaopfsilva (19), John\_Doody (19), johnzoidberg (19), jooan123435 (19), joseacc18 (19), jpbel (19), JustAWorm (19), kacyk (19), kartov (19), kaybet (19), killerbee (19), king44king (19), kippy36 (19), kjb2885 (19), kklaczyk (19), kliepins (19), kmasterdo (19), kmborin (19), Kurisu19 (19), Laddie (19), lawhite (19), leblanc.nicoled (19), leenark (19), lefarrell (19), Legolas0813 (19), Letendre (19), LiliXP (19), littlett242 (19), lizlo224 (19), ljh7814 (19), LlywMiner (19), lobalm (19), logicalnoise (19), logicbomb (19), loly-poo (19), Lone (19), LordPadfot (19), lrspector (19), LunaLimbic (19), lvlup1910 (19), m0nstrz (19), macldirf (19),

magicmic (19), marekventur (19), marie\_s (19), mathmom (19), MBoticano (19), MCL (19), MelanieSimone (19), memery\_uag (19), merceuk (19), metalaxl (19), mghoopes (19), MichaelONeill (19), migueldc (19), milhouse (19), minderkat (19), minlau1887 (19), Molkje (19), monsaki (19), mysphan (19), ND (19), Nenks (19), nfb1401 (19), nhm0213 (19), NoahStone (19), norea (19), nth256 (19), odeya (19), omk2477 (19), openize (19), Origami1 (19), oumuo (19), peeves (19), pieman (19), pipec96 (19), pop91 (19), psychonym (19), puffydoo (19), PvPig (19), raifteri (19), RainboDash5120 (19), ranchgoddess (19), rgsthehird (19), RicardoIglesias (19), rlaalstjd (19), rogergrey (19), romut (19), roukess (19), runedemonic (19), ryanwhho (19), samlam8 (19), Santos822 (19), Saule (19), scheffela (19), Schutze (19), seantrue (19), sehyun03 (19), serisgab (19), sgirard (19), shr4180 (19), shutch3 (19), Silent\_Arr0w (19), skortch (19), slmndr2513 (19), slyworme (19), Smec (19), smsunarto (19), sneakerseye (19), Socratis (19), spoty (19), squand (19), stangelj118 (19), starfish1222 (19), stephaniemar (19), sternenfreund01 (19), stjmarsh (19), strrranger (19), sufferingrex9 (19), sweetpotato64 (19), tanaypatri16 (19), tclay (19), terrapin2 (19), thammuz (19), thanos (19), The\_Italian (19), TheDerpKnight (19), TheDuchess (19), thegamesblog (19), thejohnhoffer (19), trishinok (19), tsbasics (19), Tweve (19), UndyingAngel (19), valhart (19), Vanbake (19), velcrobot (19), Vishwajeet (19), vovvus (19), vtalikka (19), wayneis (19), west12 (19), wiredeye (19), Worldleader (19), wroscoe (19), xanderw (19), Xankari (19), xiongmao96 (19), xtaegunx (19), yoshi303 (19), yuvius0321 (19), zeekilluser (19), ZoeBella (19), zxcv756911 (19), 4B (18), aaziz123 (18), ae6sr (18), aeichmann (18), aellis2015 (18), alexandrafreeman (18), Alicium (18), AlxRstr (18), amalius (18), amoylan (18), Andrea\_fenix (18), anileah88 (18), anndreea (18), another\_star (18), AntonioBouza (18), apsydelon (18), arcodetejo (18), Ardam (18), ariared (18), artess1 (18), asbowen (18), AScheps (18), atacata (18), atpattersonfl (18), badpunman1 (18), bengal1 (18), berdo (18), bindschadler (18), BiologicalMe (18), biorobot9 (18), blin4250 (18), bosung (18), brian92101 (18), brock (18), bryson (18), bwalker3000 (18), ccph (18), cgbriggs (18), chanu (18), charkosh (18), choejongwon (18), ChrisTozer (18), cientifico (18), cirquedeohhey (18), cj22c (18), ck9421 (18), cky2433 (18), clehwoman (18), cmthomas322 (18), Commun\_Era (18), composer717 (18), cosmotrees (18), crookedspider (18), crzyred (18), cwilliams194 (18), daneweasel (18), DanielKaravolos (18), danielskng (18), danja (18), dannas (18), darthpfc (18), davidahopper (18), DavidTJ (18), dbsrua0523 (18), DEAGS3000 (18), demh (18), demonic21 (18), Derecus (18), designruid (18), dgallichan (18), dieval (18), dlrnmffm (18), dlwngh1 (18), DoctorChris (18), dsingh (18), duddnd012 (18), eacron (18), earth8845 (18), ecosan (18), edizzle (18), edmel15 (18), Ela137 (18), elizwoot (18), elua (18), Enke (18), erichamlett (18), eskimocody (18), feki1409 (18), FelizFelix (18), ferret (18), fezzybear (18), fh2275 (18), filipeyro (18), Fortuno (18), frameshift (18), freak0123 (18), gabriemw (18), Gallo (18), game123633 (18), gamecockslp (18), gbvrc (18), gembol (18), gerard\_engelage (18), globecasino (18), gncgnc (18), godghoti (18), gowoboo (18), groovyjet (18), gunedown (18), haakec (18), hannahftw94 (18), hasj1017 (18), Hay (18), HBrucelin (18), Heidycarranza (18), hellokittypirate (18), HelPer2 (18), Henrii (18), Henrink (18), Hesulan (18), HigaaraNakamura (18), Hitch\_Flatfoot (18), homer.kne (18), honbiobke (18), hong22233 (18), houcklg (18), hugolopes (18), hui0518 (18), hutch (18), Iannis (18), ikarus13 (18), ilikepie3.14 (18), insert\_brain\_pun (18), IsabelOteroS (18), Izayoi (18), izziey (18), jacek150 (18), JackDown (18), jagath (18), JakeBardwell (18), jakesg5 (18), jbarrow (18), jessi (18), jinriguang (18), joans34 (18), jodysmith (18), jonparks (18), jpeters577 (18), juric (18), kamilowski (18), kan4933 (18), karolina1307 (18), keepin2 (18), kefir (18), kelen303 (18), Kenza (18), keos16 (18), kerionse (18), kexmonster (18), kioya79 (18), kitka (18), Kittels (18), klaguarda (18), kobesky (18), korealjr (18), Kovikus (18), kri5 (18), kristian24 (18), krogie (18), lanze (18), laugherguy (18), Laurane (18), leasha (18), lee21015 (18), lennodo (18), lesson1004 (18), lifesurfeit (18), lisa\_h (18), lisas (18), littledogboy (18), llenglet (18), lubernatalie (18), lupusfavst (18), lynstagator (18), m\_cfullerton (18), Macska (18), madfield (18), madmax410 (18), mags08 (18), MasterMarcon (18), MattOstgard (18), mavis (18), MaYiLagann (18), mfkr (18), microdee (18), mikaa88 (18), miniHorse (18), mlepley (18), Moneek (18), Moniacom (18), MorallIntentions (18), mrcrois (18), murrow (18), mutare (18), mvmoya (18), Nagher (18), naub (18), neurogarick (18), NeuronBoy (18), nhoj (18), nils.schnabel (18), Nirbhay (18), nkd2133 (18), nmodem (18), NodEngineer14 (18), oldfrith (18), oofredrikooo (18), orgunworn (18), Ott3r (18), particularimages (18), penman240 (18), peter.lisak (18), pfry416 (18), phantomofthehanna (18), pimamede (18), Prelok (18), qwerty123 (18), qwertyPlayer (18), RachelM (18), rainesteele (18), Ramyareddymara (18), realitychemist (18), RedHairedBride (18), reecemoneyman (18), Renlore (18), Reyfil (18), ringoboy (18), rjp (18), rubberbumm (18), s\_zwon (18), sacol123 (18), samaa (18), samb5678 (18), Sampurna (18), samsaver2 (18), sawei317 (18), scesw1 (18), scruffypuppy84 (18), selenir (18), separk15 (18), Shanaelb (18), shibadruid (18), Shie (18), Sir\_BluGoo (18), SirTalkALot (18), skyrim\_king (18), skysurfer (18), Slonce (18), snorthway (18), spacecats (18), spencerrw1 (18), splurt (18), Sqasher (18), synnada (18), tarquilu (18), taternewt (18), taxp0215 (18), tdrews (18), ThePacMaster (18),

thieum66 (18), tiagostohr (18), tkdgjs0516 (18), tkdgur0642 (18), tmsmyer (18), torr (18), tortizgarcia (18), truth0r (18), ttoo90 (18), tubergibbosum (18), twin3636 (18), user2258 (18), vacrin (18), valeriebenti (18), valeves (18), Verkku (18), victoriaac (18), Voicer (18), websurov (18), wilsehn (18), Wist (18), wonjinnam (18), Xoannon (18), yannyiing (18), yebbi2002kr (18), yesgmltmd (18), YhSteven (18), yoonyh (18), Zecory (18), Zendico (18), zenelite (18), zona64 (18), 12374808 (17), lepi (17), 9278bj (17), 99john99 (17), a1lfred (17), aanayate (17), aanewalalal (17), ab3451 (17), adamj57 (17), alex118 (17), Alexander0 (17), Allutje (17), alvaro.tobar00 (17), amann000 (17), angelina1125 (17), anji0804 (17), Anna\_Nikita (17), annagrants (17), apple2 (17), arbusowykrolik (17), arcien (17), arivx (17), arokon (17), arr139 (17), ARSCON (17), arsmi6975 (17), ash328 (17), asi9 (17), askatrus (17), asthdus (17), attack193 (17), audiso (17), avan (17), aydin (17), bavaro (17), bec97116 (17), biopasbio (17), bizzielorden (17), bobbert (17), braindisease (17), brainhole (17), brdong (17), BrendenLech (17), brompel (17), bxsephjo (17), CameronFlegg (17), carmacek (17), Cary713 (17), cassies\_file (17), cat8610628 (17), cblair900 (17), Cefisher (17), chadonicus (17), Chaifizz (17), CharTar (17), CheonU (17), chillfactordan (17), codonnell (17), coldhot (17), COMPLETEFIELD (17), confusediwire (17), costly (17), creays9203 (17), crystalheart (17), daegsmom (17), danhosan (17), danis (17), dankmush (17), DashiePon3 (17), DaveRHarris (17), DavidERod (17), davinbradley (17), davubu (17), ddil (17), DeBazoogiaBird (17), deebo (17), deji (17), demeter628 (17), denishordienko (17), Devyt (17), dexis237 (17), diegoveranc (17), Doctor1156 (17), dong3683 (17), dr\_alon (17), Dr\_Octopus (17), dragon12 (17), dsmith (17), efl10 (17), EKPE84 (17), elichad (17), elizabethgs (17), elliottebbs (17), enr987 (17), erangkr (17), espinobj (17), Eunbee (17), face9 (17), Fajtak (17), Felix\_J (17), filipe (17), flmz (17), FlyManPL (17), flyppi\_007 (17), frankyt187 (17), funnypinky (17), fwillett (17), gale.cannon (17), gamid (17), garmonbozia (17), gedee (17), gernupe (17), gigagarfield (17), ginger0215 (17), gkevinen5418 (17), gnyarlathotep (17), graywolfs (17), GrellFlamBoby (17), griffsterometer (17), gsantillana97 (17), gunslinger18 (17), Hana (17), Handerson (17), hantwigg (17), happychanbb (17), Harmony1 (17), havskilpadden (17), haxxbit (17), hektorsky (17), henning334 (17), hiitsjustmee (17), Hollymck (17), honghon486 (17), hth (17), I3ladeDragon (17), ianh (17), Ibyys (17), Idristhetardis (17), indigosak (17), Its\_Da\_Hess (17), Jackwalton00 (17), Jaeyong (17), Jandro19 (17), Jasminechoe (17), jcoryell (17), JeffreyFBurns (17), jhonnycolombia (17), jin8495 (17), jjyoung0601 (17), JKastler (17), jlindley3 (17), jmolt (17), joemichail (17), johanka5 (17), Johanz (17), JohnJC (17), jongrewl (17), joyshrugged (17), jrird (17), Judi.peters (17), junemae1 (17), junhyuk9917 (17), junui0402 (17), k8portalatin (17), kainsrache (17), karas2093 (17), kelly\_mentalgarbage (17), kevin1kevin1k (17), khaurum (17), khg0223 (17), ki\_ya (17), kiki3338 (17), kill3r\_duck (17), kingclub (17), Kingmel3 (17), kingpg (17), kinox (17), kkintis (17), kkkim4541 (17), kmonster (17), knitnut6 (17), kqxr (17), krebs5302 (17), kripple (17), ksberton (17), ksmith9109 (17), kukumuzu (17), kylelv (17), L337krew (17), lance1ot931225 (17), larsyoyoyo (17), laurareeve1 (17), ldcsgib (17), le\_insomaniac (17), Leif\_S (17), liana (17), lilsunnybee (17), lion23 (17), lisamarie\_mo (17), Lmao (17), lmn93beo (17), lollikus (17), madde (17), madlabboy (17), magicat777 (17), mahjo (17), Malaria (17), marissabw31 (17), markrubs (17), markyoxon (17), matasuko (17), mattbain (17), mattgu74 (17), mayanightstar (17), mesidin (17), Metaclint (17), micmiccarcar (17), mikecanis (17), Missie (17), moosiking (17), mrwijk (17), mschneid (17), myturtle8875 (17), Natalya (17), nawre (17), NazcaOS (17), nazywam (17), Nhi (17), nick4767 (17), nicoley4848 (17), nidhi (17), nihilisticneuron (17), nolanrmccarthy (17), nscogin (17), nsusag (17), odaros (17), Odo (17), Okachi (17), olinha (17), Ororo\_LeBeau (17), Ovoroboro (17), papasanji (17), perefou (17), pexandapixie (17), pigrew (17), Pinelopi (17), plagiaat (17), Plenum (17), pocopoco (17), popdacion1993 (17), PotatoCloud (17), PowerLiam (17), poxus (17), puk840 (17), quanksor (17), r12s (17), ramq1w2e3bd3 (17), raquelbb (17), rayoult (17), rcoile (17), reezma11 (17), rehevkor5 (17), renovatio50 (17), rensthys (17), retnamus (17), rfv56 (17), Rich86MM (17), romainboonen (17), runnergirl0117 (17), rzarifa93 (17), s69 (17), sadykh (17), Samtex (17), sandrider (17), sasrob (17), semi\_deluxe (17), SeoYuri (17), shadow66 (17), shady\_arc (17), shanksgavin (17), sheet\_music (17), shinhjjang (17), ShizzzFox (17), shogun888 (17), shtychkn (17), shun1119 (17), silver72 (17), silvia (17), sisyphus (17), sivinjski (17), Skiddzie (17), SKPapillon (17), skypilott (17), skytiger (17), Slaigh (17), Slinger1337 (17), Spire0 (17), SplitShockVirus (17), ssstessa (17), SStirland (17), StRollfinke (17), swan (17), t4terrible (17), t8killer (17), tagtooth (17), taiteb (17), Tan (17), Tessa (17), Tfo7 (17), TheKing (17), thestaticstar (17), ThomasSon (17), tiny448 (17), tipped (17), tjddy153 (17), toenke1 (17), tlabue (17), to0605 (17), Tomahawk (17), txau (17), ulis (17), utopianfiat (17), Vaggos (17), Veit\_Grabe (17), veradux21 (17), viperrt33 (17), vivianvance (17), vlzhffh456 (17), wanganboamber (17), Werner (17), whtsmyprpus (17), wiedi (17), wiesna (17), wnsdlf420 (17), wompuscat1965 (17), wouter\_vdb (17), wowls112 (17), xjc (17), yambda (17), yeehaw (17), yg12yg (17), Yoru (17), Zardukah (17), zdallin (17), ziggs (17), zincdz (17), zzwzdcw (17), 118602 (16), 4wldrift (16), 5555si (16), abarejo (16), aeth (16), aflawedsystem



(16), afsd1523 (16), ahgnaw (16), ahornholzurlaub (16), alexanselmo (16), anaconda (16), and\_d (16), AnnaFortuny (16), AnnaKimmy (16), anuran (16), apfkd (16), arpwer (16), arygophe (16), asefr02 (16), ashevillegemmine (16), Astropolix (16), atobi16 (16), AtzinFranzi (16), Ban1 (16), baustin (16), bcolton (16), bemmerichs (16), bendani10 (16), big7753 (16), binanielsen (16), blakewoodman (16), Blitzkreig (16), blurry8907 (16), bobfinn (16), boverpho (16), bweaverww (16), cabb99 (16), Cake\_kwan (16), callumhay (16), CarsonGoeke (16), ccesporlas (16), cccrzz (16), CDFS (16), cemav (16), choijunseo (16), ChrisChV (16), christina.murray (16), chrono948 (16), cksdn0902 (16), clarities (16), clavo (16), ContactSupport00 (16), CptSpud (16), Cryptotech107 (16), cye604 (16), czallicja (16), dabailey (16), DaBrainiac (16), dacapoday (16), DanielLesman (16), david425 (16), daydreamingmutant (16), Dazll (16), DeathBlade (16), demian (16), dg\_ (16), dgen0124 (16), Diane\_Bent (16), diel0929 (16), disciplez (16), dkdud936 (16), dkistema (16), dlfg3380 (16), dlwngus1129 (16), Doctor\_Jed (16), domestar (16), doyourhomework (16), Draan (16), DRP (16), druhartley (16), Duntorah (16), dydgus4982 (16), dzuniga (16), E\_Sark (16), ebbunmam (16), ebudan (16), ehenroom (16), ekztal (16), EM\_da\_NS (16), emilco (16), Emoshun (16), emoutsatsos (16), empact (16), endo2021 (16), Erbmyc (16), eyegor (16), eyewire444 (16), Fajcia (16), Farakadabra (16), fdsa (16), Firas\_Alsaid (16), Florian14maier (16), florin (16), FredFredBrgr (16), fruityyblue (16), gabrielpodeanu (16), galton (16), Gbabak (16), Gegenbuhne (16), Geoff77 (16), george111 (16), gerard.rve (16), Gevorg (16), gingerroot (16), Glebka (16), greydov (16), groovedk (16), gurpal (16), h092211 (16), hamcio (16), handok0101 (16), hannahgwilson (16), Harbour\_Square (16), havoc86 (16), hayhay230 (16), heegun1014 (16), Heinz132 (16), helloworld77 (16), hephaestion (16), hermione (16), herrspielmann (16), hoblarn (16), hstubby (16), huhunhung (16), hvdh (16), hyunjeesong95 (16), Igolmaio (16), ilikepie (16), israel (16), J.Leander (16), jamiebeano (16), jamix (16), Jantens (16), jbrau2019 (16), jdragoslavov (16), Jeff343 (16), Jeffreyonline (16), JennyT (16), Jesse\_Prakken (16), jessicasprague (16), jigsawmonster (16), jk0364 (16), jmeh1024 (16), Joannita77 (16), joe (16), johan\_as (16), jrossiter (16), jtgdg5 (16), just\_micah (16), Justinp (16), justplainloopy (16), jwm9765 (16), jyeomans1021 (16), jzmxhs (16), kadhaleen (16), KaJaZnam (16), Kalimeilani (16), kasa (16), KatieNitschke (16), kayrosedoodle (16), keahirada (16), kensuke (16), kestrel (16), Kiliandeca (16), kim7man (16), kimsese0 (16), kimsinsung (16), kjgg (16), kkh8816 (16), kkotchanski (16), kmgold (16), Komanyan (16), kookscloud (16), kpt\_fox\_trot (16), krmkskn (16), krs2 (16), Kypstotic (16), landro (16), Landselur (16), lanekiffin (16), laura.e.callan (16), Laxbro (16), leeda2799 (16), lerro (16), lesbihonest (16), lhh4993 (16), Lhingril (16), lienbosmans (16), lilcodex (16), linguistsrwe (16), Linsu (16), LisperWhisper (16), Lisse (16), LivingWithDepression (16), lizengland (16), lizzo1 (16), Infakharzadeh (16), LordUniversal (16), luizadri (16), lumprvt (16), lydia (16), lyssi (16), Maggie1Mark (16), maikking (16), malamute84 (16), Malchut (16), Mandzukic (16), mapper0310 (16), mathiasdehn (16), mavcraen (16), maximilien (16), Meissa (16), Metalgirlz (16), mikearends (16), mikew (16), miles.turpin (16), miretia (16), misa\_laree (16), MissingNOPE (16), mitico (16), mmm8878 (16), mnm (16), molnarlac (16), moonwalker (16), morph (16), mpsland (16), MrBlargh11 (16), mrivera0709 (16), msswchoi21 (16), mtb68 (16), musiqueelle (16), mwags3373 (16), mycar5351 (16), MyraByrom (16), n0rbert (16), nanonymus (16), natali.farran (16), NDunn818 (16), neoseho (16), net2700 (16), netmage (16), neurojess (16), neurojess1 (16), Nightinggale (16), noheliajimenezv (16), Nomax (16), norman (16), Norrius (16), Nortiz28 (16), nspop (16), o\_okk78 (16), OkiDoki (16), Optikes (16), Oriolid (16), ouyo (16), ovidius13 (16), papabiloulou (16), parkga14780 (16), parmiterm (16), pegie (16), phn1998 (16), prashast (16), problembaer (16), PropertyDock (16), prowlerath (16), pscott99 (16), psheldon7 (16), Pudd (16), Raceimaztion (16), radugrosu (16), rdd0712 (16), real3369 (16), RedCormrad (16), Remidius (16), rentzu (16), reservoir\_ri (16), rhibbitt (16), richardofswc (16), rjs36 (16), rockefeller (16), rutgersnjdk (16), Rylae (16), rzowada (16), s210798 (16), Sail421 (16), sailor (16), salinecjr (16), sarahstslaughter (16), SASARA (16), sasha52787 (16), sault\_shaker (16), scenor (16), scooterj79 (16), scrumpy (16), seabass632 (16), seowonwoo123 (16), seslonedz (16), shakefu (16), shamaniac (16), sharksting (16), shepan6 (16), Sian (16), situomeng (16), skype0714 (16), slee1681 (16), smadera (16), sobqx (16), sondradlee (16), SopValk96 (16), spencer999 (16), spidersong (16), spiritka (16), splu (16), stephenpin (16), steve\_sollars (16), stylpe (16), sugar5STAR (16), Sunnrain (16), sunnydale (16), sushimama (16), SyrusVir (16), TAERGEHTETAN (16), Tallowy (16), tamsin (16), tehbaer (16), Tesla (16), thakandar (16), theczar (16), thedj (16), thekingcritic (16), thermotoga (16), thesupernoob (16), theunderminor (16), thomashoulden (16), thompson\_kat (16), Thorin (16), tlaalstjq722 (16), tladudtn (16), Tola (16), toml1989 (16), tori93 (16), toylee83 (16), treeswitheyes (16), tsepaka (16), turbogans (16), ultrapenguin82 (16), Upiter (16), valacirca (16), VICIOUX (16), vithcartel (16), vlclvbdj (16), waterrimp (16), Waters175 (16), watrool (16), wax46 (16), westgarden (16), whehgus112 (16), whyi (16), willoland (16), winnichoco35 (16), wiscogirl93 (16), wizzo (16), wolfangel667 (16), Wolgs (16), wonseochoi (16), Woops (16), xerossia (16), xpg2002 (16), yckim5g (16), years2live

(16), ygeorgie (16), yksh0909 (16), yosephmetal (16), yotho (16), yuea8704 (16), Zafod (16), zapata2 (16), zdog1922 (16), zeaglesfan (16), Ziami (16), zkart12 (16), zwat (16), zzAndi (16), 1032442062 (15), 1243510891 (15), 2222 (15), 35thu (15), 452charlotte (15), A11668681 (15), aaronkrol (15), acamto (15), adudemamx (15), aguynamedryan (15), ahwave (15), ahyde4901 (15), akownerz (15), al987321 (15), AldoEspinosa (15), alicia (15), aliciamkwon (15), alonzotg (15), aminilitti (15), andrew25900 (15), andrewjt1 (15), angelic (15), anonymousx (15), AppleDash (15), apraetor (15), Aran (15), arduanne (15), arking (15), ArtemySokolov (15), AryaOrchid (15), ashleybear0739 (15), Asleepmoth (15), astaric (15), asuczynski (15), agosto (15), Aver (15), avocado (15), awaw (15), axell101 (15), babo (15), babydoll (15), babygirl83 (15), BamaBear36 (15), baptiste.terpo (15), Berdes (15), bigalpha (15), blackfolder (15), blind\_lem0n (15), Blinker33 (15), bluefirehome (15), bobcats184 (15), bobstring (15), boomheadshot (15), brucekim007 (15), btwhitney (15), bubalou (15), bumpycat (15), bunny12 (15), Byeol\_gona (15), calkhiteeb (15), calx (15), cancer (15), Cao (15), CarlJW (15), carlosryanez (15), catterer (15), ccharlton (15), cephalopod (15), chado7217 (15), champion (15), Charissalam (15), charleszhuang (15), chipschick (15), chris\_kok (15), cmglee (15), color (15), Conner (15), coolsil (15), copperboomer (15), crazy\_wildboy01 (15), crazyaugo (15), D.wyatt11.13 (15), d3athg0dkill3r (15), damianos (15), dammot87 (15), Darkni (15), David002 (15), Dedalus (15), defford (15), delgarus (15), dfajar2 (15), dice0083 (15), dilettard (15), dinomeano (15), doctorwhofan560 (15), Dominikaaa (15), dominions (15), DonaldTrump (15), doomwarrior64 (15), ds3mim (15), dsq2127 (15), dubbc (15), dubiousdueler (15), ducksd (15), dwitte (15), eabrunelle (15), echo\_mike\_alpha (15), ecukhk (15), elking10 (15), Elsterhombre (15), emilygolden (15), emilykila (15), emilythedork (15), enderseye (15), eng1112 (15), eriyca (15), f\_08 (15), fabiannaga (15), farlstow (15), fbfr91 (15), finalobserver (15), fishingman (15), florianm (15), flyingsquirrel (15), foolishsparrow (15), fossmardi (15), galaad974 (15), galiped (15), General\_McTard (15), gengf (15), GeoffreyK (15), ghffhtm (15), ghkwjd0420 (15), GiacomoValle (15), Gjmurray (15), grushina (15), guigcam (15), halfmoon (15), haw081 (15), hebealexander (15), helfbone (15), helli.pirelli (15), hernan101 (15), HKDittrich (15), hoovco (15), horizon (15), Houseki (15), huangtone (15), hungrycaterpilla (15), hyebin0508 (15), IanBanks (15), ianr (15), ibreaz (15), ifail (15), iiron (15), impact0110 (15), inky\_petrel (15), j7132808 (15), jackeymackson (15), jaykaysan (15), jbroer (15), jem62 (15), jennycade (15), jeom7851 (15), jessicampace (15), jfields5 (15), jgilchri (15), jgz (15), jhha888 (15), jhju2000 (15), jihoo1410 (15), jimmymk (15), jinjaeho (15), jlin703 (15), joyle (15), Jose253 (15), JoshO (15), josu0863 (15), jovy\_w (15), JozefW (15), JpcThundersword (15), jscheuber (15), julkss (15), jw3810 (15), k1llua (15), kabrox18 (15), kai\_lai (15), Kalama7\_SPHL (15), kamov (15), Karen13 (15), Karistocrat (15), Kartha (15), kcm04 (15), KDHarrington (15), kermike (15), khjrlagywn (15), kingxander123 (15), kijjji2 (15), kjj2716 (15), kktham (15), kpp0903 (15), kristify (15), KSJ (15), kylethompson41 (15), kynes (15), Laetitia (15), lalalana1114 (15), Larry\_Kaplan (15), LasVeg (15), latte164 (15), leamarie (15), leandrog (15), leilacm (15), lelouk (15), lennihon (15), leohelm (15), letmetrypls (15), Lexille (15), lhittle (15), lhs4869 (15), liamgerman (15), light\_matters (15), liviu\_m2002 (15), LoopBack (15), losredorke (15), louisrabin (15), lourie (15), Lugimax (15), Luis1 (15), Ivibrook (15), m8martin (15), madbadger2742 (15), magicjewel (15), mahorne (15), majlo (15), makibo (15), Malassasaur (15), manthecas (15), mapjockey (15), MarshallStacks (15), Masterben135 (15), MasterROBO360 (15), mazingmaddy (15), mazurovEV (15), Mccara (15), mcintirekc (15), meaningoflife42 (15), Melanchtron (15), mendoza (15), menkiboj (15), merknu (15), meta4 (15), michae (15), min04029 (15), MissingBrony (15), mitaraiB (15), mix\_gom1115 (15), Moppilie (15), moswanted (15), mrcool (15), MrZero (15), mugkeabi (15), Naibrot (15), nakarooroo (15), nakratz (15), narioh (15), nattychick (15), naturegal (15), ndadina (15), NeonGE (15), neurogirl39 (15), nex\_test2 (15), nicolas.howard.mathe (15), Nicole\_ (15), ninesens (15), norandall23 (15), novelapproach (15), oakles (15), odinkral (15), ohyunju93 (15), Olweg (15), onetwothree (15), origamime (15), pabell (15), pat1 (15), paulinacabrera (15), pdurve (15), peacexo (15), pedrokech (15), penguin (15), Phillevis (15), phillipdemarest (15), philosomatiker (15), pk2600 (15), poiin90 (15), pokepika (15), pokie (15), polycom (15), pompek92 (15), prestons (15), primeorder (15), profdepipo (15), qscwdv2005 (15), Quadsar (15), r03plas (15), Rachi (15), RafalD (15), Rahm (15), raringcoder (15), rashmika7 (15), redoliv (15), rensie64 (15), respect (15), ricardolucas (15), ridiculosity (15), RINERU (15), rlfrlls (15), royalrose (15), rtoip (15), salfordphil (15), Sam007 (15), sangel123 (15), sapphyre (15), saturnfred (15), sbolourchi (15), SC89 (15), Scanlia (15), schnurribunde (15), seaside650 (15), seb.lim (15), serial (15), sernalc (15), shartman (15), shelbi (15), shj0201 (15), sinabasti (15), sinvictus (15), sj1537 (15), skrobanekj (15), skycat (15), skyeward (15), slvract (15), snlinol (15), sofiacoulson42 (15), soo (15), soyulim (15), spel71xper (15), sphycte (15), SPQRRQPS (15), srsrm0123 (15), stefan.pantea (15), stewart (15), sunev (15), Sunkuan (15), SunshineDew (15), svok13 (15), td33 (15), TechnoViking (15), teza (15), thank (15), That1Guy2 (15), theaggro937 (15), theboss (15), thelandstander (15), thenn45 (15), TheRe-

alPhilipp (15), Ticna (15), TimAndrews (15), timothyfoo (15), Tinker (15), TitaniumC (15), tjdwms\_07 (15), tjannone (15), tjwl0418 (15), TopherT (15), toxo (15), Toyzealot (15), trentonp (15), Trukken (15), tigermomx2 (15), tye45 (15), uhwa (15), uotz (15), vandag (15), varco (15), Veneniferous (15), verasue (15), vidawells (15), vidurnaktis (15), vladimir123 (15), votrelec (15), voyel (15), vroeje (15), wackyzane (15), wforbess (15), whdms6104 (15), wilelmina (15), willdebolla (15), williamtest (15), willowbyrn (15), wtTu (15), X360EYES (15), Xikitina (15), yeriel29 (15), yetiontheloose (15), yje941 (15), yoasienk (15), ystebliszt (15), z\_eliran (15), zamma2337 (15), zarik (15), zaybe (15), zdaraveak (15), Zepsuty045 (15), zhenxzheng (15), zhushun0008 (15), Znarf (15), Zoodle (15), zyphyrus (15), 1027sb (14), 1056967887 (14), 1093265042 (14), 1722818 (14), 3044546 (14), 55555555555555555555 (14), 6exG (14), a\_jasienski (14), a22brad22 (14), aarondelarain (14), aaronkirsten (14), ab6053 (14), abarber3 (14), Abstro (14), ackander (14), Acsa (14), adrenalin7 (14), affieotunla (14), agbaphomet (14), agentdresh (14), ajpleasants (14), Akaiame (14), albioncutter (14), alexjjong (14), alianos (14), alkis (14), allstorm (14), alxfalcon (14), an12 (14), AnaC (14), Andrea\_Piseri (14), andream (14), andrew (14), annesrat (14), aofficer (14), arisgotskills (14), arpsazombie (14), aruzan (14), aschampion (14), asdfgd (14), ashleyporter (14), atirager (14), autrankar (14), Axons (14), azetidine (14), azuren850 (14), barry9 (14), barrynmd (14), bcmjax (14), bdunn (14), bellethiell (14), bentemjensen (14), bexx (14), bharper (14), bobthegreat2012 (14), boyoboy101 (14), bradleyprice (14), Brasa (14), braydenc (14), Breksch4711 (14), britoboy (14), butlertron3000 (14), caeboa (14), cant\_find\_me (14), carlos332 (14), carrey (14), carter\_weinzierl (14), CarterJimmy (14), cass4620 (14), cava (14), cezn (14), ChaotiC (14), chinaev (14), choeunbi45 (14), Chois0105 (14), Chrissy82 (14), chromaticlady (14), ckdgus1053 (14), ckwjddlf (14), Cool55wow15 (14), corentiny1 (14), cpyang (14), crasher925 (14), crazydyl119 (14), Crazylily567 (14), crimsond (14), crispy (14), cupolagirl12 (14), dagmarinho (14), danicaKvetova (14), darosmatteo (14), darr (14), ddemarco5 (14), Delila (14), deltoryon (14), dequ (14), dgw1996 (14), dhu20 (14), dieck (14), dima (14), Dimoan (14), DJOxillat3r (14), dmanhey10 (14), dobhin\_0724 (14), docAroe (14), doctor1570 (14), doctortaehee (14), dodigard (14), dojan (14), dombian (14), dominikaz (14), donagh (14), Donata (14), Donghyeok0518 (14), dontcallmeikke (14), dp4nrw (14), dragongoku (14), dreameye (14), dreamjung7777 (14), drewscow (14), droth (14), DrSam (14), dugui (14), dukes123 (14), dupagirl (14), dw05093 (14), DzikiJaszczomp (14), e33a1 (14), ebbammer (14), echosyp (14), edg0315 (14), edoiks (14), eduardoprdr (14), eedev (14), ehdsn93 (14), ekghks930 (14), elentmont23 (14), ella1209 (14), eogard (14), epentatonic (14), erictopp62 (14), erisa (14), escapado (14), Esqarrouth (14), etaoinspiffy (14), eugene\_tx200 (14), eunjuneunseo (14), everlearning (14), evnander (14), ewb2127 (14), fairycircle (14), farber96 (14), favas22 (14), favone (14), ferretsangle (14), fishi (14), Fleurimont (14), floritap (14), fly.high (14), Flyboy\_ED (14), Francescone (14), Francychu (14), frasersar (14), fx30t (14), gammaxgoblin (14), garrus (14), gava (14), geomuse (14), Gerwayn (14), geyewire (14), ghdehdgus (14), ghostbuster123 (14), Gidraulght (14), gkzjavbxj (14), gnomemullet (14), GOA\_SBea (14), googlit (14), gussay (14), h980108 (14), happystars (14), hayleyb (14), hedge (14), helenkwan (14), HELLO\_CAT (14), henrycho (14), hexbienium (14), Hifloseus (14), hil00137 (14), hjhead (14), hkwoo17 (14), hognusing (14), hoho3008 (14), Hubert\_J (14), hurler (14), HValentine (14), ikkeboe (14), ilovepie (14), ILYASAS (14), inab1606 (14), infinitevoid (14), ingeworm (14), Irma (14), istrul (14), jacejace (14), jack5225 (14), Jacy (14), Jaewon (14), jakedmo (14), janis (14), jarax44 (14), jayday1 (14), Jead (14), jemstone (14), jessa.7.d (14), jinhal2345 (14), jjaros (14), jjoao (14), jm009 (14), joeyjojojr (14), john31105 (14), johnekkel (14), jorge5vVa (14), jorvalt (14), joshuag (14), jpdio (14), jpost (14), jrc2k (14), jsdg (14), Jsteele945 (14), julieeuna (14), jungsuchawn (14), kams696 (14), kanamotu (14), kancel (14), katemarin (14), KathrynCecelia (14), kathypopos (14), katriddle (14), kcm (14), kdh9949 (14), kdtop3 (14), keyzplayer (14), kg100 (14), Khamurdik (14), kieronky (14), kika (14), killerpohl (14), kimjihj (14), kimmo (14), kirby4vr (14), kjl2875 (14), klamp (14), klawt (14), klesk (14), Koachie (14), koreplan (14), krubright (14), krull (14), kyy9977 (14), laasya66 (14), lacan (14), LadyJ (14), lamanabie (14), lamprey (14), larwloszka (14), leebyeounghoon (14), lemons132 (14), LeoGnarleyardo (14), leon123 (14), lexicanium (14), lexu (14), leyi (14), liana\_meow (14), LilMagicks (14), LippstadtFreak (14), lisavaughn (14), littleorphan01 (14), livsbones (14), Loran (14), lplgu99 (14), luciditie (14), LuckyJavelin (14), lukyman (14), LVSDelmar (14), lynnstribley (14), machyo (14), Magda83 (14), magills (14), manders623 (14), Mane12217 (14), Manseerat (14), mantodia (14), manugiggslm (14), maraven (14), markell23 (14), marylee1258 (14), mashu (14), max\_2228 (14), Maximum (14), maxxis35 (14), mc\_adea (14), mcerken (14), mcsneber (14), messiahxi (14), miketurk (14), mizbb (14), mkeibler (14), mlawr (14), mlou (14), Mlv (14), mmachura (14), moekel (14), mofa001 (14), mohamedbessalah (14), mohk (14), molarchae (14), molly.mcelvogue (14), momoyeye (14), moni233 (14), mresendiz (14), MrSlinkyman (14), msica (14), msms722 (14), MULTANI (14), mwlong (14), mygreensock (14), mysakbm (14), mztressdoom (14), Naina (14), navihak (14), Nekro (14), neoluigi (14), nergal

(14), Nervuser (14), netiac03 (14), nevduv (14), Neymar\_11 (14), nhs.0410 (14), nido (14), noador186 (14), nota (14), nonagon (14), notexactly (14), novarol (14), nycte (14), ogito\_99 (14), OleksandrVit (14), olemarius9977 (14), onesleeve (14), oreo37 (14), osandia (14), ovoer (14), pannenkoek (14), paxwin (14), pdelvalle6 (14), peacetanium (14), petebot5 (14), Pickle23 (14), pictsiegirl (14), pjh5596 (14), plundyman (14), plusmid (14), polly66017 (14), powdermetalpup (14), pravda (14), priapil (14), prismaticvoid (14), prometheusx (14), pulliam.daniel (14), qinpu0213 (14), qwackdragon (14), ragaduffin (14), raggedangel45 (14), Redhawk529 (14), Reggie53027 (14), reneelee (14), retinology (14), Rfriesen (14), RickSanson (14), rinab (14), Rinn (14), Risa\_chan (14), rkobe (14), rlawlsrhkd132 (14), RobertBenjamin (14), robledo (14), Rontoc (14), ROOM203INMOSCOW (14), rospark (14), rpearcy93 (14), rrdlpl (14), rubai1597 (14), rumbledon09 (14), S3R3NDiPiTy (14), s85246 (14), SammyLT (14), samuelporter (14), santoniou97 (14), sara.salamon (14), Sarah\_Bern (14), seahyz (14), Sebastiaan76 (14), setesh (14), SFShockwave (14), sharonwy (14), shawn156 (14), Shiinon (14), shin (14), shynes98 (14), sierra\_9177 (14), sigbird (14), sikho (14), silkstone12 (14), SilverIce (14), silverliningsara (14), simonmasterton (14), singinlow (14), skittles2 (14), snowleo89 (14), socrates (14), sogin (14), SomehowStillSane (14), songbg17 (14), Sonnrain (14), sp4rt4n117 (14), spriz (14), spyfox (14), srodan (14), ssh1012 (14), stevelieb (14), stomjoh (14), Stuthedew (14), su15926 (14), suckerpunch (14), sungchulc (14), SvdR82 (14), taishan1993 (14), Tatui (14), tcmitch24 (14), tejask (14), tempo (14), terradrenor (14), tetrisaurus (14), thatlittle\_boy (14), thatonecloud (14), theboeh (14), thedude61636 (14), theelamental (14), TheJeff-Matson (14), Thrag12 (14), till1234 (14), timdr (14), tntkd415 (14), tobias19 (14), TrevorT (14), trocky2 (14), trumppy (14), TukaRossi (14), typicalrachel (14), UHFGs (14), ullylove (14), unsined (14), varwon (14), VikramGupta (14), w3m\_essar (14), winter\_queen (14), wis4917 (14), wulf56 (14), xcrin (14), ycm0811 (14), yes123wearedoingthis (14), yhorvath (14), yhyh6930 (14), yoyoboom (14), yul094 (14), Zephy (14), 1047456776 (13), 1075773969 (13), 34253 (13), 3jt (13), 99 (13), a1132271 (13), aargh (13), aaron250 (13), aawood (13), aburtzos2019 (13), adimine (13), aenimalis (13), Airuset (13), akasloth (13), alazne (13), Alcarin (13), AleitMayer (13), alextheangry02 (13), alias (13), alidumb (13), allactaga (13), allencp23 (13), AlyJay (13), Amicus (13), anasiz (13), andrewfm (13), andrewsmt (13), andy0130tw (13), Anilorak (13), Anna\_Valledeoriola (13), antoinecote9999 (13), arobbins (13), arrowheadx16 (13), ashex (13), asile (13), asong (13), autumnzuz (13), avengersdiscount (13), AwooOoo (13), awseft (13), bainesd (13), bazoukiwells (13), bberg27 (13), bboyireto (13), bbrowneod (13), bearsong (13), beckschino (13), benjaminb83 (13), bennett (13), bfishel (13), bigbrinko (13), biodiego (13), Biomelsim (13), Birdface (13), bishara (13), blackkbot (13), bluezerox (13), bmintzer7 (13), bobstevenson (13), bolzan (13), bondpark (13), brainSTEM (13), bsashanka (13), bumcivilian (13), Buzz101 (13), byrondowns (13), callan23 (13), cam21 (13), carrot7833 (13), Cato (13), caverdema (13), cbdavis (13), chan2mam (13), chaomstr (13), chaoticus (13), Charronia (13), chickadee76 (13), Chipper (13), chronium (13), coder\_cp (13), CornishPasty (13), craigo298er (13), crazyvirus (13), Crisany (13), crossfire75 (13), crowzah (13), ctashby (13), cvonk (13), CYHuang (13), cytoeric (13), DabGor (13), dad (13), dagomes (13), dah3th (13), daneos (13), DanEyeWirer (13), dangpzanco (13), Darmantio (13), darnweird (13), DarwinLain (13), davea (13), ddouthett123 (13), deamond213 (13), Delange (13), denizkural (13), dernub (13), devyn (13), dgarno (13), ddbdt (13), dho2864 (13), dicleli (13), dixi (13), djddkgud1 (13), dlgs0034 (13), Dman7 (13), dmiro (13), dylan\_ringwood (13), ecal55 (13), Ehrenhofer (13), elenek (13), elliot627 (13), Elora (13), emills28 (13), emilycs (13), emmett.dorlester (13), Ender.The.Irish (13), enriquevi (13), era (13), erinj25 (13), Erk (13), eruhena (13), eturnerwire (13), ewaa (13), ExpHurtFan (13), ezekielsharples (13), fabian.svii (13), fearfulcorn (13), fghj (13), Flufficus (13), forex (13), fozyy (13), FredricCliver (13), fruitapple (13), gabika (13), GameDragon (13), gamefulscholar (13), gavins (13), gelonsoft (13), genghis19958 (13), George95 (13), Ghost1 (13), Ghoststalker (13), Gilles (13), girly01 (13), glasspi-ano (13), gmariee011 (13), gmilway (13), goddessofstuff (13), grayden (13), greanbeanlife (13), grymghost (13), hacker6284 (13), hafilip84 (13), HansWurat (13), HardyDaytna (13), hargem (13), harshwardhan (13), hasacz13 (13), Headphones\_John (13), hellducka (13), heoni0504 (13), Hoshiko0902 (13), hubbahubba2112 (13), hwang2830 (13), ifeoba (13), iileo (13), ilahyas (13), IndianScout (13), Indigo\_horse (13), indjev99 (13), ini001 (13), ino690421 (13), InquisitiveVet (13), iubns (13), IyandenSun (13), Jaketh (13), Jaldor (13), Jamesn7532 (13), jangeyer (13), jasnovid (13), jbw1969 (13), Jchwhittaker (13), jdemars (13), jeblesh (13), JEmbri (13), JimRaynor (13), jiong (13), jlaessle (13), jmuzzillo (13), jnroth77 (13), JoannaS (13), JoaoFernandesDR (13), jonc88 (13), JonnyM93 (13), jooohn (13), JoseAndresCamacho (13), JoseIranzo (13), joseo (13), joshiboi (13), jpatrickmalone (13), jpkatkin (13), jsdjsd (13), jss78605 (13), JuanEsquivias (13), julien (13), juneseok1221 (13), Juro (13), juste0909 (13), Jutta (13), K.i.a13 (13), k2004st (13), kaka12 (13), Kamelkatt (13), kangin (13), Karhaix (13), karpoc (13), kashmir1 (13), kassandra2 (13), kay\_1993 (13), kazioo (13), Kcmitch6515 (13), keock (13), kerbal (13), Kervana (13), kirium (13), kjsrsys (13),

kk3042 (13), kk5527gsa (13), kongyi (13), kosh271 (13), krotonus (13), kroylar (13), kruegerzj (13), KruluS (13), kwolkers (13), kyutae0421 (13), LadyHawkshore (13), lancetadon (13), LarsOlafson (13), LD2 (13), ldcdev (13), Lder (13), leablabla (13), lhli77r (13), Libeth23 (13), liefje (13), LilleFugl (13), lizachka (13), lkauth (13), logan\_dun (13), louesa (13), louisxie (13), Luisfunes (13), Lyubovi (13), macarena (13), maciek61 (13), mahoimnoy (13), majkelo (13), Major601 (13), malefactor666 (13), mantiaga (13), mare45 (13), marimbaman (13), Marisol (13), marktory0352 (13), MartinLei (13), marylanzerotti (13), MasterMagi11 (13), mat (13), MaximeKjaer (13), mcwafflestix (13), melbme (13), michaelgeorge (13), michaljackson (13), mid\_nine\_d (13), mikkel\_j (13), milstar (13), mirka (13), miszcz\_yoda (13), mk3211 (13), mkoeniger (13), mminaz (13), Mmsiddiq (13), mohjive (13), Momonug831 (13), morktral (13), morris123 (13), mp89yoo (13), mrbob8717 (13), Mrnibbles (13), msbottomlesspit (13), MuMu (13), murkymurmur (13), mvee (13), n3bulav0id (13), Navi10110 (13), Nealb2 (13), neroguy (13), newtale (13), nex\_test3 (13), nitsanshai (13), njhall (13), nocalgotstone (13), notorious\_me (13), nsalon (13), nuno (13), oaniken59 (13), OffPH.wnr (13), ogilvie (13), ohdaniel (13), Omercan (13), omidsakhi (13), ommygoodness (13), omorali (13), omul (13), Orblet (13), Osofa2000 (13), owngeking (13), p0sdriver (13), pariasa (13), parker1 (13), pascaleR (13), paulofodra (13), pavulon (13), pdculnan (13), pedropapini (13), PeroO (13), plevantine (13), plowhist (13), pocpoc0202 (13), polargom (13), powersimm (13), progil (13), qhdkstlf (13), qkrrldus0696 (13), qwertycrap (13), radium (13), rakseo (13), ravimi (13), rebecca\_lyn (13), Red7 (13), redpen (13), rical (13), rimos (13), rionepente (13), rkdqls1120 (13), rkksq42 (13), robjwilkie (13), Rocknpull (13), rufasu (13), rustychain (13), rwalfa (13), s2215218 (13), saberlight (13), saberravija (13), Saecularum (13), saffronmama (13), sallywing (13), samiyeh (13), sanchilli (13), sanrucho (13), santanabernardo (13), SantaTyler (13), sarah14 (13), sashabasha (13), saveterees (13), schneckelee (13), Selany (13), sergenth (13), sergioacamacho (13), Sevith (13), sfrizell (13), sillillie (13), silveremmie (13), Sissoula (13), skyfire (13), Slashthedragon (13), smartcorpse (13), smootha (13), Sooner (13), soosoo (13), sophiachaves (13), spacecadet-monkey (13), Spacefish (13), spyairlover (13), ssilc (13), stealth2456 (13), steinman17 (13), stjenquin (13), stocc (13), sujee416 (13), sunil.kim (13), suutiikeri (13), suzan52 (13), tau23 (13), tesselara (13), thank4li (13), ThEEUs (13), therecombinant53 (13), thervtr (13), thetroller234 (13), thom.bueng (13), tidot (13), til5555 (13), TimeBender25 (13), TimFortress (13), timothygreen (13), TinaS (13), tipy0512 (13), titlo3 (13), tj kraf (13), tmark432 (13), tngur1 (13), tots (13), treecat (13), trobinson41 (13), troche (13), tubbybanra (13), tustf (13), ultrayugen (13), usmcee (13), usuksr1 (13), val4711 (13), valkrist (13), Valoria (13), vangne (13), verimbao (13), vicer\_exxciser (13), Vincent2001 (13), Wacholder92 (13), waffle3z (13), waldheri (13), Warwickh (13), wdwr5452 (13), wembles (13), willywillywilly (13), wjmd94 (13), woongbaera (13), xodud7756 (13), yakjangsu (13), yangtsecuevas (13), yao (13), yash (13), Ylajali (13), ymmi (13), yooree86 (13), yourbestfrand (13), z423x5c6 (13), ZaekLeaf (13), Zagaus (13), Zebulonicus (13), zigurana (13), zippo24 (13), zoeynehc (13), zombiedonuts (13), Zpas24 (13), 1077416782 (12), 1234561 (12), 1bcb3 (12), 1n50mn14 (12), 222222 (12), 42 (12), 55jon55 (12), 98Wilco (12), aa9ek4 (12), aannyaa (12), ab3896 (12), abc164 (12), abcd1123 (12), absnoone (12), acetylcholine (12), adesacia (12), adLucem (12), admix (12), Ajodegi (12), akritivarshney (12), alakus (12), alecjohn (12), alexanderkmd (12), AlexNoble (12), alexyang (12), allisonjersey (12), almeidaccr (12), Aloa69 (12), alsrhkd2567 (12), Amberfish (12), Amesz (12), amma (12), andrekelley (12), andrey\_potopolsky (12), andy0579 (12), aneek (12), Annatar (12), Anthonysiena (12), antonlol (12), archystar (12), asdgasd (12), aseals (12), Asmath (12), astronomer (12), astronomas (12), atkinzel (12), avrille (12), awisnia (12), b9931005 (12), badam (12), baki8000 (12), balladguy (12), bananelol (12), bapeep (12), Baptiste (12), basse (12), bdosius (12), bello (12), berkesb (12), bfcotrim (12), Bigeski (12), bigspfan89 (12), Billy0621 (12), BillyBoy (12), blinglnav (12), Blobolobol (12), Bloergh (12), blugato0428 (12), bmlcg (12), boby820907 (12), bohyun (12), Bollo44 (12), bonachan (12), boomslang37 (12), Bram4Stoker (12), brandontod97 (12), Brethalmahar (12), brianmcw09 (12), brittybear0\_o (12), brro6678 (12), bryanfredrick (12), buffavaholic (12), bvwo11 (12), c.bennett (12), c.bonggon (12), calico87 (12), calv.ng (12), captaincaaveman (12), carleskapy (12), cashcameo (12), Catdonkey (12), cdizzle (12), CF (12), charismajj (12), Charlisaur (12), chatterj (12), Cherryam (12), chowendyw (12), chrvala (12), chuen2468 (12), ciaodejan (12), ckmccoy (12), Coen (12), coffeefly (12), Colin325 (12), colliermt (12), CollinsWOLF (12), come35 (12), Commando\_J (12), cosmostrap (12), courtneym (12), cpowa (12), cr139139 (12), Crackers (12), crazeman200 (12), creature929 (12), critias (12), cruthist (12), crystallina (12), cthompson (12), cyg (12), cyty (12), daddycool3819 (12), DanCoollins (12), Dankar1208 (12), darkbean (12), darkknight03 (12), DChek (12), ddyoung23 (12), deathspire (12), dementia (12), destinythecat (12), dgdg1212 (12), dhdlajrkw77 (12), dhzzang9673 (12), diddums (12), dimisitque (12), dja (12), DJIbeling (12), dkgusdl09 (12), dlkab1 (12), dltjsgml0507 (12), dmhzmxn (12), Doc\_Keith (12), Donna914 (12), dr\_rafael23 (12), Draxon (12), drchaparre (12), drdopeog (12), drmpop (12), Droid (12), duaf99

(12), dummy (12), eesakov (12), ehgns0417 (12), Eipotco (12), Elche (12), elijahnolan128 (12), elivan (12), elross425 (12), emeory (12), emilysc (12), enjoying28 (12), Enteos (12), escalofrato (12), esorf (12), Estybob1 (12), eufonius (12), eungu126 (12), evaline (12), eyese234 (12), fabeola (12), farrisbueller11 (12), ferretwithaspork (12), finaljason (12), fireengine (12), Flywinged (12), fm.machado (12), FranciH (12), Frappe (12), frenesy (12), frickinjason (12), fsmizlord (12), fspooner1 (12), galessio (12), Garm (12), gbroblox (12), gcarrat (12), geepawhill (12), gisele1221 (12), Glasseagle (12), globalslice (12), gms0606 (12), GODKami (12), gracie88 (12), GregO (12), haagendaaz (12), Hak-Tomoko (12), hamdiaahmed (12), hammerrule (12), hamwonhee (12), hana9 (12), hannahe (12), hefaists (12), hleisma (12), hmistral17 (12), Holly\_Coco (12), hristo\_colov (12), hrold0216 (12), hsh2654 (12), huitzlbane (12), hungry (12), hyj6012 (12), hysystem (12), i\_\_john\_\_i (12), I.am\_DD (12), i\_rose (12), i0582708 (12), ibby (12), iceman (12), iconoplast (12), ied1998 (12), IjonTichy (12), ilymel (12), ImaniDeal (12), Imthebeats (12), inanimateclown (12), ins1gn1a (12), interestingese (12), intermap (12), IschBing (12), Ithandil (12), jackfull (12), jacoberu (12), jahel (12), jak0723 (12), jamminjo (12), jargonbell (12), jashapiro (12), Javierca (12), jay925 (12), jbridge (12), jdczerwonka (12), jeonos (12), jewell65 (12), jgcho0747 (12), jherico (12), jhg87op (12), jhinson (12), jjjj (12), jjue (12), JKay (12), jkjkjij22 (12), jkl1 (12), JohannesArnold (12), jonny1618 (12), joshuamc (12), josua (12), jqaz123 (12), jschott (12), Judyhalter (12), jujukuy (12), juliejoa (12), Jungletrain (12), jureumi (12), jus8089 (12), JustinC (12), jw3wj (12), kahabkma (12), kaisa88 (12), kalfred421 (12), kamandi (12), Katharine (12), keigon (12), kellakk (12), kennethvGeel (12), kerowyn03 (12), kessell10 (12), kewms (12), khorin (12), khvorov25 (12), kikka505 (12), kirian (12), kirstydarling (12), kpaul91 (12), kpresbrey (12), kyle42walker (12), lancetankmen (12), LastEducation (12), laurazad (12), lavanya (12), lavlavinia (12), lavoieda (12), lazycurler (12), LDS (12), LeahGrodstein (12), lee1835 (12), lesoguzhan (12), Lesser\_Evil (12), littlehoff (12), ljg0521 (12), ljij (12), lkjheero (12), LLL3 (12), lmk8209 (12), look (12), lorena\_lynn (12), lostnuttybar (12), lottelotus (12), Lovelee (12), loz14 (12), LuckyLukeDesmo (12), Lud506 (12), luidam (12), luke.41132 (12), lukekaz (12), lukmaiai (12), LuluZhu (12), luther\_101 (12), luvcraft (12), lyy199 (12), m4cer (12), mack2028 (12), maddaneccles (12), maddiehammy (12), madspirit (12), maggie.heine (12), Magnolia (12), mailinator (12), mamas51 (12), man2392 (12), ManKetnas (12), marcel\_ha (12), marDin (12), mariaa29 (12), marilyn (12), markcorrales (12), marocus (12), martinrainaud (12), marut6bine (12), Matthi (12), MeanOyster (12), medicalpayload (12), medo77 (12), megamikezilla (12), megauma (12), MelissaHawking (12), MichaelFeyerabend (12), MichelleH (12), mijilianli (12), mike\_t (12), milla (12), mino159 (12), miriam (12), mistsong99 (12), mking2019 (12), mn (12), moe (12), monicaamelia (12), monodb (12), monotr (12), montanubes (12), mrogman (12), Mustard24 (12), my-dogms (12), mythguy (12), myun (12), Nana.Banana42 (12), nastida (12), nate2193 (12), nchina9 (12), ndevereux (12), ne\_fisa (12), neheti (12), nelisjew (12), NerdWorld01 (12), NeuroBlaise (12), neurobottle (12), neurodiva (12), neuronator (12), nice2killu2 (12), nicholai (12), Nidgel (12), nihilnovi (12), NineSun (12), nobyn (12), nospamdan (12), nueronaut (12), nyquiljunky (12), Outsides4me (12), pantelis (12), parasols (12), patricia\_3 (12), pcpl (12), pc-steak23 (12), petar.prepunic (12), petebio (12), pezito (12), pgaelan (12), phenomenal\_pat (12), philcart (12), philipc (12), piomar123 (12), pjhark93 (12), poksoroh (12), poldnev (12), pontian (12), potatobob999 (12), potential565 (12), Potter1 (12), prang (12), premier (12), psm020621 (12), ptw2638 (12), Pwata (12), pyj13 (12), q836503000 (12), qkrxofdk12 (12), quartz99 (12), ramon.azcueta (12), rapidstar666 (12), rcorran (12), Redfreak84 (12), redsnail (12), rellerbee (12), renegeneroso (12), rexhamilton (12), reyyyn (12), rgabrielson (12), rgupta234 (12), roar (12), robynkoz (12), rodrogjar (12), RoscaneanuBogdan (12), rpuga (12), rssbsagartan (12), rubbaman (12), rudwls1201 (12), Rute (12), ryanllw (12), rzezol (12), rzink15 (12), s7torn (12), saalfeld (12), saigo07 (12), saltheart75 (12), sam\_gallagher (12), samir (12), sand0kan333 (12), sanjiikun (12), sarah.emmons330 (12), sarahdaum (12), SashkaK (12), SBG98 (12), sbluen (12), scanEyer (12), schlefix (12), sciencegeek2015 (12), SCIENCELAD (12), scisarah (12), sean9541 (12), Secuential (12), seizurecube (12), semin97 (12), sevil0 (12), sgs1394 (12), Shadow5237 (12), ShadowFlicke (12), sharni (12), ShayBay (12), shbaboo (12), Sherie (12), shlon1004 (12), Shmease (12), shoggard (12), shrichard (12), sigmasix (12), singularitarian (12), sipuli (12), skybright (12), smeacham (12), smosmo (12), sofiaalfonso (12), softart331 (12), Soron (12), sp2013 (12), spa7652 (12), specialsymbols (12), Spinnetje (12), SRM (12), srowen (12), srubin (12), ssschultz (12), sshear87 (12), stankus (12), starslash (12), stieu (12), stone2x (12), streetcarver (12), striderjr111 (12), suicidaltomato (12), Sumisu (12), superzoid88 (12), sushiliker (12), sweetjesus (12), swilson (12), Sydneycav (12), Tachyon7 (12), taito (12), takao (12), TatianaKawkaw (12), tawny (12), tb27204 (12), tencio2001 (12), tesh95 (12), tginick93 (12), thatclimberguy (12), TheaWolf (12), TheCatQueen (12), TheDarkThought (12), thejezter (12), theo.lis (12), thomasphifer (12), threnus (12), thtrghst (12), tidirium (12), tjddns0003 (12), tnduscjfw (12), todrobbins (12), tomabud (12), tomgratte (12), tommmmmm (12), tony\_tong (12), tournever

(12), treejw (12), trekkie (12), trentski (12), TrippyTurtle (12), tristan.witte (12), trwelch (12), Tuexss (12), turbok-  
isiel (12), twistedsister (12), Twopair (12), tyler0911 (12), uellp (12), ulibu (12), VageGast (12), vanet (12), VarraX  
(12), venhammer (12), Vesque44 (12), vmon111 (12), volatilecat (12), VoxelSquid (12), VTK (12), waaga (12), wal-  
laor (12), way\_runner (12), werebear (12), wesmax27 (12), willstags (12), wirehead (12), Wisty (12), wonkothesane  
(12), woohoo (12), wstringer (12), Wurschtel (12), wwinder (12), xukvx (12), ygp228 (12), yk507 (12), yougi123  
(12), yoyoexpert (12), yw03 (12), zalhadilara (12), Zerodivider (12), Zshoney (12), zzzxxx (12), 1088517653 (11),  
16tobinm (11), 2mentor (11), 925lsy (11), 930818 (11), aar026 (11), aaron\_jacques (11), abekingdom (11), abren-  
nan (11), actcut5 (11), adam.coppin (11), Aelemental (11), AidarG (11), aisti (11), ajyumar2 (11), aknvtso (11),  
AlexPiazza (11), Alirian (11), allain (11), allenfr (11), Alodos (11), alpo (11), amazingpandabear (11), AMPA (11),  
AnaGarm (11), anam (11), andre2000 (11), angharad (11), angierudder15 (11), AngusCy (11), animagenic (11), an-  
mina (11), anneeherlich (11), AnnihilationFrog (11), AntaniaBaptista (11), Antenne (11), apple3i (11), aqbaq (11),  
arvorie (11), ASkyes (11), astolk (11), atralist (11), audtjr0104 (11), autumn4820 (11), aventurine (11), Averus (11),  
avinaut (11), awilson32 (11), ayoun27 (11), bababa (11), bachmann (11), bali3330 (11), baloso2011 (11), basarane  
(11), beckhalo (11), bentscha94 (11), bhawkins (11), biapepper (11), BigBadTCO (11), biosci (11), birder (11), birdis-  
tasty (11), bitbool (11), blackbiclight (11), blacktigr (11), boaskaken (11), bohimiadeer (11), bohni (11), boreum0302  
(11), borgind1234 (11), bostonffrb (11), bourquin1 (11), brainbird (11), brainhew (11), bscoter (11), bsw222 (11),  
BuffaloBell (11), bulpekorea (11), camilalino (11), canderp (11), caop4life (11), carolzinha (11), carrieinva (11), caru  
(11), cdegrafft (11), chargeorge (11), charlesstrauss (11), chocopie (11), chollyfield (11), chrisyoung (11), chsomp  
(11), cipsiak (11), clementsk10 (11), closetander (11), clsack (11), clsmith1 (11), cnaughton4 (11), cnhe (11), coin18  
(11), coldjalapeno (11), ConDanSlate (11), connorman (11), Conto (11), cr0atian (11), craigstra (11), crease124 (11),  
crystalrdh (11), CS798 (11), csdfreitas (11), cspalesk (11), csucusu (11), ctrhlik (11), customlogic (11), CyberNgamer  
(11), Daenryuu (11), dammalapati (11), dangerclosediabla (11), daniel\_117 (11), Darkin33 (11), darkshadow44 (11),  
Dataspre (11), david0721 (11), DavidPang (11), daximus (11), Daydreamer81 (11), denagorsheelan (11), denisbakker  
(11), DerGut (11), desctx (11), dgira (11), dhnam0502 (11), discant (11), djmamas (11), djtorello (11), dkliberman  
(11), dlieu626 (11), doctahjosie (11), dodotama (11), dolotai (11), Domenico (11), draganon (11), dragonskull (11),  
dreamer (11), dreamless (11), dreifuss (11), dthibault (11), dtsvikevich (11), duhpeachfuzz (11), dulina (11), duswhd29  
(11), dutje68 (11), DylanKeyer (11), efekaranis (11), egschweng (11), elektronik (11), elpaxton (11), elshadai081 (11),  
emacs89 (11), Emz08 (11), eomt9191 (11), epic\_rawrcat (11), epicguy12 (11), erik1249 (11), ernestoberlin (11), estecla  
(11), evergreen (11), Evodevo (11), ewizel (11), eyewirehq (11), eyre5309 (11), F.C.H.W (11), f.quatela (11), fatbob  
(11), Filadog (11), finlay (11), Firefight (11), fitchlet (11), fracter (11), Freaky713 (11), Frodo123 (11), frostbite795  
(11), fuguezap (11), fzink (11), gajagaja (11), GalaxyTrain (11), Garleyqp (11), gaxou (11), geo13 (11), geoslegend  
(11), gerst18 (11), GertTallies (11), gimmechocolat (11), gimoon0115 (11), gingila (11), gksdnd0317 (11), godbless  
(11), goeun20024 (11), goldelle25 (11), Grace96 (11), graceslickrick (11), greench (11), grega126 (11), gromme-  
tous (11), gudghks0217 (11), GuillermoBlasco (11), Guillote (11), guircosta (11), gurdiac (11), gvalles (11), gvorn  
(11), gwazdor (11), Hadeka (11), hamley (11), han90715 (11), hdicmsr (11), hellogoodbye (11), herostrat0s (11),  
hertha (11), hiphippo (11), hippopig (11), hiroseri (11), hjy1228 (11), HKjeldsberg (11), Hoizichri (11), Homan (11),  
huoyan (11), hyuny0505 (11), i\_am\_the\_max (11), ianislavus (11), icehand (11), ignaciogalegia (11), igorevers (11),  
Ilral (11), imberg (11), inkmandon (11), ironkiwi (11), Isidre (11), j12m12h12 (11), jack241099 (11), JacksonBurton  
(11), jacobyl49 (11), JadaLillian (11), Jaimeehowes (11), jakim01 (11), jang8708 (11), jason\_ahn (11), jasondhkim  
(11), Jaynewb (11), JBthesciguy (11), jdistiller (11), jereynlee (11), jflake (11), jhenriq71 (11), jhkw0106 (11), ji-  
hyuk81 (11), JilongYu (11), jjackk (11), jjun1212 (11), jjogakk (11), JKidd (11), jknotjk (11), JKTKops (11), jl813  
(11), jlurcott (11), Jofus (11), Johnawregfqwrgq (11), johnnykarate (11), JoMopel (11), Jonathas (11), jonheston (11),  
jordynwhitmer (11), JorgeAlonso (11), Joseph\_borque (11), JosephJ (11), joshkiner (11), joshsatt (11), josschne (11),  
joy6958 (11), jpratt (11), jsmunroe (11), jtchisholm (11), jtjones (11), JuanDelgado (11), juhyeon0525 (11), juni9040  
(11), juniob (11), juzadee (11), jwjwjman (11), jzcrz123 (11), kac049 (11), Kamika (11), kantilen (11), kataho (11),  
Keck (11), keepster33 (11), kerhbu (11), kernshen (11), kfiat666 (11), khw549591 (11), kmitt914 (11), kopik (11), kov-  
tun (11), krynos (11), kstrong112 (11), kunklekerijo (11), Kweir80 (11), L.fidalgo (11), l1o2v3e4 (11), lcampaign (11),  
lcataldo (11), Ichung2019 (11), ldcskap (11), leandrolleao (11), legojunkie911 (11), leticia (11), Liiga (11), LiKaBaWs  
(11), lilracer94 (11), limgh5798 (11), linchen (11), LipsiaUS (11), livyloozer (11), lize (11), lizunovv (11), locksmyth  
(11), lolliberal (11), loveggi (11), lsh5044 (11), lsj0303 (11), LukaszS (11), luminexence (11), lwb6 (11), lyaage (11),  
Lystre (11), m.korobkov (11), maartj3 (11), MahanIII (11), mam05096 (11), marcosvincius\_vs (11), marike (11),

marmot333 (11), martinablava84 (11), marvin.i (11), mary\_rose (11), MarychaMarycha (11), masonklva (11), matrix (11), mavata (11), MaxGolden18 (11), mckmuze (11), mell (11), mels (11), meltem (11), MgCO3 (11), mh7148 (11), midian (11), miggle (11), milkyway (11), minime123233 (11), mochagazzie (11), morganhk (11), mouse2643 (11), MrBlock (11), muneebr1 (11), mustafa.99 (11), muwave (11), Myers (11), MYNAMEISJEFF2.0 (11), nacosta (11), nasianik (11), nastyamel (11), natalie.myers (11), nchoudhury (11), Neuromancer83 (11), neurongirl330 (11), nghtwlkr (11), nhomad (11), nicculus (11), ninac (11), Nineboots (11), noala1111 (11), nobody (11), np64da (11), nufan4 (11), nuke0440 (11), numnummo (11), nuno75 (11), nutmeg1445 (11), OceanicDegree5 (11), Ono0012 (11), oopta (11), originalsteve (11), Orohena (11), oshoulson (11), osm1892 (11), Pachu (11), pangur (11), patrickmen11 (11), Pavel1987 (11), pax03 (11), Peachpassacaglia (11), PeachTrees (11), peas25 (11), peng (11), pguichar (11), pheeboo (11), philiosi (11), Philjack (11), pigwink (11), pisco (11), polastri (11), porfirion (11), PowerpuffGirlBubbles (11), pr0v3rbs (11), primadoepi (11), prismane (11), puczek (11), pyr0x90 (11), qhtjd03 (11), qkrdlfwn (11), quesadalejandro (11), RachelL (11), RadkaS (11), Ragnarokkr (11), Rav1357 (11), Rayray (11), RaySniderFollower (11), rckilgore (11), Rdalton27 (11), redfax (11), Redjohn (11), Release (11), Reverie (11), Rhapsoded (11), Richard-Cooper (11), rickdbrown (11), rickterp (11), Rishow (11), rkdekdms9947 (11), roach9 (11), Robmorse (11), ronikos (11), rossifr (11), rpviking (11), rshipton (11), rubikssolver12 (11), runner38 (11), ruskione (11), RyanB (11), SaitoInu (11), sasuke2490 (11), savone93 (11), scaldinghotsoup (11), Schmett (11), sdpenman (11), seabolt (11), selma\_ayat (11), Semyon (11), sh3421sh (11), Shadowhuntress (11), Shakku (11), shelbylhogan (11), shirtlessguy (11), Shmoop (11), shturman7000 (11), silentv (11), silviamo (11), sinadskiy (11), sirgomez (11), Skydoge (11), slayer123129 (11), slimaq007 (11), slschuh (11), smudgepuss (11), snowcurly (11), solli (11), solomitd (11), somarasa (11), something-fishy (11), songmj4050 (11), sooj1202 (11), spacekadet (11), speleolog (11), Spit (11), Splode (11), spoon1981 (11), ssanai94 (11), standgale (11), stickyfingers (11), stitcher247 (11), Storage (11), stormrussell (11), strawbarry (11), sukjinjk (11), suminiky (11), sunshine123 (11), SuperSiden4141 (11), swloke (11), swampy (11), Tallen01 (11), tamarack (11), teporter05 (11), The808Soldier (11), thecleric (11), TheDLirios (11), TheWeemp (11), thmolic (11), thronedobject (11), tiggez (11), Tiird (11), Tiomar (11), titoMclean (11), tl308 (11), tmjellco (11), Togo (11), Tolik (11), tomatogirl (11), tommyh (11), TonicRiver (11), tonyferranti (11), torabis (11), torilonghorn2 (11), torusgury (11), totty12 (11), trabbit (11), translwd (11), treerainsun (11), trvsmry (11), tuffbin (11), Twaddle (11), tylokojedenakt (11), tyllannon (11), vaiferth (11), valeriej21 (11), van (11), VanRzuf (11), Venividivelcro (11), vici (11), virginia oat (11), vlf2002 (11), volfied (11), vorichari (11), voviand (11), weesie (11), Weezerjt (11), whjang88 (11), willi0000000 (11), win (11), Wizard (11), WizardDK (11), wls4917 (11), wolfgirl18 (11), WTThomas5 (11), wusiwug (11), yourmaw (11), yozo\_ (11), yunmin0510 (11), zaccohen (11), Zantek (11), ziknik (11), zipmafia (11), zman1085 (11), zonno (11), zynpcvlk (11), \_yann\_ (10), \_curious (10), \_youownthefuture\_ (10), 0618jhk (10), 12rcollins (10), 256538 (10), 4444I (10), abrichards (10), abustillos (10), acerola (10), achsafatzmon (10), adam\_neuro (10), adellethompson (10), aeze (10), af\_comm\_guy (10), aglasnovich (10), aheontour (10), AhnJina (10), aintactus (10), airairaful (10), ajcressman (10), AKirk0530 (10), alanna.taubin15 (10), alegend (10), AlexandraCupo (10), alexandredias (10), alicee (10), alros0072 (10), amandadelacy (10), amapin74 (10), amborion (10), amebaj (10), amybcook (10), andrea.j (10), AndrewPecoraro (10), andy1503 (10), angelos (10), Aniruddha (10), ansqltwkd (10), anttipe (10), Anyaara (10), aortiz19 (10), aquatica (10), arewefive (10), arm (10), asdfasdfasdfasdfasdf (10), asdfgewr4 (10), asdfgjk1123 (10), ashattles2019 (10), aszecsei (10), atomikboom (10), AuntiePolly (10), Avaron (10), aymjilaiya (10), aznard (10), bagsb (10), bakin113 (10), Barb148 (10), baridebarid (10), bbernard8 (10), bbking10 (10), bdyzel (10), Beermuda (10), beomji (10), besssena (10), bhicks10 (10), biggia (10), bigsquirrel1997 (10), bkasukon (10), BlackAxon (10), BLACKLSD (10), blakmajik (10), blurry (10), brainyjay (10), Breemony (10), BrianB (10), brianmk (10), brokenbots (10), bruno18 (10), bubbafightsdeath (10), bujeebus (10), bumblebee (10), bunnywoot (10), Burnwolf1650 (10), CameronDodd (10), canenero (10), capibarbara (10), Captain\_Sea (10), captaintrunky (10), CaroleF2012 (10), caron (10), cc\_lee (10), Celerity (10), Cellott (10), cesiumfrog (10), charlotte57 (10), cheeko1234 (10), cherik (10), chicken-black0718 (10), ChinChin (10), Chisel (10), chlwlndn10250 (10), choih0310 (10), choimg6849 (10), christinafh (10), Chrizrockster (10), chulwon0110 (10), chunkymunky (10), cirrusthe (10), ckim36 (10), clashjoze (10), clevermonkey (10), cluboss (10), Coamihe (10), codechicken (10), codweasel (10), coffeyhaus (10), comwilson (10), conall (10), Conqueror\_Draconia (10), cosmosechoes (10), Cptnamurica (10), cransom12 (10), creolis (10), cromagnon (10), crytera (10), csh4128 (10), cttcjim (10), cykcyk0421 (10), czr (10), D1 (10), Dackel (10), dadde (10), daeduguy (10), dakstony (10), damsmad (10), dantiger (10), darkbloodwolf (10), darkPachira (10), david.pavlicek (10), davisj (10), dbates (10), dead2eer (10), dellenzinn (10), denyallforks (10), devanarhea (10), dgillespie (10), dharmah (10), dhiraj



(10), dhlaktkfd (10), dianasoriano (10), diggar1807 (10), digitalhavoc (10), DivaDonna (10), dkallenqueens (10), dkutsovsky (10), donarmel (10), Dragonlilly2 (10), DragonRU (10), DrBetsyOtt (10), drostova (10), DrPepper1235 (10), ds (10), dudgns2486 (10), dunsky864 (10), durbag (10), E.A (10), ebullientelisa (10), eenae (10), Efobla (10), EGriffithsii (10), ehlwlzh123 (10), ehnovak14 (10), eirisj (10), Eloh (10), ely26 (10), enen (10), EngineerGirl (10), epilady (10), ericsims (10), ericthered513 (10), ErinSmith (10), esotericman (10), eye1337 (10), fancypantsdancer (10), fawnlemur (10), fedosov (10), fleischwolf (10), flinz (10), flokraft (10), Fneuw (10), foivosp (10), formicidae (10), fraaanz (10), francisno (10), freshy (10), froupi (10), frozensherpa (10), frrrbzzzt (10), frwic (10), fudgecakess (10), futurism (10), fzurit (10), g\_ribas (10), gaartyn (10), gaffi (10), ganstalicious (10), gargoyl1987 (10), gasavory (10), gaston38kpo (10), gcxgv (10), geolev (10), ghismo (10), ginryo (10), gkrulce (10), gmarino2048 (10), Goddard (10), godlyzombie (10), godmoon00 (10), Gorz (10), gottabaradda (10), goulding40 (10), grapebug (10), grapiekates (10), gs1303 (10), gudaks13 (10), gukoxx (10), gulfchick (10), gwynhyfar (10), hagensos (10), hal-lung86 (10), hamteeabx (10), hannahnicole (10), Harablanas32 (10), hardymariana (10), hatsamo (10), hectorh (10), heeh414 (10), HeinzLindermann (10), HeyDiver (10), hhix (10), hibounoir (10), hildeaux (10), Hogeun (10), hoju4949 (10), HoriaPantelimon (10), hotpepper (10), howard852963 (10), hplar (10), HuAir (10), hurthn (10), Hus-sainA (10), hwiseman20 (10), hypatia (10), Hypolius (10), hzeigs (10), I-see\_you (10), iammiini (10), IanV (10), icefreezeme (10), igooglet (10), illuminande (10), imcneil86 (10), Inge (10), inseo (10), Internet (10), intrigued (10), ionsurge (10), isabelverghese (10), izzi (10), Jack\_Norrison (10), jacol17 (10), Jacu (10), jaexi (10), jai2all (10), Jamoni (10), JaneJ (10), janepederson (10), janiebug (10), jappenzeller (10), jatrasti (10), jayjay122 (10), jblasic (10), Jcjoy (10), jck78781 (10), jcsandlin (10), jdpl17 (10), jds392 (10), jennya (10), jess (10), jess7356 (10), jessstobbs (10), jez.gillen (10), jfutbol10 (10), jharris (10), jhlchu (10), jimryan2000 (10), jinho0322 (10), Jkwarlick (10), jmjohnston (10), jnphilipp (10), jofor (10), johndol (10), johnnyroop303 (10), jonathanmurray (10), joori92 (10), josimarasilveira (10), juanse (10), juliazh (10), Juma (10), juricap (10), Justinemarc (10), jvreyles (10), jwiseman (10), jwu (10), Kade (10), kangmin2580 (10), karolia01 (10), karsibali (10), kasiaa (10), katemetcalf (10), kayzie097 (10), kazanshin (10), keepinggiant (10), kekkuz95 (10), keklasky (10), keneyewire (10), Keraman (10), kesta195 (10), kevin9827 (10), kevinlee91 (10), kevinwpalmer (10), kewko (10), keylan (10), keywestcomputerguy (10), Kilo-mbiano (10), KimieForehand (10), kisuk\_k\_lee (10), KJ\_ (10), kjan95129 (10), kjmrainbow (10), Kmknigh (10), knifebeard (10), knorke (10), korSDJ (10), korzonkow (10), Kotokrad (10), koyo83 (10), krcookie (10), Krizzly86 (10), kunilkim (10), kweku9 (10), Lamatama1 (10), lbiel17 (10), ldcsdie (10), LeapOfFaith (10), legomaster536 (10), Lemming (10), lightsaber (10), likeaboss (10), limerickman (10), lisawoody (10), lisir (10), lisna0413 (10), little-new (10), LiviaToric (10), LoliNessie (10), lombaej (10), LouMaster (10), Lpxoh2 (10), lsh990414 (10), LStevens (10), lucasautrey2001 (10), lucassko (10), lunatic (10), m4573r (10), m4nu92 (10), mackman (10), Madnesreigns (10), Magalita (10), Maksim (10), mania21id (10), manshoon (10), mappingthebrain (10), maracujax22x (10), marchack (10), marcin19962 (10), Marcus\_AB (10), marekmajcher (10), Marika84 (10), MarinaStone (10), Mariner102 (10), mark4272 (10), marlok (10), marlow (10), marlynep19 (10), marpra10 (10), mashiggins2014 (10), MatejSulaj (10), MatikTheSeventh (10), mattczab (10), Matth1012 (10), matthewcurley (10), Mazzodude (10), mbbeckman (10), mchynes (10), mcpbv777 (10), mcsack12 (10), mdbreneiser (10), meganlo (10), mekmek0613 (10), mentisludos (10), meoso (10), mfloresh (10), mfredrik (10), mgokey (10), mhirsch (10), michaelaritz (10), michellejane (10), mich-petea (10), Mike\_Staudinger (10), mike117 (10), mikegalla (10), miklem123 (10), mircea (10), Mirtham (10), miskaw (10), MissErica (10), mistressval (10), mistwire (10), mitsopoulos (10), mlehrke (10), mm8708922 (10), mmoral2000 (10), mocha2007 (10), Mokbor (10), moretome (10), MorningMist05 (10), Mpantu (10), mr\_fishy (10), mr\_ike (10), mr.molamola (10), MrAndix3 (10), MrProGG (10), musefandianamc (10), mwaguilar (10), myeye (10), n0c0ff3in (10), namiot (10), nana\_107 (10), nandi (10), Napaalm (10), nashev (10), natalia123 (10), NataliaAlvarez17 (10), nathaline (10), natureluvver (10), Naybas (10), nazuzya (10), ncXter (10), negrilla (10), NekoYasaka (10), neuron93 (10), neurothluke (10), nightdaw (10), Nikola\_Tesla (10), niladri (10), nivchek (10), nnull (10), NNJARice (10), Noah-Bluetail (10), nobody\_ (10), nofi (10), norbeej (10), Nostalgia\_Kid (10), Nylive (10), o65morales (10), okkong62 (10), oldhaunts59 (10), omeisner12 (10), Omenbathing (10), oms2112 (10), onedog120 (10), oradneon (10), orestd1 (10), OrgGanglia (10), ornina (10), oxigen (10), Padawan42 (10), paris (10), Parrd (10), patentani (10), patoine (10), pavel (10), pbraginsky (10), peepoooo (10), perju (10), persanatomy (10), petersvalerie (10), Petushkov (10), philor (10), Physykus (10), Pieczko (10), pinar.demetci (10), pinkandgold (10), PinkPanda (10), PiVi (10), PixaAssassin (10), pmiele (10), po09023 (10), Poenike (10), polari22 (10), pooman (10), PotatoPeeler (10), preori04 (10), presb (10), Primefire (10), primpuff (10), ProfessorA (10), Prostetnik (10), psiphi75 (10), Psycho (10), pucamor (10), pulpl (10),

Puopjik (10), pureruby (10), purplepro8 (10), qogothf82 (10), qoxmffoafma2 (10), queronimo (10), quin (10), ramonariscau (10), Rasker (10), rca50 (10), redbluebirds (10), Reinhard10 (10), rexrodeo (10), richelle (10), rikio (10), rinnix (10), riskingraisin (10), rjrosati (10), rkawkclq03 (10), rkri1 (10), roadkillbill (10), robertvargas (10), robinrose80 (10), rocelilima (10), rodin1818 (10), rosey (10), rossi\_michelle13 (10), rshopiro (10), rsrafael84 (10), Rusty91 (10), rustyburger (10), ruthmurphy (10), Sabik1234 (10), sachin22222 (10), sahilsatam (10), SaintJesus (10), sam1234 (10), Sarahessahkleva (10), satgat (10), savageinc (10), scott98bm (10), scottz (10), scphilip (10), se\_iphigenia (10), seeingstructure (10), sephblaze (10), sepi (10), SerGiovanni (10), sey0286 (10), shannonemorgan (10), ShelbyStinkers (10), shell (10), shjoo0110 (10), Shooter65 (10), SHunt02 (10), shuurei (10), shyyk (10), Sibula (10), siddhartharay007 (10), sidsid (10), Simon1337 (10), simonsays095 (10), Sk8er\_Of\_Bodom (10), skaya (10), sledgenl (10), msgazette (10), solanum (10), sophita (10), spaceoditty (10), sprite62 (10), ssgheW (10), stareatlyra (10), starkneuron (10), stebbsy18 (10), stella (10), sthor (10), strider935 (10), stuc3386 (10), styx (10), sumo545 (10), sumpfkrautjunkie (10), sunseo97 (10), superkubelt (10), Svedriall (10), svenmollema (10), sworgath (10), symstym (10), syyunho (10), tacowallace (10), Talch (10), tashco (10), tcyrkot (10), tdrag (10), techJargon (10), Tee7 (10), tehmezz (10), terrilynn (10), terryhsh (10), tgilhou (10), Thedoctor1979 (10), thehumanmeat (10), theme (10), themeadesian (10), thevasilius (10), Tico (10), tigerbom8000 (10), tim2000 (10), Tinamaps (10), Tjackhammer (10), tkdnj88 (10), tmanteiga (10), tmdldh (10), tmf177 (10), tngal59 (10), tomosoeoc (10), tone121 (10), toonation (10), toreit (10), Torros (10), tquitugua (10), trebolesverdes (10), trepia (10), trombonetom (10), trrtr (10), TSparkle (10), tsuchinoko (10), tux2000 (10), tveitan (10), Twentyfists (10), twisteye (10), uberokeer (10), UgLiMe (10), uhntzlqe14 (10), ultralight (10), union12 (10), Untanas (10), Usamero1 (10), utelliog (10), V414s (10), valow (10), van\_xan (10), viciouschicken (10), victez (10), VigiHunter (10), VincentCKingsley (10), Violise (10), Vittorio (10), vkon (10), vmfpel0425 (10), vnegi (10), Vogel612 (10), voidzombie (10), vsauce4 (10), ward2jm (10), waterbug123 (10), webskull (10), wgillstudentngfsorg (10), whdgn1123 (10), wheels22kt (10), WhiteOnRice (10), whying01 (10), williamsmj2 (10), winterkid11 (10), Wisback (10), wjddh1230 (10), wjddnjswo102 (10), wolfgray (10), wren (10), Wurstbrot (10), wwwchus (10), xaoness (10), xiang (10), Xmask (10), xring1987 (10), YeoGyuRi (10), yjchang (10), youngerjo (10), ysh.titanic (10), ysy98081 (10), yugioh75913 (10), yungyun (10), yydd5112 (10), zaholm (10), Zaicat (10), zaubara (10), Ze\_Blob (10), zeynepbakirci (10), zii\_new (10), zola20 (10), zuzak (10), ZWXXXX (10), zzang00k (10), 06david90 (9), 1051272665 (9), 1099495541 (9), 11GraceM (9), 11yj11 (9), 18ethbe (9), 4dninja (9), 51naa (9), 5640802 (9), 716400 (9), aaggaa (9), abbyyyy (9), aceklm (9), achall (9), adavis4 (9), adh4847 (9), adnicker (9), adriennegp (9), adult11 (9), aholme (9), AliMunn (9), Alisano (9), aloeber (9), alsquddlrnt (9), AlvaroGf (9), aman1995t (9), amconner123 (9), ampage (9), ances (9), andrea.coltro (9), Andym96 (9), angrywolf (9), antable93 (9), aogarlid (9), apowell2015 (9), archo (9), arcturo (9), arkin (9), arrfou (9), arthurdbonnet (9), arwenizaldi (9), asdfgasdf (9), ashleyjames (9), assariolee (9), Assel (9), astronautlevel (9), aturc (9), ave (9), avmar (9), axolotl (9), aybikeonur (9), AzeExMachina (9), band1t (9), banjolado (9), barbarafrake (9), barirv (9), bcallaway2019 (9), Bdssmcgovern (9), beefycheesy (9), beehole (9), Best-CaseSurvival (9), BG9 (9), Bialko (9), bigm (9), biink (9), bilsvdub (9), bing1992 (9), bjadadu040317 (9), blueice2k3 (9), bmeader12 (9), bobbyyfc (9), BobTheJoe (9), bohdan (9), booksandcinema13 (9), BowserBrowser (9), bradscarlett (9), brbolduc (9), brettcllins (9), bridgetjeannette (9), brielle.findley (9), briggs (9), brilock (9), broden1616 (9), brunered (9), btsmania (9), BubbleGumMachine (9), bugrakurban (9), bushytail3 (9), butenkan (9), Byay420 (9), cabc (9), cadman68 (9), callistalaine (9), cambarr (9), carlos (9), cdstanding (9), cehosch (9), chaeseel (9), chah-abljaha (9), chappell (9), charred (9), Cheblan (9), Chila (9), Chiwooin (9), Chlochette (9), choi3927 (9), choijiu (9), ChrisEyewire (9), chrisc (9), christianpaulx (9), christinarodo (9), chuck86 (9), chuckod (9), ciarmageddon (9), cicha (9), cjarro (9), ckdgns56 (9), claiRET (9), claudia.karakashian (9), clkhlz (9), cnardoZZi (9), coaltube (9), coc-cinea (9), coda.buchanan (9), codingstyle (9), coleby555 (9), ConnorDeeBee (9), CookieMonst3r (9), cool28574 (9), cottykerr (9), CrazyDaisy (9), CS42 (9), CW83302 (9), daggerfall (9), DalekLuna (9), Dama\_Z\_Lysiczka (9), danc-ingtilldawn7 (9), danetenhave (9), danna (9), darkges27 (9), Darkhawk5 (9), darylhyun (9), dashxdr (9), datamarine (9), daveadm (9), daveybones (9), davidisrael (9), dbeckcreative (9), dchris (9), delid (9), delta28770 (9), deltapapa (9), demoniacapricot (9), Derp\_Derps (9), despruk (9), devchoi (9), dhkim0915 (9), dingolicious (9), DitaD (9), divinix (9), dijordis (9), DJohnson9337 (9), dkgkazzz (9), docl (9), dodojine (9), doffle (9), Dohyun\_04 (9), dojjeyatgmail (9), DomOliver (9), Donald\_the\_duck (9), dregirl (9), Driezer (9), drockcannon (9), duaekgml (9), DusanHavlik (9), dvarney (9), dwelfje (9), EAAL (9), EdisonMaxwell (9), ehayward (9), eklectic23 (9), ekwind (9), elby1971 (9), elenad (9), ElkeRenate (9), eloc505 (9), elondain (9), elpino9408 (9), EmanueleVico (9), Emily75 (9), emmalarr (9), emmalea (9), emsy (9), enanina (9), enlightenerg (9), epresbergl (9), EricaKrause (9), ericdarian (9), erintra

(9), ernie\_king (9), erodrigo (9), etl4t (9), Ett (9), etymological (9), eyewirecho (9), Fa771n9 (9), fanaticc27 (9), Farer (9), fastag (9), fath1339 (9), fehr3916 (9), feno251 (9), fghj359 (9), finnic (9), fireinthesky (9), fjricci88 (9), flamewh1sker (9), flovelez (9), FluffyPlatypus (9), fouquet (9), fournames (9), Foxhunter (9), francis (9), froillard (9), frost (9), fufuhuk (9), fuui12 (9), furg911 (9), furyz (9), Gagers66 (9), gentlemanloser (9), gfsecretagent (9), Gianinoto (9), Gifmred (9), giggles199 (9), Gigi01201 (9), GingerLily (9), gintoki25 (9), gladlysschechter (9), globalbrain (9), gloverp14 (9), godsgood2me84 (9), gollyticker (9), gomezcoolpl (9), greenberet (9), grim3271 (9), grogar7 (9), gsteinltu (9), guymatteo (9), hadanny (9), hakha10 (9), halcyonnnn (9), hamlet (9), hammoncheese (9), hana.susak (9), Hannah\_Yeldell (9), Hansruedi\_Mathys (9), Harbean (9), haylov77 (9), hellphyre (9), HIDH (9), high0301 (9), hijustme (9), hjahn99 (9), Hoarii (9), HolmAlone (9), honestkoko (9), hrlee2004a (9), hunter1221 (9), iabz (9), ickra (9), igotskills101 (9), iharas97 (9), imnikkib (9), infinityplu1 (9), ingoge (9), Innovation (9), inphan (9), isabel76 (9), IsoAnna (9), jack734 (9), jackoop (9), jadaanderson (9), jaeju2134 (9), Jamerack (9), jamesham (9), jamesonbartlett (9), Janet\_Lin (9), jangaj (9), jaramai87 (9), jarek.pavlis (9), jasperm (9), Javiersebastian (9), Jayce89 (9), jaysonmax (9), jaz\_knos (9), jbear (9), JeanetteLB (9), jemura (9), jengw00 (9), jeremyxx96 (9), jerrremmy (9), jerrydej (9), jfearney (9), jhm3 (9), jhpaeng306 (9), jhskinner (9), jimbo51 (9), jimmyjs (9), jipkin (9), Jiragun (9), jjproducts (9), jjvrensborg (9), jkang (9), jlplac (9), Jmaag76 (9), jmhyun (9), joealkhayyal (9), johnchaquinga (9), jongend98 (9), joo80 (9), jpm621 (9), jrojas (9), jsim (9), jsrozner (9), JuanSD (9), juju9512 (9), Julianjones399 (9), julupy (9), jurrejelle (9), justinjakovac (9), justinmcd4693 (9), Jutmanb (9), Jwb (9), jwchlrkdgus (9), k1456 (9), kaerfnomekop (9), Kallii (9), kangjin1022 (9), kappapi (9), karafox (9), karlfunk (9), KasiaG (9), kateb (9), katewk (9), kb666 (9), kbeats (9), kelrag (9), kered (9), kestevens (9), kevers94 (9), kevvv (9), KeyBored (9), keyeri (9), kh (9), kikiki403 (9), kingchang92 (9), kingfisher220 (9), klippfisch (9), kmisu (9), kolangs (9), KoMtuR (9), Konafets (9), konfusius (9), konji (9), konradpersson (9), Krakent (9), CrazyTraynz (9), kristasoltis (9), Kritzinger (9), kruton (9), Krypted (9), kst179 (9), Kuba38 (9), kuchera6 (9), kuhnroyal (9), kungaloosh (9), kwatson424 (9), l0oky (9), LadyInRedwoods (9), LAlex2014 (9), langecrew (9), lava487 (9), lawahine (9), ldcslon (9), leegibin (9), lemonade (9), Leopardmask (9), leopardtiger (9), leoward (9), levin.seidt (9), Levy (9), li14math (9), liannamc (9), lianne (9), lihwei (9), link3697 (9), Litomer (9), littleschwartz722 (9), lolzer (9), lovelybookdiva (9), LRA (9), lsh0213 (9), lspiegel (9), lstettler2019 (9), lsxd3753 (9), lucaskato (9), lucasoares (9), luisfilipemayer (9), Lunisen (9), lwslee (9), LZ (9), m24parker (9), MacGT (9), madamic (9), madmod (9), manananna (9), marandyo (9), Mariafdezromero (9), maribeL\_poppins (9), Marino (9), markreiff (9), marwenn123 (9), marybr (9), marykay (9), Mata1979 (9), mateusz (9), matematikakias (9), matt\_perez (9), Maxgreen (9), mayson8 (9), McChanster (9), mclaughk16 (9), mcregt (9), mcusato (9), mdkeller (9), meechl (9), melonLord (9), menacia (9), mf28okee (9), mic20666 (9), MichaelKaczmarek (9), MIg (9), mihaimare (9), mike1115999 (9), Mikeboike21 (9), MikeKraEye (9), mikeyjd25 (9), mindcon (9), MINILUIGI (9), misst63 (9), mistermiyagi (9), MisterPanda (9), mkireeva (9), mladow (9), mnm22 (9), molliel08 (9), monster860 (9), montpellierjuzu (9), moragpeers (9), morbo (9), morlokh (9), mpaolil1 (9), mrjaffacake (9), mroctopus3 (9), msaunde1 (9), msfeline36 (9), MShinner (9), mtkonta (9), Mus0t0afa (9), musicezra (9), mylgers (9), nacl (9), nate2 (9), NavyMarineCoreYT (9), NereusHoi (9), nex\_test1 (9), next\_time (9), nguyene (9), nicetle.K (9), nicholas237 (9), Nickalus (9), nickpagliasotti (9), Nicoleharrison (9), nikropht (9), nintenpug (9), nkem\_test (9), Noeyh (9), nomis (9), Noodle\_Lord (9), nougatin (9), nstrada (9), nueron\_k (9), nunakuna (9), oanap24 (9), OaneaMadalina (9), oberthurell (9), odl23 (9), odland (9), ohspc89 (9), oinyoung (9), ojr1126 (9), okok12316 (9), OlafOhLove (9), omerjoe (9), omidmostafaei (9), onasixday (9), onedcl (9), opphk1991 (9), orbiliusIII (9), OrionWolf (9), paintednipe (9), Parad0x13 (9), Parang (9), parkmin619 (9), patufet99 (9), Paul\_Hinker (9), paulaperestrelo (9), pcy1025 (9), peadar1987 (9), pearn91 (9), pendley (9), peng\_jliu13 (9), PerunPerun (9), peter (9), petermccormick (9), pheartheceal (9), philcalhoun (9), phine (9), pionia (9), piratekayte (9), piscine (9), pjw (9), poakolsababa (9), ppp0lly (9), Prett (9), Privatosan (9), prm1016 (9), psy1198 (9), puffin.anna (9), pvol (9), qhua (9), qwerty000902 (9), r\_campos (9), radioactive (9), ralex484 (9), ramiretee (9), Raphael (9), raphaelhamad (9), raptorbenn (9), razor2988 (9), rbrudzynski (9), rcopys (9), rdaniel32 (9), RedSatine (9), reialisanne (9), relaxgo (9), Ren\_At (9), rensphu (9), resilere (9), rex045 (9), rgw616 (9), richard\_lowan (9), richfiles (9), RioLobo (9), rlatldn01 (9), roborob2000 (9), rodlangley (9), Ronaldinho (9), rooby30 (9), ruj54zzert76345 (9), runnerman943 (9), ryannephillipson (9), saik (9), salderwe (9), sallyp (9), Salocin42 (9), samantasedko (9), Sancho (9), sancta15 (9), sandrca (9), sangyu (9), sankatze1 (9), sara5 (9), sarah11235 (9), sarah156 (9), sasha\_nc (9), sbergh (9), scaley5 (9), scienceharp (9), sciutoalex (9), sd3335 (9), secretchief (9), sengjr (9), sesw (9), Set1985 (9), sgeorgeaz (9), sgl002 (9), sherlyn (9), shigu (9), shiney31 (9), shirashika (9), shoerthing (9), shonali92 (9), short1st (9), SilverBullet239 (9), simileo (9), Simmu427 (9), SIMZZING (9), Sinka13 (9), sittles1 (9), SIW (9), Sky\_stars

(9), sledgefist (9), sleepingco89 (9), slwilho (9), smarcantonio (9), smuuk (9), snowhale (9), something\_exotic (9), sorani53 (9), sparkluminosity2 (9), spencerouellette (9), SPHEREz (9), Spheroid (9), ss9choi (9), ssaouma (9), stahcy (9), stakhanov (9), stefann (9), Stefanwojcik (9), stetothcope (9), steve159 (9), stillbreathing98 (9), stnorma (9), strax (9), Streeka (9), sTTO (9), stygianinq (9), Sugarcain\_95 (9), sunil (9), sup1210 (9), suruga08 (9), susanl (9), SuzanneThomas (9), sw.goddess (9), Swagmonkey (9), sweetlyb (9), tafheemuddin (9), taniamadrigal (9), Tedster500 (9), thalandius (9), Thassarian (9), THChan (9), theface4181 (9), thefatherx (9), thelinuxuser (9), theescozz (9), TheSpawn (9), TheUltimateBiohazard (9), thezbyg (9), ThirdScenario (9), Tics (9), tiffanyyyylim (9), Tina841021 (9), tmiller2 (9), tmnsquirtle (9), tmtgame (9), toddsmuth (9), TomasVilcek (9), tompetres (9), tomstack (9), TomWire (9), tomyoung4 (9), Tony\_Thenu (9), top5pin (9), tothemoon (9), totoradio (9), TravF213 (9), Tribun (9), trickster245 (9), Trissy (9), tronmegatron1 (9), Trosscal (9), tsugglez (9), tvtas (9), tw1psy (9), TWHankWu (9), tyber (9), ukimoya (9), ultimatewill (9), umar (9), uraeus\_nefer (9), vandmike7 (9), vdelcros (9), veemarie (9), verenarie (9), vininolli (9), violetense (9), Viskovitz (9), VladimiraVavrincikov (9), vycron (9), walnuts88 (9), warcon68 (9), water\_wetter (9), weatherman14282 (9), weezyweasel (9), WelvinDaGreat (9), Weronikaa (9), wjdehdgh20 (9), wjuyh9 (9), wkdgkfla (9), wkskxk12 (9), wldnsaks (9), wlsdn0514 (9), wonsy92 (9), woo.h (9), wose (9), wudoo (9), Xartios (9), xatzhs (9), xdsff (9), xelzi (9), xiram (9), xKittyX (9), xolodutra (9), xXShadow (9), y (9), yew96 (9), yonghwan4118 (9), yoruba (9), zawadand (9), zbjjjang (9), zemandy (9), Zesali (9), zine9 (9), zoharn (9), zorbathut (9), Zygro (9), zz0422zz (9), \_number14\_ (8), 1055827404 (8), 1077995609 (8), 19raptor (8), 2kfury (8), 3lec (8), 4804112292 (8), a.sterehov (8), aasschl (8), abdrhman (8), abmedd (8), abraxein (8), abyssalcosmos (8), ac4we (8), achunium (8), Aclone (8), Adaptation (8), aelkins2 (8), Ahayri (8), ahbcr (8), ahhbrendan (8), airfix (8), ajello (8), ajerick (8), ak36 (8), AKS724 (8), alan\_martins (8), alazergun (8), AlbertoVF (8), alex791 (8), alexandresc (8), alexkorchevski (8), alinamador (8), alswjd4802 (8), Alyona (8), alyssaloveee (8), amanamme (8), Amariel (8), anchor\_yourself\_ (8), anenka (8), AnMarieJ (8), anmrlp (8), ant111 (8), Antharas (8), antoineb (8), aoterra (8), apccool (8), aratec (8), aray1429 (8), arekg (8), ArishuAri (8), arkan (8), ArmusJim (8), arozo (8), arsenic (8), asdf1 (8), ashemmi (8), ashvio (8), asmoak (8), aspiro (8), asterixchaos (8), atoms (8), Avanine (8), avater1234 (8), avaughn271 (8), avh4 (8), awb5741 (8), ayena (8), az87 (8), b.buedi (8), b4sti4n (8), bababaubles123 (8), baewoo55 (8), baller (8), baneshea (8), Baptised (8), bat717 (8), Batxter (8), bcates (8), bdauidj (8), beckylein1551 (8), benevans84 (8), betom (8), billyamfire (8), BillyMCC (8), Biohack81 (8), bioruffo (8), bird00703 (8), birdfry (8), birogeri (8), biscuit\_power (8), Bishop1056 (8), blitzke123 (8), bluemchen (8), BlueOrbit (8), bmamikoglu (8), brain258 (8), braindead2u (8), brainhoon (8), brankooo (8), breinj2 (8), bridgetpainter (8), brix (8), brunob (8), brunsviken (8), btipton2 (8), bvillarin (8), bwinter999 (8), bzw0006 (8), cam3517 (8), caol (8), capable (8), carloss (8), Caroline\_S (8), carpenter (8), cassiopeiabb (8), CathyRourke (8), cats1ck (8), Cdanhly (8), ceilingofstars (8), celedhros (8), cesare96 (8), cesole (8), cetra (8), chaoswolf (8), charlene\_moser (8), charlesqeeg (8), CheezeMonkee (8), chengcheng (8), ChiefSosa (8), chl39 (8), chm6194 (8), ChoiKyuHyun (8), Chris1127 (8), chrisbacon18 (8), ChrisHo (8), christmanx (8), chrizbot (8), ChronosMOT (8), chrystynelynn (8), ciardon01 (8), cimitchell (8), citizen7 (8), cjtaylor4 (8), clwoodin (8), Coati (8), cochise (8), compassionatePillow (8), Compound (8), ConradThompson (8), contzero (8), copileo (8), craigpricne (8), Cristina.Prodan (8), crocadilered23 (8), crosmaker (8), crunchycard (8), Cukee8 (8), cwmiserv (8), cyc027 (8), daestrik (8), dahljaci (8), dan0 (8), davidcoletta (8), davidwhadden (8), dbli2000 (8), dbwldk (8), dchew202 (8), ddimino (8), deayounglim (8), deebug63 (8), deede (8), demonlord721 (8), denisecwoods (8), DesislavaIvanova30 (8), devlindaley (8), dfgd3 (8), dibourget (8), diffcool (8), dladmstjs1 (8), dlckdwns1663 (8), dldnxor (8), dlgarcia75 (8), dlsdnd3054 (8), DNA.K (8), Dnidubh (8), dnssec (8), doc\_schuh (8), doctorbensu (8), doctorschler (8), dodamima (8), dodeh98 (8), donls (8), dot1950 (8), dragontsd (8), drakdude87 (8), DrakeShepard (8), drasticdreamer (8), dubberle (8), dubjay (8), Ducky630 (8), duilio05 (8), earwire (8), easycheese (8), Eduardinn (8), edzija (8), eeklund (8), egiby (8), EgorAnanin (8), ejl717 (8), elect3573 (8), electronjoe (8), EliasF (8), elimanary (8), ellis (8), elsherbeni (8), emmajames (8), emmance (8), emmathesalamander (8), Emmea (8), empiriator (8), erikkeith (8), Ester (8), eugeniereidy (8), evans69 (8), ewigekrieg (8), ey9922 (8), eyebijayananda (8), f2rb (8), farblab (8), Faulhaber (8), fbfla12 (8), Federica\_ (8), Feldmarsalek (8), Felice (8), feliciajo (8), FH (8), fireful (8), fkdlemthem (8), flour83 (8), FlyNeko (8), foglio (8), foee (8), Forecast (8), forqag (8), foxdimi (8), freesong1 (8), Frivil (8), Fullofpickles (8), fungi (8), FunkyCat (8), furmada (8), fusiform (8), fusons (8), gabbyweinberg (8), GabrielVanzella (8), gamesaucer (8), gamezbase (8), gandharva (8), GatoMysterious (8), gaubee (8), gbessellieu (8), gbs04087 (8), geemannz (8), gemmi (8), geno93n0 (8), geoffreygreen (8), gewalker (8), ggcity (8), ghost6six6 (8), gingervitis (8), gkw1590 (8), glyphtheory (8), Glywan (8), GOA\_KWa (8), godzillasuit (8), goodwinj14 (8), Grasshop13 (8), greatgoliath007 (8), grenaug1234 (8), grizlytitan (8), GrosDuc (8), gummo

(8), gustavadolf (8), GuyLeftOfFreddie (8), habib\_14 (8), haedami99 (8), haggiswench (8), hahiato (8), hairidoo (8), han010707 (8), hanbaggu (8), hanbin (8), hanjo (8), hans0522 (8), harges (8), harleyee (8), harryables (8), haugs2 (8), helena0417 (8), herry (8), hiram (8), hiwang123 (8), hjhch1234 (8), hjn0729 (8), Hooper4 (8), hortonle (8), hose\_915 (8), household600 (8), Hrizaurg (8), hsryu1998 (8), htbear72 (8), huginn (8), hyun326326326 (8), ianc (8), iaque (8), iCrazyFrog (8), illollogico (8), imahappypanda (8), ineffible (8), irongame (8), is9457 (8), isah (8), Ivonne (8), jackminnich (8), Jackow97 (8), JacksonShriver (8), Jacky2509 (8), Jameshwang (8), jangheun93 (8), janjansen (8), jayjay9779 (8), jbensley (8), jeny (8), jessycj (8), Jesusfreak77 (8), jewel (8), jfwoo718 (8), jhdewitt (8), jimlaurent (8), jk30ogle (8), jld592 (8), jmarolf (8), joe\_b (8), joel0831 (8), joeywood2 (8), johnm619 (8), johnnyrico (8), jonathancummings (8), JordanKlag (8), jos852 (8), JosephB (8), joshyu2001 (8), jouan51 (8), jpsbury (8), JPTucker (8), js\_kim (8), jstafura (8), jswha11 (8), Juenk (8), julieberry (8), julka (8), junipersmith (8), jwbodyworker (8), Jyba (8), kag (8), KairosZD (8), Kaiser01 (8), kalidwapur (8), kaniblu (8), karenana (8), Karolinek (8), Kashahara (8), KateStone (8), kathycrawford (8), kaznaov (8), kcondillac (8), keccle (8), kelley1028 (8), kenphyschem (8), kenzieelda (8), ketanx66 (8), kether (8), Kevine12199 (8), kgy0920 (8), KHB (8), kiara (8), KimberlyMorgan (8), KingKruph (8), kingzan (8), Kittymaniac (8), kiwlgus1 (8), kjake (8), kjmq1234 (8), kkoskal (8), kkp987 (8), klapka (8), klharmeyer (8), kludgy (8), kondi666 (8), koquito (8), kostashat (8), kotzen (8), kourouklides (8), kpnorway (8), kppador (8), kredsun (8), kristianhacker (8), krumpr (8), kuaji (8), kunho817 (8), kurtopia (8), kweidlich (8), kyc0530 (8), kyj4070 (8), kyuubidemon (8), lalbrecht (8), larspli (8), Lauritzen54 (8), lazybuddha (8), LCA4110 (8), Leeklee (8), leeseungig89 (8), leetus (8), lenca (8), lennerb (8), Leslie55 (8), liahong (8), liartar (8), liesbethD (8), lilia (8), lilingxiao (8), lirish (8), lisadcoupon (8), LizetteNL (8), lizzyannez (8), ljpark1 (8), lkuntz (8), LMAN (8), lobotomi (8), lodidan (8), lolovonho (8), lookas (8), lordofthelols (8), lospalos (8), lucascp (8), lucasdark (8), lucasw (8), lucien28 (8), LuckyStrike (8), Ludgenstein (8), ludovic (8), lue0422 (8), luismg94 (8), lukeaaa1 (8), lummi (8), lunastra (8), LyannaGreenleaf (8), Lycosa (8), Lynn\_Mar (8), Mabelle (8), Madda93 (8), MadScientist69 (8), maed (8), maksym (8), mandy1335 (8), marci\_wor (8), marclepape (8), Marcus210183 (8), Marethyu (8), Mari\_G (8), Marleyzs (8), MartaP (8), Martinqua (8), masqn (8), matticusb (8), mauroborgesm (8), Max7 (8), mayadura (8), mcbaxter (8), mcoolcat (8), mchusid (8), mechanic2002 (8), medeleine (8), megan.sherwood (8), Mentis (8), meself (8), metametaphor (8), mhigginbotham (8), michaloace123 (8), michelle32720 (8), michellecai (8), Miguelpic (8), mike.f (8), minci\_tw (8), Minotaur (8), mirjana1 (8), mirko.renzetti (8), mitchellhenr (8), mjharris2407 (8), mjmaki (8), mkomorowski (8), mm-meeee (8), mnews7 (8), Moalix (8), modestgoddess (8), moloth (8), monkeystriker (8), morgantao (8), moritz (8), morphocr (8), mr3536 (8), mrheghemon (8), mridul.khan (8), mrt036 (8), mrxmath (8), mtucker (8), mvarnold (8), myaushka (8), MyNameIsBeki (8), n4gu4l (8), na\_yana (8), Naap (8), nabeelht (8), Nadissa (8), NadsMushtaco (8), naruto21 (8), Nassar (8), Natalib (8), natashak (8), nbleumink (8), nbrack (8), nelwoot (8), NeoLee (8), NeoPunk (8), nerveendingrage (8), neuromaniac (8), neuron\_hunter (8), nevets95 (8), new27kr (8), nguyenhoangan (8), Nickj (8), NickKatz (8), nidal (8), Niemrawy (8), ninaclong13 (8), Nirwana (8), nivo (8), noimplayerone (8), noob\_scientist (8), noosquest (8), nottnic (8), NovikovaNN (8), nusee (8), nutxx (8), oevalley (8), ojmatte (8), okramonster (8), olea (8), olga\_v (8), olgakos (8), omarzaki (8), onlywithnumbers (8), Ordo (8), Ostas (8), Outline (8), ovhendrick1 (8), palaslet (8), palesz (8), paloma26 (8), palovoi (8), paolapinilla (8), Paolo (8), pappasadrian (8), parkmoc1 (8), patrick\_k\_94 (8), paulamiyazaki (8), pawmot (8), PepsiMonkey (8), perkamma (8), phdfluff (8), philkeating (8), pier5362 (8), pippa (8), pirateengineer (8), piuma (8), pkcobb (8), Pkorrapati (8), plastek11 (8), plk3000 (8), pocet25 (8), podzol (8), polarcollision (8), potbelly (8), praalka (8), ptlis (8), PutaMadre (8), pwydud (8), pyrohippie (8), qingning (8), qkralsdud250 (8), qoagksakfl (8), qraq (8), QRing (8), quietcanadian (8), r4man (8), radagast88 (8), ralal500 (8), ralph26 (8), ralucav (8), rambob (8), redbecca (8), redrexford (8), Reinz (8), rekage (8), rercxz1003 (8), RetinoidX (8), riana0 (8), rianonca (8), RicardoGalabru (8), richard.shi (8), richardb (8), RichardCao (8), RichieB (8), ricsinaruto (8), ring12 (8), RishabPrakash (8), rjssjakdmf377 (8), rlaqjawns115 (8), rmarox (8), roberth13605 (8), robin20102010 (8), RogueVol (8), romanchicheck (8), ronicat (8), rubyneko (8), rvasen (8), rwalt1080 (8), ryul126 (8), s2griffi (8), sakazulu (8), salope88 (8), Samaelle (8), samuraisams25 (8), sarahliebeopto3 (8), Sarek81m (8), sarni (8), savingyoulovingyou (8), sbridges86 (8), scavenger (8), schlion (8), scientifics (8), Sctnsuz (8), squadra (8), sdrexler (8), seo1bella (8), seobok (8), sera6664 (8), serdan (8), serpdragon (8), shadow4shadow (8), Shaelz (8), sharpturn (8), shelbypup252 (8), sherryyang (8), shinon (8), shounak (8), ShubhangA (8), Sigrun (8), silentplummet (8), Simga (8), sindd925 (8), skip (8), skittlekat (8), skyarbun (8), slartii (8), smellott67 (8), smerten2 (8), smilesihi14 (8), smileyrak (8), smirks (8), smokybrown (8), smudgepot (8), sn333915 (8), snailbro (8), snailman (8), soccerkid (8), sohaibl (8), solasmith (8), solchant (8), sootty (8), sophiaxlm (8), Sophie5278 (8), Soren (8), sphrs (8), sphynn (8), SpiderMonkey990 (8),

Spoc (8), spyguy99 (8), sresr (8), sss2697 (8), starblast97 (8), stardotjpg (8), steamer360 (8), StefanPejic (8), stenick (8), stygmia (8), su\_min (8), sullivanj34 (8), sunupigamer (8), supervishman (8), suro2010 (8), susucharlie (8), Sweet-Skies (8), swoffler (8), syj4207 (8), sylru (8), Takara (8), talianassi (8), tardislady (8), taurus12 (8), tb8933 (8), tbex (8), teknowlogysltns (8), temirlan (8), teos (8), TerryVog (8), Tesseract42 (8), thalesomilios (8), The\_Great\_Polloman (8), The1NerdyShow (8), theboyhalstead (8), thefirstchild99 (8), ThePersonInTheMirror (8), thepirho (8), theredswin50 (8), theslowkame (8), threetreesknees (8), thewastedkid (8), thfqls22 (8), thinknew59 (8), thinmanjones (8), thisman-haslazers (8), tig04260 (8), timfaber (8), tjs1497 (8), tjsdydghks (8), tlgs362514 (8), tmdejr4234 (8), toddeade (8), toddsns (8), tom\_the\_bikeman (8), tommy\_locker (8), Tonnikana (8), tproveau (8), tragicvisions (8), Trainjumper (8), triipaxx (8), tristankos (8), TurkeyBone (8), turoni (8), tutaysalgir (8), Twiggy (8), tyleranthony (8), tylerbarron\_ (8), tymmy (8), TyphoidMary (8), up2ceo (8), urbanspartan (8), Ursa (8), V3XT (8), Valdja (8), vailleleu (8), vanadium (8), Varela (8), vbdetlevvb (8), venndiagrams (8), verofuld (8), vgmoss2007 (8), vikmix (8), vikthorms (8), vjfrldk12 (8), VladimirKuchar (8), vogt (8), VulKenZ (8), Wally (8), WangKE (8), Warnera (8), warthog (8), weez007 (8), weilin (8), weio80 (8), whale35 (8), Whaler2D (8), Wickie (8), wildermuth (8), williamw (8), wisp (8), wjddmago (8), wlstjs5547 (8), Woguls (8), WONKMASTER5000 (8), Xano2204 (8), xgsteve (8), Xillez (8), Xinn (8), xixina (8), xt\_hydra (8), xyzsignal (8), yazyk (8), yehho0225 (8), yesimemma (8), Yevrah6 (8), yiminjune (8), yinglin930 (8), yjm3743 (8), yni1089 (8), yogi1815 (8), yoochnori (8), YoshiSnipo (8), ysck (8), yujaekn (8), zache (8), Zalasar (8), zannon13 (8), zarkony (8), zat3am (8), zeed (8), Zhabaloid (8), zhou78yang (8), zjh (8), zlateski (8), zommuter (8), zovkf3812 (8), Zowkaii (8), Zyra (8), \_dianarz (7), \_ProxyFamily\_ (7), 1041830495 (7), 10kingson (7), 1ender (7), 4801365354 (7), 6712kyh (7), 748j (7), 8367746 (7), 970505 (7), 971044 (7), a\_delage1 (7), aaal (7), aasdqwe (7), abbynoonan (7), abchaz (7), abhishekchauhan (7), Abrar (7), AbsolZ (7), acelia (7), acun1994 (7), adelvecchio (7), aefreedman (7), afafaf135 (7), afm0598 (7), agaffes (7), agfarnsworth (7), Agnete (7), agneu (7), aguilera614 (7), aguslopezr (7), Aguzska91 (7), agx1 (7), aideenoleary (7), Ainur (7), ajpn (7), ajw725 (7), AK22 (7), Akerus (7), akimble (7), alak (7), AlamIztac (7), alanm (7), alchemist (7), alejanmat (7), aleonard5029 (7), alexanderp (7), alexdel-lapia (7), Alexoww1 (7), Alfiebike (7), Alilililas (7), alloy (7), almaury (7), almostincognito (7), AlphaWolfSam (7), AlyoSHa (7), amberelongo (7), amlai (7), amuhr (7), anadelvecchio (7), anasn12 (7), Anasown (7), Anatatachi (7), anca\_munteanu (7), And250 (7), Andrew85 (7), AndrewJ27377 (7), andrun1 (7), andvaranaut (7), andyinchicago (7), angrydropbear (7), ankerstjerne (7), ankolix (7), Anorak (7), Anthrax (7), AntonBelyy (7), aornelas1987 (7), archavez (7), argus25 (7), Ariena (7), Arlen0414 (7), arnold118118 (7), artek\_chumak (7), artvan (7), ashi009 (7), Astrapien (7), ataquino14 (7), AutumnEquinox (7), avalona (7), avilagab (7), AvoidTheVoid (7), awesomealex007 (7), ba1r0g (7), baconisawesome (7), baldur13 (7), balinkingofmoria (7), banji (7), barfuss (7), baryy (7), basiamadej (7), beatkemist (7), beaver\_545 (7), becursed (7), beewee (7), BellaMQ (7), Benneuro (7), BFG1992 (7), bilbo111 (7), billem (7), binary\_riot (7), bird2750 (7), bivhitscar (7), Blablio (7), Blahgory (7), Blainedmcc (7), blakymcblack (7), Blazej (7), Blindman (7), blockade (7), blubberbernd (7), blueu82 (7), Blupy (7), bmauchly (7), bobby1818 (7), bobly22 (7), bom249 (7), bora750 (7), Boxone (7), brainbunny (7), brainscout (7), bree (7), brentlee (7), brianna (7), Britainia (7), brody.larson (7), bschneider812 (7), buklex (7), Byron\_ (7), c.3000 (7), c4ldy (7), caferacer (7), caipomat (7), calathai (7), calltt42 (7), calvarex (7), camden (7), camirandiwe (7), cannibalnakki (7), Caramelstew (7), carpulskis (7), cedrou (7), celisoft (7), cellmats (7), celloguy0322 (7), cheister (7), cherrie (7), chikanamakalaka (7), chloewheeler (7), ChnZ (7), choiy50 (7), christeiaene (7), chs9142 (7), chung8615 (7), cj1258 (7), cjolmsted (7), claudia258 (7), ClayandStone (7), cloudartisan (7), CMB123 (7), cmwilson (7), codehyp (7), cogsci\_guy (7), coke3711 (7), coldcom-fort (7), colivarg\_geek4ever (7), Cory\_Baxter (7), cosmos88 (7), coughdrop (7), cozmictigger (7), cranialexplorer (7), crazyjohn (7), CREDIT1 (7), crmardix (7), cruxgen (7), csbarnes (7), ct3071 (7), ctighe (7), CuddleKin (7), Cuine (7), cupcake0526 (7), currygirl (7), cwasley (7), cyborg1 (7), czinck (7), dabrinad (7), daelhorhota (7), dakrapa (7), damast93 (7), danielatamayoa (7), danielle176 (7), DankSquad (7), danz3man (7), darellon (7), darkdawn (7), Dark-steeler (7), darshan (7), dasha\_146 (7), dasyurus (7), dbnader (7), ddloop (7), declan89 (7), Dee\_Does\_Healing (7), deia (7), derin.sevenler (7), dewneweric (7), dhlele05 (7), diannetea (7), diogomreiras (7), DJ\_Noblesse (7), djfdma135 (7), dlalswp91 (7), dlstnsla (7), dna (7), dnjstka98 (7), doctor (7), dojoos (7), domanite (7), doneygal (7), dontrip4 (7), Doriangrey (7), dorothydoll (7), dragongeeek (7), dreahhh (7), drecmurphy (7), DrixSvK (7), DrNoo (7), ds6220 (7), dsilbers (7), dubplate (7), dukefishman (7), dulcynea (7), duralkarel (7), Dyotson (7), eccddb (7), Echinus (7), edu-calvo (7), edyhan (7), Edzia (7), ee11grog (7), Elan (7), elbo13 (7), Electra (7), Elecweasel (7), elena (7), elianah125 (7), elinee (7), emilylikesscience (7), eml (7), emmily\_mobley (7), EmperorHenk (7), engelhak (7), eoint (7), eoleyn-ick (7), erich005 (7), errorjic (7), Eruant (7), estevao578 (7), euan466 (7), eudokia (7), Evan17 (7), evantarrh (7),

EvaWepunkt (7), evelknievel (7), eventjoy.kim (7), evettita (7), extraneous (7), EyEdealist (7), Falant (7), Fansana (7), FATEME (7), fatim2 (7), fedor.grevtsov (7), Fee216 (7), fehays (7), felixgwj (7), FelixKaeufer (7), Ferthrys (7), FGG (7), Fireglaceon4eva (7), fischin101 (7), fizzers (7), flabill (7), FNCHSTX (7), fonytony (7), frank (7), Fredderf (7), freecatliu (7), FreeHaru (7), fretu (7), Friction (7), fsmer (7), gab153 (7), gabegrand (7), gabiz12 (7), galwayjuhi (7), gameover001 (7), gangseolhan (7), gardeniaindigo (7), geneb (7), GenuinePerson (7), gersio (7), Getur (7), gferla (7), Gheerin (7), ghicks (7), gianotts (7), giftculture (7), gmeyer (7), Goof (7), gporter1983 (7), greekcrazy2 (7), green-dodge (7), greyearlsvk (7), GrimReaper (7), gtg098g (7), gur295 (7), Gurk (7), guyute9 (7), h00335 (7), HIGHMANN (7), ha4real (7), hairahana (7), hakenstock (7), halceon (7), hangineer (7), harryzzong (7), haslantis (7), HaTtol (7), havenforfate (7), haz\_622 (7), hcqwd (7), HectorM (7), Helix1 (7), hellcat0306 (7), henry.rang (7), hiacau (7), hi-las60 (7), hjhan06 (7), hmjung (7), hnh5000 (7), hoangflaoxtaf (7), hogamdo5550 (7), holzkleber (7), HorribleIgor (7), house03 (7), hugougougo (7), Hugues (7), hwanok17 (7), hyeli0807 (7), iamagog (7), identi25 (7), iebugh (7), Ieva.K (7), ieydman (7), ignaciofont (7), iiyoung (7), ijbar1245 (7), Ilian (7), ilil01 (7), infecticus (7), insolor (7), instrumentgeek (7), iratecord (7), irclavel (7), iris23 (7), iron\_walrus (7), isaac92 (7), isilrote (7), islandvillage (7), is-raeldiv.111 (7), isratatu (7), issac122 (7), ITSAndroid (7), itsreeneherself (7), j.muntaner (7), j20012 (7), jacob\_caudill (7), jacqobrien (7), jaewoochung7 (7), jaguar98 (7), jakebrooom (7), jal040 (7), Jamaican (7), jamos (7), Jana38 (7), Jared.Hines2015 (7), Jason7777 (7), jasondout (7), jatyahoo (7), Jaz31145 (7), jbohnke (7), jbrosious (7), jcappy (7), jcero004 (7), jcm124 (7), jdudley2020 (7), jecofield (7), jecter (7), jedipi (7), jellejurre (7), Jenius (7), jeongin.kim (7), jerrill (7), JerseyRoyal (7), Jessykings (7), jesxiixiii (7), jfc123 (7), jfedota (7), jgeogy (7), jhk3138 (7), jidan (7), Jieen (7), jinu7621 (7), jjh6315 (7), jjjames (7), jjohnston30 (7), jkilty (7), jkinney23 (7), jlondo55 (7), jobusca (7), joebilly (7), joemaeng (7), joffrey\_baratheon (7), john\_joyce (7), Jokoko (7), jomb (7), jong7562 (7), Jose\_Miguel (7), josearkadio (7), josephwow (7), jpdelacruz (7), jquinn0 (7), jsiegle (7), juan\_darien (7), juan1997 (7), jula36 (7), julianaf (7), julienelson11 (7), jyksolra (7), k\_walek (7), Kalama7\_CLCX (7), kapa381 (7), karlaru (7), karmaart (7), kat92 (7), Katia.Greenleaf (7), Kayson (7), Keensnow (7), kendalaldrige (7), kenjebesen (7), kenny666-cj (7), kerr.simh (7), kertininabox (7), key080103 (7), kierisi (7), killerjman (7), killgus (7), killmay (7), kimichang (7), kimsan0622 (7), kjetter (7), kk72390 (7), kkdudrhkd (7), kkonio30 (7), kmk660 (7), knell (7), kokoparkletal (7), Kolan (7), konan (7), kosturn (7), kowalkr (7), kpentila (7), kramerbaby (7), ksauce7 (7), kukupark (7), kurimasta (7), KurokiNii (7), kuu0404 (7), kwokandy (7), kyh0618 (7), ladybirdman (7), Ladyboy (7), laffers (7), lala30 (7), lapeire\_laurent (7), lar1997 (7), LauraFoy (7), lauren1056 (7), lawmer (7), lazysherpa (7), ldh6424 (7), leafytrees (7), leesy0212 (7), leggman7 (7), Leju050 (7), Leon248 (7), leonardousta (7), lepa22 (7), levarett (7), lexa (7), lexikan (7), LgBadluck (7), lifeisgone (7), Lila10310 (7), liverlover (7), liz29walker (7), lizanopl (7), lkh3691 (7), lkhyun5025 (7), lkyd34 (7), lmcq (7), Improsa (7), lmskk00 (7), locjoe.91 (7), loganfeuston (7), loganpettit (7), Lokster2k (7), lolian (7), lonneer (7), lotail (7), lquirola (7), lrdrzy (7), lthom122 (7), lucemia (7), lucsky1234567890 (7), luigiC (7), m1arteag (7), m2louie (7), macbeththescientist (7), machmuel (7), Mad\_Max (7), MadDevil (7), maddm4tt (7), madihas (7), makenzierhea (7), malantur (7), mar\_mas (7), mara (7), mare789 (7), margea\_oana (7), MariahA (7), marina\_parhomenko (7), marvels0001 (7), maschon0 (7), mashka4science (7), Mason. (7), masseyeye (7), Master\_E (7), matija123 (7), matt333 (7), mattburroughs93 (7), Maurits (7), mccord42 (7), mcglk (7), MCRenato (7), me\_kelly (7), Medea (7), medibms (7), meh357 (7), melon888 (7), mengxh (7), messg (7), mewillis (7), mezzagod (7), mfgrossi85 (7), MGDeBock (7), Michael\_Dy (7), michaelhimebauch (7), micron (7), midwestrain (7), mien007 (7), miguelpi-quet (7), mikeh (7), mikepagect (7), MILKY\_WAY (7), Milosh (7), min4103 (7), mindmapper (7), Mindovermatter (7), minimal (7), minse1004 (7), mirasol (7), miskywilkshake (7), missck (7), Mitodina (7), Mjajok (7), mjimalc (7), mkc1003 (7), ml92107722 (7), mlhoffmann (7), mmikolajek25 (7), mmoran (7), modri (7), Mouse36 (7), mprichar (7), mr\_martucus (7), Mr.Finkle (7), MrAsura (7), mrpke (7), mrrobot (7), mrtomothy (7), msangelina (7), msmolira (7), mtronier (7), murfi (7), muscaria (7), Mushroompie (7), mustafina (7), mustek (7), myocean0515 (7), n3now (7), nabl (7), nadavbl (7), NadinePokerface (7), nahgem64 (7), Nahuel (7), naiswarya (7), Namo (7), NANGHIN (7), Napoleon (7), nasaman1006 (7), natasha27 (7), NatureHack11 (7), Nazzz (7), nekresh (7), neomasta (7), Neuro\_Ricy (7), neuro\_scientist (7), newfawks (7), newlunarrepublic (7), nhb8258 (7), nickeubank (7), nico1417 (7), nienke23 (7), nikkitta (7), nitrodog96 (7), Nixxie (7), noahsarc00 (7), nolanra (7), NoodleInspector (7), Norbertoni74 (7), NotEin-stein (7), nownie (7), nparikh13 (7), OGHatoMarques (7), ogmudfish (7), oldherty (7), Olin\_Sandman (7), oliviern (7), oozn (7), ordnael (7), pablogr (7), palmendras (7), palsir (7), pandasarecute (7), panlacina (7), Pao0T (7), papla221 (7), papo (7), patchynanami (7), Paulitha (7), PauloRP (7), peiders (7), pelia (7), penguinjolgui (7), peppermintaro (7), per1970 (7), perival (7), perrym (7), peterexner (7), petri0317 (7), Petrina (7), pgr3211 (7), Pharao89 (7), Philfly

(7), philipbelin (7), phoenix72 (7), phuey2003 (7), Phytos (7), picknasty (7), pilotymc (7), Pindar (7), pinebugz (7), piri321 (7), pisces790220 (7), pixels (7), pjeon7 (7), plokrgaia (7), plotinus (7), pluggedman (7), pokeball99 (7), prasant94 (7), prezist (7), prishask (7), professor\_hoo (7), ProtoFury (7), proudmmof3 (7), Proximo (7), proxyspace (7), psychecorone (7), psychodre (7), quaping (7), queenme (7), quinzunix (7), Quirky\_Panda (7), qwed117 (7), r2dchu (7), rabbitis (7), rachelanneadams (7), RadiumBlue (7), radu (7), raduga (7), Rae\_Glover (7), RainbowKitten (7), rainbowraptor (7), raizen (7), raku87 (7), Rallokondar (7), randomblahnomina (7), Rangwe (7), raszki (7), rattailboy (7), raspberry (7), rc\_guy (7), rchoppin (7), redfish (7), RedScarf (7), reesd (7), reighley (7), relativna (7), renatad (7), rengineerman (7), Reverse3ngineer (7), Reyzkage (7), rezen80 (7), RHG06 (7), rida\_khan (7), rine5438 (7), Ritaza (7), rkdfhr1234 (7), roanhaggar1996 (7), robotechscifi (7), rodkjaer (7), rodrigoem (7), rohsikdak (7), ronny1 (7), ronok (7), Rony74 (7), roscogamlee (7), rosslh (7), RottenRanger (7), rse123w1 (7), rslack (7), rumento (7), rwalker89 (7), ryukim100 (7), s2bin26 (7), sacomp (7), sahyung2004 (7), salrach (7), sam\_s115 (7), samanthamusho (7), samir55 (7), Sandranich (7), sandutil (7), Sanitoast (7), sarahthekilljoy (7), Sashko (7), sayremar7154 (7), sbwoodside (7), schmeckt (7), schnuersenkel (7), scumdog (7), scuravolpe (7), sdowning10 (7), selamg (7), seo0310 (7), seogw86 (7), seoyoon0814 (7), seslater (7), ShadowBlitz44 (7), sharons (7), sharpalex85 (7), shesse (7), shlove0607 (7), shrein (7), shyder1 (7), siegfried (7), Silverwolf (7), silvio (7), singsuna (7), SirSpectre (7), SixOThree (7), sj04046 (7), sk2000c (7), skane2 (7), skfro7127 (7), SkyHunter (7), skyox93 (7), SlaxXx (7), slkates (7), sllan741 (7), Smeghead (7), sncom1010 (7), Snowden (7), soo7935 (7), Soulegion (7), Spathiwa (7), spjd (7), spoonface (7), starkkcontrast (7), stephlopezq (7), StiMiGehhilfe (7), stokf004 (7), stonessalive (7), stoobla (7), stroumpfc (7), study1 (7), study2 (7), stump26 (7), StupaSachi (7), Subnet (7), subsubl (7), superfreddchen (7), surferproyo (7), suttipongg (7), sylvain5 (7), synapticrez (7), taco6464 (7), taffymieh (7), Talleus (7), Tancki (7), tango1123 (7), tardis (7), tarunnaidu (7), TaterChip (7), taylorbrogan (7), tbkvamme (7), techplex (7), tehdave (7), templen (7), temujin4 (7), testtesttesttestes0 (7), texaholdem16 (7), Textmarker490 (7), tgitllet1 (7), tgoodridge91 (7), that\_random\_guy45 (7), thecrazymadman (7), thedominator42 (7), theforce (7), theIllustrator (7), thelma (7), therabidnicole (7), thomaskoike (7), Thoringold (7), Tibbothy (7), tierrany6 (7), tiffanymariko (7), timbomchoi (7), Timeless (7), timelocker (7), timesquirrel (7), tjddbse (7), tkarssli (7), tkaxotjd (7), tkgus0108 (7), tmdgml4512 (7), toaster262 (7), tobies (7), tof152 (7), toincorten (7), tom9842 (7), tomeryona (7), Top\_Sandwich (7), tote katze (7), totoro (7), trabe3 (7), trac (7), traeble (7), Treas (7), trollfazz (7), TryHard2015 (7), ttomisin (7), tubagirl (7), TVC7 (7), tvverquoise (7), TwizzlerGrrl (7), TyGuy6 (7), tyler (7), tzameti (7), unheardstingray (7), unicornwolf (7), unitatem (7), urharm (7), usky (7), v01d (7), vaki (7), vandingo99 (7), vartier (7), Vaxelion (7), vespenn (7), vidalin (7), viestursn (7), vigana (7), vinnio (7), Voyslav (7), vqtwtk37vg (7), wakebob (7), Wargo (7), wblee (7), wccrawford (7), weng\_010 (7), werwerwaelton (7), wesselinator (7), whitman (7), whuber (7), willetk (7), wilsonfrost6886 (7), wina754 (7), wireless\_jellyfish (7), wiserlix (7), wjdtmddnr24 (7), wkdtnaos111 (7), wnstj9440 (7), Worschkalli (7), wrlatkdals (7), wueba (7), wythem (7), xdilias (7), xignus (7), xkup2000x (7), xniggox23 (7), xytor (7), yandle (7), Yaruson (7), YeceniaArellano (7), yeong1209 (7), yixin80808 (7), yohui (7), yoshiyaki (7), yourim4360 (7), ysp918 (7), Yuenyingha (7), yulpen (7), yuo0205 (7), yy369 (7), zekoski (7), zencopyright (7), Zevs (7), zigongo (7), Zinul (7), zipp3r (7), ziquafy (7), zls (7), zornita (7), zsoares (7), Zt (7), zzleedy (7), \_davee\_ (6), 1024973373 (6), 13lackyTheKid (6), 246nat (6), 290406661 (6), 3.141592654 (6), 89029 (6), A\_Niebuhr (6), aaayjh8575 (6), aabu (6), abekatz11 (6), abencomo14 (6), abinor (6), acaranta (6), acis-sej33 (6), acordova (6), acrotto (6), adamfas91 (6), adamqashou (6), adamsj991 (6), adenzine (6), adreeej (6), aegle (6), aerolin (6), afakaz (6), agalexandro16 (6), agomar (6), agujas (6), ahreump (6), AidMurp (6), ajl27 (6), AkaRiNa (6), akhalifa (6), aksel (6), Alandra\_Blue (6), alaskatyler (6), Aleix (6), alex.kulagin (6), Alexina (6), alexprodi (6), Alfalfa (6), alferis (6), Alinemarie (6), alko\_rism (6), all035 (6), almudena (6), alnocom (6), Alvaro\_Gohe (6), alvill (6), amandaann (6), amchance (6), ames89 (6), ammo (6), amsilva (6), anastasia (6), Andilus (6), andreapisauro (6), AndrewSimon (6), andriejunas (6), androidwheat (6), andyruan (6), angelachou6 (6), angelcake (6), Angelo94 (6), anickalara7 (6), anlo (6), annabherbst (6), annaewill (6), annafarrell4 (6), Anthony\_p (6), apmoore (6), apxmajor (6), aquajet17 (6), Archigad (6), area51brett (6), Ark5 (6), aseep3 (6), asthmatcinnija (6), auntkim (6), aussielaxymisty (6), auster (6), autiger98 (6), awesomemamer12 (6), AxKee141 (6), azis (6), babbleon (6), babol (6), bacol89 (6), badams214 (6), BadWeatherPlayer (6), barbaraaf (6), bartlawless (6), BastianZ (6), BatMan808 (6), batsheva\_sarah (6), bbibbi8014 (6), beast11 (6), bediko (6), bembellebee (6), bennelson (6), BenP (6), berkmerk (6), bettiocracker (6), betzsg (6), BIG\_jan (6), biggee73 (6), billygoat (6), Biomfire (6), birddogg (6), BlackDiamond (6), blackwolfn (6), blackwyvern (6), bleuhesperus (6), Blizzrd3 (6), bloodbind (6), blue3594 (6), blueluke123 (6), bluk (6), Bluume (6), bob0684 (6), Bobberick (6), Bobik0195 (6), BobToms (6), boohbug (6), booi (6), borgind420 (6), Bourbeau (6), brab-



baboo (6), brainbox (6), BrainGhost01 (6), bretfrd (6), brettmelton (6), bri0103 (6), bro (6), brriiaanna\_ (6), brucelee (6), BryanDamas7 (6), bsampainho (6), burrhead (6), bushidofaith (6), bwziener (6), caitlinpigott (6), callegan (6), Calo (6), calvein (6), campbelliah (6), CanisKitty (6), capjjambo (6), Carl\_E (6), carterman200 (6), Casey.Finley (6), catfrog (6), ccs (6), cecilmarie (6), Cenveo (6), cgarciae (6), CH (6), chalsman (6), chaoservices (6), ChaoticSkies (6), cheekygal88 (6), chefdaniel (6), Chelsea2012 (6), ches (6), Chew13acca (6), chibaby7 (6), chica2 (6), chindi (6), chizuk02 (6), chlckdghks (6), choijanggyu (6), choirbean (6), chrislaun (6), Christian\_1979 (6), chronaut (6), chulokao (6), cielcrow (6), cjfisher (6), cjshark529 (6), cjstkd0929 (6), cloud (6), cluster82 (6), Cobralilie (6), cobrien8 (6), colleenmellinger (6), comet1213 (6), comic0913 (6), connectivity (6), conway5400 (6), cookiecupcakes (6), coor200 (6), corey529 (6), correlated (6), Corvorax (6), corzara (6), Cpdukeguy24 (6), craigfl (6), crculpep (6), cree (6), crystalhoyt44 (6), cryterra (6), csande11 (6), cshem (6), CsUBeE (6), Cuddy (6), cwalshwarder123 (6), cwilson39 (6), CWow0204 (6), CWP (6), d5d5d5 (6), daafroman (6), dadadams (6), damien74500 (6), Dancraft (6), Dani\_Leon (6), Danmax (6), Darkcaller (6), Darnell (6), Dartrox (6), dashamashanova (6), DaveRoberts (6), davidfg4 (6), davidhy109 (6), davis2 (6), dbstn8175 (6), ddong7276 (6), deadhead14 (6), deadity (6), deannainpower (6), DelaineS (6), delanova (6), dennis126 (6), dergjoel (6), desch86 (6), Desiderium (6), Devcon (6), devilsfood2005 (6), dgcoutts (6), dgeoe (6), dgheck (6), DhuumB (6), diazepam (6), DimitrisBoulougari (6), disparate\_dejure (6), dleals2000 (6), DLichti (6), Dlnvrhs (6), dmssmsdlrk (6), Dnalom (6), dnu06133 (6), do8067 (6), dobispr (6), doggoesbarkbark (6), domini (6), DONKEYKONGLIKER (6), doroteazefic (6), douglas32 (6), douira (6), dpeters905 (6), dpooles (6), Dr\_Lee (6), dr\_weird\_ (6), dragonkingme (6), Drewskie92 (6), DrL (6), drmazz (6), drrocco (6), dslyexiac (6), dthoreau (6), dude111 (6), duma (6), duswl3129 (6), dxmaster1994 (6), dzerbino (6), dzigma (6), ecinbd38 (6), eehrman92 (6), effort (6), efthimi (6), EinsteintheRapper (6), ejzuz (6), ekathrynk (6), elimaoliv (6), elle518 (6), ellethorn (6), ellisgame (6), Elrick (6), emarchiondo (6), emilieshen (6), emilydillon (6), emilyred (6), Emmanems (6), empress (6), emrehandan (6), encarrillo (6), Engine (6), engine9 (6), EngineerGamer (6), enoelke (6), eppy (6), ericg (6), ErnestUK (6), etienne.st.clair (6), etude (6), EvaJ (6), evand (6), evil (6), Exiled\_wolf (6), extruder (6), eyeguy123 (6), Eyewireuser1 (6), FaZe\_COD (6), fdsfdsvxcfasd (6), Fellfalla (6), felpen (6), finagle29 (6), fir310rd1 (6), firefueled (6), flames1610 (6), flan0129 (6), flank (6), flatorien (6), florelak (6), Foe.Hammer (6), fohrer (6), foia (6), fokkarin (6), Fortune.C (6), fourstar22 (6), foxphyre (6), frabalena (6), franiu222 (6), frecel (6), Fret (6), fritule (6), FunnyBunny1234 (6), furtim (6), fvilledary (6), galica (6), ganqqwerty (6), Gargelwarg (6), Garrygun (6), gary.neely (6), Gates (6), gayle (6), gcarm52 (6), Geaelith (6), gebaruc (6), gemaxos (6), geoff.abbate (6), gerard997 (6), gfoursa (6), gilliangiraffe (6), glennchanimal (6), glesterseq (6), gman927 (6), Godxstorms (6), goliath42003 (6), gollaber (6), gople90 (6), gonzialo (6), gopher78 (6), graasmund (6), grantmcme (6), GreekPirate1259 (6), greneffect (6), greenesm (6), grimattes (6), Groiny (6), grooVe (6), gruba\_wrozka (6), gssure (6), guest2014 (6), guest8981 (6), guibarbaresco (6), gustmd254 (6), guteal (6), habiola (6), hairyplodder (6), hallvard (6), hanson1012 (6), hardcell (6), harrychiling (6), harrypinder (6), harrythecat01 (6), HarveyX2 (6), hastur1090 (6), heatherupton (6), heiko.schmidt87 (6), heng2180 (6), henkeq (6), Hey\_Hoy (6), hfink (6), hhhsss0815 (6), hinee1 (6), HistoryReader (6), Hj.Hubmann (6), hjj0805 (6), hl5qo (6), Holtkf (6), holzfaeller15 (6), honeywhite (6), honiebe18 (6), horst666 (6), hpi01 (6), hracooper (6), htfu1969 (6), Hugo92 (6), hwarchitect (6), hym718 (6), hypersquad452 (6), hyunjooohan (6), ianhein (6), ibukisaar (6), Icanhazchzburgr (6), icetulyte (6), IDKlol (6), iliana (6), imabruser (6), iman (6), imphobia (6), imWUMPUS (6), ineffableoxymoron (6), Infinaa (6), insightunsound (6), iqweryasdfjb (6), Iridescent (6), ironoracle (6), irving (6), ispywithewire (6), iwirebrain (6), izziepop13 (6), izzybartell (6), J4IqTM3e (6), Jackyman (6), jaco6982 (6), jacquid (6), jadamwilson (6), JadeOrchid (6), jaejae2780 (6), jaggkhan (6), jaheredi (6), jaikdean (6), jalane (6), jamesin (6), Jameswongx008 (6), JamieBoy\_ (6), janne95 (6), jar9014 (6), javatea (6), jayarrgh (6), jaydenfish (6), jays1610 (6), JBastian (6), jblzzang (6), jcsmo (6), JDHolic (6), jechang05 (6), jekshmeck (6), jenhau (6), jennifersb (6), jennul87 (6), jemp0 (6), jensb (6), jeremyd (6), Jerrold (6), JesseM (6), jessiewang72 (6), jharristemp (6), jimmers1231 (6), jiniwindong (6), jjohan (6), jjross19 (6), jjunpj (6), jlmichalow (6), jlosaf (6), Jobed (6), Joczsa (6), joelfirenze (6), johnny1 (6), jonathanbund (6), josepaul01 (6), josephsk (6), Joshua1 (6), josiahmix (6), joycemegu (6), jpgarnham (6), JPMA29 (6), jps (6), jsab (6), Jsp710 (6), judgefreak (6), Juho (6), Juliapatt (6), JuneYoung (6), justinscifo (6), jyg318 (6), jzakora (6), jzeltner (6), k4j1j7 (6), kacrenella (6), kalar (6), kallidoan (6), kanghunlee (6), karindii (6), Karliisy (6), KateMitre (6), kayingwu (6), kchambliss (6), Keith1 (6), kekek420 (6), kennon (6), kenny12 (6), Keradon (6), kerr (6), Kes (6), KevinChou (6), kevinirwin69 (6), kf12 (6), kgawlich (6), kgmww (6), kgrl01 (6), khill64 (6), khmo0062 (6), khsshhome (6), kilduffthe7 (6), kinahoo992 (6), kinglear (6), Kinoss (6), Kira (6), kj051130 (6), kjeld (6), kjh93542200 (6), kjms56 (6), kkn17820 (6), kkomaragiri (6), kkubera (6), kmai (6), kmihaloew (6), kmunro18

(6), knots (6), knowledgeRT (6), Knuttas (6), krepoort (6), kristinpike2 (6), kschon (6), ksenijak (6), ksh960215 (6), kuba591 (6), kukur (6), KurtDrueke (6), kurumi (6), kylef59 (6), kyt2400 (6), LadyVader (6), Lalaps (6), lallezzz (6), lamurmel (6), laurag118 (6), lauralh (6), lavando (6), lazerblazer93 (6), lcarson (6), lcm980625 (6), ldcsgof (6), ldcsmck (6), LEEJUNYUP (6), legomyth (6), leprechaun (6), lesardah (6), LeslieFgso (6), lfscouts12 (6), lgallowi (6), lidiatho (6), lird2358 (6), lithe333 (6), lithium\_hat (6), liulilark (6), livignPotato (6), ljstewarttweet (6), lkjh2558 (6), lkyez9 (6), london0521 (6), lonybee (6), loomis (6), lorentzben1120 (6), Lorenz11 (6), losiana (6), lpl2001 (6), lruberti20 (6), lsmith (6), ltmcmill (6), Luigi\_Nono (6), Luiser (6), luisrr (6), lukasabel94 (6), lukerussell (6), lun0807 (6), lunasea06 (6), lux.astraea (6), lvoshell (6), lxswiss (6), Lyuboslav (6), M.samy (6), m0m0 (6), m1bowman (6), MacAnte (6), maciejz (6), maddbookish (6), MadDog (6), MadFeist (6), MadSwami330 (6), MadyMc928 (6), mae-mae16 (6), maesy (6), maggiezum (6), magnuson (6), mahsome (6), makuris (6), malin.anker (6), Mangatorum (6), mapyanjing1 (6), margaret9123 (6), maria\_tchik (6), Mariana6 (6), mariannemacd (6), mariekelieve (6), marker12 (6), markuski (6), martinam (6), Marzell (6), math1tvk (6), Matw016 (6), mavae (6), maverickzod (6), maxhalt (6), maxieeen123 (6), Maxis (6), MayGu (6), mcarden101 (6), mcbridec (6), mdkng128 (6), medievist (6), megcsamuel (6), megwhe (6), Mellifluous (6), member (6), merp1 (6), metalmilitia (6), mhanlon (6), michaelbellis (6), MickeyD (6), micmiask (6), mijej (6), MikePave (6), milenicnikola (6), Mileston (6), minam0217 (6), mindbound (6), minipyre (6), mintmoonpi (6), minu20003 (6), mircha (6), mirkovonberner (6), misc01 (6), misiekovsky (6), mistake (6), mitchmmm (6), mjayjoh (6), mjf277 (6), mkasprzyk (6), mlscout (6), MMBuck (6), mmj2313 (6), Modig (6), moeboy76 (6), mollusk (6), moonlight21 (6), moonlizard (6), morenoman (6), morphew (6), mortisflux (6), moustachen (6), mouze555 (6), mpaetz (6), Mr.Hine (6), mramp (6), mrcubfan415 (6), mrkhaos (6), MrPills (6), mryan33 (6), MsHeltonReads (6), msiconoclastic (6), mstaylor (6), msuss (6), Murray.Smith (6), myms9719 (6), mYndmech (6), mzilber (6), NadjaBee (6), naitSirhc81 (6), Nalien (6), nameno (6), Nannddi (6), nathanrutter (6), ndimensionalbeing (6), ndresch (6), Ne\_for\_Neon (6), Nemtsevp (6), neurogeepster (6), neuroner (6), nevint (6), nezerk (6), nice\_marmot (6), nickbokaie (6), nickenter (6), nickpeq (6), NickSentowski (6), nicogorm (6), nicolaas (6), nicole\_ong (6), nicoleng123 (6), nidor (6), nightcap (6), nika\_lara\_ram (6), ninavelka (6), nine13pm (6), Nipol (6), nirjharzhere (6), nirmal2893 (6), nirvash (6), nk (6), nkso (6), nlowe40 (6), No1LikesSka (6), noeymac (6), noodlefairy (6), noswad92002 (6), nouraldeen (6), novusbovus (6), Nseraf\_is\_cool (6), nvlst00 (6), nwalters512 (6), nxt68 (6), nxxt (6), Nye\_Rhys\_Potter (6), o0c (6), obdulio (6), odebowy (6), offgame (6), oggioniale (6), ohoh55 (6), olee (6), omaomae (6), omk (6), OneWorld (6), ooo8197 (6), opsde (6), oraine (6), original (6), Osiris088794 (6), oterofe (6), ouachiski (6), owen2001 (6), pachuete (6), Packard0622 (6), pakonja (6), Palozano (6), Pampuch (6), panelopeVella (6), paolorechia (6), parganman (6), parietal (6), PaulusMaximus (6), pawelmajchrzak3 (6), pcote (6), pensasota (6), perosa (6), petecc1 (6), Phate (6), Phi\_ (6), phillip1114 (6), pimanguy (6), PinkDeer (6), pjh1912 (6), plainroc (6), playing915 (6), podolsir (6), polarbruski (6), polarhase (6), ponclast (6), Poodie.D (6), porrohman (6), pr0ces (6), prairiekat (6), Priley (6), prisca (6), psaran (6), psj27 (6), pstienstra (6), pswanson (6), r3chu (6), rabot (6), rachaelmary (6), rafiuscsr (6), raidho (6), rampam (6), random (6), randomguy741 (6), rapie.l (6), RaquelR (6), rasfd (6), rayjee (6), Raykurzweil (6), razerdude (6), rbirds (6), rcrmn (6), readit21 (6), reasonius (6), Redian (6), redpumpkin (6), redviper21 (6), redwolf (6), reepy (6), Reichweeme (6), reko90 (6), remmus (6), rene9917 (6), revereche (6), revm3up (6), reyjuan (6), rezaa (6), rhdgpccks12 (6), ribells (6), Riemen (6), rjouellette (6), rnfqnfn (6), RobbieD (6), robert.upitis (6), robertafish (6), Robertgbird (6), RobOtto (6), romana93 (6), rosietee (6), rotflbtc (6), roykingtree (6), rrsrihari047 (6), rumoes (6), Ryanturley (6), Rysa11 (6), s010527 (6), s0204 (6), s10355270 (6), s8liang (6), sadalsuud (6), saffron (6), saibot81 (6), sallydavis (6), sallylucky (6), Salome8 (6), samael.p (6), sami1995 (6), sammi.yu (6), samuel\_bomfim (6), sanak (6), sarahweathers (6), saram (6), sashasashasasha (6), saskek (6), Satrian (6), sbrooke (6), scai (6), sco (6), sconde15 (6), scorntorrent (6), scumbkt19 (6), SDR (6), sean.su (6), seanlim0911 (6), seattlethunder (6), Sekai777 (6), selene018 (6), sephis (6), Sepp123 (6), sethius (6), sfarah1441 (6), sfgoedeken (6), sfinae (6), sfyosick (6), Shadowedpath (6), shakar.lay (6), shamandamin (6), sharkorion (6), shawnecy (6), sheddy (6), shellingford (6), shellm (6), shirleystar80 (6), shorth (6), shrimpboom8 (6), shuang (6), sicki (6), siggenlh (6), simofield (6), Sirre (6), SiuPinGG (6), sj04088 (6), skattan74 (6), slavik1998 (6), sleepie (6), SlopeDoctor (6), slychika (6), Slytherite (6), smartkat17 (6), smaug (6), smetmalvania (6), smillem680 (6), smsy1230 (6), smyth59 (6), Sneaker (6), sniper\_cat (6), snooper (6), snoopy8911 (6), SnowPaw1 (6), SonjaT (6), sonof9 (6), sony345 (6), SoupDragon (6), sowoosung (6), speedit (6), SpeegL (6), spermostrzal69 (6), srx0080 (6), ssr65 (6), Stando (6), staudey (6), steel (6), stegro (6), stephdvd (6), stepowiec (6), steven.malone (6), StewieHK (6), stienkauz (6), strowise (6), subenitez (6), sucrilhoilho (6), suengfe26 (6), sugarship36 (6), sulcj (6), superbosch (6), superbrick (6), supercrazybanan (6), superwholock (6), SupraMayro (6),

svendsen42 (6), svoter (6), swieciak (6), swimthemile (6), Sy (6), sylvan66 (6), sysilion (6), szyba (6), szymcio2001 (6), Szymon56 (6), tabuca (6), TacticalCrowbar (6), talarga08 (6), tanbojian (6), Tao808 (6), taopao (6), tara7 (6), tarbos (6), tarosic (6), Tashabob78 (6), Tazzy (6), tberry678 (6), tbuteau (6), teapath (6), ted\_hou (6), TeslaM (6), the\_rhapsody (6), theclement (6), thegamedad (6), theloobster (6), Theodor (6), TheosNaya (6), theresa123444 (6), therussianbanana (6), thestuffsisgood (6), TheWizardG (6), Thomashiba (6), TiffanyVallejo5 (6), tig06204 (6), time-traveler2035 (6), timmkma (6), TimothyPiton (6), timtim (6), tiogrags (6), tiredboy119 (6), tjay14 (6), tlimmons (6), tmd9595 (6), TMRTLPL (6), Tollikereceptor (6), tomboss (6), tomclegg (6), tomriddle666 (6), tony\_carroll (6), tony927 (6), tonyhull (6), tool (6), TreeFa (6), trendyflyer (6), trexdex (6), Trianne (6), trypto (6), tuby (6), tumblr\_ (6), TvBelow2000 (6), twenty1 (6), twilight0321 (6), ty58925 (6), tydavis444 (6), tylerli (6), Tyquin (6), Ubergoose (6), ubnik (6), uhoh (6), umali (6), UmbralShadow (6), uncommonsense (6), uniman808 (6), uselessname (6), v0llg4s (6), valeosupero (6), vdefranc (6), veda40 (6), velcom (6), Velocitygirl5 (6), Veradrapers (6), veralugo17 (6), vertex-clique (6), vexon (6), vierax (6), Virginijus (6), vitsory1 (6), vivalaik (6), vivianthesecond (6), Vladislav (6), Voidborne (6), volker\_buchta (6), Von\_Hendrik (6), W.W. (6), wael (6), wafehling (6), wanderingmonad (6), wanessacampelo13 (6), Wendy\_Testaburger (6), werebunny (6), wethanc (6), weurhartdezirez (6), whatupsista (6), whiskey1 (6), whyoon6 (6), WillDeuz (6), WinDev (6), WindKeeper (6), winstonzhang (6), wlsthf2489 (6), wodnjs1234 (6), wolfpac24 (6), Worldbeing (6), worldsman (6), wots777 (6), wouterdg94 (6), wsg (6), wwolves93 (6), x5josh5x (6), xelander (6), xinghongli (6), xlbeutel (6), xmael (6), xoxo668 (6), yeonsu.hong (6), yihsuan1230 (6), yiweipin (6), yong0205200 (6), Yorch (6), younha (6), yowdeno (6), yui5129 (6), yunahhan18 (6), Zasmatic (6), ZD003 (6), Zebu123cheer (6), zellody\_roo (6), zerda (6), Zomby (6), ZXC (6), 00sean00 (5), 0119brian (5), 07westa (5), 10093117 (5), 1028833735 (5), 13justing (5), 19jk19jk (5), 1jhjeon (5), 283leis (5), 2noahvail (5), 3NG1N33R (5), 67terzi (5), 709273 (5), 711kwj (5), 8timowu (5), 999474 (5), a1w2c3 (5), aaa (5), Abeshere (5), abp4343 (5), acidtrips (5), acorona2019 (5), AdamarisJayne (5), ademir (5), adj (5), adonizer (5), afinno (5), afiz (5), aggelito112 (5), agith (5), agr (5), ahubbert (5), aidforyou.grijalva (5), albuddah (5), aldegogo (5), alexm2002 (5), alexpalade (5), AlexRomero (5), alexszela (5), AlexUA (5), alferis1521 (5), algore87 (5), Aliceysusi (5), alicjanna (5), aliff7 (5), alimtk (5), alk (5), allure84 (5), alosee (5), alsdud0228 (5), alve37 (5), alvin519 (5), alzflost (5), amanda\_keller (5), amandapeeples (5), Amarek (5), amartig (5), amattiace (5), amijako (5), amortensen (5), amyc (5), amyhub (5), amyithurburn (5), amylynn (5), anandshah (5), ananz (5), andersonhatfield (5), andorman (5), AndrewMatayka (5), angela0martinez (5), AnjavG (5), anna27 (5), annemariestu (5), anomity (5), anonymous929 (5), antalbo (5), antonio (5), anviori (5), aol (5), AON0825 (5), aonik49 (5), appledydgh (5), aqwapengwan (5), Arakan (5), ArcaneBeam (5), archivist1808 (5), areliocana (5), arnon (5), ars0003 (5), arsara (5), ArtemisFey (5), arvina (5), asadireza (5), aseline (5), asfdhg (5), ashabooga (5), asiamd (5), ASR (5), atarasiegel (5), atheismo (5), athenabernal (5), atnguyen (5), atosz89 (5), atward (5), AurealisSky (5), Aurif3x (5), avonhun (5), axe (5), AzimP (5), azira (5), Azzello (5), azzengo (5), b0331053 (5), Babchick (5), Babua (5), badvans (5), badwolf9653 (5), bakr\_m (5), Baldo98 (5), baldur (5), balerios (5), bamaucere (5), Banasi (5), banimal (5), baron (5), barryr (5), Bassel (5), BassmanBiff (5), batpam (5), bb\_mlb\_56 (5), be2ru (5), beast816 (5), bedtimewarrior (5), Bel (5), bellelamadrid (5), Ben.The.Cat (5), BenJarvis (5), Bennington (5), Berasord (5), berren85 (5), bertinumnums (5), Beteigeuze (5), betulpolat (5), bigi1991 (5), bigmick77 (5), bingddi03 (5), biobob (5), bjong (5), bkernan (5), blabbyhappy (5), blackcatsang (5), Blackside (5), blacksun (5), Blackvirus (5), Blkdragon112 (5), Blueberry22 (5), BlueGrey (5), bluxrhapsody281 (5), blwood478 (5), bmirella (5), Bobifx (5), bobothem (5), bonCziki (5), bookattict (5), boswall (5), bperet (5), brainsurfer (5), Brandon32 (5), breathe (5), bridgetj (5), bsallee (5), bstansberry (5), Bujin (5), bulby13 (5), Buzzytop (5), by23 (5), c.harris14 (5), C0dR (5), c7wilshire (5), ca\_sa3000 (5), canadianbacon (5), cancakar (5), candacewang99 (5), Candychan (5), captain\_ian (5), Carble (5), cardsnpats (5), carlos2012 (5), carlosvinicius (5), castard (5), catherine1989 (5), CatLahr (5), Cavapoo (5), cbryant8334 (5), cbuetz (5), cbunster (5), celltj (5), ch3 (5), chad (5), ChadAllan (5), chanapple (5), chaosknight304 (5), Chaoslord83 (5), charlesva (5), ChattGraham (5), cheesebumble (5), cheytac406 (5), Chirsty (5), CHLief (5), choibiza (5), choxvn (5), chris83dd (5), chronicler\_anon (5), Chucy (5), chz3204 (5), cic312 (5), cineman05 (5), CJCK2007 (5), cjeves (5), cjojustesen (5), ckamfung (5), ckerschinske (5), ckingm (5), claudiag\_jou (5), ClemJohn2 (5), clockworkange (5), CNord (5), cnp3ster (5), cochayuyo (5), coldfizz (5), comiversamerenda (5), Communist\_Horse (5), conbon (5), Concha211 (5), constancelee (5), convalisoutlook (5), corsica (5), corstiaan (5), Cosette (5), cosmorules (5), CptBowmore (5), cptcurious (5), crab0929 (5), crb233 (5), cri (5), Criminal\_Kidd (5), crimsonlily (5), crochetrockets (5), crodr021 (5), crodragn (5), crone (5), crontw (5), crs (5), crytk333 (5), ctheworld (5), Cx\_morningstar (5), Cyny (5), daepyung2 (5), Dalia1997 (5), dambar (5), damian (5), damir1510 (5), damon\_yuan (5), dandel (5), dandune (5), dangel (5),

dangidgets (5), danielmanhattan (5), danigirl9000 (5), DaniKrinsky (5), DannyL (5), dantacular (5), dantashman (5), dantiux (5), darfrenk (5), darkknight900 (5), darthrainbow (5), ask91 (5), david\_voodoo (5), davidgfri (5), davidmerma (5), davidschwan (5), daw123 (5), dbernhardt (5), dblboston (5), dbs6339 (5), dcbj (5), DDDaakk (5), deanna (5), deathlord (5), deathvendor (5), debr2121 (5), decap (5), ded (5), dejk11 (5), delta2 (5), Demenos (5), denuro (5), devyntratz (5), dfrank\_a (5), dgoodman (5), dhughes538 (5), di1111 (5), diegovegaa (5), dimitri\_cacouris (5), dinotubz (5), dipoppleton (5), djhk12 (5), dk8dk8 (5), dlktbyvwl (5), dmfunk (5), dmnq44 (5), dmoneypipes (5), dntjd2010 (5), dnrvfantj (5), dolivo (5), dom906 (5), domcaruso (5), Domen (5), dommy13 (5), don\_mums (5), donkeysmash (5), donmatteoSB (5), dougwein (5), doy718 (5), drakger (5), dranore (5), dsalinasee87 (5), dsss (5), dtran8 (5), DualCore (5), dunz (5), Duoflamingo (5), durio1 (5), dvmkim (5), dwdwfadaw (5), dydwkem12 (5), earthmagnet (5), earthrot (5), ebarbrag (5), eberg2018 (5), edmeades (5), Edorico (5), Edvarado12 (5), egab33 (5), ehtreklm (5), ejin (5), ekiping (5), ekurtin2019 (5), eldown (5), eletragon (5), elias1theo (5), eliman (5), elinedesmet (5), eliza123 (5), elizarification (5), EllaAliina (5), elly02 (5), elnene43 (5), eltao (5), emeadow (5), emeast06 (5), emmasmom60 (5), emmettlareaus (5), emorel1091 (5), endios (5), EndWorld (5), enelton1 (5), epoch (5), epst10 (5), errrinnn (5), erunion7 (5), esong1216 (5), estel4me (5), etucker (5), euganot (5), eunnuri0114 (5), evandro\_desouza (5), evenstar15 (5), eward (5), exeedorbit (5), expecticalluloo (5), Eydel (5), eye07 (5), eyetadin (5), fang11 (5), fanzhaoqi (5), fariner (5), fasarias (5), fatzke (5), fdgddgd (5), feistyone (5), Feldaris (5), felixfox (5), femoris (5), ferille (5), fethallah (5), fetus (5), fhks0796 (5), fiddlycat (5), Filippo01 (5), FillyBelle (5), fioranij (5), firedark60 (5), fiterman (5), flo1970 (5), Floonie (5), FlutterBrony (5), Fluxrid3r (5), flwrgirl96 (5), FOLIAGE (5), fordongreeman (5), FoxyCy (5), fprice (5), francesca3464 (5), fraspoki (5), freeshik (5), Fringe (5), front773 (5), fuchsiadaddy (5), Fukano (5), funk (5), funkyduder123 (5), future\_hindmind (5), gabriela (5), gac25 (5), gahl98 (5), galadriel (5), gallifragirl92 (5), gand1 (5), gang (5), garfi (5), gashach (5), gcryzel (5), gctompki0816 (5), Genusor (5), Georg2015 (5), GerriCan (5), gfwalters (5), ghritsko (5), giack (5), gillisma (5), ginnyturne (5), giovanilr (5), gkoster2 (5), glass\_joshua95 (5), gmargolis (5), gmm919 (5), Goal (5), goat29 (5), gocubsgo25 (5), godqhrgo00 (5), godweeno (5), Goldsternchen (5), Goruku (5), gozaliabi (5), GraceMoon (5), grbritz (5), griffin7890 (5), grimb300 (5), grumpy (5), gswagmoney (5), guangala (5), Guginott (5), gus01wls (5), gwynethh (5), gydnjs0710 (5), H137 (5), hal (5), HALEX (5), hamachine (5), Hanibanani (5), hanke (5), hanshorst (5), haplo90 (5), happynus (5), harit1994 (5), HarperB (5), hasif (5), hasturkun (5), hazeop (5), hdob (5), hedaja (5), henryd (5), heojs0413 (5), hermann (5), hesham4488 (5), hezanathos (5), hf995 (5), hgdgid (5), hgw2329 (5), hipposhamu25 (5), hollyeeg (5), HolyPotato (5), horatka (5), horo (5), Hppo (5), hrii (5), hseon9621 (5), hspark (5), hsuby (5), Hulkuleese (5), Hullo (5), humer112 (5), hutchdog (5), hyunjiwi (5), iamjoshua (5), iceman333 (5), ickerish (5), icmolecules (5), icyu (5), idiogo (5), ieva (5), ige3647 (5), igilmore (5), iijnb (5), ike (5), Ilkone (5), immajewel (5), immense010 (5), inapigs2eyes (5), independentowl (5), indiosmo (5), ingskeuh (5), ip81 (5), irukolo (5), isamarina (5), istvan (5), ivanruvi (5), j01993 (5), j3347090 (5), jackh (5), JackHacker (5), jackjennings (5), jackkoulos (5), Jacko9575 (5), jacobscaff (5), jacopocomajoco (5), jadededaj (5), jaex3m (5), Jahr\_Gulden (5), jaj8585 (5), jakub.viglasky (5), Jalal (5), Janiskozinda (5), januzag (5), jc0114 (5), jcaplan (5), jdgl854 (5), Jdiaz.a (5), jdb797 (5), jdy1230 (5), jeddke (5), jedenczterech (5), Jedrzej (5), jeemge01 (5), jefflint (5), jelle (5), jelyn (5), jennifer (5), jerryliu (5), jerryzzz (5), jfqm\_1 (5), Jgmartyr (5), jhjh426 (5), jhne0201 (5), jhoppmann707 (5), jim\_jackson\_71 (5), jimpc (5), Jing (5), JingleBells (5), jjangv2 (5), JJaxx (5), jjih9421 (5), jjm2008 (5), jjo1 (5), jkamins (5), jknuhm (5), jlaz (5), jlfd26 (5), jlhhh (5), jmbarker (5), jmdeberry99 (5), jmwang10584 (5), jnareb (5), Joesmoe (5), johnchre87 (5), JohnKelbaugh (5), johnm211 (5), jon.the.jedi (5), jonatron (5), Jones150 (5), jonesje (5), jonrhost (5), jorr45 (5), joseph\_S (5), josh1800 (5), Joshsss (5), joshua.k.warlick (5), josie (5), Jovana (5), jpelberfeld (5), jps27 (5), JPutzeys (5), jtfalkner (5), judyglambdin (5), Juhyun (5), juliahogan (5), julienbellis (5), junha2353 (5), jurrehart (5), jvg977 (5), jvr\_alex (5), k8107 (5), kadromerve (5), kafaye (5), kamchatka (5), KandaharAlwaysGreat (5), kandicewong (5), kapear (5), karenim30 (5), karimdiatoubajie (5), karliu (5), kastel (5), kateo1918 (5), katvan (5), kaytdek (5), kazemichi (5), kbcbeta (5), kbh2595750 (5), kcpssp220 (5), kcyoun689 (5), kelleh (5), kellie.ramsdale (5), kellybac (5), Kelogs (5), kevin05 (5), kgalipeau (5), khazan (5), khorjus (5), kidvskatfan (5), Kikki (5), kim1531 (5), kimty5472 (5), kimunbang (5), kingbrunies (5), kipmacsaigoren (5), kitarity (5), kittysu (5), kiwidaffodil19 (5), kjh040 (5), kjia (5), kkmiover (5), kks1804 (5), kku1001 (5), kkw9809 (5), kkwon0627 (5), klara (5), Klink74 (5), kmg123 (5), knittygritty (5), koenvl (5), kojang07 (5), kongyantung (5), konoe.coco (5), konstan\_ka (5), Koryus (5), KorZone (5), kou2004 (5), kpres (5), kratosreven (5), Krickett (5), krisa8 (5), krodelin (5), krostybat (5), krum4063 (5), ksobel (5), Kuhnel81 (5), Kurifu (5), kurt1166 (5), kurtis (5), Kvoltage (5), kwongtn (5), kwonjour (5), lacheles (5), LadySD (5), lamemane (5), Lancejilbert (5), Landwookie (5), Lastik (5), lasting (5), lauras (5), LauraTGar (5),

Laureny35 (5), lazelle (5), Ibergeron2 (5), Idarochabarrros (5), Idcsvdwl (5), leadha (5), leandrovelloso (5), leedscastle22 (5), leeshabh (5), leesm1592 (5), lehollander (5), LeighJayne (5), lemish (5), lenaholm (5), Lethz (5), letturtle (5), lexamo (5), lexerton (5), Lexter74 (5), Ifulton (5), lhw219 (5), libbylee (5), Licorne (5), lilaliv (5), lillianchia (5), Lin (5), lindsayforgette (5), link773 (5), littelbro14 (5), LizardT (5), lizphariss (5), lizsaidso (5), lizzle (5), llx (5), lmillroy (5), lmsympson (5), lmw5736 (5), lobello (5), lobomesa (5), lofties32 (5), lolhai (5), lolokusko (5), lordsarek (5), loripig (5), lorriedjn (5), lovehillary (5), lovelyllis (5), Isarsozo (5), lsb667 (5), Lt.Kettch (5), lucasdwi (5), lucia\_r (5), luciferous (5), lucileinp (5), lufthansa (5), lughead (5), Luk3 (5), lukasabc123abc (5), luko141 (5), luluandstrew (5), Lunaria (5), lupinius (5), lustigbr (5), LV1234 (5), m\_fair1 (5), macgaynor (5), mackinzie\_13 (5), macknoodle06 (5), macrintr (5), madrawn (5), Maegro (5), MagicVince (5), maije (5), maja.johansson (5), maklam (5), malex (5), malspaugh (5), manuel.freire (5), manuel114 (5), Manuelajp (5), marchione (5), marcomaga (5), marcovic (5), mares (5), marianne81 (5), marietta95 (5), marknu (5), marktsoper (5), maronost (5), marta71 (5), martinlajda (5), Marysia98 (5), mas49 (5), Mashflm (5), maskoph (5), MastaDon (5), MasterGuroux (5), Matador87 (5), matcafe (5), MATH\_PL (5), math112358 (5), mattateye (5), mattstebbing1 (5), maverickmusikk (5), max\_nodgnoc (5), maxac (5), mbevans (5), mbruce (5), mcanario (5), McAusland (5), McDeadd (5), mcr103 (5), mcscootty (5), mcwalter12 (5), mcwhite (5), measty (5), MechaFlyer (5), meel582 (5), megang81 (5), mekulick (5), melissangu (5), melkey (5), merilih (5), mgriffe (5), mi2nami (5), Mi3012 (5), miaimarshall (5), michbulger (5), mightymouerr (5), Mikson (5), milts (5), minnis (5), miremos (5), misaacson01 (5), misgurnus (5), mishal\_sayed (5), mistyfriday (5), mitko (5), mleibowitz97 (5), mmb237 (5), mmpkopp (5), mmrx (5), mogela (5), mojk (5), Monchii (5), moncapt (5), moonino (5), Mora914 (5), MotitaMonique (5), mpaucol (5), mr451 (5), mradogna (5), MrEpicme101 (5), mrspruet (5), mrUwa (5), mtimoma (5), mtmoney (5), mtsweetone (5), muhoweb (5), mullinstmichael (5), musiqueen411 (5), muskettp (5), musterabc (5), Mustice (5), mwilliams2 (5), MXGHARRYLIU (5), mychan825 (5), mythique (5), nabi73 (5), nacfire71 (5), nadia6486 (5), naleen (5), narayanankrish (5), Natasha3 (5), natorm82 (5), negatree (5), negocki (5), neobraha (5), neoquilava (5), nergis (5), nervemania (5), Neurocross (5), neurula (5), Nevros (5), Nezenlair (5), niabride (5), NicoletteCastro (5), nicschell (5), nightrox (5), nika93 (5), nikkiness (5), nikko (5), Nilfae (5), Nimauron (5), ninja\_dogyz (5), nisto (5), Nita657 (5), njn (5), NLucius (5), nnunley (5), nommie (5), NoncreditPoem2 (5), nousnio (5), nox3971 (5), Nox-Invictus (5), NVxWILDCATx12 (5), Nyru (5), ocean\_melody (5), octavian\_ny (5), oddny (5), odran (5), og1764 (5), ogprodata (5), ohjeawoo98 (5), Ohreally (5), ojaswi (5), OK2192223 (5), olczi (5), oldgeeser (5), oldmanwinter (5), olioli442 (5), olkit (5), omenfg (5), onecrazysim (5), oneski (5), orcaops (5), orelinde (5), origilalala (5), Ormada (5), Otolino (5), outlawpoet (5), ovo\_min (5), oxygen000 (5), padobit (5), paganhobbit (5), pakap (5), palameta (5), Paleatus (5), pane18 (5), PanosPsy (5), pantle (5), Pat369 (5), paviusa (5), pbkenyon1 (5), pbrennan (5), pchipkin (5), pdpicard (5), pedestrian (5), penCat73 (5), pepito00 (5), perrycat (5), pestrijo (5), Phosphorus (5), phylogenesis (5), Pianist\_6661 (5), pierrelam (5), pierresolide (5), pikmin747 (5), pime (5), pingul (5), pinkie (5), Plazmaz (5), pmind (5), pms2718 (5), pocker106 (5), pointhigh (5), poktintang (5), politvs (5), polyester (5), ponorka (5), porkhammer69 (5), portalbob340 (5), ppjkyfsdf (5), pralina (5), prerna (5), pretera (5), ProfDrCicc (5), profsnape (5), ProfX (5), properplay (5), Pspk (5), psutify (5), psychopath (5), Psyke72 (5), purkinje112 (5), Pyrothrower (5), pys718 (5), qrendel (5), qreon (5), quantumcross (5), Quetzalcoatl (5), Quijotte (5), quintiock (5), rachelhall (5), rachelnm (5), rachliny (5), radhikaj (5), rafaelmelo (5), rafinha (5), ragmedia (5), rainbowdash (5), Raindrop (5), ramswam (5), RandR0805 (5), RapidMount (5), ras009 (5), Ray1989 (5), razull1 (5), rcdemski (5), rcorredorj (5), realtwister (5), rebecca\_hirsch (5), Recons (5), redffm (5), redheadbros (5), RedstoneB (5), RefrusKrad (5), regent37 (5), reinicorn (5), reneeip (5), renrig (5), reubenbreeden (5), revmaillet (5), rexyuan (5), rfink (5), rgitt (5), rgnicoll (5), rharagan (5), rhiju (5), rhqhf614 (5), richo8000 (5), river1039 (5), rjh5450 (5), rlaud99102 (5), rlawodn131 (5), RLShark (5), Rnnavarr (5), mrboss (5), robb (5), robertw104 (5), Roddym (5), rohan100jain (5), romance08 (5), romen22 (5), roon (5), rosetyler0209 (5), RossBeard91 (5), rowosu (5), rowsdower02games (5), royfultun (5), rpounds (5), rube12456 (5), RudaPL (5), RuiCosta (5), Ruppi (5), RuthlessAdam (5), ryno.godfrey (5), SABUK (5), Salt. (5), Sam\_v (5), samforwardtll (5), samix (5), Samnier (5), samuelis (5), sanah1944 (5), Sanne28978 (5), saramuyo (5), saskiaradke (5), saue (5), sc2imm0rtal (5), scampbel72 (5), scarau13 (5), scaseycaldwell (5), Schools salad (5), scp (5), sdhktlsgkh (5), Sein (5), Seren (5), Sereu (5), SerraAngel3 (5), sfinnny227 (5), shadowblade147 (5), shahin (5), shcsleuth21 (5), Sheenah (5), shelly (5), shemf1004 (5), sherdim (5), SHERlocked7 (5), shin90 (5), shobhitjain26 (5), shonomercy (5), shorvat1 (5), shree (5), Shyona (5), siewfai.hoy (5), Silixtu (5), simonsays12 (5), simplyfelix (5), sindms263 (5), sinrh0816 (5), SirRichardTheFirst (5), sirryansilva (5), sirus20x6 (5), SisaX (5), sjcsftommy (5), sjinmo (5), sksmscsjwo24 (5), skstmdvlf (5), skycity (5), slaughterhouse (5), slender (5), slicermd (5), SlothfullyNimble (5), smcandre (5), smh6130

(5), smith127 (5), smunoz (5), snapper\_new (5), snangleplax (5), SneakySnake04 (5), snfl2797 (5), snoogieandruff (5), SolarPolarMan (5), SoleilGarcia (5), SolitaryWalker (5), Solter99 (5), sonisantos928 (5), sonofkingu (5), sonpzi (5), soo3533 (5), soundlake (5), soyo (5), Space\_Lobster (5), spcorrea (5), spetro (5), spfb4666 (5), sponsen (5), squeakycellist (5), ssoh1018 (5), ssocls (5), sspp (5), ssv (5), sswert (5), starlightdust (5), staroflake (5), Ste1408 (5), stefanernst55 (5), StellaRuthSchick (5), stephen\_weber (5), steposka (5), Steppenwolf92 (5), stockwelle (5), stonefunk (5), stouygb (5), subway2020 (5), Sunguraa (5), sungyc2002 (5), sunnylai213 (5), Supedgar (5), superbelt (5), Supertechie2010 (5), sururuk (5), susannabenn (5), sutomuhanma (5), sweeney.connor (5), sweetcheesecow (5), sweetu (5), swirv (5), swukoson (5), syieolr11 (5), Sykes (5), sylverone (5), sylvies (5), synaps (5), Sythas (5), syusra (5), t3amfl4sh (5), tadej (5), taemen0927 (5), Taitatech (5), TaliaF (5), tamoss (5), tankengine (5), tannhauser (5), Taty (5), tbladgett (5), tcarasella (5), tdynka (5), technix (5), tendimensions (5), tengtaott (5), teodoreczek (5), tezench (5), thatshortkid (5), The\_Furox (5), thedcontinuum (5), theender (5), Theeyeglass (5), theging123 (5), TheLaughingMan93 (5), thelle (5), theneurotist (5), TheOtherGuy (5), thephantomracoon (5), therainytype (5), theresa.329 (5), theswede (5), thib (5), Thijs (5), thomashigginson (5), threefoldKarma (5), thtmai (5), thusqed (5), tidolk33 (5), tieni (5), timnorman83 (5), timowu (5), TimseineLps (5), tlin77 (5), tmostien (5), tokarev (5), tokiwang (5), tom4681 (5), tomeke (5), tomm8132 (5), toshihan (5), ToshihikoInoue (5), ToxicWolf1132 (5), transiit (5), trather (5), treegecko (5), trevorn (5), trimaleru (5), tristan62 (5), tristanmagee (5), troythediver (5), trynthink (5), trystian (5), tt777 (5), ttvaaja (5), tuned (5), Tusca (5), tvladeck (5), tw2000 (5), Twarx (5), tyghgtrgtg (5), tylercarter24 (5), tyunth (5), Ukmasmu (5), umikocharlie (5), umk\_noc (5), Undeadgurl85 (5), undefined (5), Uniduni3 (5), Urasil (5), urbaser (5), uriel (5), user123456 (5), usmanshaikh (5), vahrushev (5), vaibek (5), Varazzeno (5), Vasho7 (5), vebrateur (5), vellum (5), venkat (5), venus (5), VestaX (5), Victory1 (5), vigor87 (5), Vigrant (5), Vile (5), Vimanauno (5), VinceGarcia (5), vituperare (5), voluptatem (5), vonempe (5), vpanda (5), vplatonova (5), vsams14 (5), w3eds (5), waddie96 (5), Waffle1 (5), WahnJohn (5), wakimiko (5), waleedfawwaz (5), wamangorfer (5), watergirl (5), watermelon23 (5), wazawoo (5), wbalthrop (5), webone (5), wecker (5), wendymccann (5), wgyurgyik (5), WhamBam (5), whatnot (5), whdfhr0306 (5), Wheatley\_9999 (5), whipping\_star (5), whooshby (5), wierzu (5), wilyt (5), wilson0624000 (5), windstorm9 (5), winnyphuh (5), wjalexander (5), wjddls921 (5), wsgns3940 (5), wnsghd1004 (5), woh101 (5), wojti (5), worrack (5), wq133 (5), wranslem (5), wrathofmobius (5), wrednykaktus (5), WRonX (5), wucza (5), wyatt.wwg (5), Xanthus (5), xDrawks (5), Xeno (5), Xenon\_EX (5), xlxsch (5), xunaoo (5), y9ho (5), yaktown04 (5), yaoxin921 (5), yd2177021 (5), yejin5240 (5), yem0331 (5), Yenriac (5), yesitsjess (5), yh02 (5), yhw1400 (5), yibyag (5), yjessica (5), Yogagirl (5), yoons1102 (5), youngeunjo (5), youngji (5), youngsna (5), yourmind1004 (5), yra99 (5), ytkim (5), yukileli (5), yushmaster123 (5), zac0214 (5), Zaniya (5), zaqwedx (5), Zaxxon5 (5), zennzenn (5), zest0808 (5), Zhaan (5), zhangyushou (5), zhiar10 (5), ziggystar (5), Zinho (5), Zion (5), zkfmtldpf (5), zmajchek (5), zvernier (5), zzing\_yo (5), zzzoe (5), 0 (4), 0407jm (4), Oto (4), 1030550812 (4), 1095414564 (4), 123654 (4), 163264 (4), 1846ss (4), 1nfinity (4), 2l0l555 (4), 53N713NC3 (4), a404 (4), aan1234 (4), AaronTovo (4), abbybauk (4), abelgar (4), Absolutelypolly (4), abunazih (4), acbastin (4), achutegui (4), acrobeles (4), actor317 (4), adamyth (4), aden20 (4), adf6557 (4), adokymos (4), adol16 (4), aektan (4), aepasto (4), Aerothermal (4), afasoli (4), agr\_05 (4), agregoryx (4), agrimison (4), aislyn (4), ajffja (4), AkaneLee (4), AKayl33n (4), aksen308 (4), akumazer0 (4), alanpk25 (4), albin (4), alejandroc (4), aleli95 (4), alevineman (4), alex6614 (4), alexartak (4), ali8ci (4), alicat2683 (4), alienn (4), aligator\_xxx (4), Alike (4), alindley (4), alineweber (4), alishameharali (4), aljen (4), almankiz (4), alordex (4), aloshin (4), Alphaprime (4), alphaq (4), alr018 (4), alsandler (4), AlTezer (4), alvasvoboda (4), alvin (4), alyssarene1313 (4), amandaf (4), amchagas (4), amconner (4), AmitM (4), aml.pl (4), amnichitean91 (4), AMtreat (4), ana.e.gabriel (4), anakobaian (4), anastasia.mv (4), Anbando (4), andonieck (4), andranar (4), andreacastelo (4), andreas121 (4), andreip0pa (4), andrejkelemen (4), andrewfms (4), andrikins (4), AndySch (4), andythai (4), angryst0rm (4), anjalidarji (4), Anmlmonk (4), annaj (4), AnnaMart (4), anncliff (4), Annesmail2 (4), annetama (4), anoctua (4), Antchuck1 (4), antiquechrono (4), antoshka (4), AoT\_Annie (4), applewood (4), aquaism (4), Aquelam (4), Ar1ur0 (4), aragorn238 (4), aramawesome23 (4), archer2665 (4), ardard (4), arikitarukido (4), Ariostho (4), arthurdent (4), arvamircea (4), Asaliah (4), asanorin (4), ascale (4), Asdam (4), aselinaz (4), ashibear117 (4), ASiklov (4), ask (4), aspid61 (4), Assassin\_Death (4), asterias (4), Astroploukos (4), Atombox\_Scout (4), attemptingreason (4), awerawer (4), awolter (4), azyr3 (4), b52592 (4), bacon\_bacon (4), baddogroberto (4), bajohnfeye (4), bakurahead (4), balonsodc (4), Banana0042 (4), bang220 (4), baos72 (4), barbie (4), bartek666666 (4), Bartekkk (4), Bassti (4), batkuip (4), bcarbone (4), bean3264 (4), beargrylls2 (4), beau (4), bend87 (4), bengalan65 (4), benglitz (4), benitobertoli (4), benjamin.t.sutton (4), BENSONATOR (4), bestpsh (4), betho\_g (4), bfarill (4), Bfletch (4), bfrey003 (4), Bhinman (4), bigrich98 (4), bigwell (4), Bila1x (4),

bilalt10 (4), bine (4), birddad (4), bitti06 (4), Bjust (4), blackcop117 (4), Blackhawx132 (4), bliborio (4), blooper (4), Blossom (4), blubi (4), blue legacy (4), bluedragon108 (4), bluemuppet (4), BlueWaterV3 (4), bmast (4), BobbyBrown (4), boilpoil (4), bolliholic (4), bond007 (4), boskoyevsky (4), bossalinie (4), bradley395 (4), brahman56 (4), brahn (4), braindon7 (4), brandon13 (4), brayn (4), breadval (4), brenn6048 (4), brijlund33 (4), brock2633 (4), browncats (4), brrda (4), Bruce.Whitehead.45 (4), btvdan (4), bujhm (4), Bulletsack (4), bullyballa (4), Buralking (4), burlynate (4), c.s.l\_ (4), c331768 (4), Caeruleaf (4), cahsaysdoom (4), cai3 (4), callum (4), calpkw (4), camwaggener (4), capicua-man (4), captainbrant (4), capucine (4), carchub (4), cariewinters (4), carlosmarkakis (4), carlpalmer (4), Carmac (4), carrothart (4), casperinroc (4), catesfolly (4), catherineb (4), cazzbee (4), cbh1228 (4), ccheek21 (4), Cdtpascal (4), cebercoto (4), ceesdevrieze (4), ceh0409 (4), cenoch23 (4), ceolee (4), cercaste (4), CGMitch.G (4), cgreen (4), cgross (4), chahn (4), chainthebrain (4), changhee (4), charliez (4), cheesewithmold (4), cheezy219 (4), chelovekbeznika (4), chelsme (4), chemmom (4), ChiaYuanLin (4), chilledparadox (4), ChillyMoe (4), chocolatito (4), chox123 (4), chrisc (4), christine.o (4), chrono200 (4), cihancaglayan (4), Cimone (4), cirque92 (4), citizenscientist (4), clem22150 (4), cleosheather (4), clover141 (4), cmbslp (4), cmcnulty914 (4), cmemberbury (4), cmy9342 (4), cnb24 (4), Cnvc (4), CodeMaker (4), Codey (4), codns1687 (4), colburne (4), coldfiregr (4), colin166 (4), coloredspots (4), comdoctor93 (4), comsamdd (4), coolpower (4), Creeper (4), Croc (4), CrunkWolves (4), crystalkelly23 (4), csanderfod (4), css (4), csullivanmsmtxcom (4), csy06 (4), ctmorton (4), cuadiore (4), cube94 (4), Cubox (4), cuckoopuff85 (4), curious-mind (4), CurlySquare (4), Curlz (4), curry4me (4), Curuar (4), cwilcox17 (4), cyber64 (4), cymozx (4), D.K\_ (4), d0m1n1k (4), d0x (4), daas (4), daffytje (4), DagelijksGamer (4), dagtveit (4), dailyblue (4), DAL (4), Daltond187 (4), Damaya (4), danascheetz (4), dandam (4), dandavecave (4), DanFaraday (4), danielcb (4), danielmmiranda (4), danin-jakitten (4), dannam215 (4), danny0825 (4), dapplesprinkles (4), darbywalker (4), daria123 (4), darja (4), dark0re (4), DarkCD (4), darknimotaa (4), Darth\_Roacho (4), dave245 (4), david3684 (4), davidar (4), daviz1992 (4), Daworox (4), daxlerod (4), dazy (4), dbot67 (4), dbwhddn1234 (4), ddrummond15 (4), ddugger (4), ddung0719 (4), Dean5432 (4), Deante0 (4), Decalisse (4), default\_ (4), delp (4), demars (4), derborgus3333 (4), Dereckedum (4), derry (4), dewy1314 (4), dfcv2014 (4), dgdg (4), dhcruiser (4), dhirson (4), dhouseholder (4), DiEvA12 (4), dim (4), dinw (4), ditzily (4), djg20 (4), dlehdud358 (4), dlrrn45 (4), dman7nyc (4), dMcLean711 (4), dmltk08 (4), dmswls1733 (4), docham (4), doesnofollow (4), Dogbearmoo (4), dogie (4), dogiefrank (4), DonnaReynolds (4), donvitorio (4), doomblades (4), dotgae (4), doubleujay (4), Dougie454 (4), dracnah (4), dragonboy440 (4), dragonsongallifrey (4), drakethewriter69 (4), Drazha (4), drmoAstate (4), DRNCK (4), dron\_chic969 (4), dubism (4), dudwls9383 (4), DulceIMT (4), duppy84 (4), durdedur (4), DustyStyx (4), duw001 (4), dvdsackey (4), dwleamy (4), dwlee (4), dzezi (4), Dzickens (4), eap-wianno (4), earthtomurph (4), Ebb (4), edk (4), egorauto (4), ehdgnl07411 (4), eihf (4), ekthal0217 (4), elaine1 (4), electricmonk9 (4), Elenitz (4), eli7224 (4), Eliska (4), eliza93 (4), ellinor (4), ellohell (4), elmokillyou99 (4), elsewein (4), elvin04 (4), emarrosu (4), emccrory (4), emeryw (4), Emet (4), emmeline (4), emontoya (4), emoschowits (4), emw9004 (4), ENDRJUPL (4), Enedu (4), eneje (4), enigma (4), entropy23 (4), EntropyManor (4), Envielox (4), epastor (4), episeph (4), eranion (4), erickxbox (4), erikangamarca (4), ervah (4), erzic487 (4), esing (4), eukaable (4), Eukrit (4), Eula (4), evalencia (4), Evka (4), ExCluSiv3 (4), exe942 (4), exelarate (4), exitmould (4), eyewire1999 (4), Eyewire99 (4), eyewireguy (4), eyewireorg (4), fabiogammer (4), FallenCherub (4), fandaal (4), Fanny (4), Faranight (4), fasdap (4), FastMHz (4), FastTurtles410 (4), fehtemam (4), felipecm (4), Femex (4), FenrirHUN (4), ferrari345 (4), ferris16 (4), Ficholas (4), FionaShuttleworth1 (4), firstcrane42 (4), Fishwolf (4), flaff (4), Flamco (4), fldutch-man (4), flouf91 (4), fluck (4), foggy (4), fogichan (4), forefinger (4), Fouriera (4), foxie (4), franciszhuo (4), fredall (4), frenchthellama (4), frite (4), frog0904 (4), frozik (4), frumpusdumpus (4), fszalay (4), fuzer (4), gabemungus (4), gabrielakownacka (4), gabriele84 (4), gado (4), gamers2000 (4), gaomrx (4), Gavin.james (4), Gaztelumendi (4), Gebus (4), gedgold (4), Geney97 (4), ggawel (4), ggil (4), ghahs18 (4), GhostSoldierornick (4), gih\_sabadim (4), Gio14vanni (4), gitchiest (4), gjosephina (4), glasiu (4), Glider\_Flik (4), glittergasp (4), gnomjin (4), GOA\_FFa (4), gokcezeynep (4), GoldyHair (4), golozgopik (4), golstar (4), gonzalespacito (4), goofnaggle (4), gori625 (4), gos22 (4), goust37 (4), Grace\_Alexandra (4), gramcracker007 (4), GRat (4), graymatter\_ (4), gregnel (4), gregschoeninger (4), grimeywimey (4), grizzlyd530 (4), groma (4), Gryfita (4), guillaug (4), guitarh325 (4), guitarmandan (4), gustavo-ferreira (4), gutmech (4), gutom2 (4), gynger888 (4), gyqls511 (4), hahnhell (4), hakuri (4), Halcy0n (4), HalfDream (4), HamsterBoo (4), hancampbell (4), hannahckm (4), hanzer (4), happysea (4), hardgrovius (4), harkrade (4), hasacz (4), Havok (4), Hazm (4), hboo (4), hc2747 (4), hcoll6774 (4), hd979 (4), HeatherJames (4), Heidiy (4), helen827 (4), helloall (4), hellseher (4), heneph (4), heobim10 (4), heorina (4), herbstzeitlose (4), hi99007 (4), hliem001 (4), hmartin2121 (4), hobophobe (4), hojin0331 (4), Hokepoke (4), hollowo (4), Holyshrine (4), honolulu2 (4), HonzaCZ

(4), hoonlee0627 (4), horacionomade (4), host987 (4), howlowck (4), hplaserjet (4), HROXANNE (4), hs1308287 (4), hseoyeong (4), Hsiang (4), hsk22000 (4), hsnopi (4), hss424 (4), hufe1983 (4), Hugo154 (4), HunterLikesDong (4), hweller (4), HyojaeSung (4), hyuoh (4), iain (4), Iamhelpingscientists (4), Icariolux (4), icekrs25 (4), idunregine (4), iggyfenton (4), igodsman (4), ihatebomb (4), ikta (4), ilke444 (4), ilkka (4), illahmae (4), Illusionx (4), imdy1028 (4), Imhoden (4), inayl (4), incaunc (4), inchoate (4), indielips (4), inhage (4), INPEN (4), inpsyght1879 (4), internetbird (4), iridescentshockwave (4), is2dive4 (4), istanbul (4), itspecial (4), ivanorus (4), j\_mcn23 (4), jadesonchen (4), Jadwiga (4), jaedole123 (4), jagod92 (4), jaime0815 (4), jaisonomoto (4), jake0121 (4), JamesFrancosdfsadf (4), jamesvbo (4), JAMtnz (4), jandyn (4), Janina (4), jannettaD (4), jared67847 (4), jasfar (4), jason\_wurzel (4), javie97 (4), jawboneblues (4), jaxblazer (4), jaxxxccc (4), jaznowski (4), jazzyjans (4), jcran61 (4), jcv24 (4), jdj0305 (4), jdmarks (4), jeffsabine (4), jennadocher (4), jenniferforester (4), jennrh64 (4), jensu (4), jeon\_seong\_woo (4), JeremyJots (4), jerouth (4), Jerseeyyy (4), jessiej (4), jflds3000 (4), jfreeman81 (4), jfuller4 (4), jhgood1209 (4), Jiax1999 (4), jihyelea (4), jimmyramm (4), jimtoth44 (4), jinwoogim (4), jiseung (4), jisunwreh (4), jkim992002 (4), jjreed (4), jjs1523 (4), jkafka (4), jlyman (4), jmhbot (4), jmskm101 (4), jner93 (4), jo\_do (4), jochennierfrau (4), Joebobrj7 (4), Joero (4), jofloirl (4), jogilvy (4), jogos (4), johanlt (4), johnnyb (4), jonatron\_beta (4), jongcong\_ (4), JonMacLeod (4), jonpenn1 (4), joravasal (4), josephmartinez (4), joshwash (4), jotschaena (4), joy0530 (4), jplaw0 (4), jpaterer (4), jse803 (4), jshsh7553 (4), jszopi (4), jth0809 (4), juchem69z (4), juhwikim89 (4), juliaarthur (4), julianna (4), julie14 (4), julio (4), jumbo2015 (4), June6197 (4), jungarm03 (4), jupdy2 (4), justtotest (4), juzari (4), jvb123 (4), jweagley (4), jyen0015 (4), k\_nammi (4), k\_screws (4), kaacarroll (4), Kaaten (4), kabopple (4), kah\_anne (4), kaila.r.stein (4), kaisyu (4), kakineteitoku (4), kalking0 (4), karanara (4), karent (4), karlaguate (4), karlthom55 (4), karo (4), karolis\_mochitas (4), karos (4), Karpikala (4), karystxr (4), Kasejin (4), kassiajoy (4), katdill (4), katealeen (4), katejohnson76 (4), kathrynn12234 (4), katiemt5814 (4), kavalpatel23 (4), Kawzeg (4), kaylabuck (4), kaylawardle (4), kayshum (4), kaze117 (4), Kb3ayo (4), kbj933812 (4), kdy000622 (4), kef274 (4), keinekatze (4), KellsBells (4), kellytice (4), kellz (4), Kerenabal (4), kfuller (4), kgo81 (4), Khadija (4), kidblondie (4), kiefr (4), killface\_9 (4), kimbbaker (4), KimBK (4), Kimjina (4), kimsea2229 (4), kimtw731 (4), kimyh5932 (4), Kincaid (4), kinleymj (4), Kinshuk (4), Kinyajuu (4), kiphart91 (4), kipnotize (4), kiteri76 (4), kito731 (4), kjh33006704 (4), kjhkjh0929 (4), kjlee1472 (4), kkorshak (4), KlaudiaJ (4), kllinas (4), kmalhotra2019 (4), kmj0526 (4), kmkuzel (4), kmw8172 (4), kojungtang (4), kolidazila (4), koowalczyk (4), korman7750 (4), Kos (4), Koziol (4), krejpsky (4), krismarburn (4), Krullen (4), krun1020 (4), kshaw (4), ksjun2269 (4), ktabonilla (4), KThxBai (4), kubi9 (4), kurik.martin (4), kurtb (4), kurt4 (4), kurtt (4), kuyoungc (4), kwydjbo (4), kxward (4), ky990911 (4), kylefish (4), kylin7702 (4), kyrawsome (4), kzornado2019 (4), l0gan (4), lafrio (4), lakeduffy (4), lamane (4), langee (4), lannoy (4), Lanundso (4), LaraMc (4), larriaga (4), larserik (4), larsnh (4), laura\_martinezf (4), laurav (4), laurenend (4), lctheny (4), ldcskaa (4), LeastResistance (4), ledliewc (4), leecs1019 (4), leecy1989 (4), leedlgksw (4), leedyd (4), legendch (4), legiondracul (4), lelya8033 (4), lendluke (4), leonyin (4), lepapuu (4), lflee (4), lhj0923 (4), librariana07 (4), liesjestein (4), lighto (4), lilhuck43 (4), lilitber (4), limsukwon (4), liqingya414 (4), lisbethvc (4), Little\_Pip (4), Littlenine (4), liver539 (4), LizWiz (4), LJW (4), llamaschool (4), llkling03 (4), LMS (4), logsdonja (4), lohaim (4), LoisR (4), Lollipoplaura (4), longbow (4), lopezg (4), loutcho (4), loveisbuie (4), lozer232 (4), lpkjh6027 (4), lu (4), luciel0423 (4), lucifer86 (4), lucky3577 (4), luisa\_ (4), luisarivera (4), Lukcio (4), luminessa (4), lunap (4), luos543 (4), lutherville (4), lynnha0 (4), m.maughan64 (4), macc1995 (4), maderwin (4), madmicha (4), maggie8 (4), mail\_inator (4), Majka (4), Malisius (4), maly.spooky (4), mandm (4), manny2510 (4), Manopix (4), marcelakatz (4), marcelcr92 (4), mariagaa (4), mariam360 (4), marianaaraujo (4), marianavc (4), MarkTaylor (4), Marventrian (4), mashycm (4), matcru (4), mathijs.raeven (4), Mattata (4), mattf617 (4), matzelinho (4), maximumprofugo (4), mayli1 (4), mbabg (4), mbergman000 (4), mdemailard (4), mdvsk (4), me7336 (4), mecraft5 (4), Meeeee (4), MegaPumpkinGuy (4), melon4644 (4), menlo493 (4), meonah (4), Mercedes1 (4), miarosa (4), michaelanderson177 (4), MichaelS (4), Michelangelol (4), michomichoftw (4), michpsych (4), mickaelfive (4), mightmatt15 (4), migs1488 (4), Mike13 (4), mikolajm (4), mindbender2 (4), mindcracker (4), mindlayr (4), minfante728 (4), Minichica (4), MiniElli (4), minikie (4), minollo (4), mintveri (4), mirkomieze (4), missc (4), misterfive (4), mistermancini (4), misterpriscilla (4), misty25 (4), mithila.tople (4), mjk (4), mmk303 (4), mobrien\_88 (4), MofroShow (4), moirasanna (4), mollydmc (4), mollyelliott (4), momo12212 (4), momomo321 (4), momoppi (4), Mongolasse (4), monkeyme123 (4), montakan (4), morriss (4), mosnar (4), mr\_tangy (4), mRagen (4), mrd441 (4), mrdance62 (4), MRE293 (4), MrGrillo06 (4), mrhulick (4), mrjerrio (4), mrjmoghadam (4), mrjrgregory (4), mromines (4), mrpo (4), mrskyman (4), mrvilq (4), msgarcia (4), msilvestro (4), mtillema (4), mtraskos (4), mulees (4), mullet (4), mun5mun4 (4), munteangabi (4), mup\_ing (4), murattosunph (4), Murdoch37



(4), mures (4), mwdepaolo (4), mweerdmeester (4), mycosinth (4), myhappyroom1 (4), mys (4), mysterypigman (4), Mystiko (4), n3urofold3r (4), Nadav (4), nadbog (4), nafgerot (4), Nakovalny (4), nalic99 (4), nami1004 (4), NanFuLiou (4), napa120 (4), NathanHarris1515 (4), NathanJ (4), nati96rox (4), Nazutin (4), ncutting (4), ndm02002 (4), Neb7 (4), neffkl (4), negradeveracruz (4), nematostella (4), nemerle (4), neonhamster (4), neurobob (4), neurodub (4), Neuroscience2015 (4), newsecret (4), nextme\_ (4), nhaggerty (4), nheung (4), Nick13579 (4), nick55813 (4), nickyh (4), nicno90 (4), nienietoperz (4), night92 (4), nijinsky (4), nikhilajain (4), NIKIDZ (4), nikisara98 (4), nilay (4), nimi (4), nina221 (4), nini (4), ninjadiver (4), niqua (4), nirbhayaprabhas (4), Niscita (4), nismith8 (4), nitrojin (4), nnnnnnnn (4), nonok13 (4), nosam555 (4), notadolphiniq (4), notaryatyourdoor (4), NotLarry (4), nova1000 (4), noxmagus (4), nrjabri (4), nschwehr (4), null (4), nunodematos (4), nurse\_dan (4), nyefan (4), nykkii (4), O (4), Oeufcoque (4), ojoy0222 (4), OleksiyNosov (4), oliveruv (4), olivia26249 (4), omgomg123 (4), omicrom (4), onexused (4), Onotole (4), ooshoo (4), Oppenheimer (4), opthal (4), orbitalvelocity (4), orephelious (4), owleg (4), P0yzin (4), pacificcod (4), pad9 (4), padmameow (4), PainX (4), pandamanium (4), pantor (4), Papa\_Luigi (4), Paperchaff (4), paperluigi64 (4), paraplu (4), park10042002 (4), parlsmith (4), parologist (4), patriciadaavid (4), patriciagentile (4), patrick\_steamer (4), patricksil13 (4), Paul\_Di (4), PaulaClay4 (4), Paulaech (4), paynen (4), pcarnlr (4), pellari (4), perrson (4), peterdoe (4), Petulkqo (4), phaedrush (4), PHILIPPINES (4), philmag1 (4), Phlomis (4), PhoenixVorcE (4), Phoenixwish (4), phprevot (4), picnus (4), pieguy3\_14 (4), Pietar (4), pilaspex (4), pinia0601 (4), Pinkdolphin (4), piora\_pis (4), pirman12 (4), pirocorp (4), pitter562 (4), pjg914 (4), pjp0704 (4), Plaus (4), playing905 (4), plp855 (4), plutonic (4), plxas6 (4), pm14 (4), po1058 (4), poiwer22 (4), pokadotz03 (4), PolluXX40K (4), pompaii1 (4), pono (4), popof5040 (4), poppyc8 (4), PorcelainPoison (4), PositronicNet (4), PosroaChips (4), pota30 (4), powergo (4), pr1239 (4), priyank (4), psiknight (4), psm2563 (4), Psychedelic (4), Psychotec (4), Psychystal (4), psykhat (4), pszym3 (4), ptsteele (4), puni1 (4), puptitch (4), pyoreng (4), qja3375 (4), qofndlwl (4), qpetry7727 (4), quahkek (4), Quanda14 (4), r0b0guy (4), radman (4), Rafkatar (4), rainmage (4), raktey (4), RALPHNICOLOFF1961 (4), ramongtz (4), randella16 (4), randomguy123 (4), randomletters (4), rasac (4), rashadc (4), Rayan159 (4), rayndrahps (4), rcjsa (4), rcubey (4), rdelaney94 (4), realisticdeity (4), rebekah (4), recessive (4), redfern (4), redrabbit13 (4), RedRoseSpiral (4), reelgenius (4), refaire (4), ReginaSaphier (4), regnoc22 (4), remick (4), reneedowning (4), Rereza (4), restxiphoid (4), Revbuster (4), revcrobins (4), revolver (4), rezmason (4), rfever13 (4), rhctnsu (4), rherhager (4), rhtjrwns33 (4), ricardo\_ja (4), ricardoromero4444 (4), richardaugusto (4), Richtefee (4), RickVigorous (4), rikso (4), RileyC (4), riri109360 (4), ritchiek (4), rjls2809 (4), rkdals04 (4), rlaekdns1101 (4), rlowden (4), rmelzer1986 (4), rmiller18513 (4), rn1003 (4), roastbeef (4), robbie (4), Robosaur (4), rockerboo (4), roger (4), rogershaw (4), Rollercynoc (4), RomanB (4), ronalara (4), rookiemonster (4), roy5782 (4), rstree23 (4), rtclawson (4), Rubiksgocraft (4), ruc (4), rumoe (4), runinggun1 (4), russk (4), RyanFXN (4), ryant (4), ryoroan (4), rzrrzr (4), s.cheng (4), sabamfajo (4), sabamlv (4), sadia (4), saint15 (4), Sakarah (4), saku (4), Salem (4), salezyum (4), samesaar (4), samjm1948 (4), SanctusSusanin (4), sandpile (4), santodomingo (4), Saphira111 (4), sarah.deFrieze (4), Sarah333 (4), SarahWild (4), saramin (4), Saree (4), sargon (4), sarlytheplatypus (4), saself (4), saskiel666 (4), saucyyum (4), sbentley2019 (4), sbloom (4), schansan (4), schauvin (4), scheflo (4), schifani (4), schism (4), schmoller (4), sciencer (4), scifi (4), scotthmccoy (4), scream (4), scrimon (4), sdfasfasdfa (4), sdyb (4), sean247 (4), seanybug (4), seaton78 (4), sebaluks (4), secondree (4), selen (4), senseibonnar (4), Sepiabrown (4), sepionet (4), sepyoukey (4), SeriousMike (4), sfdwashere (4), sfsdd (4), sghdfghdfgh (4), ShadowBeast42 (4), shadowsnexus (4), Shae (4), shaker28 (4), shamau5 (4), shamitbagchi (4), SHAMMAD (4), shane3 (4), sharonk9912 (4), sheeba (4), Shepard\_Rus (4), shinthing (4), showtek (4), Shrinks99 (4), shryggur (4), Siberia (4), simon4u (4), siMplycoMplex1 (4), simrun (4), simsalabim (4), SineadM (4), sinergy1 (4), sinrotulos (4), Sizee (4), skotm0643 (4), skrebushok (4), skwyverns4 (4), skylarhuhnholz (4), slagles (4), slh01slh (4), Slylou123 (4), smart1103 (4), smilerssyndrome (4), smooms121 (4), smrcharids (4), SN1962a (4), snehaprasad (4), snicklefritzz (4), snowbear745 (4), snowyrainn (4), soccerperson8 (4), sockman (4), sohmenlu (4), Solshu (4), Soma1337 (4), Sookim (4), soulfly (4), Soulfull (4), spacebarley (4), Spacer (4), spazzen (4), Spectocular (4), spellfire (4), Spin\_Doctor (4), spinalas (4), spoiltcheese (4), Sproutland (4), SqrllGrrl (4), Sshars (4), sspft9731 (4), Stalkerwar (4), stanimaka (4), starbit (4), starblob (4), stardon8 (4), StarkITA (4), starryjess (4), starshirts (4), steffie9 (4), sterling (4), stevan1986 (4), stillblazin (4), stoicgoof (4), Strobe (4), Stseverin (4), Sturmund\_Drang (4), suna1314 (4), sunghyun2003 (4), sunglim8060 (4), sunroots (4), sunsori (4), superpen (4), suzschnitz (4), swanlake (4), sweeny (4), sweetie (4), swiftcol (4), sympheaceu (4), t1mmy\_turner (4), tabbek (4), taiji (4), tamikaheiden (4), Tapio (4), TasKitas (4), tatianacattand (4), TatianaPestova (4), tay606 (4), TaylorLB (4), taylortiger (4), tbussler (4), tcw\_al (4), teresaf (4), terodil (4), testcom (4), tetsuo86 (4), tgruenwald (4), Thatsciencedude (4), theBadwolf (4),

TheBootsOfWar (4), thedoctor276 (4), theladynull (4), TheMadStork (4), themostprecious (4), Thenosis (4), theone-hipster (4), theperssonbehindyou (4), theraptor (4), theresaken6 (4), therightfulking (4), TherilOttpea (4), thrbn (4), TiagoCosta (4), Tianqi (4), timetrack (4), timshot (4), tinadingsda (4), tine (4), tinkis (4), tissue (4), tizmrkddb (4), tk-lauser (4), tlfps99 (4), tman15tman (4), tmsodano (4), toastybuns (4), tobe (4), tode1126 (4), tomas (4), tomaspour (4), tomidious (4), tomvdz (4), tonolmo (4), tonysong (4), TonyTonyChopper (4), topbeht (4), toyofjoh (4), transonlohk (4), Trekkie359 (4), trende (4), triffy (4), triiiiiiple (4), tryptophan (4), tsolee329 (4), tsuhi319 (4), tt91 (4), ttacox (4), Tuco (4), tue92670 (4), turbo (4), turpentine (4), tvcl5 (4), twinklekid00 (4), tyfoster97 (4), uberubert (4), UCSDavid (4), uct1 (4), ujin (4), ujinnice (4), unden92 (4), underdream (4), unholyxangels (4), unlucky777 (4), upnine1026 (4), UpsetChap (4), urisa12 (4), urstruktur (4), Ursvc (4), urxiel (4), vahuja987 (4), Valee (4), ValisTheBig (4), valorxy7 (4), valravencaeru01 (4), Valried (4), Valz7 (4), vamlu (4), Vampex (4), vaudchespeldt (4), vbailey (4), vegairon (4), Velyger (4), venasaphena (4), venticel (4), vicesig (4), vick22 (4), VijvalN (4), vincebzh (4), vincent.bouttier (4), vinqbator (4), vizceral (4), vjvemula (4), volcarona (4), VoltronTheTurtle (4), volz\_rocksti (4), vremechko (4), vsarode (4), Vtmaid (4), vtpcwizard (4), w2lf (4), w4rh34d (4), wadleyjk (4), waeiss (4), walkermy4 (4), walkiria (4), waltercnunes (4), wardnj (4), warjikin (4), Wasabi (4), waver19 (4), Wayfinder (4), wazap567 (4), Weilacca (4), wernerbatt (4), wfcutler (4), what\_if (4), whdgur1130 (4), whiskersntail (4), whiteshadow (4), whssk1201 (4), whynotscience (4), whysoseriousheh (4), wiilio (4), WillieM96 (4), willyt2000 (4), Wiltify (4), winboy0 (4), winnrocks (4), winstonwschow (4), wireful (4), wirerofbrain (4), wjddk193 (4), wjdehdgud321 (4), wjdrbeks1021 (4), wlvplwkd (4), wmhilton (4), wolfgangouille (4), wolfka (4), wonderland0125 (4), wonsj01 (4), Woosanjangsoo (4), Wopith (4), worud1341 (4), wufasa (4), XariaX (4), xaton (4), xdm1324 (4), xena (4), xenostrigger (4), xeor (4), xiphopagus (4), xnak62x (4), xxp (4), xpxpectedxx (4), xy1718 (4), yaboo (4), yangseungmin (4), ybg (4), ybot (4), yliapis44 (4), ymD (4), yoonjpe (4), yossi (4), youkonsu (4), ys4601 (4), yu3700 (4), YumeNoUta (4), yurik (4), yyj1210 (4), zabazz (4), Zalameda (4), ZalmanKelber (4), zankerh (4), Zathat (4), zed0118 (4), zehkaturra (4), ZeldaSalfati (4), zelenond (4), zelick (4), zergswim (4), Zhopengauer (4), ZieloneMaki (4), ziemni (4), Zlooo (4), zmits (4), zoicneo (4), zomgoap (4), Zurma (4), \_slashcore11 (3), 08wooda (3), 09edwar (3), 0swald (3), 10010250 (3), 101bobbie (3), 1047479340 (3), 1055604798 (3), 107943 (3), 1088504863 (3), 10sj15259 (3), 12341234 (3), 15876 (3), 17kims (3), 1ncogn170 (3), 1theo0 (3), 1xMilanx1 (3), 200537rjsdn (3), 2016nkothari (3), 21shahv (3), 3.141592 (3), 51mattr (3), 52play (3), 7uperMan (3), 99tkkim (3), A.Vas (3), a301v (3), abbykayleigh123 (3), aboulais (3), abp6571 (3), abstrusity (3), Abulurdb (3), acb (3), acorich (3), acworc (3), ada.drobnucka (3), adagro1 (3), Adam.Hruby (3), adamfalluji (3), AddictivePotato (3), adfull (3), adiibanez (3), adiop (3), adrrii (3), aeg225 (3), aelhajjy (3), aemacleod (3), aeseir (3), agarciandia96 (3), AgileFreak (3), agresionpower (3), ahri (3), aidonski (3), Air109 (3), ajstuart3 (3), ajuri (3), akina095 (3), akrish5 (3), aktomjerry (3), akuznetsov (3), Alakazam (3), alamay (3), alansoft (3), alanturing07 (3), alaskasquirrel (3), albertrivero (3), Albertus (3), albikovec (3), albis (3), alclsajdcjddl (3), alecchristiansen (3), alejandro (3), alemanmd (3), alenag24 (3), alex112342 (3), AlexaLeigh (3), Alexander.Huebner (3), alexander34 (3), alexandermarley (3), AlexDRN (3), alexei92 (3), AlexGi (3), AlexisIngram (3), AlexP (3), alextremist (3), alexturner713 (3), alexwestiel (3), alford21 (3), Alhu (3), alice10 (3), alice3619 (3), alicia0504 (3), AlkaVirus (3), alliepie (3), allmandring (3), allstrike (3), alpha3031 (3), Alraune\_Nuadu (3), alsdudtmd (3), alsoyang (3), alswlqja (3), am (3), am998 (3), amarili (3), amay0324 (3), amcope (3), amhed (3), amigdala (3), Amnezja (3), ampersat (3), amphetkid (3), amuro (3), anabella (3), Anamarija94 (3), Anatak (3), AndreaMoon (3), AndreeaHar (3), Andrew158 (3), andrewiamtaylor (3), andypeeps (3), aneeshreddyb7 (3), Angelina724 (3), anka.nie (3), Anka20 (3), Anna77 (3), AnnaBlond (3), annalisach (3), annazilla (3), AnneHe (3), annelies1995 (3), annieb214 (3), anniethebrain (3), Annika83 (3), ansleighmd31 (3), antikodon (3), anyone (3), Aokuro (3), AP6YC (3), apaneto28 (3), apes (3), appwiz (3), araidernomore (3), arbutator (3), arch1986 (3), Ariodante (3), ArjenBrouwer (3), arman\_k86 (3), armithius (3), Arnew (3), Arsnj (3), artie92 (3), arty86 (3), asaybot (3), aseem (3), asfgh (3), asgoriel (3), ashk6510 (3), asm15 (3), asmaakhter (3), asoerens (3), astroden (3), atom12 (3), atomverba (3), Atte (3), aumichael (3), AustinHartford (3), Autoclave (3), avneetranjan (3), aw1231 (3), awarita. (3), awepony (3), awhitem (3), axayacatl (3), ayaori (3), ayrborne (3), Azbosh (3), azelaya (3), b0031006 (3), baban (3), babarella94 (3), BabySlapper (3), BackgroundPony (3), backseatgamer (3), baglamas (3), bahadir (3), Baju (3), Balmark (3), banabada (3), BananaChiu (3), bangwl123 (3), barpoter (3), baruch.ost (3), basilbasil (3), Basile (3), batlady57 (3), bazer (3), bdcarlso (3), BeardenBryce (3), BEarlLifeSci (3), BeatrizGarciaM (3), beauson (3), bebe12345 (3), beckettman (3), bellatrix (3), Ben\_Gallini (3), benachl (3), bencarvalho1 (3), benjyrob (3), benoteri (3), BenSB (3), BeOneTwo (3), beratorc (3), berkay (3), bertthehost (3), bethwodzinski (3), bettinabarta (3), bfdrendel (3), bhall92 (3), BHSU69 (3), bibiko (3), billyt (3), bionast (3), Bitzthamage (3), BlueBoy (3), bjneon

(3), blacglac (3), black4394 (3), blacksalena (3), BlackSummer (3), blactyde (3), blaidlaw (3), blairc (3), blohrman (3), bluebite0508 (3), bluelemon (3), blueseafood2 (3), bluesoso (3), BlueSouth13 (3), bluewind (3), bluninjaneer (3), Bluooo (3), blurgh (3), blwalser (3), bmihaela16 (3), BoaEy (3), boater (3), bobbias (3), bobthefirst (3), bogdan\_bresug (3), boguni (3), bond748 (3), borg (3), Borraman (3), borygo1000 (3), boxofcorn (3), bplol4 (3), brainlearnsbrain (3), brainy123456 (3), Brandon\_Hay (3), branimir550 (3), brc67 (3), BrettLewis (3), briant (3), Bridge (3), britishkid (3), britannica (3), bruceIU (3), Brunobian (3), bs3jm1 (3), btel (3), buddyholly710 (3), Bulkhead2003 (3), burito (3), Buuk (3), bwjstar (3), c.ciprian (3), c0mputer (3), c0ntagious (3), caedes (3), Caelan635 (3), calais (3), callherjoulez (3), Calvete (3), CalvinLee (3), Cam\_44\_Holmes (3), CameronIsSenpai (3), candimaya (3), captain533 (3), carlos9228 (3), carlosaag (3), carmenc1ta (3), carojo (3), carolek (3), caroro (3), carryon62 (3), casey0708 (3), cassiect (3), catayane (3), catman1132000 (3), cbeegle9 (3), cbruce1 (3), cc216411 (3), cccong (3), ccesare (3), ccmmsu (3), ccoats1 (3), CCuetoC (3), cehiggins (3), Celia (3), chabs (3), chan (3), chao (3), charlesancelle (3), charlesb1 (3), charlie\_monkey (3), Chatkovski (3), cheeselover101 (3), chemistasis (3), cheneysan (3), Chessking (3), chgnldud1 (3), chi90 (3), Chiara\_F (3), ChineseHamster (3), Chomp (3), Chris\_Strand (3), chrisdonia (3), Chrisholly (3), chrisjfre (3), ChrisPi (3), chrirha (3), ChristianLagares (3), chrono (3), chuckie7 (3), chumpy (3), chzhffptelqk (3), cindys (3), circuitdok (3), cisvman (3), citizenneuron1 (3), CivicResound (3), cjgiaimo (3), cjhc (3), cklem12 (3), cknucks (3), CKrag (3), ckswns9822 (3), cktjswp1105 (3), ckubber (3), clash (3), claudenator (3), cnic24 (3), cocicat (3), codetheweb (3), CognitiveZebra (3), collinbaileyhealy (3), comargo (3), Comensal (3), confusionlove (3), conniemontana (3), Coralbeth (3), corawillis123 (3), Corvus\_Alendar (3), cosmicdolphins (3), costantinoj (3), Cp353 (3), cprietom (3), CptSasa (3), crash9d9 (3), crats (3), Crayon (3), crazyjane (3), CrazyPuppy02 (3), crazysauer (3), crecente (3), creepahwong (3), cro96 (3), cronix12 (3), cruelcrow (3), cschneider (3), curnsington (3), cvdsong8 (3), cvl4317 (3), cweller (3), cwilsnc (3), cwjacksoniii (3), cyacca (3), cyam (3), cyberpageman (3), cydrakkos (3), CyrilB (3), Cyrile (3), cys8865 (3), cysmitty (3), cyten23 (3), czar20 (3), Czart (3), d3xter (3), d4st (3), dajhifo (3), dakota\_gillispie (3), daledrum (3), dananobles (3), Danaoz (3), Dani.mfa (3), dani96 (3), danielle.wahl (3), danielmchale13 (3), danillo (3), danny91 (3), danwalla (3), daphnelu27 (3), Darias (3), dariuszjot (3), DarthAnten (3), DarthGr33n (3), Daruton (3), Darwel (3), darwin4 (3), dash (3), davers (3), davidcbc (3), davidk (3), davidnl (3), Dawgson (3), dbauditor (3), dbstn817520 (3), ddevil6 (3), deafdan02 (3), debbieg (3), debug200 (3), defense7 (3), dellenk (3), delunar (3), demian.haki (3), Deniss (3), DennisZhang (3), DerekLeet (3), derp518 (3), derpington44 (3), deruch (3), DespairJunkie (3), Devo (3), dhreed (3), diamond7 (3), Diana55 (3), DianaM (3), DianaRod (3), Didi67 (3), Didilasnille (3), die9984 (3), diego.cerulli (3), diegozwolf (3), diogo (3), dip\_trix (3), DJ\_Kirby (3), dje (3), djtee (3), dkfkgkq (3), dkshk1 (3), dlehwjr (3), dlellis (3), dlwnsah04 (3), dm420 (3), dmdkd5136 (3), dmstndmsry (3), dnflrkwhr0602 (3), Dobinoo (3), doc101ha (3), doctorstrange (3), docwalk (3), dodah (3), doge (3), doggone1213 (3), doirbles (3), dominicononata (3), Domminika (3), donclark (3), Dongsoo (3), donnybrook (3), Donohue07 (3), dontremb (3), DoomFrost (3), dor (3), DramaticSloth (3), drarm16 (3), Drewskie (3), DrHydra (3), Drnat (3), dror11111 (3), drypass (3), DryRedFrog (3), ds2vlg (3), dsenette (3), dsf1925 (3), dsteiner26 (3), duhwang (3), duncandesigns (3), dusto (3), e\_p\_ (3), e11e (3), eafriendly (3), earnie (3), echory (3), ecnalyr (3), economaster (3), ecoprada (3), ed75 (3), edeardvoid (3), edelin828 (3), EdithB (3), Edmund1 (3), Edmund37 (3), edwardfung (3), edwingarro (3), edwinhui (3), efires89 (3), efroeh (3), eightpackdude (3), ej112234 (3), elande (3), Eldritch (3), elhen\_02 (3), EliHenry (3), ElijahFromm (3), elinedj (3), ellieshapiro (3), ellslld (3), ElPartey (3), ElZede (3), emilsinbat (3), emily\_haley (3), emily.delagarza (3), Emma.C (3), EmmaBeh (3), EmperoroftheMoon (3), endofstory (3), enionh (3), Enkhiel (3), enobae (3), enrique.glezhdez (3), eogur1016 (3), eojin (3), eojis (3), eozkeskin (3), epiho1212 (3), epmartin (3), eranimo (3), ericafrederick (3), ericanina (3), ericd8 (3), EricKenjiLee (3), ericme (3), erinfaurote (3), Es (3), eschmitzer (3), Esqali (3), esrabyk (3), Eternal\_Howl (3), eternallogic (3), ethangood (3), Etrunon (3), etSr (3), Eugenexc (3), eulinne (3), Euterpe\_Pan (3), evan0680 (3), evgenia (3), evgeniya21 (3), EW\_Sashok (3), eweing (3), Experimentium (3), Explicityx (3), eyalni (3), eyeguy2 (3), eyeseeyou (3), eyraruna (3), ezreal (3), Fabiojc (3), Fabrice (3), fairygodmother (3), Faker (3), FallenandRedeemed (3), farzana (3), fengzhangliu (3), Fess (3), fetsan (3), ficklefrog (3), fiestared (3), FilipKaagaard (3), fineyounglad (3), fismer (3), Flash717 (3), floAr (3), floris233 (3), flyte42 (3), fmp (3), FMS (3), fmw535618 (3), fmvclsh (3), ForeignSilhouette (3), Forever39 (3), forret007 (3), Fortunaire (3), fotal (3), FourwingsY (3), Foxbat40 (3), foxpflueger (3), FrankTheCrank (3), frd0810 (3), fredb (3), freeball155 (3), Frefo (3), frequency109 (3), FreyjaR (3), fripfrip (3), fronio (3), frxstrem (3), frycusthethird (3), fslowly (3), fteam (3), fuchsiagroan (3), fulphiling (3), fuzzy (3), FuzzyWuff (3), fwg\_bear (3), fyodorx (3), g3po (3), gaara87 (3), Gabrielle (3), gaby1204 (3), gabysg (3), Gahzerlake (3), gamerpro3000 (3), Gandog (3), gardenofwine (3), garibaldi.pg (3), GArnus (3), gbautista2019 (3), gclef18 (3), geek

(3), GeekDoge (3), geesteve (3), geizio (3), gektek (3), gelatincube (3), genero (3), Geoeis (3), geologyrocks (3), Georg\_Alexakis (3), gerarddeib (3), german\_y (3), gerrickg (3), gffrtAM (3), gfmdbelieve (3), gfolder (3), gggg4019 (3), ggray10 (3), ggualberto (3), ghds951 (3), ghostwarrior47 (3), giannilorato (3), gihwan2588 (3), gilbertosilva (3), gilbertpenny (3), giovana\_v (3), girl101 (3), Gjcoolone (3), gkfdk1004 (3), gleeko (3), Glenstorm (3), Glint (3), Goa (3), GOA\_MSh (3), godsapple (3), golds413 (3), golion (3), goodasaq (3), Goranismo (3), Gordohalstead (3), Gorpinka (3), gp2000 (3), gp39\_tu85 (3), gracechai (3), grao (3), graymatter (3), greed (3), greengirlkk (3), Greg108 (3), gregab (3), gregger (3), grishfish (3), griteni (3), grizwaldstrip (3), GrowlingTroll7 (3), GStasse (3), gtc3000 (3), GUILLAM (3), GuillermoMichelena (3), GuitarPyro (3), GuruAmar (3), gvn\_nvq (3), Gwendo (3), h4c2s2fo2u2yea (3), Hakjun (3), halliemart (3), hamletta (3), Hamps (3), Hanlia (3), hansheng\_110 (3), happypenguin (3), Haquinai (3), HARiBoKiLLER (3), harleyhillz (3), harperpitt (3), harry\_04 (3), harryp (3), haule (3), haydos619 (3), hdk7220 (3), hdu96461 (3), hecticyryryry (3), HectorHenriquez (3), Helderr (3), helena2808 (3), heniram (3), herbertherlich (3), Hermez (3), heroyi (3), herrshuster (3), hgmnet1988 (3), hibaek123 (3), Higgy25 (3), hilal (3), hirundo (3), hjesp03 (3), hjk3084 (3), hjl040932 (3), hjuinj (3), hkb (3), hklhfong (3), hockeyjoe (3), Holzgraeber (3), honey14 (3), honisphy (3), honu (3), Horizon8 (3), hot93703 (3), houkiboshi01 (3), howeyjon (3), hskorbi (3), Huangzhey (3), HubertCumberdale (3), hudeer (3), hugs (3), hulld2 (3), HumanMRIscanner (3), hunjung612 (3), huntexd (3), hyun840415 (3), i\_foos (3), I\_suck\_at\_being\_poli (3), iamthebatman (3), IanBastiaans (3), iangun (3), ianmceachern (3), ianstyp (3), icecauldron205 (3), iCeOakes (3), ictmagic (3), iheartanatomy (3), ijefflee (3), ikaryndia (3), ilee0990 (3), ilknuryk (3), illmatar (3), illogic (3), imawesome3798 (3), imber012 (3), imperix (3), Impet (3), indieraphael (3), infwinston (3), Ingelin90 (3), ingreth (3), inje0704 (3), Injest (3), InjuringMax (3), inu (3), inuyonggeun (3), inverse (3), IO (3), io2389 (3), ionox0 (3), is83063 (3), isel (3), ishdish (3), its\_samy (3), itsabitsa (3), itsmejx (3), itsnotme (3), ivanh (3), ivof (3), ivonnekyo (3), Ivostoy (3), iyanu15 (3), iyui04 (3), j\_leith (3), jack86 (3), JackChivas (3), jacksplay (3), Jacky250991 (3), jade6679 (3), JaebiSonyons (3), jaha20 (3), jak175 (3), jakdominance (3), JakeTalonscar (3), jalingobi88 (3), jama (3), jamaeusa (3), jamesant (3), jamesb76 (3), Jan (3), janakozicova (3), janapavla (3), jandro11 (3), janets34243 (3), jang1930 (3), jannik\_schrader (3), JanNK (3), japanjeff (3), Jaran (3), Jasmine5 (3), Jasmineho97 (3), jason2228282 (3), jasonwang (3), JAYr (3), jcbenoit (3), jcpearl (3), jcsmith2438 (3), jdw940301 (3), jeacy (3), Jedric (3), jedsid (3), jeffreysnorris (3), jehkyl (3), jelyn38 (3), jemma5 (3), jenny2303 (3), jerkimball (3), jeschutte (3), jessallaire (3), JessicaMariebie (3), jessiegarcilun (3), jgkatz (3), jgtsnc (3), jh3jj (3), Jheguy2 (3), jibbery\_jeff (3), jihojiho03 (3), Jillesdotcom (3), jimchap00 (3), jjhyo1383 (3), jkzmn (3), jjspace (3), jkenyon (3), jlruas (3), jmando (3), jmccance (3), JME (3), jmoore (3), joannabates (3), joescruff (3), Joggurmandr (3), jogi (3), johnny560 (3), JohnnyTz (3), JohnPerkins (3), johnsem (3), JohnsonJ5 (3), jjojjoje (3), Joleen (3), joma001 (3), jon20 (3), jonghklee (3), jonherson (3), jono9876 (3), jonyoull (3), Jooblies (3), joon1821 (3), Joos.eun12 (3), joowon0110 (3), joshperline (3), Josie43 (3), Jotito (3), joyce\_lee (3), JoyJay150 (3), jpl20 (3), Jrcjrc95 (3), jsam (3), jsh8272 (3), jspence (3), jtauber (3), jtclark (3), jtimprou (3), Jtlin (3), judith (3), julie\_jules (3), Julien90 (3), junewon57 (3), junhuk1113 (3), jurajm93 (3), jvillanu1989 (3), jvm8 (3), jyonemoto (3), jzyduck000 (3), k\_gulberg (3), k315michel (3), kaare (3), Kaarebreo (3), kabamaru (3), kaitertot (3), kakiyork (3), kalacia (3), Kaleo (3), kalex80 (3), Kalil (3), kang2602 (3), KaoruIseul (3), karenpulido (3), Karina\_Pistrenko (3), KarinMuller (3), Karol\_D (3), katie5000 (3), katkat67 (3), Katthttak (3), Katybb (3), kayleighvance (3), kdcoffey (3), kdhongtt (3), kdighe (3), kdkhowl (3), keith\_bartlett (3), keldonwarlord (3), kemscm (3), kenfu (3), kenjaminbantor (3), kennroo (3), kentykay (3), KerKer (3), kerkid (3), kevinptg (3), kfcempress (3), kfleit (3), khm2177 (3), kidinluv (3), kihyuk0201 (3), kij (3), Kiku (3), killerdope (3), Kimsebin (3), kingandrew2000 (3), KingFudge (3), kingjiv (3), kingofxbox99 (3), KingTomahawk (3), kinisphere (3), kinkajoe (3), kishibas (3), kjs23461 (3), KJWood (3), kk988 (3), Kleftakos (3), kmitchner (3), knolson (3), kojunseo0 (3), kolegs (3), Kolibri3 (3), kolluruvinod (3), Kondzio (3), kool (3), korucuke (3), kosh29 (3), kpgh711 (3), KR\_VaJil (3), kratos\_ (3), Krelanis (3), krimsoncontactian (3), kristin86 (3), kristoffer (3), krouse31 (3), Krzesimir (3), ks812 (3), ksugregg (3), Kswartz1 (3), kswensen (3), KSwift (3), ktw3038 (3), Kubala (3), kubawajs (3), Kunphuzd (3), kurip (3), kuros2 (3), kw315 (3), kwonhuckjin96 (3), kws7802 (3), kwsheppard (3), kwyoussef (3), kynleed (3), kzappia (3), L.F (3), l2eshock (3), labarrett (3), laestevamfilho (3), lakub (3), lalogiquefloue (3), Lapras (3), laura52 (3), LauraNJ (3), Laurelfroggy (3), LaurenERS2015 (3), LaurenF (3), laybros (3), lazeight (3), lcordova (3), ldcbro (3), ldcso (3), leddmettle (3), leeho6651 (3), LEEM0N (3), leewj522 (3), lefade4353 (3), legaldrug4 (3), leka\_irk (3), lemonpixie10 (3), lenika41 (3), Leo1732 (3), leogarith (3), leol96 (3), LequiM (3), lerosas (3), lesenia (3), lessplease (3), lethien (3), lexwhamilton (3), Leyalic (3), Lgw827 (3), LHC (3), lienchen (3), Lightmayer (3), likeamaze (3), likeomg (3), lilb (3), lilbitnerdy (3), LilytheCat (3), LinaOBrain (3), lingchan (3), Link808 (3), lisaduncan42 (3), liulisa (3),

liveherenow (3), liznerd (3), lizzaran (3), ljhaining (3), llb03 (3), llorwin (3), llundi (3), LMGamble (3), load2010 (3), loak (3), login1004 (3), lolzer123 (3), lookitsbrook (3), Loopy (3), loow0709 (3), LordDiscord (3), lori\_barnes (3), lost01 (3), lowkeyloki (3), lsa0910 (3), LSH (3), luccajan (3), lucygeorges (3), lucyrose (3), luftwaffle (3), LuLu8 (3), lumikuxej (3), lurdos (3), luuu (3), lux395 (3), luxlucisaddo (3), lxfireman (3), lydwynn (3), lyw7668 (3), m262 (3), MaAd (3), macboogiewoogie (3), Macisvi (3), macouba (3), mad\_dash (3), madamme (3), Maedhros1978 (3), MaggiePI (3), maglor (3), mahanda12 (3), majorkong (3), mali0 (3), malouu (3), mambosky (3), Manchot (3), mandajz (3), mandoobaba (3), mann34 (3), manoelle (3), mantronik (3), Manuel.Hamburger (3), marco88 (3), marcooo (3), marcot617 (3), Margareito (3), margarinefly (3), maria\_mancini (3), marie510flin (3), Marinaaaa (3), Marinathepichu (3), marine0304 (3), mario64aq (3), Mariya\_Viter (3), Mark\_B (3), mark1008 (3), markbishop01 (3), MarkFener (3), martikchatterjee (3), Martin138 (3), maryb (3), marygress (3), MarzenaP (3), masunlang456 (3), mathl33t (3), matisekmp (3), matrixcakes (3), Matt\_9404 (3), matt64 (3), mattb (3), matthunt1984 (3), mattm (3), mattster918 (3), matwoj (3), maverick9xx (3), mawil (3), maxanatomy (3), mayaz135 (3), mayloveheal (3), Mbennett (3), mbray1 (3), mbretonumd (3), MBui1996 (3), mchusma (3), mcurling14 (3), md62105 (3), mdami (3), mdumenko (3), MDVX (3), mediszudikas (3), megaelch (3), megam888 (3), megan.graham (3), megatrondelux1 (3), megdarin (3), megflock (3), melabu (3), mell32 (3), menacingbanjo (3), mfc0rd (3), mfolta (3), mfreem2 (3), mgray9 (3), micah24 (3), micahr (3), michael26841 (3), michal36b (3), michalj (3), michelechaney (3), miho8550 (3), mikemyers0211 (3), MikeV (3), mikhfilippov (3), MikiHoshi (3), mikoo366 (3), minecake (3), miniP (3), minjeong.jo (3), Minosi (3), minsu601 (3), minxuan (3), Mioirel (3), miranda\_shaw (3), miro016 (3), miseyira (3), mishfish (3), Missing (3), mitej (3), mjohms (3), mkavatkar (3), mkc1061 (3), mkswift (3), ml85063 (3), mldfairbanks (3), mlehman (3), mlshowalter61 (3), mmatessa (3), mmbock (3), mmmichal (3), mnib (3), Mo8Jo (3), mohsenvand (3), MoKy (3), Monacoke22 (3), mononajones (3), monteiro.lale (3), mookyeongkim (3), moon8689 (3), moongunflag (3), moonhyung11 (3), Moonie (3), mopgut (3), Moritz11 (3), Mormy (3), mprebula (3), Mr0815 (3), MrACP1911 (3), mranarchy (3), mrburglar (3), mrdandyman (3), MrGreenthor (3), mrogers (3), mrsillyfanny (3), mrspix (3), MrSquiggles92 (3), MrZuyeg (3), MsAna (3), MSanders (3), mtalon (3), mtc05 (3), Mtvput10 (3), mugsyxoxo (3), mukarra (3), mulan257 (3), mumu41 (3), murphy9904 (3), music91 (3), mw52581 (3), mwalien (3), myarnell (3), mycroft3x (3), myeyes (3), mykey93 (3), n01261 (3), n3roxis (3), nam0198 (3), NamelessX1314 (3), nanato (3), nanodestiny (3), nanoman9 (3), naomiblue (3), napier (3), nates10 (3), nattr94 (3), naturizen (3), naubound22 (3), naveenkrishnan (3), navyjeff (3), Nazzah (3), ncsaecha (3), nedcooked3 (3), Neitsch (3), neledw (3), neunr (3), neuroak (3), Neuroloop (3), neuromancer (3), newlande (3), newman2022 (3), Niboros (3), niby\_nic (3), nickananas (3), nicobenp (3), nicoleenglish2 (3), nijiranger (3), nikapika07 (3), nikolaa (3), nikoselby (3), nimbleb (3), Ninae (3), ninestar22 (3), nire45678 (3), nisdream7 (3), nitto311 (3), njlae (3), nkalathil (3), nmnm7097 (3), nolan\_18 (3), nostakhan (3), nou1337 (3), nova (3), Novi110 (3), nsarens (3), NTULS (3), nudimmud (3), numb (3), NxtGenGuitar (3), Nyap (3), nytewulf (3), Nyurae (3), o\_onica (3), OathMate (3), Oceanbreeze (3), ocfuu (3), ochausis (3), ogilviej (3), ogren (3), oha523 (3), oizys (3), okkce01 (3), okuyabiliyor (3), olage (3), oliv (3), olivus (3), OmarBca (3), onemanrace (3), ono2 (3), optimusbryant (3), optonip (3), oseiler (3), otebear (3), ottz1951999 (3), outlier (3), OvertOddity (3), P3tch (3), pablolorencio13 (3), pablov (3), pacofn80 (3), pampam (3), pancala (3), parinima (3), parkaab (3), Parkchoa\_queen (3), pat5005 (3), pateeb11 (3), paulmhr (3), pawzubr (3), pbbpaul01 (3), PCA42 (3), pearl1210 (3), pebble35 (3), pepijn (3), Peppelava (3), Peregrino69 (3), perigee (3), perterter (3), Peterkolios (3), petrik\_k (3), pfunkz (3), Phantom\_Assembler (3), Philentropy (3), phillip (3), Phillipdw (3), phortosmx (3), phreakerr (3), pianistybl (3), pictureque (3), Pieniadz (3), pieter\_ad (3), piglat (3), pigt2 (3), pikatron (3), pikoro (3), Pixelsk (3), plachta (3), plove (3), plusz0wy (3), Pojostick (3), pokekohn (3), polir (3), pomaaky (3), pompken (3), poppie55 (3), PoseidonFan1 (3), powerjis1 (3), Praios (3), pranav24 (3), preciouskitling (3), proga92 (3), propriome (3), prsctr0520 (3), PrudeHawkeye (3), PrzeAgent (3), psic9621 (3), psicosurf (3), psmhy0128 (3), psychmc (3), psychoDad (3), ptitced (3), Purplish (3), Pzlauris (3), pztrick (3), Qdajow\_PL (3), qh-fry (3), qrcoed (3), QuarKUS7 (3), Quetz (3), quill2 (3), quxwozing (3), Qwar (3), qwerasdzx (3), qwertymnbvcx00 (3), r\_j\_e (3), r0b0r0b (3), R0da (3), r0t0r (3), r0v3 (3), rabbity (3), radu230 (3), rafadias (3), rafferty97 (3), Ragoon (3), rainbow2911 (3), raincjh (3), rajkumarboggala (3), ramoan\_sanchez (3), Ramonz (3), rappp01 (3), raqbro (3), RayLiu (3), razmajaz (3), razvan\_costache2000 (3), rbisakha (3), rcaffrey (3), rcarter2 (3), rdslade (3), realharim99 (3), rebelsim (3), Rebix (3), reculeao (3), redap123 (3), reddfused (3), redhooligan82 (3), redruck70 (3), REEMO (3), reilly\_mc3 (3), Reploid345 (3), Reskee (3), revtom (3), reyvin92 (3), Rezukiel (3), Rezzaled (3), rgagen (3), rgc (3), rhea2013 (3), Rho (3), rhomanji (3), rhwns327 (3), rhys5584 (3), ria (3), rianemartinez (3), riannam (3), ripley-may (3), rivercityken (3), rjoyceapple (3), rkskefkak132 (3), rlawlgh8809 (3), rnagel (3), robertkelly (3), robogirl.06

(3), RoBorg (3), robrock10 (3), rochelle (3), rock\_e\_road (3), rogerchaos (3), roik (3), romanika123 (3), rombod123 (3), ronrita (3), roo\_tie (3), RookActual (3), Rosch9 (3), rotatoes (3), rottis (3), rougebeast (3), rozakatayeva (3), rpm003 (3), rrushmorree (3), rsmith2020 (3), Rubeni (3), rudgus (3), rudy123 (3), rushmore (3), rutaci (3), ruthan\_c (3), rwelingen (3), ryanm212 (3), ryudragon (3), s16007 (3), sabbathorn (3), SafetyMan (3), sagarg (3), sahaqvish (3), sakurablossom (3), saltpalace (3), sangohk71 (3), sanguineArtificer (3), sansbjerg (3), santiaga (3), Sarah1 (3), sarah88 (3), Sarah96 (3), sarahbpeaceful (3), Sargerass (3), sari (3), sashaformari (3), saverio (3), sayakakoga (3), sbekkum (3), sc0ut (3), scain (3), scd1010 (3), scnoobi (3), scottmouse (3), scrat (3), Scribblewell (3), sdgsdfs346 (3), sdhawan7 (3), sdm1013 (3), sdthornton (3), SeaPancake125 (3), Seaslug\_of\_Doom (3), seasuncion (3), sebastianme (3), sedna (3), seeebek (3), seelan (3), Seer (3), senral (3), seolmo (3), Seoyoun (3), seth54050 (3), seth72104 (3), seymourtemplar (3), SgtLama (3), sgwngud (3), shaahin (3), ShadedDude (3), shadowryuk (3), sharingan (3), sharkin09 (3), Shawnwzy (3), shearnerd13 (3), sheckley (3), sheeo (3), shenlijun (3), sherbornepostoffice (3), shidoshiek (3), Shigerux (3), shil (3), shiraz.shahid (3), shiut (3), shou (3), SHSH (3), shtoweever (3), shyunju3 (3), siah0616 (3), sickdog1028 (3), siddraj (3), sierra\_lewis (3), siette (3), sillystring22 (3), silverviolette (3), simjaeyoun2 (3), simplysalma (3), since1990z (3), Sirabby (3), sirenask (3), sirjab (3), sitco (3), skaji91 (3), skalette (3), skarama (3), skdus8605 (3), skilleffer (3), skittlemom (3), skizz (3), skrillek (3), SKuLL (3), skullyard2000 (3), skycaelus (3), skype153 (3), skysaver00 (3), skytron (3), slideshow (3), Slugemz (3), slwarmac (3), slysamdogs2 (3), smcclosk (3), smeden (3), Smerity (3), Smid (3), smishra613 (3), smithweiss (3), smittysmitty (3), snah2 (3), snaka (3), sncnova (3), sodie (3), soheildemc (3), solosalidista (3), solsam10 (3), son2sam12 (3), Sonata (3), soneerajohn (3), soohyun (3), sophieaisanford (3), sophiechang (3), Sord (3), soremk (3), Soulegoin (3), soy\_leyenda (3), soYS (3), soyunkope (3), sp4cex (3), space928 (3), spammy2 (3), spanmatt (3), Sparkles (3), sparklinggalaxy (3), SpicyRamen (3), spiritedri-  
noa (3), spunky86 (3), squallnn (3), Squared (3), squilliam92 (3), squirrel52 (3), sr256 (3), srchastain (3), srhenry (3), ssonicblue (3), stanislavanislav (3), StanislavLitko (3), stanleygkk (3), stark (3), starpuppycz (3), ste (3), Steaz (3), Stedden (3), stefano\_basili (3), stephencox (3), Steven\_goldberg (3), stevendeg (3), stopwatch (3), stormrunner911 (3), stormygrape (3), strandro (3), Strato\_Caster (3), straubkornel (3), strawman (3), suemesoomi (3), sum\_ (3), sumkrn-  
boy (3), sumosumo84 (3), sundanlotion (3), sungjaecar (3), suniti (3), sunsun (3), superhofstad (3), Supernatural (3), superrealz (3), suptomatos (3), suravee (3), surphninja (3), sws4444 (3), sydneygracel (3), sylviaivanhorn (3), syochi (3), SzymonM (3), T1 (3), TACOMOLEC (3), Tadelman (3), taehyun1203 (3), taewang (3), tahoang (3), tailintalent (3), takagreen0615 (3), talinna (3), Taminiora (3), tamlyc1 (3), Tanisha (3), Tarcisiex (3), tasroth (3), tastiger (3), tatefitz (3), TaylorT (3), tazosek (3), Tboneash10 (3), tchou82 (3), tcunius (3), teahee04 (3), tearfuls (3), Ted72 (3), teejers (3), teflonzan (3), Telesam (3), Tempus35 (3), Tenanx (3), terrym (3), tessa.kilbane (3), test2363 (3), testr (3), tf8274 (3), thallat (3), thallium314 (3), The\_Bob (3), the\_mhurley (3), TheAcismo (3), thealla (3), TheCraftingStu (3), thedonabriano (3), thedreadfrost (3), TheEpicGingerMan (3), thefisher86 (3), TheHeadDoctor (3), theinkbitten (3), TheIronHobo (3), thelumosrose (3), thenix (3), TheNuker101 (3), Theobroma (3), ThePhoton77 (3), TheSETJ (3), Thess (3), thiesp (3), thmo (3), thodorisilias (3), thomaskl2005 (3), thor560 (3), thowe (3), thwjd9691 (3), tiamarie49 (3), Tieler (3), tierrany (3), Tihan (3), Tim4tintim (3), Timmaster100 (3), TimmyW (3), timothyx (3), titusandseb (3), tjdwls5916 (3), tjpc3 (3), tmdals6859 (3), tmjdontplay (3), tmvn (3), Tnipples (3), tnrdlzz12 (3), tobonana (3), Toby185 (3), tofyfe28 (3), tokki99 (3), tokra75 (3), toman (3), tomlyb (3), TomScotch (3), tonym128 (3), toonlord27 (3), torterror (3), toso (3), tothy (3), totogwada (3), ToxiCore (3), tpd79 (3), TPM\_23 (3), traiger (3), travsud22 (3), tree1203 (3), trevans (3), trevorp23432 (3), trinity8036 (3), Trisco (3), TristanTartine (3), tryona (3), tshideler (3), tsztszt (3), ttrunks (3), Tucjan (3), tuggernongy (3), Tune423 (3), tushar87 (3), tvaliulis (3), tvcl028 (3), twtwinnie (3), Tyalla (3), Tyrannicalduck (3), tyriorin (3), tysonedwards (3), ubar (3), uboot (3), ulala0409 (3), uncabubba (3), unclerfritz (3), unidiode (3), uraqtc (3), Urgo (3), v\_glis (3), valedecem (3), valente26 (3), valmorin (3), VanceMatt (3), vashmata (3), Vattengurka (3), Vectoro (3), Velicottero (3), vellatina (3), verbatiman (3), verve (3), vicfabrice (3), viper1209 (3), virivania (3), vlad12 (3), vmatev (3), Vortexian (3), vtv (3), w4spo (3), wah0326 (3), warmakert (3), wartorn (3), wartoy (3), wbhamsters (3), wconrady (3), weetabix (3), weirdotr (3), welcometohk (3), WeskanPsych16 (3), wgallion (3), wh1zzzz (3), whalevil (3), whdaudbbs (3), whisraper (3), WhiteBlackBear12 (3), WhitePanther (3), whitetiger90 (3), whitwyatt (3), why8980 (3), wiedenbeckww (3), williamrice (3), wilso\_will (3), Wired0110 (3), wiz-  
kid (3), wjbong (3), WN (3), wndlla (3), woo010529 (3), woodmibm (3), Wredi (3), wrightml (3), wyliejones (3), xaime (3), xanman11 (3), xavenia (3), xavier88 (3), xbetas (3), xcele (3), xcentric (3), Xender1500 (3), XeonKnight (3), xespr (3), xeuton (3), xhead (3), xmarkeyex (3), xoxxvanessa (3), xpherion (3), xQuber (3), XTR (3), xtra (3), xuan70302 (3), xuancanh (3), xulyesh (3), xxkittenmeowxx (3), xynkun (3), yabes96 (3), yazmin\_H (3), ybs04 (3),

ydaniela (3), yellowcandle (3), yeswecan (3), yetti12345 (3), ygunes (3), Yinabelle (3), yingquan (3), yiotta (3), yl (3), ymartsar (3), YoL (3), Yolf87 (3), yoosiba (3), youb1201 (3), Yukki (3), yunalee (3), Yusukelt (3), yuvi (3), zach54 (3), Zachariah.Rosenberg (3), ZAQ (3), Zarnotox (3), zaur (3), Zebulon1986 (3), zenaj (3), zjemcikoteczka (3), zmorasta (3), zodiac\_987 (3), zombiemuerto (3), Zorbedit (3), zrink (3), zsquared (3), zubterfuge (3), Zwanzig (3), zwhitlow (3), zxcaoao (3), \_korean\_ (2), \_lucky\_kitty\_ (2), ... (2), 0705jamie (2), 080668au (2), 08dhokian (2), 101202303 (2), 1028380185 (2), 1044657725 (2), 1050986430 (2), 107421 (2), 1106qwe (2), 111112 (2), 12345214 (2), 1313 (2), 1359385 (2), 21axels (2), 2904rex0429 (2), 2airtoon8 (2), 3063226 (2), 321panda (2), 3Riangle (2), 3rmieXL (2), 4ensicchk (2), 4ljg (2), 5k5k39 (2), 5teve (2), 682777 (2), 85fiona (2), 8ami (2), 9199as (2), 920530 (2), 956509 (2), A.Accuser (2), a1handgamer (2), a214490 (2), a8382a (2), a88mercury (2), aaodell (2), aarulnam (2), abairavp8 (2), abcde (2), abdomin (2), abel (2), abie (2), abigailjean (2), Ablet (2), absquatulate (2), AbuMaia (2), abyss2557 (2), acchilles (2), accipiter924 (2), acheld (2), achimedes (2), acicas (2), acidvision (2), acomus (2), acool95 (2), acsnyder (2), Actty (2), acugila (2), ad895 (2), adarsh1 (2), addisbelle (2), adityaanibha (2), adler (2), admintre (2), adowling-physics (2), adp567 (2), aeiou111 (2), aerodawn (2), Afezeria (2), afrox69 (2), agelfdude23 (2), aggramar (2), ahipkins (2), ahndonghyeok (2), air97in (2), AirDaemon (2), aitor (2), aiva (2), ajc742003 (2), ajdracula (2), ajerez (2), ajfi (2), ajs209 (2), AJS64 (2), akbrandon14 (2), Akhtem (2), akkaraboo (2), aklion33 (2), akuone (2), albert\_christian (2), albi (2), Aldaron (2), aldebert (2), alejandro.f (2), AlessiaTonelli (2), Alex\_Karmash (2), alexander\_ng (2), Alexandra\_Marta (2), alexdayal (2), alexmanzandra (2), alexmgreer (2), Alextheoneandonly (2), alfiya (2), alh84001 (2), ali12345 (2), AliceCH (2), aliciagallo14 (2), alisondana (2), alito (2), allicat (2), alliebeers (2), AlliWB (2), allo (2), almny (2), alsid (2), alstjr0177 (2), altanthares (2), amanda\_weber (2), amberann1 (2), amberR (2), AmberWolf12 (2), ameechka (2), ameenmeddaoui (2), amhyejeong (2), Amin (2), amlove (2), Amyantonsen (2), amygdala42 (2), Anaoleriny (2), anarinceanu (2), anarki (2), anatta (2), Anayanci (2), AnCh (2), anchmike (2), AndBinny (2), Andemyan (2), anders (2), andersc (2), andormaybe (2), Andreaskk (2), andrew.horn (2), andrjew (2), andycul (2), andynorton (2), angeloepsi (2), Angelof (2), angieyaich (2), Ani93 (2), anickerson (2), Anil (2), anjie (2), Annacode6 (2), annatune13 (2), anndragod (2), anni192 (2), anniyahlacombe (2), annking (2), anogeia13 (2), anonaman (2), AnoniMouse (2), anrjiaos (2), ansonlau125 (2), anton777 (2), antonigardener (2), anonym0re (2), anzacspirit (2), aojonan (2), aoswpaks (2), apearce (2), aprilhdh31 (2), aqswdefr (2), archies4000 (2), Arely (2), arfdawg (2), arisvog (2), armando77 (2), Armands (2), arner76 (2), arnesonw (2), arnof (2), arnold518 (2), arosenst (2), arseniccatnip (2), artemisa29 (2), arthur.verwoerd3585 (2), arudj (2), as (2), asaffran (2), asd3 (2), asddsa (2), asdfasdfadsf (2), asdfmeny (2), asdyahoo (2), asenath (2), Asere (2), asgarmagol (2), ash555666777 (2), ashard (2), ashieber (2), ask123 (2), aspacek7 (2), assdaft (2), assessor3 (2), astridg1 (2), asulli7 (2), athos (2), atknox (2), ATL347 (2), atmos (2), atypick (2), AubrieGail (2), aurelius360 (2), AustinRobertson (2), avaldez (2), avander44 (2), aviladca17 (2), aviv32111 (2), awais12506 (2), awshac (2), azathot93 (2), b\_arts (2), B\_Swadener (2), b216 (2), b4paper (2), babyhchu (2), backbag (2), baddna (2), badereye (2), baebaebae23 (2), bald (2), Balirka (2), Baloe (2), baltosh (2), barakeel (2), barbarama (2), barborka123 (2), basim288 (2), basma (2), BassKong (2), Batley (2), BatLiz (2), bbowman (2), bealsie2 (2), beardhead (2), be-carbone (2), beckyh (2), beijingrich (2), bella27fille (2), bemaio (2), ben.cocanougher (2), bencha (2), BenHizak (2), benjabeen1 (2), Benji\_G (2), benjin419 (2), bergonzik (2), berlen5135 (2), bernz (2), bestgh07 (2), bestoweroflight (2), Beubs (2), bexxierawr (2), bhelapuriprasad (2), bhindspiningssilk (2), bi (2), Biba (2), BigBlackBurntBread (2), BigDaddyXD (2), bigpine7 (2), bikersopwith (2), billymfh (2), biocs (2), biomaya (2), bion (2), bipedal (2), bisyh1016 (2), bitter (2), bjmilller (2), bjmin0415 (2), bla5 (2), blackbasketdog (2), BlackBird604 (2), blackfyre (2), blainebyrum (2), BLAKE\_T (2), blam417 (2), blast335 (2), blatant\_fool (2), Blauvogel (2), BlazingGuns (2), blight92 (2), bltnole (2), blubeski (2), bluechry (2), bluex (2), bluj126 (2), bmhlee (2), bmrtns (2), bo7833 (2), bob1234567890 (2), bobsims (2), body\_LAB (2), boek0007 (2), Boer (2), bohemian90 (2), bookspet (2), booyireto (2), boppitywop (2), BorjaMG (2), bornagainscholar (2), bostonquad (2), bouzajp (2), Bozo (2), braebrae7 (2), brain\_squiggles (2), Braingaming (2), brainiacanubis (2), brainmusick (2), brainone (2), brandon\_kirklen (2), Braydenhastings (2), Breadman5162 (2), bred-bred (2), breithaupt (2), brendables (2), brett.jones (2), bri\_hibna (2), briankeith14 (2), Brianouyang (2), brianpetty (2), briar91 (2), BrightBits (2), BrightonBlue (2), broadie654 (2), brokeninfinityx (2), bronx (2), brooksben\_123 (2), brother0326 (2), bruceware (2), BrunoFPT (2), brutux (2), Brycespielman (2), brypough (2), buaa\_lyn (2), buckaroo (2), bucnut87 (2), buio (2), bullfrog503 (2), BumjoonKim (2), bungalally (2), burly (2), burzum (2), bynary (2), bysse (2), bzcshop (2), BZlumberjack (2), c\_herse (2), C.Flo (2), c00kles (2), C5H8NNaO4 (2), cabose2277 (2), cabukowy (2), caek (2), caela1995 (2), cai888 (2), Caiti (2), caitlyn\_w (2), CakeFox (2), cali2 (2), califf (2), camdenbuzard (2), Campbell0785 (2), Canhill417 (2), canislupas (2), caporal (2), Captain\_Chivalry (2), CaptainEpic (2),

captainlate (2), CaptainQuacks (2), captainyobro (2), CaptFalc (2), captinm (2), carlmlewenhaupt (2), carlosencine (2), Carolsam327 (2), carrotwashington (2), cartwrik (2), casethespace (2), casevillan (2), CatalinT (2), catharsis19 (2), cation (2), catwoman (2), cavemanfilms (2), cblack (2), cboyd (2), cbsolian1021 (2), cbwest (2), cchristian (2), ccntlzrd (2), ccorey2019 (2), cdgarcia17 (2), cedeelbe (2), celino (2), cerajack (2), cewsey (2), cfr0g (2), cgw0528 (2), chad\_ (2), chajiho (2), chandran (2), chansu0511 (2), charonx (2), chcorey52 (2), cheetah03257 (2), Cheez (2), chefcurry30 (2), Chemkos (2), chiba1993 (2), chigo (2), chiliechees (2), chilp (2), chilton82 (2), chixistigma (2), chodhill (2), choiwc1128 (2), chotoro (2), Chris150 (2), chrisychau (2), chrismaes87 (2), christhawk (2), ChristopheDP (2), christopherosep (2), chromaticfox (2), chrome (2), ChuChuRocker (2), Cilla (2), cinlib4 (2), cit5055 (2), Ckat (2), ckchuaa (2), ckh5485 (2), ckho0777 (2), cla (2), Clams (2), claraanncheng (2), clare940520 (2), clavica (2), cloudchi (2), clyburn209 (2), cmcburney (2), cmclaughlin (2), cnkhy (2), CODandponies (2), code221 (2), codingTrickster (2), codywest (2), cogbrain (2), cohenhead (2), coleyw23 (2), come.as.youre.not (2), Conanap (2), connected (2), Constantinople (2), Contessac (2), convert (2), cookiegg\_43 (2), cookiestuf (2), cooperevans001 (2), corbynrobb (2), CoreyRats (2), cornwellington (2), cqdevetter (2), CraddleXofXFate (2), Craftsmile (2), crazybird (2), CreationTribe (2), Crepez (2), crirkdlq (2), crislamed (2), crisogata (2), cristinao (2), crocano861 (2), crock (2), CrownedRed (2), croy (2), crzyacey (2), csh (2), csjin2007 (2), cstadler (2), ctyler15 (2), Cubbie5434 (2), cur\_n (2), curtis.burgess (2), cvs3470 (2), cwjoshlee (2), CWood (2), cyaneko (2), cyantific (2), CyceAkaDojce (2), Cyclops (2), cyjackx (2), cymro83 (2), D\_EGO (2), D.A.R.E (2), D0gf00d (2), Dagda (2), dain8698 (2), dair (2), Daktari (2), dalekcaan42 (2), dan456dx (2), dana.doomsday (2), dancebot1 (2), dandan (2), DangerEkItricty (2), daniel.nemeth.nemo (2), danielb (2), danielb154 (2), daniellec (2), danielmarin (2), danielr1 (2), danille (2), Danish2142 (2), dankuan (2), dannitykane (2), danomene (2), danup (2), daphnelb (2), daring (2), darksir (2), darthtatr24 (2), darude11 (2), DashaChibi (2), dave103 (2), dave64b (2), david.derish (2), david.eraso (2), davidgn (2), davidvartak1988 (2), davifec (2), davinia3 (2), dawgdoc2000 (2), daytripper114 (2), Dazim (2), dbryte (2), dcdtd (2), ddg1330 (2), ddiler (2), de\_noe (2), deadsunrise (2), death (2), debbysmith999 (2), debomb72 (2), DeF (2), Defalt (2), defiines (2), dejagg (2), Del9fina (2), delaczar (2), delfiler (2), delirez (2), delterau (2), DemiGod32 (2), Demiurg1989 (2), deny\_conformity (2), Derax (2), desnoo (2), desrosiersme (2), Devilinside (2), DevinLea88 (2), dexairos (2), deyskil (2), dflanagan (2), DFS (2), dguri1997 (2), dh9322 (2), dianezaia (2), dianzelu0416 (2), diciplina (2), difi (2), dimitry (2), dinel (2), Dinodarwin (2), dirkwindhorst (2), Diyabanerjee123 (2), Djalminha (2), Django1812 (2), djlee1998 (2), djoub (2), dl607aq (2), dlaud5379 (2), dlkssnfl32 (2), dlxorrbe (2), dman12 (2), dmenozi (2), dmsql1379 (2), dnrpromo (2), dnuebling (2), docmagoo (2), Dogeifier22 (2), DominicSturt (2), Doncho\_Donchev (2), Donhuls (2), donkid33 (2), donnertdog (2), Doodlegirl (2), doogyhun (2), dook\_willis (2), doorong7297 (2), douglasdtltd (2), Dr\_Blicknix (2), draceldragon (2), Draedon (2), dragily (2), drakensoul (2), dramaqueen (2), Draven (2), Draxden (2), drblood (2), dremadd (2), drew (2), drosophilately (2), DrWowa (2), dschippe (2), dsussman (2), dtlchen (2), dtloyd99 (2), dudghks0625 (2), dughibot (2), Dulet (2), dumbo9710 (2), dumyvaly (2), durumi (2), dutchdubs (2), dwaynebyrne (2), dwchatfield (2), dwoodard (2), dyd4dsh7 (2), dziq\_93 (2), eagle5 (2), Eagledjk (2), ealvap (2), earnor (2), earora4498 (2), eblau (2), ebob0531 (2), ebowe (2), ebynum (2), echoic (2), edalquist (2), Eddey (2), eddy (2), Eden821 (2), edinaldo (2), Edita.krisciuniene (2), Edsel (2), edwin (2), efikle (2), efolch (2), eg4983 (2), egeier1543 (2), eggy91 (2), egyptnile (2), ehdta2005 (2), ehei (2), ehelms13 (2), einzors (2), Eisenhund (2), ekin (2), ekgus2804 (2), ektha227 (2), eldpsxpf (2), eleanor96 (2), ElectricIcecream (2), electroloop (2), elementicy (2), elenigrekidu (2), Eleott (2), Elferador (2), elija (2), ellie.nor (2), elrondesmith (2), emily244 (2), EmilyO (2), emmaarose (2), emmitemmi (2), emogirl1998 (2), EMP (2), emseefftee (2), endmoor05 (2), EngineerNinja (2), enirten (2), Ennallves (2), enstien (2), epclarkejr (2), ereyes1 (2), Erin\_Barnes (2), erpick (2), errolmacky (2), ert2154 (2), erzampag (2), eslyfcjr (2), esm2003 (2), esperto (2), Etheriel (2), etorstveit (2), euchrechamp (2), eugenskt (2), evan2718281828 (2), EventideNova (2), evidene (2), EvlNjaMnky (2), ewartstrom (2), Exarfun (2), Exnayer (2), explore (2), eyedonotknow (2), Eyewire11 (2), eyewirecac (2), eye-wireplayer1 (2), eyewirez (2), f0x (2), f1332196 (2), FabioGabrielRibas (2), facultya1479 (2), fafafa (2), FakerJoe (2), falcotorino (2), fandu (2), favor0924 (2), fede123 (2), Feefa (2), FegEuph4 (2), felix1998 (2), fengzhijie (2), ferox (2), ffasang123 (2), fgc92 (2), fifw (2), FikanaSiRet (2), Filippo\_Bravi (2), finnoklip (2), fittizio (2), FixMyBrain (2), fkdudrjs (2), fleapea (2), Fleischpirat (2), Flo66 (2), flufyflufybunny (2), flydr11 (2), flyingkiwi (2), flyingpancake (2), fnapier518 (2), fnqpxm (2), foggysnow (2), Force\_of\_Will (2), fotoguero (2), francescatse (2), Francesco.Zappa (2), Francesco96 (2), Francisco\_Simoes (2), franx12 (2), freddo (2), FredFrance (2), fredgui (2), freeze (2), friedapi (2), frodo999 (2), froggyspad (2), frogmatter (2), frogsice\_1 (2), frozenfeet12 (2), frozenfinn (2), funnyapple (2), funsized (2), fuzic1 (2), fvenediger (2), fvp (2), fxotrot (2), G3ck0 (2), gabba (2), gabe559 (2), gabriellee (2), Gage515 (2),



Galenwin (2), galinkinlin (2), gambi92 (2), Gamerboy913 (2), gamezter (2), gamingjanitor (2), garsnoo (2), Gawel (2), gaymer808 (2), gbart (2), geegadman (2), geekykhana (2), GefO (2), GeneralHans (2), geneski (2), genetti (2), geo0623 (2), GeriK (2), geroge (2), gerrai (2), GhostDagger (2), ghereler (2), ghh01910 (2), giancuneo (2), Gibaldi717 (2), ginobrancazio (2), GioAc96 (2), gioanno (2), gjgj (2), gklrsrinivas (2), gkssk0v0 (2), GlacticEagle (2), glen203 (2), globalmatt (2), GLUP (2), Gmambros (2), GNO (2), GOA\_AMo (2), GOA\_RBr (2), goathoue (2), gocards (2), goddesscirce (2), Godkezza (2), godsgirl (2), golden0106 (2), goldone2345 (2), goldpeople (2), gongfarts (2), gony4680 (2), goodflyer2012 (2), goot (2), Gorasosh (2), goswick (2), goznalo (2), gpal0308 (2), gramps (2), grannynanny (2), grebel (2), green21 (2), green2kus2002 (2), greenblizzard (2), greglinton (2), Gremma99 (2), grimmster18zzzzz (2), Grimtin10 (2), Grossyg (2), guero\_9389 (2), gueser (2), guilhugas (2), Gulgezli (2), Gulrez2007 (2), gummi (2), gypakgypakom (2), gyud (2), h\_hussaina (2), haanylovy (2), hadol (2), haechan0711 (2), haenghaeng (2), halcyon990 (2), halleglidden\_28 (2), hana06 (2), hanchile2003 (2), hanlp (2), happy21time (2), happydog825 (2), harliesmommy (2), Harlot (2), harrydoodah (2), harrynose (2), hastein.cs (2), havroshe4ka (2), hawkfan78 (2), Hayk (2), hb2007 (2), hbshim (2), hc87 (2), hebelek (2), hectoruchiha (2), hedgehogkim (2), hee0379 (2), heejun9710 (2), heh3502 (2), heilkm (2), hekingil (2), helenahes (2), Hellfire666 (2), henna (2), herokjmcos (2), HerrKobold (2), heuijee (2), heyhihello (2), hiddenziggurat (2), higby (2), highlighter (2), hika24 (2), Hikari257 (2), Hikaru (2), hillarymarks (2), hillbo (2), his130 (2), hj1611 (2), hji70091 (2), hlittle6666 (2), hmhmhm (2), hmoses (2), hocki (2), hoih (2), holden2000 (2), holdtheridge (2), hollaholla (2), HollowayN7 (2), hollowuranite (2), hollyanna (2), holter12 (2), honolulu656 (2), hoogo (2), hooncchi (2), hotblonc (2), hrc (2), hrisafis (2), Hubertos (2), hutk1726 (2), hutsonml (2), huuman (2), hw9987k (2), hytttenhoof (2), hyungjeung77 (2), hyungyu423 (2), hyunseu (2), i\_am\_pickle\_lord (2), iamstephieeee (2), ianandrei (2), Ianspaugh (2), iasj0 (2), iblong2u (2), Icedgarr (2), Iggor (2), iglesiasceccchini (2), ihazahill (2), ihnks (2), iiAkiko (2), iisme95 (2), ilasal (2), ilax16 (2), ilikecinnamon (2), ilkevandenhoek (2), illnessm (2), illusivefingers (2), imdecarlo5 (2), imgmkr (2), imo72 (2), in43sh (2), ineedtostudy (2), inees02 (2), infinite.com (2), Informysiker (2), Inphiknight (2), inufalo (2), invis (2), InYourCourt (2), iperkk (2), iphone4life4 (2), ireland (2), ireneqiao (2), irishr (2), Ironduke (2), irongiant (2), Irrehaare (2), isaacdcn (2), isaacmcphoe (2), isigner (2), iskander13 (2), island616 (2), itchey (2), itspresto (2), ivanescu (2), Ivsovi (2), Ivy690 (2), ix54783 (2), izotop (2), j\_villanu (2), J.snail (2), j19588488 (2), jaakkokaras (2), jabesh21 (2), jacen560 (2), Jackbolton (2), jackhunt5 (2), jackspratt (2), Jacobhall (2), jadah (2), jagreen29 (2), jakechang9 (2), Jakeharkness (2), jakers9198 (2), jakester1100 (2), jakshay (2), james0107 (2), jamesons1 (2), jamiem999 (2), jamies (2), janac (2), janetc (2), janghyosik (2), Jango (2), janvera (2), jarmatu (2), jarodk (2), jasmin (2), jason\_p1 (2), jasondet (2), jasonmanley (2), jasonmclean (2), JasperNiklas (2), javalava (2), Jayb (2), jaygarg (2), jayhoh (2), jaykoop (2), jaysouza (2), Jazza\_Hat (2), JazzyP (2), JBallantyne (2), jbasilio (2), jbyler (2), jcarpio (2), jcc51190 (2), jd01 (2), JDMornan (2), JEAN16 (2), jeanasumrall (2), jeanetics (2), jecrwin (2), jedi-axle (2), jeeheelee (2), jeffrhaas (2), jelena309 (2), jeloni (2), jelwan (2), JenniferAnne (2), jennyjoy (2), jentyra (2), JenyaG (2), jeong910924 (2), jerame (2), JerrySolis24 (2), jessica10 (2), jfluck2019 (2), jfree\_ita (2), Jgalvao (2), jg-beefwellington (2), ji8681 (2), jif101 (2), jill24weiss (2), jim.jim.jim (2), jimalalexberger (2), jimmyjod (2), jinjin5939 (2), Jiramjarid (2), jisun (2), jj0001 (2), jjnaude (2), jppudding (2), jk501 (2), jkirk (2), jkossmann (2), jkquigs (2), jmax96 (2), jmmmuir (2), JMPSnape (2), jn78 (2), jnbntz (2), Joanna\_Aldred (2), joanna1234 (2), joannalee0214 (2), JoeDouble (2), JoeyNoelle (2), jofisch (2), JohanS (2), John\_Hurricane (2), johnchan1994 (2), johndelibero4468 (2), johne (2), johnny21 (2), johntag (2), JoMarie (2), Jonathan.C.Bean (2), Jonathan.soto (2), JonathanFist (2), jonathann (2), JonBonny (2), jonna1234 (2), jonnoark (2), jonowhite (2), jonsbeard (2), jordan111 (2), jordhold (2), josefacho (2), josephyim3 (2), Josh.McAnaney (2), joshgraeler (2), joshua.yoerger (2), josiahst (2), Jossi (2), jourdanwitt (2), jovanmartin (2), joy65 (2), jph3 (2), jpiorro13 (2), jprohrer (2), jpsgame (2), jrdahl2 (2), jreyewire2013 (2), jrmo14 (2), jsalisbury (2), jscalle (2), jshonly (2), jsnyder2 (2), jsomazz (2), jstallings (2), jtejada (2), jtownv3 (2), Juanantonio (2), juliabc (2), julpaf (2), June4206 (2), junghj (2), jungmanp00 (2), jungmanp01 (2), jungyun824 (2), junmono2 (2), jvkelly (2), jwgerber (2), jwo2 (2), jwugi89 (2), jxl5 (2), jyt503 (2), k\_bir (2), k\_diddz (2), k710mk (2), ka3n (2), kabacho (2), kaditos17 (2), Kai\_Scarborough (2), kaii\_inu (2), kaiob (2), kaka6756 (2), KAKAKAKOW (2), Kalashnikov (2), kalenxdd (2), CalvinL7 (2), kameyuki (2), kamickazi (2), kamiken (2), kamimatsu (2), kaminorai (2), Kamirai (2), kanderson321 (2), kanguscon56 (2), kannak (2), kapjava (2), karneithys (2), kastrull (2), katastrophiq (2), kateal (2), KatieRose (2), katieshing (2), katiesykerrs (2), KayKat (2), Kayleb (2), kbooreum (2), kburgert (2), kc5fkn1 (2), kcarley (2), kcc4063 (2), kcochran94 (2), kcus\_123 (2), kdh4187 (2), kdhong (2), Keberha (2), Kedzior (2), keeponriding (2), keetacongoo (2), kellygregg (2), kellyryder (2), kemery (2), KennySchmidt (2), keremmm (2), kerramaru (2), kertar (2), kesh (2), Kevni12 (2), Kewpri (2), kferguson16 (2), khairul (2), khet.assani (2), kiarins (2),

kickman (2), kids0936 (2), Kikut (2), Killerhellas (2), killerzac (2), kiltux (2), kimcm1203 (2), kimgah (2), kimnam888 (2), kimorange8541 (2), kimzip (2), kinakomochi (2), KingKohn (2), kingme (2), kintrbr2 (2), kipper (2), Kirrim (2), Kitraff (2), KittyCat (2), kjh6774 (2), kjmastro (2), kjohnson5809 (2), kjrhoops2006 (2), kkjc1 (2), KlausMausi (2), KleoKot (2), klgraeser (2), kluiszo.m (2), klynch1306 (2), km04150 (2), Koakland (2), kodeath (2), Koekepeer99 (2), KoFee (2), kolokolsa (2), KomurDark (2), konrado.m (2), koo7367 (2), koramona (2), korra (2), kover00 (2), kozik (2), kpsychas (2), Kr1kyn (2), kraynor (2), krcy88 (2), krisb (2), krisdb (2), krissirk000 (2), krissykat13 (2), krrst (2), Krzyk (2), Krzysiek2424632456 (2), ksbarne (2), ksmith (2), kun0503 (2), kuriel (2), KUSHfreedom (2), kvturner (2), kw16 (2), kwan96 (2), kwheeler1 (2), kwjorgenson (2), ky5724 (2), kyagl184 (2), kylew (2), kynax (2), kyurokon (2), kywrnjs (2), L2aven (2), La\_Vie\_En\_Rose1990 (2), labig (2), Laborratte87 (2), lacatalana (2), lacko997 (2), lacobraninja (2), Ladysmyth (2), LadyStardust (2), Laerion (2), laexl (2), laizarr (2), lakshkumar (2), lamplightenvoy (2), larrikin55 (2), lauch123123 (2), laura.geurts (2), Laurekha (2), laurel238 (2), Laurie63 (2), lawlight (2), lawrencejob (2), lbeckwith (2), lcbenson (2), lcsmith241 (2), ldcsche (2), ldcshaa (2), ldcsspy (2), leahhavener (2), leahktutu (2), leealexander987 (2), leec0312 (2), leeieye (2), lelabbady (2), lemlicious (2), lemurr (2), lenaav (2), Lenz (2), leolee (2), leongthegreat (2), leopippes (2), leptigu (2), lerdo (2), lflorencio (2), lhill (2), lhm730 (2), liamdriscoll (2), lidleone (2), lidea (2), liesjes123 (2), Lifeblood (2), lil\_mike21 (2), lilianc (2), lilj (2), LilyFengari (2), LilyRoseUtting (2), lilz (2), link\_to\_the\_cosmos (2), linley (2), Lirandil (2), liselady (2), littlekea (2), littlemapman (2), lizdawg (2), Lizzy123 (2), ljahns13 (2), llxx (2), LMARC59 (2), lmaxsmith (2), lmishaw (2), loganfuller (2), loganisawesome (2), loganishere (2), loganwagner (2), logi1000 (2), lonekrwl (2), look2010 (2), loonie (2), loopum (2), lorabeth (2), lory (2), lotufrommud (2), lotus108 (2), lovandy (2), loveben007 (2), lovecomma (2), lovesadly (2), lowtechsupport (2), loxe (2), lschenk (2), lsk9779 (2), lubei2859 (2), Lucas763 (2), lucdv (2), luckyduck (2), LuckyShot (2), lucpet (2), lucy\_wong (2), luganbruin (2), luishernandez (2), luismmolina (2), Lukanon (2), lukashaug (2), Luke\_pa (2), Luke3001 (2), LuksStar (2), lulujuba (2), Lumpylump (2), Lunatycia (2), Lupus27 (2), lusp (2), lwiles (2), lxp19 (2), Lyddie27 (2), Lyds (2), lym7573 (2), Lyse01 (2), Lyzzard91 (2), m\_girard (2), m\_ntantang (2), M1chao (2), m1rr0r (2), M3TT3 (2), macstringer (2), madmom2 (2), madurai (2), Magdalenaloves (2), magnus494 (2), magpieme (2), maik (2), Maincake (2), Majo2684 (2), maju (2), makalove (2), malcho (2), maldrini (2), malina (2), malleg\_a (2), mamilove98 (2), mandis (2), manorius (2), manvsyard (2), maor (2), maoriboy (2), mapilipc (2), Maratis (2), marcix (2), marco.wozniak (2), maresoemes (2), Mariacano3114 (2), MariaRM (2), marieen (2), marionk (2), markcarp58 (2), markdu1 (2), marlex (2), Marta\_Camacho (2), martina1985 (2), MartinaCh (2), martinjohn95 (2), Martka (2), martycell (2), marvod (2), mashenzia8733 (2), maslow (2), mason.mcclaym865 (2), mastapeace (2), masterblaster (2), Mateskwor (2), matgiver64 (2), matinyan (2), mattguy121 (2), mattvanhook (2), Mattysaiyan (2), mauro (2), maurwolf (2), maveraunnehir (2), maverickismynname (2), mawreeo (2), maximusulysses (2), Mazinot (2), mazza1214 (2), mb4828 (2), mbeyries (2), mbritt7 (2), mbrust1 (2), mc7 (2), mcalzado (2), mcanonico (2), mcapp (2), mcm0004 (2), mcope (2), mcroberts007 (2), mcrosa01 (2), mcsharp (2), mcsx3 (2), meagle28 (2), meatcomputer (2), meaux (2), medusacascade (2), meduzak (2), meee723 (2), MegaCutoverTie (2), meijer00 (2), melhamous (2), Melmelmel51 (2), MeowMeowMeow123 (2), mer49011 (2), mercedes (2), Merro (2), Mery2384 (2), MessengerFromHell (2), mgirl (2), mgodwin (2), mhallaj (2), MHL (2), mhuang (2), michael\_rain (2), MichaelaK2014spypond (2), MichaelC1 (2), michael1t (2), micheel6 (2), MickeyHess (2), Midna (2), mightyjongyo (2), mightyzero (2), Mike7L (2), mikegreen1974 (2), mikehunt (2), Mikei6 (2), mikelele (2), mikey8270 (2), MikeyZ (2), mikie (2), milhome (2), milkydeathgrind (2), Minedemon04 (2), mineny (2), miniguner (2), minjae365 (2), MinJea (2), MinJeong (2), minka (2), minseok1001 (2), minseoki2003 (2), mintyhippo19 (2), MissMiller93 (2), missyfrancie (2), MisterThalamus (2), Mitchel192 (2), Mkates33 (2), mkentgen (2), mlandon1 (2), mluczak (2), mmijangos (2), mnb3624 (2), mnemonie (2), mochamilk (2), Moe91 (2), mohamadbarca (2), mohammed.attas (2), molleke (2), mollyk (2), monchex (2), mondosockpuppet (2), mongswel (2), MonicaBerry (2), MonikaJ (2), moniqueeslima (2), monkeebratz (2), monkieG92 (2), MonsieurNezlong (2), moojieturtle (2), MoonLee (2), MoonsungJung (2), moor1984 (2), moosebalm (2), mops (2), Mor (2), mordaron (2), mordoc (2), morfinga (2), morganfleming (2), morgus (2), morph3us (2), MortyDuck (2), moshe (2), MountainDrew (2), mpl (2), mpri (2), MrA (2), mrdax (2), mrdurian (2), Mrfrith (2), mrluis07 (2), mrmeowsmeows (2), mrobert (2), MrRayquaza (2), msbukkuri (2), mssmith2 (2), mstubbers (2), mtgrasse (2), mucmuc (2), muratos (2), murkmurk (2), museka (2), Must (2), Mwb3rd (2), mylogin (2), mynameisroy (2), Mystweaver (2), n\_gunter (2), nacz (2), nadavy (2), Nahgg (2), nahte (2), nainkout (2), Najlalar (2), nalpillai (2), namurt (2), nano877 (2), naomi.j (2), NariKim (2), narrowbender (2), Narushima (2), Narvan891 (2), Nataliedel (2), NatCat (2), nate657 (2), nathangeard (2), nathanmaier (2), nauches (2), naughtyuser (2), nbeorhvosj (2), ncchiggy (2), ndp (2), Neal1 (2), nealcates72 (2), Nean00 (2), neats-

ketch (2), Necrotica (2), negativebaby (2), neha (2), neonine2 (2), neozymandias (2), NeosQuanta (2), nerdalert24 (2), nervousneuron (2), neuro\_bio (2), neurobanipal (2), neurofox (2), Neuromancer1 (2), Neuromancer88 (2), neuropal (2), NeverBorn (2), neyugn (2), ngllongo (2), nh456852 (2), nhutton (2), niajin (2), niallos (2), nic\_246 (2), Niche (2), nickairspace (2), nickhiller (2), NickS (2), NicoleR (2), NiePlacz (2), Nightchanger (2), Nighthawk2 (2), nightwach (2), NikeeZ.Z (2), Nikolka (2), nikosbak (2), Nikso (2), nillaba (2), Nina-Louise (2), nitrosal (2), niu (2), nix71777 (2), niyo (2), Nizar (2), nj1994 (2), njmedin (2), nkshaf (2), nlipson (2), nman489 (2), nmanela (2), NmgpAlm (2), Noah\_TV (2), noahbrown (2), NobleM (2), nobody21c (2), nononoa (2), noob (2), norahmabbett (2), norchis79 (2), normk58 (2), normyli (2), nosoo11 (2), nothom (2), nouchy (2), novees (2), novicom (2), novikyual (2), nowuseeme123 (2), nrm2530 (2), Nseraf1 (2), ntlose (2), nubs (2), nunation (2), nurcini (2), nylatiki (2), oblacek (2), Octavi1124 (2), oded (2), odna (2), offk1lter (2), ogk5991 (2), ogrism (2), ohashi (2), okaragoz (2), okkurtanna (2), Oktrek (2), okuksenko (2), olesik (2), olia\_mos (2), olivierdeen (2), olliepopcorn (2), olpolpolp36 (2), OlyLady15 (2), omeomi (2), Omis2010 (2), omnis409 (2), Ondotr (2), onlinebaer (2), onwardtotheedge (2), ooink (2), oortt (2), optimismmime (2), orange4boy (2), OrangeLAD (2), Orca (2), oread (2), orj4qtsctib6 (2), orsen (2), osackers (2), Osedax (2), osj9791 (2), osori (2), otherair (2), oudendijkbo (2), ougaa (2), ouizard (2), Ow3n (2), Oysterfriend (2), oyt (2), oytun (2), ozdigennaro (2), pabloheitmeyer (2), pablozgz (2), pajulu (2), paleye (2), paliserce (2), pandaxpedo (2), pankajraj21 (2), papanewginny (2), paparga (2), papsphilip (2), parakeet (2), parik (2), parkejeff (2), parkseonhwan (2), parttimeninja (2), pathfinder (2), patrickheiges (2), pau1406 (2), paulca (2), paulepping (2), PaulineDSG (2), pawelabrams (2), pcasirag (2), pcshekhar (2), peachyogurt (2), pearlmutter (2), pecollette (2), peh515 (2), pekti-nasen (2), peltier77 (2), pemmd (2), penelopempresaria (2), penguinhwang (2), perchita (2), perla208 (2), perlguy (2), perryferbius (2), PeterJ (2), Petit.P (2), petronella (2), pgbunce (2), ph0x (2), pharakhos (2), phg0324 (2), phillipa (2), phillipsimons (2), Phlik (2), Phlosioneer (2), phoebe999 (2), phs5598 (2), physbrain (2), physics2 (2), physiojde (2), physiorfl (2), picachu (2), pierrelumiere (2), pierrodu38 (2), pilat (2), Pillgrim (2), pinkmonkguin (2), pinkstudios (2), pipars (2), Pisklan (2), Pixelsurfer (2), pkwitch (2), plat0n (2), Platinyannick (2), playajang (2), playground5035 (2), plum (2), pmj2080 (2), pochune (2), Poecilotherie (2), poen (2), poepoechi (2), pognseek (2), poilf (2), pointist (2), PoisonIvey2001 (2), poisonluigi (2), pokemaster (2), pomper05 (2), ponc (2), popjedi (2), postls95 (2), potato2000 (2), pplin3 (2), PPMBrouwers (2), pra (2), Prachip (2), Praia (2), praxis (2), primusdeus (2), PriscilaMG (2), prodigy76 (2), protect1122 (2), protectator (2), Protodesigner (2), pruthvik (2), psammy (2), Pseudocycle (2), psr9616 (2), ptandy (2), puerck (2), pufferpuff (2), pumako (2), purplemonkey118 (2), pyry (2), qballony (2), QBB123XX (2), qhgh (2), qkrcksqls5 (2), qmn (2), qptasd (2), qsscdw (2), quarks (2), Quartet (2), queenreyney (2), query69 (2), quickcat (2), QuixoticChris (2), quri92 (2), qvanegeren (2), Qveshn (2), r4ziel (2), rabbithole (2), RachelKS (2), rafiawesome (2), rags (2), raisins (2), rajat.patil (2), rajeshkanna (2), rakelley95 (2), raki3420 (2), raluttio (2), ralyfowler (2), random-person987 (2), rapskallyun (2), rarityneuron777 (2), rasdolbai\_k (2), ravenlockhart (2), raya (2), Rayt (2), Razumarx (2), RB (2), rddurant (2), rdifabio (2), rdwoodfrst (2), realsungjae (2), reaper125 (2), reaper247 (2), reb161813 (2), Redhawk525 (2), redneckredn (2), redshoemd (2), redskiesatdawn (2), redsoxfan527 (2), Redspecialist (2), reed0001 (2), reereemoo (2), refluxgirl (2), Remson (2), Reneeccg (2), renuka.baskar (2), reptorian (2), reris (2), Restorn (2), retina2 (2), Retro.Sapien (2), RetroHat (2), REvo (2), rewiera (2), rfn123 (2), rfx (2), Rhayader (2), rhatt9699 (2), rhkrurdl (2), rhysx (2), ribicicsanja (2), richardhyde (2), richardku (2), Rickton44 (2), RickyDeMann22 (2), rictic (2), rigby810 (2), rileycrane (2), Rin (2), riods (2), ripaholic\_ (2), rising\_storm (2), rkdkal2 (2), rladbtls1998 (2), rlatmdus97 (2), rlawndud100 (2), rleppane (2), rll (2), rllarson (2), RLoginov (2), rnsisso (2), ro0027ef (2), roastedneutrons (2), robbest (2), robert13605 (2), Robertoaguca (2), robin0van0der0vl (2), robross23 (2), rogerjlogan (2), roieki (2), roip (2), Rojano (2), rojerbrg (2), roman6791 (2), RookImS (2), RoomyBuffalo (2), rosana10 (2), rosanaservulo (2), rotfsmlsh (2), royimous (2), Rozoncor1 (2), rpawlo1723 (2), rpraneeth66 (2), rtabram (2), rtloper (2), rtp101 (2), rulas (2), RuMu69 (2), Runnerlive (2), rurack (2), rwws22 (2), ryanisis (2), Rybcia (2), RylanDelap (2), S0ulwars (2), sabah (2), sabel (2), SabrCruise (2), sacha\_h (2), Sacratas (2), saeru (2), sailjack (2), sakers8 (2), saldrian (2), sally3233 (2), saltatory (2), sam.baker777 (2), samanthaleenell (2), samdaman1212 (2), Sameer (2), samhain\_grim (2), samrsp (2), samtheman (2), samzhang (2), sanchezsanchez.paco (2), sangw0 (2), SAnhPa (2), sanja89 (2), santam34 (2), saperste (2), saphy (2), sara\_jevo (2), sarahgreene13 (2), sarahpalmer24 (2), sashrika (2), saulgarcia (2), Saya (2), saykojack (2), sbc0614 (2), sberek3 (2), sbgo129 (2), Sbidl (2), sbogli (2), scandent (2), scarydeaddan (2), schnubiiii (2), schulzcat03 (2), ScienceGamer (2), sciencegeek30 (2), scorpicon (2), scottbeeson (2), scytale (2), sdenzler (2), sdsh511 (2), sea7511 (2), seabiscuit (2), seajmo (2), seamus1 (2), Seapigs (2), sebalander (2), sebastian (2), seeriktus (2), semirandomstuff (2), semper.veris (2), senorcamos (2), Sephiroth01 (2), Sephy (2), serenefarj (2),

serket (2), serno (2), setrin (2), seuni0901 (2), shadowmagick (2), Shadowpi (2), shahurmit (2), shaolinvalkyrie (2), Sharon0218 (2), shasyd15 (2), Shaul\_Yahil (2), shaunmartin (2), shawninder (2), Shaxx (2), ShayG (2), Shayla\_4Ever (2), shb06266 (2), shbang747 (2), she5los (2), Sheepsnoop (2), sheisaheroine (2), shejminakhtar (2), Shellback (2), shellblue (2), shevan123 (2), shevanel (2), Shiaobin (2), shilan (2), shimerda (2), ShiroKuma (2), shmoo (2), shorter-girl06 (2), shoshanaz (2), shreddermom (2), ShrekTehOgrelord (2), Shricky (2), shubobs1 (2), shupper (2), sidlee (2), sihayuno (2), silasyeem (2), Silence1515 (2), silver\_marmot (2), Silvester (2), silvrfish8 (2), Simmons (2), simonmccallum (2), sinox (2), sirhanni (2), sito (2), sixigma (2), sk264106 (2), skanes17 (2), Skapala.afa (2), skatertader (2), skdus0615112 (2), sketcher (2), skh20458 (2), SkipiEbr (2), skp363 (2), skraemer (2), skshoony (2), sksmsfhdns (2), Sky89 (2), skyle (2), skypillar (2), skyun89 (2), sladjana (2), slegna (2), slimjimlimb (2), sls11487 (2), slwlkfk (2), Sly (2), sm2504 (2), smadras (2), smaffy (2), smallgj (2), smartypants57 (2), snapelicious (2), Sneha\_S (2), Snowblind89 (2), snowonden (2), snspig (2), soad90 (2), soccerneb21 (2), sofia218 (2), Soft\_Sense (2), Solidus315 (2), solveig (2), songbaksa (2), Sonofmetal (2), sonofpsyops (2), Sophie\_Ng2405 (2), SorAzolam (2), sos880428 (2), sosaille (2), soustou (2), soycarlo (2), space0403 (2), space8390 (2), spaceH2X (2), SpaceStationFour (2), SpamOrdner (2), SPEC (2), splashofchaos (2), sporeinc (2), spot2061 (2), SpotlightKid86 (2), springermac (2), squintsalot (2), srherzog (2), sso2 (2), sso332211 (2), sstat95 (2), ssupermario (2), ssvc10 (2), staceyburnsy (2), stargate525 (2), stargazer82 (2), starrwith2rs (2), steamedbbol (2), Steelpipes (2), Stefaneee (2), stellarlenseprod (2), stephmancini (2), stevat1 (2), stevecz (2), SteveJames (2), stevena830 (2), StevenWernerCS (2), stifstyle (2), stonacek (2), stpinker (2), styles84 (2), suamai (2), suburiboy (2), summerson (2), sunbun (2), sungjae04 (2), sungmk86 (2), Sunidesus (2), sunmaster13 (2), sunnieli (2), sunstarrocksyah (2), supadupasad (2), SuperCake (2), supergiantcat (2), superouman (2), swiatlowod (2), swimquill (2), swish (2), swisherlor (2), swmd001 (2), swpark7 (2), sydneyxrose (2), Sylveadiff (2), synyster\_jh (2), Sytske (2), t\_rey (2), t0035 (2), t0mm0 (2), tacotuesday (2), tadayuki (2), tamborilaire (2), tankng (2), TapirOrange (2), Tarjek (2), tatjana123 (2), Tautime (2), tbkbbk (2), tblood (2), tealatte (2), tegzie (2), Teja (2), tekverkp (2), tellleoonce (2), templla (2), terilyn (2), terry.son (2), Tesloco (2), testcase2014 (2), teutone (2), tgcha3 (2), tguiot (2), thalloc712 (2), thandley (2), thaneofcawdor (2), the\_highlander (2), The\_Italian\_Goat (2), thealakazam (2), TheAlternator (2), theantiagonist (2), thecanadiannerd (2), thecool (2), TheFirst (2), theforgivenone (2), TheGrinch (2), TheHoge (2), TheKnowledgeAddict (2), TheLastBanditto (2), thelastpirate (2), themisanthrope (2), theo.th (2), theogen (2), theotis (2), therant (2), Therkaz (2), TheSteelBagel (2), thevirtual (2), thewamurrays (2), thiagot (2), ThoseSeeminglySimple (2), ThoughtTraveler (2), thriftyshane (2), thyj456 (2), tian6415 (2), tical90 (2), tickledrip (2), tiffany (2), tikitan (2), timm (2), timotapu (2), timotheus (2), Timothy78 (2), tipsledude (2), tissy (2), tiwila (2), tjuwwf (2), tkandpf32 (2), tkd1022 (2), tkfka3406 (2), tkm01b (2), tlfskxm (2), tm01 (2), Tmfark (2), tmptmp89 (2), toey279 (2), togaparty27 (2), tolkier (2), tom0401 (2), tom4654 (2), tomberek (2), tomdpike (2), tomi2307 (2), Tomih (2), tomyjack2001 (2), tonamel (2), tonytesting (2), tooley9 (2), topograph (2), tored (2), torichamp (2), torileigh07 (2), toropg9777 (2), tragicmacpad (2), travisrthompson (2), treble (2), trenton95 (2), treymix (2), trinaweiland (2), Tristacular (2), trivium6 (2), troutm16 (2), truth (2), tryinglobster (2), tugrazsucks (2), tumolog (2), Turetzky (2), tutti (2), TuurDutoit (2), twestin (2), twf (2), twightman (2), twinks54 (2), twt3828 (2), tyler29033 (2), TylerHeldreth (2), tyna131 (2), tyomadoc (2), ubiquitous (2), uhvl (2), uiviin (2), ummm (2), unaverse88 (2), ungzd (2), unhingedinsanity (2), unolava (2), ur4 (2), uru (2), usiRev (2), usx303 (2), vache (2), Valar\_Morghulis (2), valdir (2), vanbussed (2), vanilla7 (2), vashtsakared (2), vasikin1 (2), vaskalho (2), veenuadi (2), Veers (2), vegabrigitte (2), veles (2), velsatan (2), venture2183 (2), veraca (2), Verax (2), veritasveritatis (2), veronicawen (2), verz3 (2), Vestaroid (2), vestkot (2), vgurl13 (2), viblee (2), vice (2), vickip (2), victorlp (2), vinniebrazelton (2), virp (2), virtualritz (2), vitality (2), vitalityv (2), Vitty (2), vmontoya (2), void (2), voloprodigo (2), VooDoo (2), vrhm (2), vrome\_zak (2), vuk1954 (2), walker (2), warrenbisch (2), wave88 (2), wavygravy (2), Weakling (2), Welf (2), weltgeist (2), Wendolin (2), wendythiel (2), WengK (2), Westi\_Peggy (2), WhatchaMeanDopamine (2), whdmlgus12 (2), whdmsskal (2), whdntjr147 (2), whisperer (2), whitefang3927 (2), whlterhino (2), Wholefruits (2), wilandlane (2), William\_Broughton (2), Williams46 (2), WillySong (2), Windowlicker (2), Windsocks (2), wink (2), wireplus (2), wiszun (2), withballad (2), wjdehdtdjq123 (2), wjdgs1224 (2), wjyunjung (2), wkddbsgn21 (2), wkdwlsqml35 (2), wldbs0281 (2), wldms6364 (2), wnqlszoq123 (2), Wobbins (2), wogur (2), wojtak (2), wolfy1379 (2), Wondersoap (2), woodkit (2), woovnia (2), worloff (2), wrathskeller (2), wtl-roach (2), wyangy (2), wz7w (2), Xandawesome (2), xandy (2), xAshyr (2), xavierau (2), xavras (2), xBIGGSx2 (2), xBlackOpticsx (2), xccards01 (2), Xcelsior (2), xChocoTeddy (2), xegil (2), xenon54xenon54 (2), xexiter (2), Xhadius (2), xlfkalt (2), xliz (2), xogus1689 (2), xtine827 (2), xVolQx (2), xxjoanxx (2), Xydron5 (2), yauyau (2), yayme (2), yeckil (2), Yes (2), YIHSIN (2), yimei (2), ylefranc (2), yleungy (2), yodax (2), Yohun (2), yoon.harry

(2), yoonjs1103 (2), yoshiro (2), yothegamer (2), youli674 (2), youngddos (2), Yousername (2), Yulrath (2), yumyum (2), yunheyu (2), yunlee (2), YuraSolovey (2), yuuko (2), yxorp (2), z-train (2), zacharysyoung (2), zachgerhard (2), Zako (2), zalethon (2), zamboch (2), zapt (2), Zazulitao (2), zboivin (2), zcampbell24 (2), zector09 (2), zeep-sop999 (2), zeik (2), zero (2), zeroclub (2), ZHANGERZ (2), zhangmian (2), zhen0428 (2), zhh029 (2), zibnzibn (2), zifas (2), zippy (2), ziska (2), ziziry (2), zjc1221 (2), zlzlvndtjs (2), zodiac\_xeno (2), ZoeVulpez (2), zoki59 (2), zolatar (2), zombiekings (2), zotikov45 (2), zoxvvoz (2), zrowny (2), Zyzon (2), zzzx (2), \_root (1), \_rorschach (1), \_zoe.t (1), .Dave (1), 0 (1), 00side00 (1), 0330hojin (1), 0909lily (1), 09rene09 (1), 1004heeru (1), 1017dbox (1), 1028868029 (1), 1031107909 (1), 1051073031 (1), 1051601552 (1), 1095157867 (1), 12345672 (1), 123epit (1), 1307317 (1), 1367348 (1), 14jdelap (1), Icaribou (1), 1q2w3e4r (1), 1q46ho (1), 2017rvenkete (1), 2017spradeep (1), 327327327 (1), 3fishes (1), 404\_Error (1), 454551515441541 (1), 50jerome50 (1), 5121051210 (1), 5too (1), 7tomms (1), 821036682627 (1), 832689 (1), 87andrewh (1), 8delta8 (1), 923 (1), a\_reis (1), a2guardian (1), a544jh (1), a5815802 (1), a7h3na (1), a8k (1), aadum (1), aam\_at (1), aardvarkmai (1), Aaron\_H (1), aaronshifman (1), abdullah\_Sedici (1), abdullhady (1), abejim (1), abhishekbanyal (1), abhishekchakraborty (1), abiklmuk (1), abkline (1), abrad (1), acatherine1 (1), accioseobaby (1), Achun2 (1), acorn88 (1), acornell (1), acriley (1), ad88 (1), adachan111 (1), adalene (1), adam13579246 (1), adamainslie (1), Adicakepants (1), adigregz (1), Admiral.Snackbar318 (1), adoos (1), Adriana\_Snow (1), aelis (1), AereGloria (1), aethalia (1), afishknit (1), agathaoliveira (1), Aggie666 (1), agkas (1), Agnieszka1968 (1), agoyal (1), ahalliwell (1), ahmdtezcana (1), ahoymmin (1), ainat886 (1), airfleet (1), Aisouda (1), ajnamav12 (1), ajtechie (1), Akatrosch (1), akimael (1), akwilla (1), alafif1993 (1), alanc (1), alcene (1), aldenb (1), aleida (1), aleksja (1), alex\_sparrow (1), alex5677 (1), alex777 (1), alexamio (1), Alexander\_Klinkner (1), AlexandriaBrooks (1), AlexeyWOC (1), alexkapp (1), alexkwon (1), AlexPsyduck (1), alexto300961 (1), AlexYongdzin (1), alfavita (1), alfredlee2005 (1), AlienAli (1), alikishk (1), Alimenkov (1), alisha (1), ALLEMOmomemo (1), allenjiang (1), allers\_and\_oranges (1), allomo (1), almcg123 (1), almutheinz (1), alrascala (1), alsrnjs419 (1), altovista50b (1), altu (1), alyghieri (1), Alyse (1), amacc6632 (1), amandabluezzz (1), AmaraleZ (1), ambcha (1), Amberma (1), amcl (1), amcrd (1), amfumero (1), amika1999 (1), amortveit (1), amos (1), amprox (1), amunoz1 (1), amurica1822 (1), amy.roepke (1), amyhelle09 (1), amykinshay (1), amylase89 (1), anachronismic (1), anahana (1), anais (1), AnastasiaNatrova (1), anatik (1), ancho1012 (1), and7sosa (1), andra29 (1), andre.rola.1602 (1), andrea9727 (1), andreadeleong (1), andrew11111 (1), andrewcol (1), andrewgark (1), andrewnagy92 (1), andrys (1), andtrix (1), Andy\_Pell (1), andydz (1), aneld33 (1), angel.v (1), angela74 (1), angelpause00 (1), angler.korea (1), angypancreas47 (1), anguyenshs (1), anke (1), anki145 (1), annabelle8 (1), annakp (1), annaleigha (1), AnneReiss (1), anneso4000 (1), annett (1), anpak (1), ant020806 (1), AnthonyO828 (1), antony (1), antwan\_barca (1), Aoide (1), aoiffee\_ (1), aoikiwi (1), aovivo (1), ap5636 (1), aparikh (1), aperosdklaj (1), apick8 (1), AppleCider66g (1), APUHA (1), aputre (1), aragau101 (1), ARandom (1), arcbeetle22 (1), arcnolem (1), ari83 (1), arikele (1), Arinelle (1), arloandallo (1), Armadillo3001 (1), armandoagra (1), arnaudbarre (1), Arosales (1), Arpit\_1892 (1), art4sale1990 (1), artem\_a85 (1), Artem90 (1), artemiea (1), artenza (1), Arturro (1), arwin (1), aryann2122 (1), asart (1), asasdgrdh (1), asdfasf (1), ASDS1234321 (1), ASH6666 (1), ashwant (1), asia.rudzielec (1), asian42 (1), Asika (1), asing89 (1), assaddandashi17 (1), astaferay (1), asteroid0928 (1), astro2 (1), astrocyte (1), asuckling8 (1), aswedf12 (1), atablash (1), athanasia96 (1), athusi (1), ATLASaim (1), ATpower (1), AttackHumanz (1), audacior (1), austin366 (1), avastms (1), averyl (1), aviatorgiraffe (1), avibhuti (1), avindy (1), avolver (1), Awaay (1), Awesome\_Man1987 (1), Awesomfazekas (1), awesomesha (1), awhitem1 (1), aws2680 (1), axonrex (1), AydenLee (1), AymericPM (1), aywire (1), b\_gontang (1), bacon\_doge (1), baedaenthu (1), bagyoface (1), bahbuu (1), balaan (1), Balmer (1), Balumpabumpa (1), banjam (1), barackobama (1), barbie\_girl323 (1), bardgodo (1), Baroreidda (1), barryroennfeldtesq03 (1), Barschti (1), barszcz88 (1), bassistj (1), bassplayer4 (1), bastiaan (1), Batildo (1), bauracco (1), baxtermagnus (1), Bb5415 (1), BBaSe (1), bbennett (1), bbick34 (1), bbrewermn (1), bcatt (1), bcb1011 (1), beanban7 (1), beautyseeker (1), BeckyV (1), bedwell09 (1), bellasophiagirl (1), bellinhacapilla (1), belz (1), bembellebee8 (1), ben.vermaercke (1), Ben.z. (1), ben16430 (1), benfish (1), benithebagelboy (1), benjamininspiration (1), benjamn (1), bensaccount (1), berend (1), berkut (1), bestbro21 (1), bethanyjohnson (1), bethlee246 (1), Betul2013 (1), bhbyf (1), big\_sasquatch (1), biggmike45 (1), bigpappa (1), Bigredobie (1), bigtimsb (1), billderwent (1), billyhee (1), binjo (1), biomatti2 (1), biomed47 (1), Biorez (1), birat33 (1), birkoffb18 (1), bismarck (1), bjlee (1), bjleeper (1), Bkmz (1), bkyee (1), blackace514 (1), blackbat (1), blacklite (1), blacksplash (1), BlackTempest (1), BladesRUS (1), blak320 (1), blakshadow82 (1), blockmock (1), Bloco (1), blow85 (1), BlsckRedWhiteGirl (1), blud (1), bluecyy (1), BlueEyedBandit (1), bluef1sh (1), bluehjh (1), blueotterkitty (1), BlueOwl (1), bluer78 (1), blueraider (1), bmac (1), bnc100 (1), bndarendeli (1), bnikodym (1), bnooroo

(1), bobtwc (1), BODY (1), boerne (1), boghi13 (1), bogs714 (1), bombbook (1), bomgirin (1), Bong (1), boom1512 (1), boorat (1), Boorg (1), borichocobo (1), borisme (1), bort269 (1), bosu (1), bowden (1), Boxclocke (1), bpluce (1), br4nd (1), bradenh (1), bradleyuffner (1), bradyjackson (1), braij (1), brain97 (1), Brainer157 (1), brainfrog (1), brainitchy (1), BrainMapper99 (1), braintease (1), BrainWave117 (1), brainythebrain (1), Brami (1), brandonkirklen (1), brantheffin (1), breiter (1), Breitreitz (1), brekgray44 (1), bremiller (1), bremoore999 (1), brendan7 (1), brescialu (1), brian9704 (1), brianb19 (1), brianchirls (1), bridgetmatson (1), brieser (1), brightlikestars (1), brocawernicke (1), brokenstride (1), brookeg3 (1), brooxie11 (1), brunoafc (1), Brussell415 (1), brwneyegr1549 (1), Bryan\_R.Davis (1), bryanwithaby (1), bsgreentea (1), bsorensen22 (1), bti (1), btingley (1), buddyjaymac (1), bugaloo102 (1), bughunter (1), bullfrog519 (1), bumperkim (1), bwink123 (1), bynoodles (1), byronaaa (1), C.S.L (1), ca8006 (1), cabey4 (1), Cablab123 (1), cacachat (1), cadbury (1), caeleste (1), caelum53 (1), caesaraj (1), Cakes1234 (1), calebz123 (1), Caleneth (1), calgeekgrl (1), callmeyesh (1), calmeb (1), CalvinANelson (1), calvinbah (1), calzone7 (1), camillerimmer (1), Cammyd (1), camojp13 (1), camp0521 (1), campgrl (1), campioni32 (1), canigol (1), canogj (1), capnbakes (1), captainmeese (1), Carl2002 (1), Carnifex (1), caro\_blanche (1), carolc (1), carpamea (1), carpes (1), Carpetbunny (1), carriemaxy (1), cashewmary (1), caspell (1), casperOne (1), cassvi (1), casualboy (1), CatHawk (1), catherinecp (1), catla (1), catskul (1), cavortingogre (1), cawffle313 (1), cbk5242 (1), cbquaden (1), cbridger (1), ccc020 (1), ccy (1), ce59415 (1), Cecefoo (1), Cellogic (1), centein (1), cerchie1 (1), cesar.berrios (1), CFB\_ (1), cferrigno13 (1), cfs516 (1), cgdynamic (1), cgunn (1), cgwuyy (1), ChallenWright (1), charleskurtz (1), Charlesw420 (1), Charlieboy (1), CharlieLert (1), charlottem (1), charly (1), chas675901 (1), chasejena (1), chaz (1), cheeksnaill (1), cheese250 (1), chelmi (1), chemisawesome (1), cheongibeom (1), CherBear (1), Chernook (1), cherry114 (1), cheytac (1), chilove03 (1), chil304 (1), childsun0323 (1), chimmerson4 (1), ChinosRocker (1), chipmunker (1), chiyaura (1), chlafi (1), chloekime (1), chocolatez (1), choce (1), choi147849naver. (1), cholivas (1), chorgan4498 (1), chpark (1), chrischris1080 (1), ChrisGirs (1), ChrisRoyal11 (1), chrissyman (1), chisticaceres (1), christinae (1), christine257 (1), christophermiles9 (1), christos (1), chrstos (1), chuckdizzle (1), chunter282 (1), Chwanni (1), ciaran (1), ciorowit (1), cilee (1), cinnamon510 (1), circuitfox (1), ciscampos (1), cisvhat (1), cjhmidt1494 (1), cjet (1), ckdkarla (1), cl10Greg (1), cl5888a (1), clare13 (1), clarky\_4 (1), cleetric (1), clemt\_d (1), cleopad5 (1), cliddings (1), climbguru (1), clintbush (1), cloppy (1), closeyes (1), cloverkenz (1), clowd (1), cluelessblues (1), cmanolakis (1), cmriposo1323 (1), cmyk3000 (1), cnrrn9640 (1), coalkeshi (1), Cobraman202 (1), cockulus (1), codemonky (1), CodyTipping (1), comi258 (1), ComputerWizKid54 (1), comradecannon (1), conorwhodatcurry (1), conzoooma (1), CoolBrain1234 (1), coolfool182 (1), coolibongo (1), Core2Man (1), corrinnersussell (1), Corrus (1), cortesimone (1), Corvin (1), CosmicV (1), cosminrsi (1), counterboom (1), couple2193 (1), coyotesage (1), coz7187 (1), cp1 (1), cr4sh (1), crampstyle (1), CrashEmBee (1), Crasz (1), crazymexican (1), Creative\_K (1), cristalann (1), cristobaljafer (1), CRUKCitSci (1), Crystalk348 (1), cscanlon23 (1), cu\_mu\_lu\_s (1), cuans (1), Cubbie54346 (1), cubegame3d (1), Cuddlepie (1), curka (1), curlywurly (1), Curtnos (1), CuSO4 (1), CuteKitten (1), cv1t (1), cwilson2019 (1), cwsojourner (1), cybercying (1), CyberKasumi (1), Cyp (1), cypher\_lord01 (1), cypof (1), cyricadon (1), czubfsaudf (1), d0ngjea (1), d1deta (1), D4RKS0UL23 (1), daehrettop (1), daenarahd (1), Dahal (1), daisy75 (1), dakk (1), dalec (1), dalmyday (1), dalyw (1), DaMastaOfChaos (1), damive (1), dan595 (1), dani3i\_ (1), DaniBicknell (1), daniel\_lee\_95 (1), Daniela33 (1), danieljharri (1), danielmunro (1), DanielOlivera (1), danielpavlov (1), dannycp6 (1), dannypohara (1), dansilber01 (1), Daria1 (1), DarkElysiumXL (1), darkrsing (1), dasago (1), dasangrypanda (1), dashbeep (1), dasternberg (1), Dat\_Coffee (1), Database (1), Datensammler (1), dauntless (1), dave\_b369 (1), dave86.46 (1), davenjen99 (1), david511 (1), davidcon (1), davidhelgason (1), dawnofnowhere (1), dayamayii (1), dbarthelmes (1), dbsqltmf123 (1), dbsseo (1), dbstn1234 (1), dbyeold745 (1), dchoco (1), ddd6012004 (1), ddemmmkimm (1), ddewerg (1), Ddfaist (1), ddrinka (1), ddxacceleration (1), dead\_eye (1), dead\_l (1), dearscsc (1), DeathJAVU (1), deboramismetti (1), deffers (1), Defrag (1), deja (1), DELETED (1), delrio (1), dem12 (1), demeny (1), demitricollins (1), demix9881 (1), dems (1), denisemcse (1), deniz308 (1), dennis976 (1), Dennis99 (1), DerekW (1), derflo1110 (1), derisha (1), Derkant (1), derpnator (1), desertray (1), designbyrazor (1), Detra (1), developeruk (1), devilcn (1), Devin\_M (1), devpony (1), dewmath (1), dfordeft (1), dgales4130 (1), DHCP (1), dhdlajrkw00 (1), dhnelson (1), dhobsd (1), diablogato (1), dianamation (1), diegomunozochoa (1), Diegoolea (1), diet\_cola (1), Dievan (1), Dillscar (1), dimitris7s (1), Dinglefish (1), dipsao (1), diptick (1), dirtballny (1), Disciple\_of\_now (1), dizzezboy (1), dizzydman (1), Dizzydy01 (1), dja912 (1), dkzink (1), dlahfh12 (1), dlehqp (1), dlgrkfo369 (1), dlpy (1), dltnw1425 (1), dlwltmskdlxm (1), Dmetry (1), dmswn9438 (1), dnwnvkrhl (1), docj12 (1), doctordub (1), doctorfromblebottom (1), dod (1), dohyun9412 (1), DoktorSK (1), dollar\_fries (1), domciviello (1), domisol (1), don\_turron (1), dongas79 (1), dongguri1983 (1),

donmoritzio (1), donnapuff (1), dontfwhitme (1), dorantbb (1), Doreo (1), dottedduck (1), Doug5212 (1), dougdoug (1), douglas\_silva (1), dounghun22 (1), dp317 (1), dpereiras (1), dpmattingly (1), dpqqqp (1), dpri14 (1), dpvpp (1), Dr3000 (1), dracodiem (1), dragan118 (1), dragon53535 (1), dragonacid16 (1), Dragoneex (1), dragos2k7 (1), drax427 (1), dream\_state (1), drgath (1), DrNeo (1), DrNic (1), droqen (1), drosmond (1), drydragon (1), ds000 (1), ds5giy (1), dsimps (1), dsprinzen (1), dss902 (1), dsum1 (1), dubravka (1), duch (1), Dude3004a (1), dudtn3346 (1), Duffles22 (1), durahan4 (1), dus5325 (1), dushmsr (1), dustinfunk (1), duvallairplaneboyatg (1), dvizauskas (1), dwarfapple (1), dwood9998 (1), dwthyuk (1), dydwls1021 (1), dylanfv (1), dysrosium (1), dzhuris (1), e\_cyril (1), E\_STEIBL (1), eal-barran11 (1), eardius (1), eastvash86 (1), EatMyPlatypus12 (1), eboy00 (1), Eccelino (1), ecklesweb (1), Eclipse8468 (1), EctoBiologist (1), edakos20 (1), edcambet (1), eddhensley (1), EddieBatskull (1), eddiesunder (1), edera (1), EdisonFilho (1), edmund. (1), edogbrownbear (1), edsherer (1), Edward\_Knave (1), edward2 (1), edweard (1), eehlise (1), EEV (1), eezio0624 (1), efieszet (1), Efren (1), egle (1), eileenh (1), eilie (1), einsteinunicorn (1), eis271828 (1), eiwellman (1), ejackw3rd (1), ejb4545 (1), ejprado (1), EJson4 (1), ejutzi (1), elaineanderic (1), elbeaton (1), electrohan (1), eleep (1), elhoucine (1), eliena (1), eliensign (1), elijiss (1), elikabeth (1), eliseann (1), elisec7 (1), elliela (1), elliot7359 (1), elow (1), Elrond (1), elsbeth (1), eltf (1), elyssap (1), emaildenny (1), emanruss (1), eme1 (1), Emery-Jade (1), EmilyStewart (1), emmanuelfaure (1), EmmEl (1), emradin (1), Endernyans (1), endorphinlust (1), Enid (1), eniteris (1), enjelos (1), enki1729 (1), entropy666 (1), eoin\_o\_sullivan (1), Eorlingas230 (1), eratem (1), Erbem (1), ercxoxo (1), ereve (1), eric007 (1), eric172 (1), ericab (1), ericaq (1), eridiath (1), erikalsessions (1), erikandrew (1), erikopsa (1), erinyun (1), erk12 (1), erolcherim54 (1), eromeo (1), erpawer1 (1), errorr (1), erstwhileiii (1), ErwinHetz (1), esbrown (1), escherichia (1), eskimoe87 (1), essaibee (1), EstefyNunez (1), Estep1323 (1), etalisman (1), eternal-frame (1), etherealzephyr (1), ETShift (1), eunho73 (1), evabazerker (1), evan\_roberts (1), EvanAcree (1), evanxd2000 (1), everest123 (1), everettmattila (1), evillasr (1), EvilSeaDragon (1), eviltomb (1), evirtual (1), Evrae (1), ewestein (1), ewulff (1), Exhizor (1), Exodanify (1), Explosive (1), Espresso (1), eyalroz (1), eyecatcher (1), eyefreddy (1), eyetooth22 (1), eyewire.awesomeness (1), eyewireid777 (1), eymin (1), Ezares (1), eztrap (1), f1664013 (1), f2w17 (1), fabag (1), fabianr (1), fabpanda (1), Fad (1), faithfind (1), faithg (1), falcomatto94 (1), fands (1), fatim (1), favrage (1), fazed343 (1), fbern (1), fcps (1), fdsa2526 (1), fealoro (1), fearthecrysis (1), feba (1), Felix62600 (1), fellipe (1), fencer94 (1), fencingmom (1), FerChaconH (1), fercorreia (1), fergbyrne (1), fernand0andrade (1), Ferwolf13 (1), Feuerwehr54 (1), fever204 (1), ffb65 (1), ffemtrock (1), ffpohren (1), fiasch (1), fiercekittykat (1), Filargon (1), filipecosta (1), filmart (1), Fim (1), FinderX (1), findingdorrie (1), fine (1), FionaW. (1), fonte (1), fiothehuman (1), fire\_breather (1), firlej (1), firstdied (1), fishncustard (1), fitso (1), FlameCoding (1), flingyding (1), Floflahrlyleay-lamorn (1), Flood\_of\_SYNs (1), fluffy (1), flybye22 (1), flynntaylor (1), flzhong (1), fma1517 (1), food6209 (1), Foodmanchew (1), forcelightning (1), ForestTinker (1), formans (1), formula\_410 (1), forpks (1), fortbaba (1), forwhom (1), fory (1), fougou564 (1), Fourys (1), Fouzt (1), FP5000 (1), fra.gal (1), fragoje (1), Frances\_Gorka (1), frangavita (1), frankdill (1), Franzis (1), frattman (1), FreakDevice (1), freejung (1), freesoul12345 (1), frenki (1), frentoor (1), frostmind (1), frothy (1), fthomas (1), fudge (1), fukumura\_mizuki (1), funinthesun187 (1), funk915 (1), funkycold (1), funkymelmomkey (1), futureboy (1), Fwanswa (1), Fylgja (1), g\_gambetti (1), g\_the\_enemy (1), gaber (1), gabbers18 (1), gabe05 (1), gabi91120 (1), gabou (1), gabriel\_G12 fla (1), Gaggo (1), galarun2 (1), galundin (1), game\_01 (1), game15150 (1), gandhi309 (1), ganum.ra (1), gaon\_s2 (1), garagescientist (1), garypeterson (1), garysedgwick (1), gatesmaryjo (1), gauteamus (1), Gavs (1), gazzza25 (1), gbrainerd (1), gearashi (1), gebauer (1), geegee (1), GeegMofa (1), geneoreilly (1), genie99 (1), Genn16 (1), GentlewomanMN (1), George\_McNarney (1), georgezgf (1), georgiabiker (1), geralevitskii (1), gerrywjh (1), Gesster (1), gezzika (1), GFani (1), ggggg (1), gguerre (1), ghj3815 (1), Ghostychan (1), ghyo1002 (1), gibran123 (1), giffitor (1), Gig77 (1), gigi971 (1), gilbertdc07 (1), Ginnywood (1), giulianas (1), Gjx (1), gkfkfd1004 (1), glambany (1), glife934 (1), glillviva (1), Glitchburger (1), glittergirl87 (1), globox85 (1), gmana11 (1), gmgunn (1), Gmoney (1), gniorf (1), Gnome. (1), gnosis (1), GOA\_JKa (1), goalkeeper23 (1), goclarke (1), gogo (1), gokovas (1), goldfishcrackers (1), GoldFishLoveSLG (1), golightlyone (1), goodnightbluemoon (1), goodtotheeye (1), gorilaamarelo (1), gorkapesa (1), Gorski\_Song (1), gosbor (1), Gospodin-Michail (1), gozteli (1), GPelovitz (1), gpwebber (1), grabi (1), Grackir (1), grahame (1), grande74 (1), grangerzone (1), grark (1), Gray001 (1), greatrock (1), greenTetrahedron (1), gremarlop (1), gremlonz (1), greyno03 (1), grgsiberia (1), grillet (1), GrimReaper\_Stash (1), gsantostasi (1), gsk (1), GT\_22 (1), gtgt853 (1), guaranira (1), GuchMAN (1), guerlany (1), guicor (1), gun (1), gundalpha (1), gunnar (1), gurapa (1), guri (1), gustatory (1), gustavek (1), gutomumu (1), guverde (1), gvnech (1), gvgriffin (1), h430613 (1), h4b0 (1), HACKER1993 (1), haekaru (1), Haku (1), halcyone (1), halim (1), hallo (1), Hamiltons3 (1), han54001 (1), HandgunYoga (1), Hani (1), hansen (1), happi (1),

happyc (1), happymallow11 (1), Harrypooterluvr23135 (1), hateful\_blue (1), hawkeye (1), Hawkeye59 (1), hay20002 (1), Hazamoo (1), Hc (1), hch3203 (1), hchestler (1), hckjk071012 (1), hdformat (1), HeatherLL (1), heatherlynn97 (1), heathro313 (1), hedgey578 (1), heeae0502 (1), Heejin (1), heidikmck (1), heime033 (1), helenm33 (1), helgarth (1), Heliarcone (1), helifreak (1), hello2 (1), helmutbl (1), hemateu (1), hendy (1), henryou (1), heroriise (1), heroye-jinp (1), heybuddy (1), heydude (1), HHMI (1), HiddenGhost14 (1), hiiambob (1), hilee117 (1), hiltona (1), hips2 (1), hiroyuki84 (1), hittmanbeast (1), hjbretton (1), hjo6796 (1), hknho321 (1), hl13rocks (1), hlapurocciel (1), hleker (1), Hokage (1), Holiday (1), hollybee (1), holylight29 (1), honbiojli (1), hongkyukim (1), hongsi (1), hophead27 (1), hoppetosse (1), horang210a (1), hoseong (1), houngan (1), hoverbeast (1), howmanyapples (1), hoyakim (1), hpug-hazhendi (1), hr0m (1), HSF (1), hsummers17 (1), hswto (1), hubj0rn (1), hudyvolt (1), Hugobmu (1), huilaiming (1), hullodude (1), humanat33 (1), hunnyade (1), Hurricanelove (1), husam132 (1), huypro1998 (1), hwan\_jun (1), hwifaram (1), hychy (1), hyojun0301 (1), hyoseok89 (1), hzq.fox (1), i2015 (1), I4444 (1), iam1105 (1), iandawg6 (1), ibbyg (1), iblis (1), ibronsveld (1), ibuyuker (1), icarian (1), ice912 (1), icetype56 (1), idpwidpw (1), iEqua (1), Ignacius (1), ignaty8 (1), ih0327 (1), iheartscience (1), iimp01 (1), ikaika (1), il\_manto (1), ilikehowulook (1), il-luminati (1), Im\_Kid\_A (1), imagnate (1), Imipak (1), incessantlunacy (1), Inconclusive (1), ingamy (1), ininush (1), inout82 (1), Inseology (1), intelekt (1), interlock (1), Interneuron (1), intrapostal (1), inugaijin (1), inzona88 (1), iodiedes (1), iolivier (1), Iria (1), ironstamp (1), irvi (1), isabwilkinson (1), IsaiahJ13 (1), Its\_just\_angel (1), itwas-ntme (1), Ivan\_Fiorino (1), ivan361 (1), ivanmihov (1), ivonalesk (1), ivypuppy (1), iwannabesmart (1), izabelshen (1), izenze (1), j\_zy28 (1), J03KICKAS5 (1), ja (1), JAC545 (1), Jackalts (1), Jackcav (1), jackg (1), Jacklovesariot (1), jacknhudson (1), jackrobinson12 (1), jackrobinson95 (1), Jacksierp (1), jacksparrow118 (1), jackterbutler (1), jacob5 (1), jacobawolf (1), jad34 (1), jadams11 (1), Jadobi (1), jaelma24 (1), jaex (1), jafri.b17 (1), jagmuse (1), jajrlgr (1), jake1996 (1), Jakemonsta (1), James\_Bottomjaw\_III (1), jamesd3 (1), Jamesx (1), jamiel (1), jammin123 (1), jammin995 (1), janelee79 (1), janethshepherd (1), jang4291 (1), jangelgdl (1), jangeroo (1), Janko (1), janp (1), jarholma (1), jash042 (1), jasmine13 (1), jasmineanaya (1), jatinpunia (1), jatnieks (1), javisantonja (1), jawthis (1), jaybest (1), jaynabonne (1), JayTang (1), JayWire09 (1), jbnjjin (1), jbotsch (1), jcaselman (1), jchandler (1), jchangstrom (1), jcpz23 (1), jcstudios (1), jcuppens (1), jdavis001 (1), jdco777 (1), jdramise (1), jdrennen (1), jea7039 (1), jeacyyj (1), jean.cazes (1), jeanbean (1), jeangreen (1), jef\_f (1), jeffdooley86 (1), jefflu (1), Jefq (1), jejeueeeee (1), jenabana (1), JenniferCM (1), jennifermayo (1), Jennster1357 (1), JerseyRoyal1805 (1), jesscano (1), JESSE251 (1), jessechase (1), jessica.guglielmino (1), JessicaChen (1), jessierose (1), jetkin (1), jewelz (1), jfyoo0209 (1), jgoot (1), jgp001 (1), jhakchung (1), jhayes2020 (1), jhcho96 (1), jhhwang (1), jhoypd (1), jiggabite (1), Jigglypuffisabro (1), jimbez (1), jimcasteleiro (1), jimi1967 (1), jimmuller (1), jimmy\_jazz (1), jimmyjam97 (1), jimschim (1), jinjaese (1), jinyrong77 (1), jjang1661 (1), jjfranzen (1), jjkoshane (1), jjthealphamale (1), jjunlee (1), jjw1243 (1), jkbeen (1), jkeegstra (1), jlecren (1), jmorrisradius (1), jmpalevsky (1), jms2544 (1), jmt0821 (1), jnhwkim (1), joaniegirl (1), Joanne\_Sinclair (1), jocelynbraddell (1), joe1002 (1), JoeGosse (1), joeinator (1), joerolil (1), joesso (1), joey12233 (1), joeyjo0 (1), johannes919 (1), john\_fini (1), JohnF (1), johnhanna (1), johnleary85 (1), johnviolino92533 (1), jojan (1), jones152 (1), Jonkh (1), jonsothin (1), jontabaco (1), jontti (1), joohyung0121 (1), jop1989 (1), jordanm95 (1), jordi\_mas (1), jorik (1), joscua (1), jose1212 (1), joseluisbossio (1), josferbue (1), joshuahawk45 (1), josiahjames (1), Josnius (1), joye (1), jp535 (1), jpenzer (1), jpg928 (1), jplaj (1), jpmrtn (1), jr637 (1), jra (1), jrahn (1), jrfignewton (1), jrocha (1), jrolands (1), jross34 (1), jryan033 (1), jsae9635 (1), jschott5 (1), jsmidt (1), jstrode (1), jtagett (1), JTD95 (1), jtrijones (1), juancamore01 (1), juanfuentes (1), juanL\_A (1), JudySmith (1), Juicy\_Piano (1), juja (1), jukzi (1), julgori (1), Juli199696 (1), Juliane3 (1), JulianK (1), juliaping (1), juliar (1), JulieBarron84 (1), julieguillot (1), julien2412 (1), juliusmaximus (1), Jultsuq (1), Jumpeks (1), jungbdr (1), junhui (1), junhyunnn (1), junivers (1), junkwon05 (1), justchris (1), jwalters (1), jwhostet (1), jyb9828 (1), Jyl (1), jzarach (1), k13142022 (1), k3gern (1), k3ilyn (1), ka (1), kaat (1), kacek (1), kadang (1), kadkins223 (1), kadri (1), kaenplan (1), Kaibudd (1), kailas (1), kailynbm (1), kain20002 (1), KAIROO (1), kaisersuzuki (1), Kalien (1), kamilas2bill (1), kampo (1), kanan\_18 (1), kandelinsky (1), kangdol504 (1), kardots (1), Karkat413 (1), karthikml (1), kartikangara (1), kash6429 (1), KaspraManSK (1), Kassandra\_moon (1), kat22 (1), katarzyna.m.zolna (1), KateLee (1), katertotlol (1), kathykate (1), katieemalone (1), KatrinaX (1), Katrintrololo (1), katunch (1), katus (1), kazimir (1), kazimoto (1), kbergeson (1), kbock (1), kbrentano (1), kbrewster (1), kbug (1), KDangelo (1), kdbrought (1), kealex2 (1), keber (1), keissenmind (1), keithpeanut (1), kelly99324 (1), kelsxx0 (1), kemalettin (1), kenan07 (1), Kendra (1), kenziemac5392 (1), Kerly (1), kerri9494 (1), kerryelizabeth (1), kevelot (1), Kevinho (1), KevinL (1), kevinpadilla562 (1), kevlar90 (1), Kevonni2 (1), kgh2205 (1), kgks0117 (1), kgriffith (1), khardesty (1), Khavaki (1), khs050314 (1), kijh17820 (1), kilgrim (1), KilingField (1), killday (1),



killedkenny (1), Killflies (1), Kilroy (1), Kimia\_Shahrieh (1), kimjinuk (1), kimmyras (1), kimsh1004 (1), KINGJERF (1), kinkurek (1), Kirisame (1), Kitten95 (1), Kiwi3102 (1), kksnino (1), klane82 (1), klarashadow (1), klata (1), KlaudiaUrbanowicz (1), klehman03 (1), kleinehexe (1), kleopatra3 (1), klevison (1), klimborg (1), klivan (1), klom445 (1), kmg369 (1), KMJ (1), Kmpisces (1), kngfu (1), knifty (1), knightsteampunk (1), knr\_869 (1), koala\_force (1), koalk (1), koc89o (1), kodiak713 (1), koh0923 (1), kokoloko98 (1), kokopiko (1), Kolpo (1), komangj (1), komirr (1), korea7047 (1), koreastar (1), kormeo53 (1), korper (1), korzeniesia (1), KoTs (1), kpearson (1), Kraigen (1), Kreotak (1), kristin11 (1), kroushl (1), kryshth (1), kseligson (1), ks9977 (1), kskim59 (1), kswartz (1), kuhlenhopp (1), kuniacke (1), KURAA (1), kurenan (1), kuter (1), kw7870 (1), kwp123 (1), kye319 (1), kyh5059 (1), kyk9023 (1), kyleliameyre (1), kyleo136 (1), kylersmith7 (1), kylie1457 (1), kynos (1), Kyoucobo (1), kzttz5 (1), l0staddicti0n (1), L544 (1), lafemme13 (1), Laff1 (1), LaHaxors (1), lakshmi (1), lancast (1), Lankeeper (1), lapellegrina40 (1), LariDimbulah (1), larsboth (1), larsonmikaela (1), larwick (1), laura14 (1), laurazeng (1), laurenbollin (1), LaurenHart (1), lauriea (1), laurieleeconyers (1), LazyEyeGuy (1), lazyluke26 (1), Lballinger (1), lbender (1), lcf12 (1), lcoulter (1), ldcsvan (1), ldcsove (1), ldg1103 (1), leahann (1), lechrist81 (1), lecorbu (1), leejw0822 (1), lefty (1), LegendLukas (1), leighsspace (1), leiterup (1), lemonlis (1), lemonsandwich (1), Lenago (1), lenapewpew (1), lenath (1), lenkabenka (1), lenorajl (1), leonpalafox (1), lewcifer (1), Lexolordan (1), lghube (1), lgriner (1), lhl1561 (1), liam.nomed (1), liamrb (1), liaweil (1), librum (1), libtastic (1), licht0611 (1), lifeinpast (1), Lilith2377 (1), lillyzo123 (1), lilmisstwitch (1), lince (1), linchy (1), lindsay1979 (1), linnea (1), Linw (1), linzey (1), lionwww30 (1), lisaknowsbest (1), lisbon (1), Listerbrowne (1), lite007 (1), Litehawk (1), litsista (1), littlewyvern18 (1), live\_bri16 (1), lizardgartixa (1), lizqwer (1), lizu2 (1), lji710 (1), lkh19980 (1), lkjfrf (1), lllittle (1), lmarieh8 (1), lmil (1), lmoulder (1), loganharris (1), lohmi (1), loic (1), lolatschini (1), lolkosk (1), loloflolss (1), long\_thai (1), loouke.fowtee (1), lordtrollface (1), lostmotel86 (1), louislc (1), loukas78 (1), lovely (1), lovelyjun89 (1), Loverofthelight200 (1), lschreffler (1), lseoh (1), lsturman (1), luc\_mennet (1), lucastest (1), Lucatiel (1), luciano.constantino (1), Luckyalias (1), luddeus (1), luisede-caux (1), Luisferceb (1), LuisLezcano (1), luizaalmeida (1), Lukasz717 (1), lukebroyles (1), lukff (1), lumakari (1), Lumos.de.Fortuno (1), lunasquest (1), lunk112514 (1), luten (1), luuuke (1), luvstoresearch (1), luxaky (1), luxoli (1), lyi87 (1), lymmie (1), Lynxu (1), Lysseral (1), m\_a\_u\_r\_i (1), m\_sud (1), m\_zubby (1), M... (1), Maadman7 (1), macandcheese (1), Machiavellian (1), matham (1), maddgarr (1), maddiee111 (1), maddieR (1), madiflesch (1), MadSanta (1), madwilliam (1), Mafalda (1), Mag534 (1), magi34 (1), magicpbb (1), magix430 (1), magnaspud (1), maian.chcha (1), maj084 (1), MajicR (1), majik8182 (1), makingpigfly (1), malinovskaya (1), Malsomalso (1), mami-dori (1), mandakins (1), manomanom (1), mantrox (1), manuben (1), manuelpc (1), maozillah (1), mappingbabel (1), mapuhi (1), mar131 (1), marali0 (1), Marcelanski\_101 (1), MARCELOW (1), marco.floresloaeza (1), marcocuturi (1), marcorad (1), margriet (1), mariacrilu (1), maria591 (1), MariaLeon05 (1), mariamma (1), Marie\_ (1), marija\_go (1), mariliaamando (1), Mario1211 (1), MarioG (1), mark\_block (1), markbashta (1), marksiege (1), MarkusJansen (1), markusrobam (1), MarooooooooooooN (1), marsgareta (1), marshall86 (1), marshalls (1), marshjcb (1), marsprobe (1), marta\_mil (1), martaronzi (1), MartianGlitch (1), martin.shue (1), martinablava (1), marTinaK (1), martinet (1), Marusya (1), MarvinKim (1), masa.welch (1), masharpe (1), masooga (1), massivetaco (1), matmazellisistrata (1), mato123 (1), matostus23 (1), matthewfreeman (1), mattrob (1), mattybobo (1), maverik (1), maxbigwood (1), Maxima (1), maxin104 (1), MayanHero (1), Mayenla (1), Mcarrete (1), mccannsmithe (1), mcginnas (1), mcttocs2 (1), mcvillam (1), meagany (1), meaghantron (1), mebn (1), mechnotech (1), Mechtecs (1), mecornel01 (1), Megafunk (1), megasevo (1), mehn (1), mei0016 (1), melkor (1), Mellizzia (1), melo459 (1), melongist (1), memorial (1), mendacil (1), mensinda (1), merbman (1), mercedeh (1), mercury (1), mercurychaos (1), Merithea (1), merrym2010 (1), merus (1), MesAnDu (1), MeShell (1), meshervonbron (1), Metallion (1), metapharsical (1), metaphorically (1), Metrosaur (1), mezner (1), mg566378 (1), mgjerde (1), mgp0127 (1), mgrayson2019 (1), micetea (1), mich3113 (1), michaelrshannon (1), micheel665 (1), michelangelo1989 (1), michu11 (1), mickgee (1), Micko (1), micmic93 (1), micmor (1), Micocoulier (1), Mieke.e (1), Mielczanin (1), miguelvillavicencio (1), miguelw (1), MIhailo (1), miire007 (1), mikechania (1), mikek302 (1), mikeray13 (1), mikeureko (1), Mikey97 (1), Mikeybarro15 (1), Mikouz (1), milanjyu (1), Mileszacharymiller (1), milgrim (1), milk0213 (1), milodavis9 (1), Milten (1), mimipipoun (1), min\_J94 (1), Minamikaze (1), Mindedsly (1), mindflo (1), mindyv (1), mincraftman (1), minem (1), mineralsEW (1), minjoon (1), minoseleftheriou (1), minsun890 (1), mintse (1), mirap (1), mirkot (1), MirSeason2 (1), misanek1 (1), mishkau (1), miss\_nommer (1), mist7676 (1), Mizio (1), mje (1), mjk303 (1), mjomack (1), Mk3Y (1), mkjain (1), mkmitch (1), mmartij (1), MMaxHH (1), mmczaplinski (1), mmewinchester (1), mmme (1), Mmmmm12345 (1), mmorenof (1), mobius\_12 (1), mohana.dahir (1), MojoEddy (1), mokrzy (1), molk123 (1), mollylennon (1), molord (1), momarti (1),

mommymoose8 (1), Momo00002 (1), monee (1), MonicaShin (1), monizka (1), monolar (1), monowon (1), monsterko (1), MooCakes (1), MooJin (1), moonblade (1), moonkuh (1), moonyx (1), morninddew9 (1), mowalie (1), mpipfeiffer (1), mpleijzier1 (1), mpmatwrc (1), mqkr93kr (1), mr\_cord (1), Mr\_GUTS (1), mr.Dir (1), MrBanana514 (1), mrbotello (1), MrEd65 (1), MrEvildoom (1), MrFarhat24 (1), MrFrummel (1), mrkh (1), mrme945 (1), mrmilhaven (1), mrmoptop2 (1), mrpesas (1), Mrs.Jurgensmeyer (1), mrseamiccon (1), mrshgwms (1), MrsShkako (1), mrtneuron (1), mrtoast (1), mrtwister (1), ms971015 (1), msanteler (1), mtb1423 (1), muchow (1), mugdha.rd (1), mukid (1), mumcia (1), muppet (1), murilka (1), murraybiscuit (1), murraythedts (1), muskangumber (1), musket456 (1), musumer (1), mutantburrito (1), mvidecoq (1), mwh5316 (1), mxm1117 (1), myriac (1), Myrline (1), mysterybh (1), mystic23 (1), mythique94 (1), myzelf (1), n4dc1 (1), nadia (1), Nahmid (1), nahomi (1), nalan87s (1), namanpatel (1), nanainis (1), nanautismo (1), nandajra (1), narcissistfreak (1), narua89 (1), Nasus\_Bot (1), natalie5555555 (1), natel (1), nathan95 (1), Nathaniel\_hejduk (1), nathgn (1), natlampen (1), natsingleton (1), natuke (1), naturalre-sist (1), navadon (1), navi10 (1), nchapkis (1), NCrit (1), neal53154 (1), Nebanchodancho (1), nebo (1), nechy (1), needysteevy (1), neels (1), neferian (1), negativemilk (1), Nehemias (1), Neibeo (1), NekoToKitsune (1), nele (1), nelsonsteinmetz (1), nemicide (1), neoking (1), Nereo (1), Neta\_Sp (1), netphax2 (1), neurociborg (1), neurocomic (1), neuroi (1), neuronba (1), neurons (1), neurosearcher (1), Neverbolt (1), nevermind (1), Nhoron (1), Niamhleon (1), nic\_wwf (1), Nicholasrunner (1), nickrossi79 (1), nicksilva (1), nicolagreco (1), nighthowl (1), Nightschade (1), nik9618 (1), nikolay g.c. (1), Nilia (1), nilovelez (1), Nimbus (1), Ninjanico12 (1), njs04069 (1), nkem3 (1), nlsambas (1), nlsoy (1), nmalick (1), nmam (1), nmtucson (1), nob00bsnolikes (1), NoCashValue (1), Nocturne (1), Nodens (1), nodonttakethose (1), noeckera (1), nofairyoucheated (1), nommedy (1), nononononononononono (1), nopenotrightnow (1), NoraDJ (1), Norons (1), northmonkeyboy (1), NorwegianViking (1), NottRiick (1), nowcho0316 (1), npallsopp (1), npelzer (1), npio (1), nsalvi99 (1), nsegal (1), nsegura2019 (1), Nseraf2 (1), Nseraf3 (1), nstrento (1), nucleark1 (1), Number13Mike (1), Nurio (1), nuvano (1), Nv17 (1), NxtGenBass (1), NyarCat (1), nyox (1), nywoo5278 (1), o\_tykholaz (1), obeda\_kailani (1), obohobo08 (1), oboncore (1), Oc3an (1), ocar438 (1), odeds (1), oeldelynx (1), ogleezy (1), oh\_minseok (1), OhBobbyD (1), ojuang (1), Oke (1), Okharev (1), olciao99 (1), oleksandr (1), olives (1), olybanker (1), omega123 (1), Omegatrek (1), omnipree (1), one\_gene (1), onestep00 (1), Oninoni (1), onjo (1), onukon (1), onyoo5617 (1), ooti9 (1), operty4325 (1), ophelia (1), OrangeYoshi99 (1), os1123 (1), oscaravy104 (1), osu\_luke.1 (1), Ottar (1), outof5 (1), ovenel (1), oystein (1), pabloalvarez619 (1), pablojenkins (1), paige606 (1), Pak (1), pakedskeezer (1), pamador (1), Pamar91 (1), pan\_omastek (1), PanDan (1), pandas (1), pantsandshirt (1), papa-gaia (1), paracocci (1), paratso (1), parejo89 (1), parkjohn0109 (1), parthi (1), partychoke (1), Pasis (1), pateck (1), patkro12 (1), patreng104 (1), Patricia\_C (1), Patriotfros15 (1), patty\_a\_gogo (1), Paulaa (1), paulpaul (1), Pawcioo18 (1), pblum2020 (1), pbrane (1), pcy29521 (1), pdlobster (1), peachesenregalia (1), peachfriedrice (1), pear0803 (1), pearlshell0 (1), pearlto (1), peel4300 (1), pegasus1997 (1), pekucz (1), penfold (1), pera7 (1), peter.h (1), peter604 (1), petersg1 (1), petopo (1), petras01582 (1), petrchor (1), pewsh (1), pfhgetty (1), pgks6115 (1), Phaedrus (1), phdsng (1), phibu (1), philamusant009 (1), photoshopaholic9 (1), Pielover (1), pihi (1), pikachujiwoo (1), pikku (1), Pikmen1234 (1), Pilligrimmik (1), piterjuni (1), pixelwurm (1), pjjpjj111 (1), pkmrufus (1), plarag (1), plodicus69 (1), pm08 (1), pmcbrien (1), pmitchell490 (1), poe (1), Pomedlavi (1), ponpon (1), poptart (1), porkipig123 (1), porsiel (1), potads (1), potatornakg (1), PotatoZOA (1), poty (1), powerranger (1), POYI (1), ppoznan (1), pprado (1), Prahli (1), Prapic (1), Pray (1), prayers1966 (1), Princess.L.S (1), prittle (1), pritch818 (1), privette (1), Prophet (1), prophettime (1), Prothesian (1), psicolabis (1), psilentasincjelli (1), psj920 (1), psw759 (1), psychoelitenz (1), psyilo (1), ptarrant (1), purkinjcell (1), pushpendra (1), puzoniasty (1), qbdpqdbp (1), qert134 (1), Qetsiyah (1), QiTing\_Ye (1), qkr2896 (1), qkrskfk0002 (1), qkrthdus3203 (1), qkrtjdwns2 (1), qkrwlgml97 (1), Qlymax (1), qo5466 (1), qoo4869 (1), qpwo-jieun (1), quads (1), qualitycurls (1), quanpham1 (1), queena0524 (1), queene (1), QueenLiz (1), QuimFernandez (1), quincy\_e (1), Quinine (1), quiqui (1), quitnowusuck (1), quza (1), qwasdf123 (1), qwe852123 (1), qweqazsdx (1), qwerty125 (1), qwertyqwerp (1), r.stankevics (1), r097 (1), rabbitz (1), Racc (1), rachaelbuchanan (1), RachelFodor (1), racheleek (1), rad1ophon1c (1), raeyZ (1), rafaelbrito2003 (1), rafaempala (1), rafahsg (1), railbuzz (1), RaineKos (1), raiserscharpe (1), raizenko (1), raken0343 (1), rakshassa (1), rameshtaK (1), ran27 (1), ranchi (1), RandomWalker (1), ranger309 (1), rangerpez (1), raphwang (1), raptorfx (1), Rarityizswag (1), rasheperd (1), rastamon888 (1), rastkyle (1), ratadp (1), rattenjunge (1), raulraulraul (1), raw10 (1), Ray\_Chae (1), raylin1869 (1), raziell\_tzu (1), RAZMAN (1), rbals3930 (1), rcronshaw (1), rcuozzo (1), rderien (1), realJohnDoe (1), rebec.leu (1), Rebecca1809 (1), redcarey (1), redjim99 (1), redt77 (1), regina0117 (1), rememberchicken (1), Renaldo2120 (1), renatafr3 (1), renee1 (1), ret-toni (1), Revision (1), revenue (1), revjb (1), rex123 (1), Reyu (1), rezendes (1), rgdkdle14 (1), rgeoffrion (1), rgirard

(1), rgvogt (1), riaf99 (1), riahwillow (1), ricker (1), rickkong (1), ricosuave6177 (1), riebmann (1), RightfulFallen (1), riioiii (1), RileyAnne (1), RIMJ (1), Rina (1), rivergirl (1), riya716 (1), rjt1050 (1), rjy0824 (1), rkfka4351 (1), rlaqjatjr02 (1), rlion1 (1), rmazon2019 (1), rmckendree (1), rmckinne (1), rmrabt (1), rmsxo97 (1), rnjs93 (1), roas-tah (1), rob91 (1), robberst (1), Robert\_Austad (1), RobertRush (1), robillard2010 (1), robinroc (1), robrosencrans (1), rochellern (1), RocioGuevara (1), rockittothemoon (1), Rodentman87 (1), rodnebones (1), rodolfomonteiro (1), rogggenbrot (1), rollinsadam (1), ronnieh (1), roroyyy (1), roryrhys (1), rosacarmel (1), roscoeman (1), rossunger93 (1), rotkiv (1), roverandom (1), roxayroxay (1), royn (1), rrose (1), rsh321 (1), rsklaren (1), rstat1 (1), rtm53151 (1), ru\_yih (1), rubab (1), rubiii (1), Ruddles (1), rudude456 (1), ruelle95 (1), rufpsss (1), rufusisnodufus (1), ruja (1), rume0324 (1), run2pluto (1), Runcia (1), rupertismydog (1), rurgar86 (1), ruship (1), ryan\_piktel (1), ryan.byrne14 (1), ryan6or (1), ryan9lim (1), ryangrus16 (1), ryanh (1), RybaPL (1), Ryo (1), Ryuskae (1), ryytikki (1), s\_minj94 (1), s.sesek (1), sadecampbell (1), sadistic\_jiggle (1), sadjoy1 (1), saduuqkim (1), Safler (1), safonov.a18 (1), sahana (1), sahardki (1), saintian13th (1), Sakarias411 (1), salo.msolis (1), salonishah (1), samiam42998 (1), samil231 (1), samin (1), samjade (1), samsower6768 (1), samuel715 (1), samuelc7 (1), sandman1104 (1), Sandy555 (1), Sarah.K (1), sarahj33 (1), sarekofvulcan (1), sarit.h (1), SassyFrass8 (1), satchiev (1), satnamsidhu (1), SaturnX (1), saulodevos (1), Saulolalli (1), savi (1), savinglol (1), sayyoung (1), SbIrsato (1), sbricau1 (1), sbush42 (1), scaevola (1), sceedwe (1), scheky (1), scherert (1), Schobbit (1), science057 (1), scienceninja2 (1), Scorcha93 (1), scott.willic (1), SCPro (1), sdanieloh (1), seancam300 (1), seanclauson (1), seandempseygreg (1), Seb (1), SebastianG8 (1), Sebbbson (1), Secone (1), secret4v (1), SecretMew (1), sefira (1), sehyun\_97 (1), seiyashi (1), sejeong33 (1), selfee (1), SelfGamer (1), semismart9 (1), senorcheaposgato (1), senorluke (1), seonga2002 (1), seosuper01 (1), sergeyvass (1), sericite (1), Sery (1), sethorrrwhat (1), Sethwasmo (1), setuablaze (1), sewa958 (1), sfaxtis (1), sflett1989 (1), sgemmi (1), shacharoz (1), shadow850 (1), shadowblaze (1), ShadowCX (1), shaggyfort1e (1), Shake (1), shall147 (1), shanski (1), sharktopus (1), shashel (1), shaynaherns (1), shelleye (1), sheppy (1), sherwing01 (1), shinwonp (1), shinyarceus4 (1), shkim3988 (1), shockerman15 (1), shorokin (1), shortyone (1), shuisman (1), si14 (1), sighthndman (1), sikong32 (1), Sildrien\_Greyheart (1), silvair (1), silvanuyx (1), Silver\_Rhino (1), simmbot (1), simonsong (1), simplon70 (1), Simplorio (1), simsijang (1), simultanagnosia (1), sinan (1), sirdroftardis (1), sirhucksalot (1), siteran (1), sj2015 (1), sjgre2012 (1), sjnosaju (1), skerkrov (1), skhakpour (1), skidive (1), skilipadde (1), skillsmaster9 (1), skillz333 (1), Skizo84 (1), skrecok (1), skstein (1), skuffie (1), Skull2631 (1), SkyfLoWer99 (1), Slacker (1), slackerinto (1), slat-ngo (1), slavin (1), SleepingGM (1), sleepy (1), slice (1), slightly00 (1), sliwowitz (1), slsk789 (1), slvrshadow (1), smadacsi (1), Smalser (1), smeyer91 (1), SMilanes (1), smileyfan (1), smilie224 (1), smont (1), Smudgeorama (1), sn0wbars (1), snaysler (1), SND (1), sneaky90210 (1), sneakyraptor (1), sniper35 (1), Snippy (1), SNOOP\_WHALE (1), snowcat (1), snowrunner92 (1), Soccer253 (1), soccerdude71092 (1), soda122 (1), SoddaPopper (1), sohee5143 (1), sokrfreak28 (1), solarisv (1), Solid\_Snake\_ (1), solier (1), sollenac (1), solvented (1), somethingorother (1), som-nium.jk (1), soncenzo (1), songkiherckd (1), songkm2 (1), Soniasv (1), sonic9105 (1), Sonmi298 (1), Sonntagsrot (1), soohyunglee (1), Soonergrad (1), Sophia6879 (1), sophicat (1), sophiejane91 (1), sophmk18 (1), SoraAgrees (1), soulych (1), soybb (1), space\_fountain (1), spacess (1), spacewolfXfr (1), spade1999 (1), sparky492 (1), spar-row (1), spaztazim (1), spencer3035 (1), SpencerWad (1), spestandkiwi (1), sphemister (1), spicka12 (1), spingk (1), Spinmaster (1), Splash\_ua (1), spottail (1), springroll (1), sprinter\_ru (1), Sprixie (1), spudston (1), spydr (1), srballes-teros (1), sreehari (1), sregressor (1), sridharpasala (1), sserei (1), sspyross (1), SSSDante (1), ssss9907 (1), stInkf1st (1), Starbase3 (1), starkgm (1), starlightmoons (1), stashman (1), staticnrg (1), stben61 (1), stburnham (1), Steemo (1), Steezem (1), stefanb (1), stefanobotch (1), stephanie42 (1), stephencharles (1), steve.shin.33 (1), stevenkop (1), stevi153 (1), stianfan (1), stl74 (1), Stofn (1), stolen\_hippos (1), stoned93 (1), stoopkid (1), stormm (1), stormylove (1), straus (1), streetflash (1), strong0917 (1), stuli5 (1), Stwert (1), stygarfield (1), subprocess (1), Sucek (1), sudos-apphire (1), suglob (1), sungsu7437 (1), Sunshineraiden (1), sunshyne (1), supahsizedmcshizzle (1), superk0911 (1), SuperPonyAwesome (1), supersig1331 (1), superwholocki (1), Supreme (1), SurbhiPriyanka (1), SurgeOnGeneral (1), susanhess (1), susiecumberland (1), sutuhl (1), SUZALT (1), suzykim (1), SweetChastity (1), sweetillu (1), syhvs0208 (1), syjk506 (1), SylvrFonic (1), synek (1), Syntroklin (1), syszkamodliska (1), t.bot (1), t123321t (1), t34rg45 (1), Taburn (1), Tadla (1), taehoon9876 (1), taeyeonwkd (1), taimursiddiqui (1), taleahpierce (1), tallestzim (1), tamsyn98 (1), TanEleven (1), tannerbuck5 (1), Tarheelsam (1), TaufiqHaron (1), tayby2013 (1), taylorflynn (1), taylorpack13 (1), tbonebeaman (1), tcdege (1), tdierze (1), teamkills (1), techn1cs (1), TeeJayKid (1), teeprimm (1), TeeRavGee (1), teetertotter2 (1), telon (1), temishia (1), Tendencia (1), tenek (1), tequilajoe (1), terasco (1), teronix (1), tesarada0615 (1), testaccount3 (1), testscout (1), tevo (1), tfrog (1), Thalloc (1), The\_M\_Star (1), TheAidmaster (1), Thealy (1), thea-

mazeroth (1), TheBlueLady (1), thebolivian (1), TheBoredom (1), thecat (1), thechubbyfishy (1), TheCriticChicken (1), TheDg403 (1), theджиango (1), TheENDEROR (1), thefieldrecorders (1), theginger22 (1), TheGriffin (1), TheGus (1), TheJamaicanMon (1), thelittlesparrow (1), themell (1), TheOldTaleofLink (1), ThePersonYouDontKnow (1), thepic (1), therealpope17 (1), TheShknifer (1), theshyfirefly (1), thesunalsoises (1), thetrex (1), thetyler (1), thevark1 (1), thhunter (1), thiago.pereira.121 (1), thor12 (1), thou000 (1), Thumpster (1), Thunderbeast (1), thunderplums (1), ticking (1), ticktock (1), tiffiff103 (1), tigerpurple (1), timbevan (1), Timeglitch (1), timeleaf (1), timi23 (1), timlang (1), Timonin (1), timopheym (1), tintelotte (1), titoalba (1), tjalsdn91 (1), tjdgnsqn (1), tjdwns7710 (1), tkdaud4 (1), tkfud85 (1), tkoch (1), tlrfkcl (1), tndyd0526 (1), tngus1407 (1), ToadEater (1), ToastyGaming (1), todd5084 (1), tomchad (1), Tomes (1), tomliau33 (1), Tomtankpl (1), tomvl117 (1), tomwar (1), tomy (1), tONLaR (1), tonyjoeeee (1), tonyliutl (1), tonsax (1), Topchock (1), TOPKLONOU (1), tori\_guise (1), torontoeyecare (1), torpedo2222 (1), totally\_not\_nkem (1), toxmed (1), tozzoneto (1), tpgzn (1), traceytaylor (1), TraciBA (1), tracymoore (1), TRANE-ofTNER (1), travis1001 (1), TRE012 (1), trepidation (1), Trexer (1), TripleD (1), trkkara (1), trmn8tr (1), trogers (1), trolltroll (1), troopoort (1), trtrjyrki (1), TrumanV (1), tsean1978 (1), tsimes (1), tuck (1), TuckLive (1), Tufoge (1), tuliop (1), turbofx (1), Turkey (1), turnup (1), Turrex (1), tuttleduck (1), tuusannuuska (1), tvolk131 (1), TweakyPower (1), tweekin1 (1), twh (1), twhun (1), twinflamephoenix (1), twisternok (1), Twitchems (1), tylermastey (1), tymoczkk (1), tytwee (1), Tzaika (1), tzigarroth (1), Uhurson (1), ulises1881 (1), Una (1), UneHumaine (1), Uni (1), unknowed (1), unnm\_stmc (1), unmucchio (1), unoriginalhipste (1), unrpto (1), upgradd (1), ur0b0r0 (1), urscion (1), use.an.alias (1), user2312 (1), username0o7 (1), username1 (1), utterlytragic (1), uvblue (1), v\_isaacs11 (1), vaidehi31 (1), vailey (1), Vakarian (1), ValerieVonck (1), valmello (1), vampavril (1), vanina (1), vapor95 (1), Vapsik (1), varanfc (1), varki (1), varyar (1), vasi (1), Vatile (1), vayah (1), vector010 (1), veeloon (1), vefelo (1), veggiebarbie85 (1), venuscutzie45 (1), venzer (1), Vericima (1), veritas1986 (1), VeroS (1), verthelion (1), vertigozero1 (1), veshka (1), vetsomeday (1), vezixig (1), viccie211 (1), vicmat (1), victordzrz (1), Viire (1), vikasrij (1), viksta (1), Viktoraito (1), viktorlaszlo (1), viktoryte (1), vinned8928 (1), vindictum (1), vintro (1), viredae (1), viswajit (1), vivabella (1), vlad (1), Vlad-Gold7 (1), vladiator (1), vlshzldh999 (1), vndt (1), vneuman (1), VOL (1), volanaro (1), volvman (1), VonDefault (1), Voytos (1), vpallati (1), Vraithier (1), vtack (1), Walle (1), Walo (1), walrider (1), wamae (1), Wanderer (1), wangbal (1), wantsomuchmore (1), wardmans (1), warp54 (1), waymyers (1), waynechen (1), wbehri01 (1), WeakestLink (1), weavluca857 (1), weddersinnes (1), wederw (1), wee (1), wendytsai223 (1), werkuh (1), Wero (1), Wevel (1), wgfra (1), whansen (1), whgusrl1245 (1), WhiteCrow (1), whiteowl (1), whl\_se (1), WhovianSuperHero (1), WhyNot (1), wicks (1), wide2011sag (1), Wie (1), wilcan (1), wildjod (1), will\_dormer (1), will3882 (1), William303 (1), williamtcat (1), willsons (1), willypoos (1), windamn (1), WintersSnow (1), winwin5 (1), WireSeb (1), wiseninjabob (1), WiShMa (1), witek (1), WittleZimmy (1), WJJO (1), wjstjrcns (1), wkdwddn06 (1), wlah1234 (1), wldbwn33 (1), wlsals (1), wltjd7601 (1), wnalstn1235 (1), wndnjs1254 (1), wnsdh (1), wngus3719 (1), Wo0d5t0cK (1), wogh6311 (1), wojtek2 (1), wolfsandle (1), Wombatti (1), wondertracker (1), woochan1223 (1), wood27 (1), woodleader (1), Woodsmalla (1), woody333us (1), woopswon (1), wooyunhui (1), workensm (1), wpdltm33 (1), wrackdock (1), Wri-bobby (1), ws\_dominance (1), Wunarg (1), wwaust (1), wwo1013 (1), x123123 (1), xamus (1), xarxargum (1), xelsire (1), xen (1), xenonlord42 (1), xfiler (1), xiaoju (1), xiaolicbs (1), ximeiyue26 (1), ximple (1), xKubo (1), xl0Wolf0lx (1), Xlplkfok (1), xlrX (1), xlunacy (1), xoEnigmaox (1), xorb0645 (1), Xorga (1), XPhoneLee (1), Xqua (1), XRJPK (1), XRoNiN (1), Xshow (1), xuguizhou (1), xxafok (1), XxAzertyxX (1), yagiden (1), yahoyoungho (1), yakmp (1), YakoA (1), yamitrevor (1), Yanabau (1), yangddo (1), yargo (1), yaspo (1), ycw9921133 (1), yeloon (1), yeouinaru (1), Yesh\_J (1), yesluh (1), yesterdayschild (1), Yestone (1), YEWBOY (1), YG (1), ygtkly (1), yhyboo (1), yifanmayr (1), yj378 (1), yky012625 (1), ylee0730 (1), yo5yoman2 (1), YochaSteiner (1), yoda2222 (1), yodamaster07 (1), yong115 (1), yongh528 (1), yongin0803 (1), yoon\_407 (1), Yoshin (1), you123456 (1), YouAreEmpty (1), YouBumder (1), your\_B08 (1), yourmainbro (1), youssii (1), ypahalajani (1), ysun03 (1), yuj9710 (1), Yukth (1), yuna335 (1), yv-  
duv (1), yvic (1), ywchoe (1), z\_13 (1), zabal (1), zalyX2 (1), zalzal010 (1), zaq8280 (1), Zard (1), Zarenor (1), Zaycenec (1), zanzas (1), zaze (1), zbioX30 (1), zeevsm (1), zeke (1), zenobia (1), Zenoo (1), zephyrgrrl (1), zero-  
sum79 (1), Zersk (1), Zerunaitio5299 (1), zeus2618 (1), zhangsarah3 (1), zhyaxu (1), zoldaten (1), zombienapoleon (1), zombiepenguin (1), ZombieSlayerRG (1), ZombiHed (1), Zonby (1), zoo\_In (1), zoomixy (1), zoraida1256 (1), zqasl551394 (1), zsheck1 (1), zuny25 (1), zxcvbnm123 (1), zz9115zz (1), zzzspawn (1)
