# Supplementary material
Source: PubMed Central journal article supplement (PMC6556895)
Supplement: NIHMS969080-supplement-Table_S1.pdf [file NIHMS969080-supplement-Table_S1.pdf]

**Cell, Volume 173**

## **Supplemental Information**

### **Digital Museum of Retinal Ganglion Cells**

#### **with Dense Anatomy and Physiology**

**J. Alexander Bae, Shang Mu, Jinseop S. Kim, Nicholas L. Turner, Ignacio Tartavull, Nico Kemnitz, Chris S. Jordan, Alex D. Norton, William M. Silversmith, Rachel Prentki, Marissa Sorek, Celia David, Devon L. Jones, Doug Bland, Amy L.R. Sterling, Jungman Park, Kevin L. Briggman, H. Sebastian Seung, and the Eyewirers**

**Table S1: Table of correspondence with previous literatures, Related to Figure 3.** Empty cells are correspondences that are ambiguous.

| High-level cluster  | Name | Other name                | Baden et al. [2016]   | Helmstaedter et al. [2013] |
|---------------------|------|---------------------------|-----------------------|----------------------------|
|                     | 1ni  |                           | G <sub>3</sub>        | -                          |
|                     | 1no  |                           | G <sub>3</sub>        | -                          |
|                     | 1ws  | M1                        |                       | -                          |
|                     | 1wt  | sustained Off alpha       | G <sub>5a,b</sub>     | 3, gc15-42                 |
|                     | 2an  | F-mini <sup>Off</sup>     |                       | 3, gc15-42                 |
|                     | 2aw  | F-midi <sup>Off</sup> , J | G <sub>4,6</sub>      | 1, gc14-30                 |
| Outer marginal      | 2i   |                           |                       | 1, gc14-30                 |
|                     | 2o   |                           | G <sub>5b,c</sub>     | 1, gc14-30                 |
|                     | 25   |                           |                       | 2, gc10-40                 |
|                     | 27   |                           |                       | -                          |
|                     | 28   |                           |                       | -                          |
|                     | 3i   |                           |                       | -                          |
|                     | 3o   |                           |                       | -                          |
| On-Off DS           | 37c  | On-Off DS, posterior      | G <sub>12,13</sub>    | 9, gc30-63                 |
|                     | 37d  | On-Off DS, superior       | G <sub>12,13</sub>    | 9, gc30-63                 |
|                     | 37r  | On-Off DS, anterior       | G <sub>12,13</sub>    | 9, gc30-63                 |
|                     | 37v  | On-Off DS, inferior       | G <sub>12,13</sub>    | 9, gc30-63                 |
| Outer central       | 4i   |                           | G <sub>9</sub>        | 5, gc37-46                 |
|                     | 4on  |                           | G <sub>9</sub>        | 4, gc35-41                 |
|                     | 4ow  | transient Off alpha       | G <sub>8</sub>        | 4, gc35-41                 |
|                     | 5to  |                           |                       | -                          |
| Inner-outer central | 5si  | HD1 or HD2                |                       | 11, gc47-57                |
|                     | 5so  | HD1 or HD2                |                       | 11, gc47-57                |
|                     | 5ti  | UHD                       |                       | 7, gc36-51                 |
|                     | 5l   | W3B/LED                   |                       | 10, gc44-52                |
|                     | 63   | F-mini <sup>On</sup>      |                       | 6, gc31-56                 |
| Inner central       | 6sn  |                           |                       | -                          |
|                     | 6sw  | transient On alpha        | G <sub>19</sub> *     | -                          |
|                     | 6t   | F-midi <sup>On</sup>      |                       | -                          |
| On DS               | 7id  | sustained On DS           | G <sub>25,26,29</sub> | -                          |
|                     | 7ir  | sustained On DS           | G <sub>25,26,29</sub> | -                          |
|                     | 7iv  | sustained On DS           | G <sub>25,26,29</sub> | -                          |
|                     | 7o   | transient On DS           | G <sub>16</sub>       | -                          |
| Inner marginal      | 72   |                           |                       | 8, gc21-69                 |
|                     | 73   | OND                       |                       | 8, gc21-69                 |
|                     | 8n   |                           |                       | 12, gc76-86                |
|                     | 8w   | sustained On alpha        | G <sub>24</sub>       | 12, gc76-86                |
|                     | 8li  |                           |                       | -                          |
|                     | 8lo  |                           |                       | -                          |
|                     | 82n  |                           |                       | -                          |
|                     | 82wi | vOS                       |                       | -                          |
|                     | 82wo |                           |                       | -                          |
|                     | 85   |                           |                       | -                          |
|                     | 9n   |                           |                       | 12, gc76-86                |
|                     | 9w   | M2                        |                       | 12, gc76-86                |
|                     | 9l   |                           |                       | -                          |
|                     | 915  |                           |                       | -                          |

\* G<sub>19</sub> is weakly SMI-32-immunoreactive. However, its estimated stratification depth does not match our 6sw cluster.
