# Supplementary material
Source: PubMed Central journal article supplement (PMC6556895)

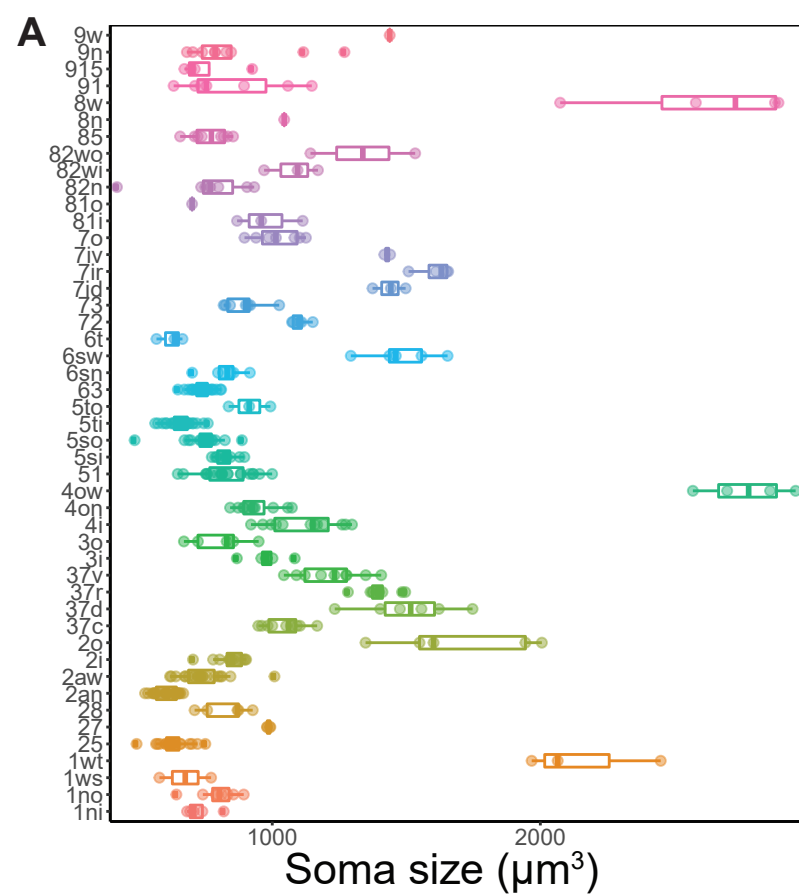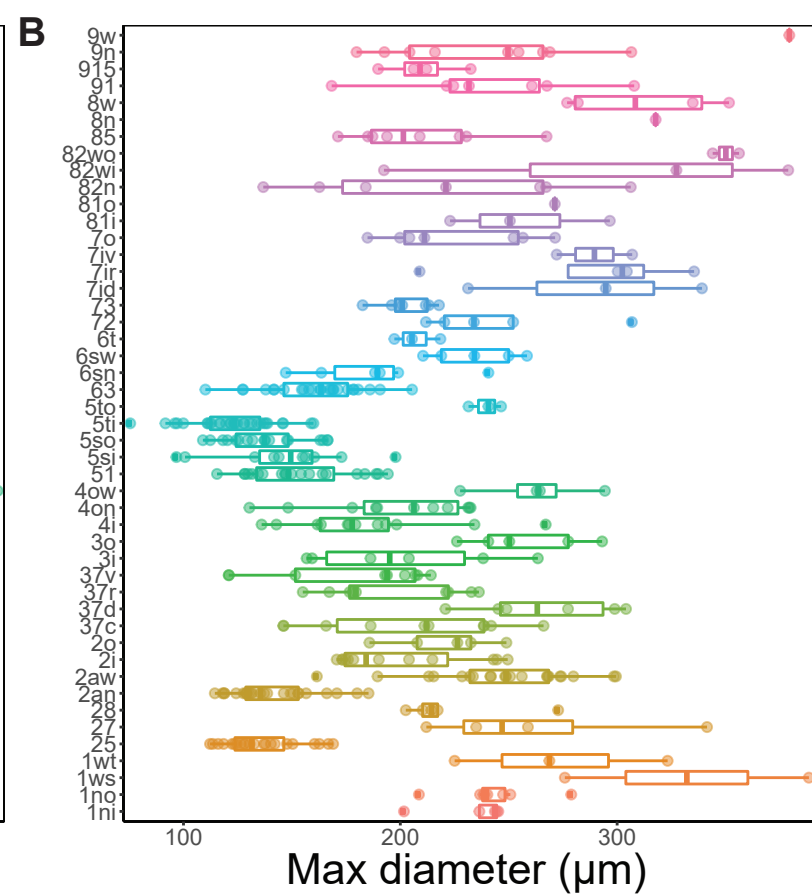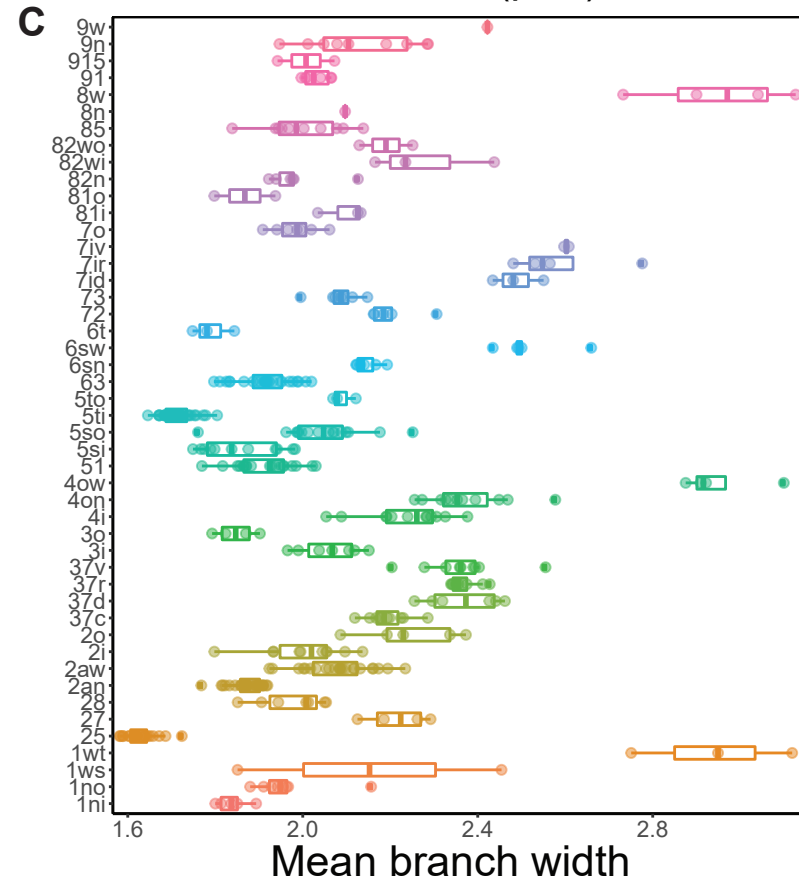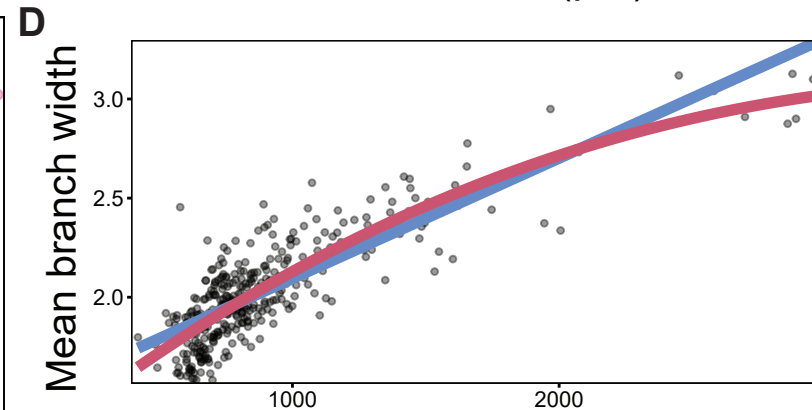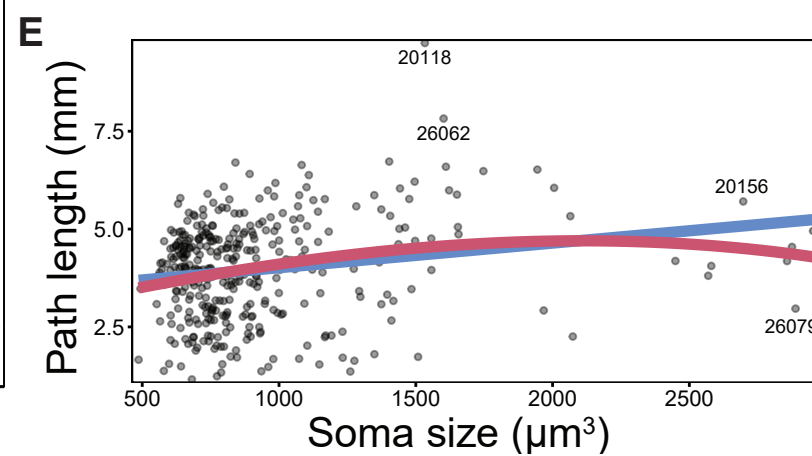

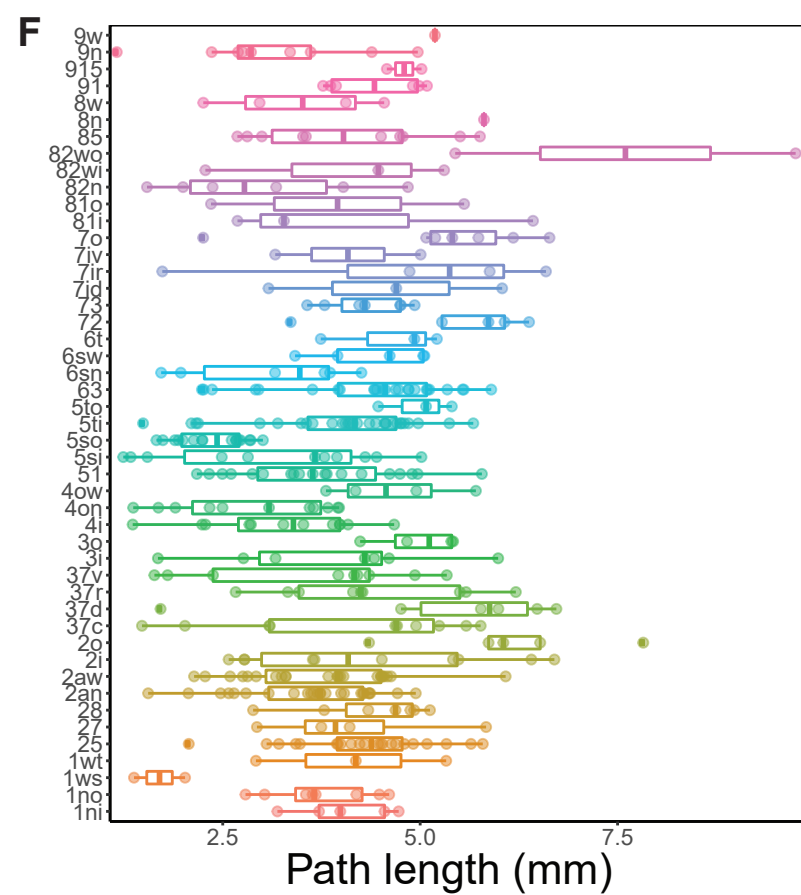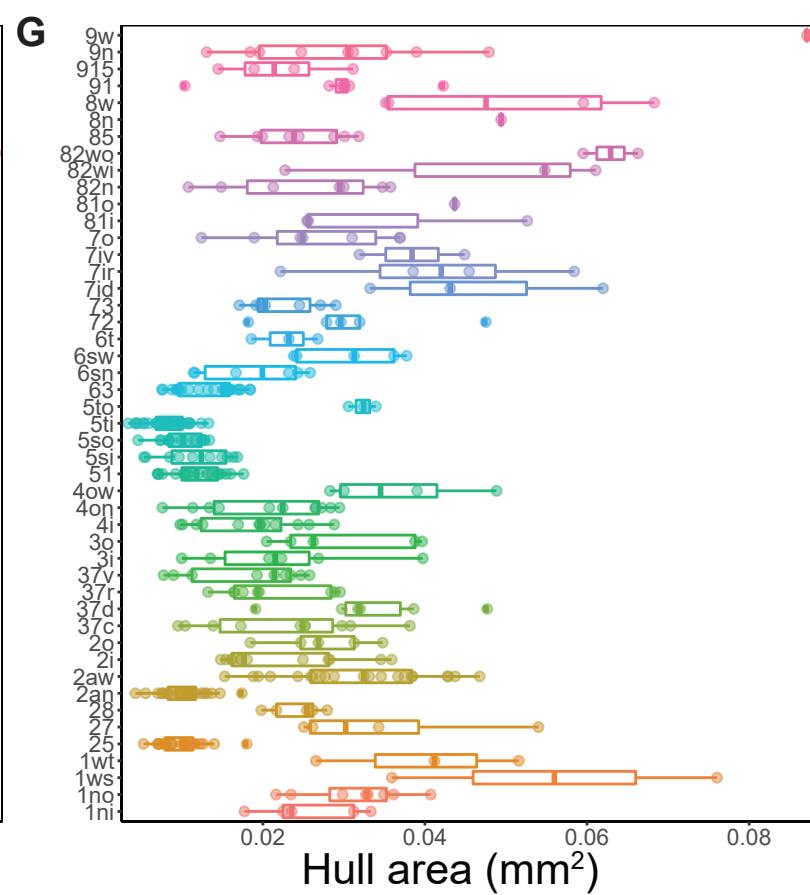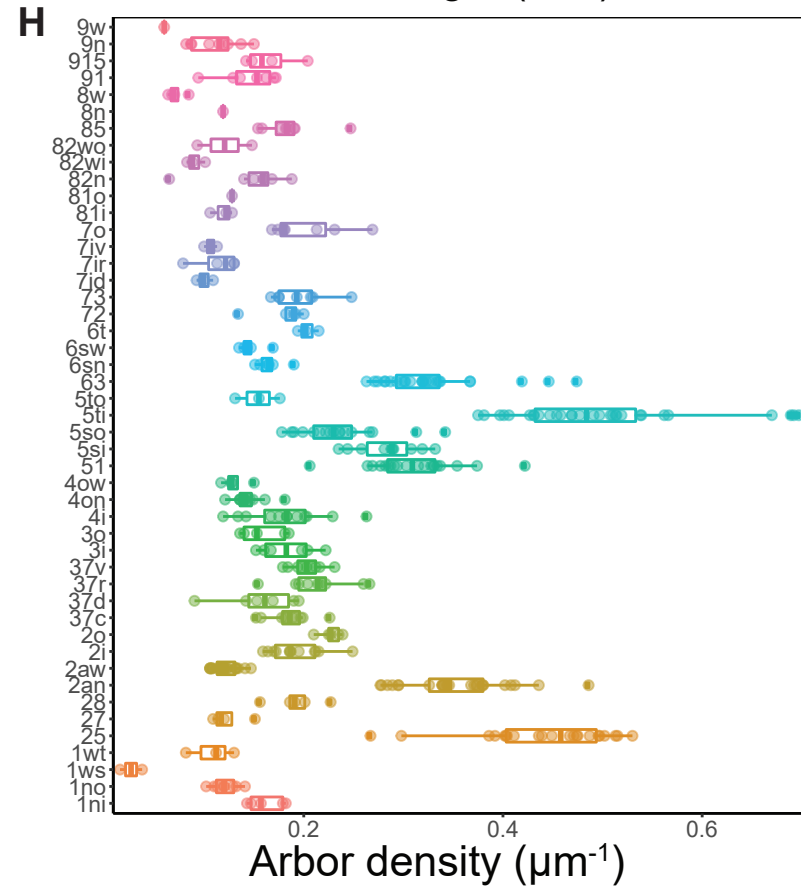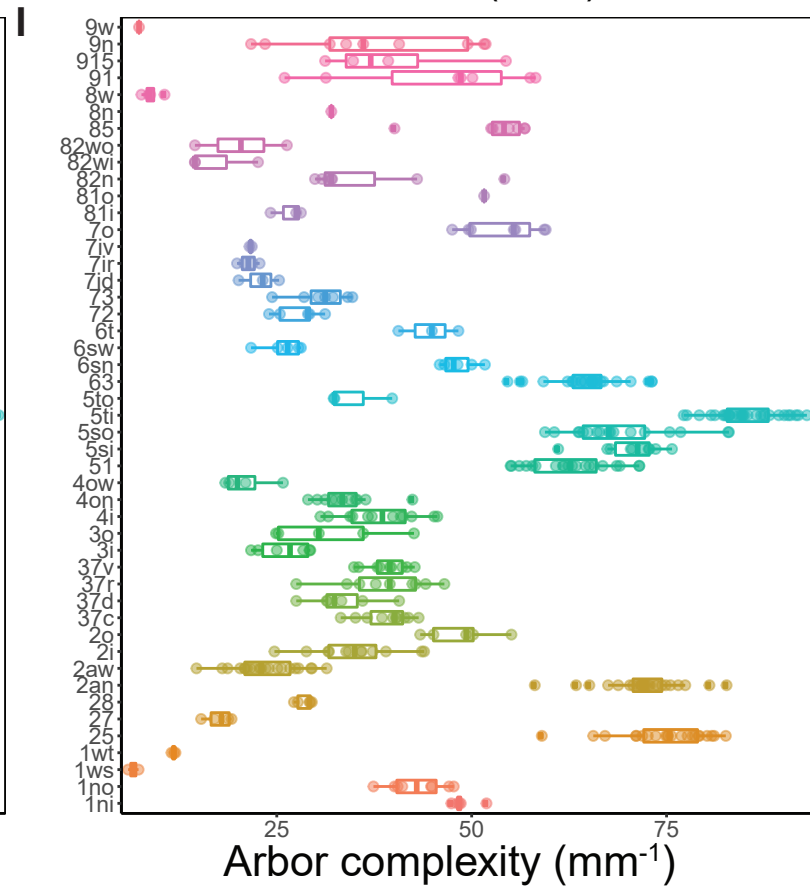

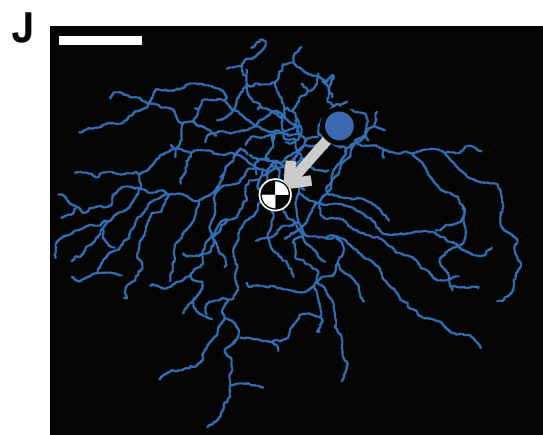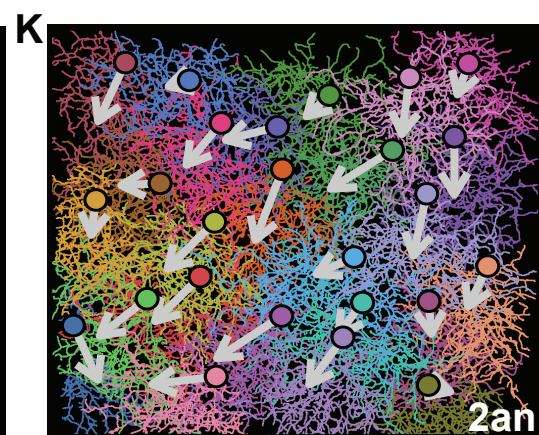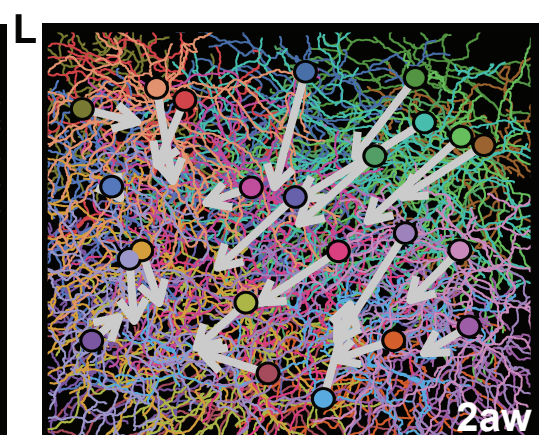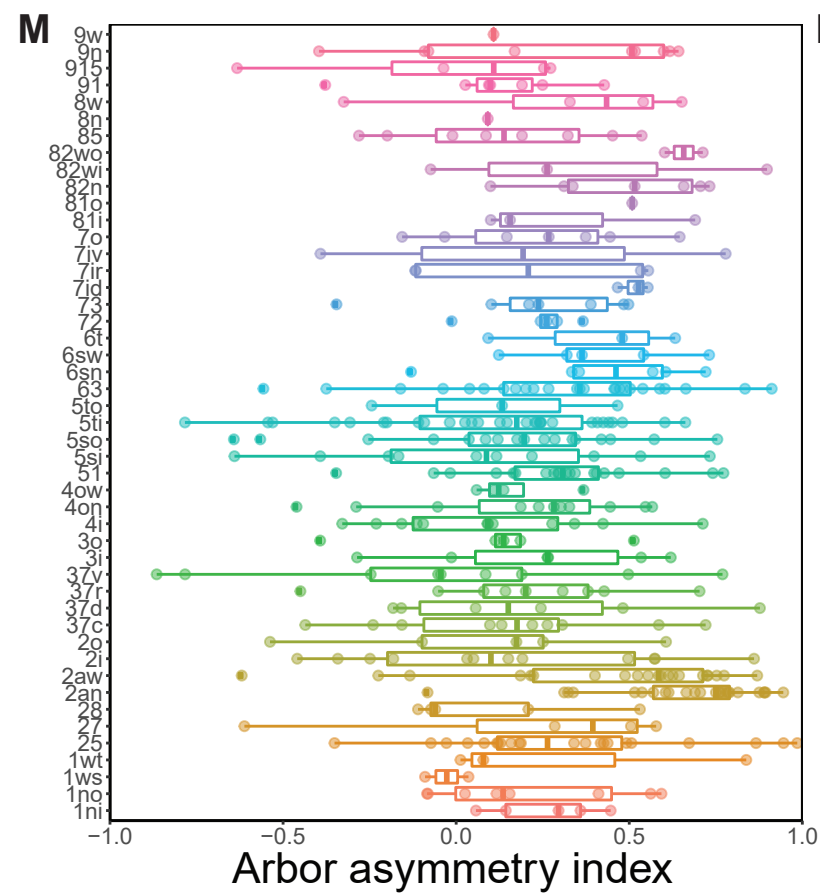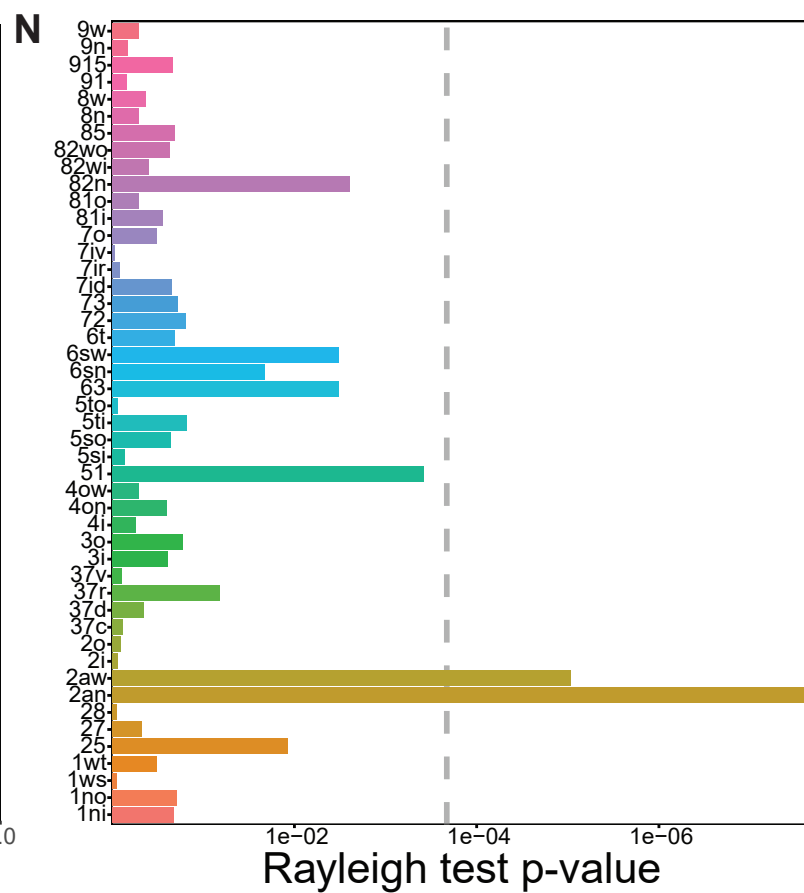

Supplement: NIHMS969080-supplement-Data_S4.pdf [file NIHMS969080-supplement-Data_S4.pdf]
